# Supplementary material for: Transcriptome and Proteome Response of Rhipicephalus annulatus Tick Vector to Babesia bigemina Infection
Source: Front Physiol. 2019 Apr 2;10:318. doi: 10.3389/fphys.2019.00318 (PMC6454348; doi:10.3389/fphys.2019.00318)
Supplement: Supplementary file 3 [file Table_3.xlsx]

## Sheet: Differential proteins
Supplementary Table S3: Analyis of the proteome of uninfected and B. bigemina-infected female R. annulatus ticks.
Differentially represented tick proteins. P<0.05.
			Infected/Uninfected
Uniprot	Description	Organism	log 2 (fold change)
B0X778	Histone H3.3 type 2	Culex quinquefasciatus	+∞
B6CMG9	Protective antigen 4D8	Haemaphysalis qinghaiensis	+∞
B7P1E3	Ornithine decarboxylase, putative	Ixodes scapularis	+∞
B7P6M6	Putative uncharacterized protein	Ixodes scapularis	+∞
B7P802	Map-kinase activating death domain protein, putative	Ixodes scapularis	+∞
B7PDA7	Placenta growth factor, putative	Ixodes scapularis	+∞
B7PGM4	Putative uncharacterized protein	Ixodes scapularis	+∞
B7PGN8	Putative uncharacterized protein	Ixodes scapularis	+∞
B7PIM9	Serine/threonine protein kinase, putative	Ixodes scapularis	+∞
B7PJV2	Putative uncharacterized protein	Ixodes scapularis	+∞
B7PKG2	Fasciclin domain-containing protein, putative	Ixodes scapularis	+∞
B7PLN4	Na/Pi-cotransporter, putative	Ixodes scapularis	+∞
B7PQ34	Peroxinectin, putative	Ixodes scapularis	+∞
B7PRH9	F1F0 ATP-synthase subunit Cf6, putative	Ixodes scapularis	+∞
B7PZM1	Putative uncharacterized protein	Ixodes scapularis	+∞
B7Q0S6	Putative uncharacterized protein	Ixodes scapularis	+∞
B7Q201	Agrin, putative	Ixodes scapularis	+∞
B7Q2C6	RAS-related protein, putative	Ixodes scapularis	+∞
B7Q5I3	Serine/threonine protein phosphatase, putative	Ixodes scapularis	+∞
B7Q5X1	Plexin B, putative	Ixodes scapularis	+∞
B7Q6P1	Peptidyl-prolyl cis-trans isomerase	Ixodes scapularis	+∞
B7Q787	Secreted salivary gland peptide, putative (Fragment)	Ixodes scapularis	+∞
B7Q9H6	Tetratricopeptide repeat protein, tpr, putative	Ixodes scapularis	+∞
B7QBX5	Thimet oligopeptidase, putative	Ixodes scapularis	+∞
B7QEV8	Pre-mRNA splicing factor, putative	Ixodes scapularis	+∞
B7QIB6	GTP-binding nuclear protein RAN1, putative	Ixodes scapularis	+∞
B7QN66	Elongation of very long chain fatty acids protein (Very-long-chain 3-oxoacyl-CoA synthase)	Ixodes scapularis	+∞
B7QNS6	Putative uncharacterized protein (Fragment)	Ixodes scapularis	+∞
C9W1L0	Phosphohistidine phosphatase 1	Rhipicephalus sanguineus	+∞
G3MF75	Putative uncharacterized protein (Fragment)	Amblyomma maculatum	+∞
G3MHF6	Putative uncharacterized protein (Fragment)	Amblyomma maculatum	+∞
G3MI80	Putative uncharacterized protein (Fragment)	Amblyomma maculatum	+∞
G3ML80	Putative uncharacterized protein	Amblyomma maculatum	+∞
G3MM12	Putative uncharacterized protein	Amblyomma maculatum	+∞
G3MMQ4	60S ribosomal protein L18a	Amblyomma maculatum	+∞
G3MPE1	Putative uncharacterized protein	Amblyomma maculatum	+∞
G3MPF4	Putative uncharacterized protein	Amblyomma maculatum	+∞
G3MQD2	Putative uncharacterized protein	Amblyomma maculatum	+∞
G3MQD5	Putative uncharacterized protein	Amblyomma maculatum	+∞
G3MR13	Putative uncharacterized protein	Amblyomma maculatum	+∞
G3MR41	Putative uncharacterized protein	Amblyomma maculatum	+∞
G3MRS0	Putative uncharacterized protein	Amblyomma maculatum	+∞
L7LQT9	Putative tick adams	Rhipicephalus pulchellus	+∞
L7LRS8	Uncharacterized protein	Rhipicephalus pulchellus	+∞
L7LUD9	Putative short gastrulation	Rhipicephalus pulchellus	+∞
L7LVC4	Uncharacterized protein	Rhipicephalus pulchellus	+∞
L7LVD0	Putative tick transposon	Rhipicephalus pulchellus	+∞
L7LVS3	Uncharacterized protein	Rhipicephalus pulchellus	+∞
L7LWS2	Protein-L-isoaspartate O-methyltransferase	Rhipicephalus pulchellus	+∞
L7LWY9	Uncharacterized protein	Rhipicephalus pulchellus	+∞
L7LZ40	Putative exosomal 3'-5' exoribonuclease complex subunit ski4 csl4	Rhipicephalus pulchellus	+∞
L7LZ63	Putative tick transposon	Rhipicephalus pulchellus	+∞
L7LZ85	Putative seryl-trna synthetase	Rhipicephalus pulchellus	+∞
L7LZW8	Putative arylsulfatase b	Rhipicephalus pulchellus	+∞
L7M152	Putative nucleostemin 1	Rhipicephalus pulchellus	+∞
L7M1L1	Putative ino80 complex subunit b	Rhipicephalus pulchellus	+∞
L7M2K5	Putative log-like protein	Rhipicephalus pulchellus	+∞
L7M2N4	Lysine--tRNA ligase(Lysyl-tRNA synthetase)	Rhipicephalus pulchellus	+∞
L7M344	Putative 5-aminolevulinate synthase	Rhipicephalus pulchellus	+∞
L7M3D3	Putative eukaryotic translation initiation factor 4e binding protein 1	Rhipicephalus pulchellus	+∞
L7M3G1	Putative sefir domain protein	Rhipicephalus pulchellus	+∞
L7M3J6	Uncharacterized protein	Rhipicephalus pulchellus	+∞
L7M3K2	60S ribosomal protein L13	Rhipicephalus pulchellus	+∞
L7M3X9	Uncharacterized protein	Rhipicephalus pulchellus	+∞
L7M476	Putative synergin gamma	Rhipicephalus pulchellus	+∞
L7M4D1	Putative replication protein a 32 kDa subunit	Rhipicephalus pulchellus	+∞
L7M4Z9	Putative alkyl hydroperoxide reductase thiol specific antioxidant	Rhipicephalus pulchellus	+∞
L7M7A3	NADPH--cytochrome P450 reductase	Rhipicephalus pulchellus	+∞
L7M7K7	Uncharacterized protein	Rhipicephalus pulchellus	+∞
L7M7U0	Putative sorting nexin	Rhipicephalus pulchellus	+∞
L7M839	Putative the ring-variant domain is a c4hc3 zinc-finger like motif found in a number of cellular	Rhipicephalus pulchellus	+∞
L7M8K7	Putative peroxisomal phytanoyl-coa hydroxylase	Rhipicephalus pulchellus	+∞
L7M8S9	Uncharacterized protein	Rhipicephalus pulchellus	+∞
L7M8T3	Putative malonyl-coa:acp transacylase	Rhipicephalus pulchellus	+∞
L7M9L2	Putative leucyl-trna synthetase translation	Rhipicephalus pulchellus	+∞
L7M9Q4	Putative golgi transport complex 1 protein	Rhipicephalus pulchellus	+∞
L7MA37	Putative der and-34 60 s ribosomal protein l44 (Fragment)	Rhipicephalus pulchellus	+∞
L7MAJ6	Putative apoptosis antagonizing transcription factor/protein transport protein	Rhipicephalus pulchellus	+∞
L7MAM1	Putative secreted protein	Rhipicephalus pulchellus	+∞
L7MBF5	Putative secreted peptide	Rhipicephalus pulchellus	+∞
L7MBT3	Putative leukocyte-antigen-related-like protein (Fragment)	Rhipicephalus pulchellus	+∞
L7MC48	Putative secreted peptide	Rhipicephalus pulchellus	+∞
L7MC86	Putative atp-dependent rna helicase (Fragment)	Rhipicephalus pulchellus	+∞
L7MDR1	Putative histone deacetylase complex catalytic component rpd3 (Fragment)	Rhipicephalus pulchellus	+∞
L7MDT7	Putative monooxygenase involved in coenzyme q ubiquinone biosynthesis (Fragment)	Rhipicephalus pulchellus	+∞
L7MEG7	Uncharacterized protein (Fragment)	Rhipicephalus pulchellus	+∞
L7MEX1	Putative o-linked n-acetylglucosamine transferase ogt (Fragment)	Rhipicephalus pulchellus	+∞
L7MEZ8	Putative inositol 134-triphosphate 5/6 kinase protein (Fragment)	Rhipicephalus pulchellus	+∞
L7MFA8	Putative threonine aldolase (Fragment)	Rhipicephalus pulchellus	+∞
L7MGL4	Putative methionyl-trna synthetase (Fragment)	Rhipicephalus pulchellus	+∞
L7MGP3	Putative replication factor c subunit rfc3 (Fragment)	Rhipicephalus pulchellus	+∞
L7MGT5	Uncharacterized protein (Fragment)	Rhipicephalus pulchellus	+∞
L7MH74	Putative tango (Fragment)	Rhipicephalus pulchellus	+∞
L7MHD6	Uncharacterized protein (Fragment)	Rhipicephalus pulchellus	+∞
L7MHI7	Uncharacterized protein (Fragment)	Rhipicephalus pulchellus	+∞
L7MHM7	Putative cuticular protein 21 (Fragment)	Rhipicephalus pulchellus	+∞
L7MIZ2	Mitogen-activated protein kinase (EC 2.7.11.24) (Fragment)	Rhipicephalus pulchellus	+∞
L7MJ48	Uncharacterized protein (Fragment)	Rhipicephalus pulchellus	+∞
L7MJ61	Putative heparan sulfate proteoglycan 2 (Fragment)	Rhipicephalus pulchellus	+∞
L7MJJ9	Uncharacterized protein (Fragment)	Rhipicephalus pulchellus	+∞
L7MK00	Putative tick serine protease (Fragment)	Rhipicephalus pulchellus	+∞
L7MK40	Putative chromatin remodeling complex wstf-iswi small subunit (Fragment)	Rhipicephalus pulchellus	+∞
L7MKN7	Putative tick transposon (Fragment)	Rhipicephalus pulchellus	+∞
L7ML19	Putative ubiquitin protein ligase (Fragment)	Rhipicephalus pulchellus	+∞
L7MLM2	Putative frayed (Fragment)	Rhipicephalus pulchellus	+∞
Q4PM67	Ribosomal protein S16	Ixodes scapularis	+∞
Q86G63	40S ribosomal protein S11	Dermacentor variabilis	+∞
B7QLX5	Fetal alzheimer antigen, putative	Ixodes scapularis GN	+∞
B7Q4B1	ATP-dependent RNA helicase, putative	Ixodes scapularis GN	+∞
A0A023GPD3	Putative a2iv collagen	Amblyomma triste PE	+∞
C9W1P0	Ribosomal protein L21	Rhipicephalus sanguineus PE	+∞
V5H8L5	Putative m13 family peptidase	Ixodes ricinus PE	+∞
L7MMK9	Putative tick transposon (Fragment)	Rhipicephalus pulchellus PE	+∞
A0A023FJ36	40S ribosomal protein S4	Amblyomma cajennense PE	+∞
B7PDL3	Period circadian protein, putative	Ixodes scapularis GN	+∞
A0A023FMP5	Putative tick metalloprotease 1	Amblyomma cajennense PE	+∞
C9W1Q2	Protein disulfide isomerase	Rhipicephalus sanguineus PE	+∞
A0A023FS16	Uncharacterized protein	Amblyomma parvum PE	+∞
A0A023GBI5	Putative endoplasmic reticulum protein 29 (Fragment)	Amblyomma triste PE	+∞
L7M4P6	Uncharacterized protein	Rhipicephalus pulchellus PE	+∞
L7M3R5	Uncharacterized protein	Rhipicephalus pulchellus PE	+∞
A0A023FJD5	60S ribosomal protein L6	Amblyomma cajennense PE	+∞
L7MGA1	Putative tick salivary metalloprotease (Fragment)	Rhipicephalus pulchellus PE	+∞
L7LYU3	Uncharacterized protein	Rhipicephalus pulchellus PE	+∞
A0A023FJ23	Putative ribosomal protein (Fragment)	Amblyomma cajennense PE	+∞
A0A023FT54	Histone H4 (Fragment)	Amblyomma parvum PE	+∞
L7LTS5	Putative zinc finger protein	Rhipicephalus pulchellus PE	+∞
A0A023G714	Putative 40s ribosomal protein s19 (Fragment)	Amblyomma triste PE	+∞
L7M4V8	Putative helicase arip4	Rhipicephalus pulchellus PE	+∞
A0A023FEG2	Putative 40s ribosomal protein s10	Amblyomma cajennense PE	+∞
L7MIF1	Putative udp-gal:glucosylceramide beta-14-galactosyltransferase (Fragment)	Rhipicephalus pulchellus PE	+∞
B7PBG9	Putative uncharacterized protein	Ixodes scapularis GN	+∞
A6N9S3	Serum amyloid A protein-like	Ornithodoros parkeri PE	+∞
B7P7M2	Signal recognition particle subunit SRP72	Ixodes scapularis GN	+∞
Q2PGH4	Metalloprotease (Fragment)	Haemaphysalis longicornis GN	+∞
V5IGX3	Putative xaa-pro aminopeptidase (Fragment)	Ixodes ricinus PE	+∞
L7M1B8	Uncharacterized protein	Rhipicephalus pulchellus PE	+∞
A0A023GLX5	Putative carnitine o-acyltransferase cpt2/yat1	Amblyomma triste PE	+∞
L7MCV1	Putative conserved secreted protein (Fragment)	Rhipicephalus pulchellus PE	+∞
B7QIP4	4SNc-Tudor domain protein, putative	Ixodes scapularis	5.45943
G3MMG5	Proteasome subunit alpha type	Amblyomma maculatum	4
V5GQS5	Putative phd finger protein (Fragment)	Ixodes ricinus PE	3.90689
B7QGL8	Rad25/xp-B DNA repair helicase, putative	Ixodes scapularis GN	3.80735
L7MLQ7	Ubiquitin carboxyl-terminal hydrolase (Fragment)	Rhipicephalus pulchellus	3.75489
V5HHB3	Putative stretchin-mlck (Fragment)	Ixodes ricinus PE	3.70044
L7MFH0	Putative mitogen activated protein kinase kinase kinase 1 (Fragment)	Rhipicephalus pulchellus PE	3.70044
A0A023FHX7	Putative 60s ribosomal protein l7 (Fragment)	Amblyomma cajennense PE	3.70044
E2J6T5	40S ribosomal protein S8	Hyalomma marginatum rufipes PE	3.58496
A0A023FFQ8	40S ribosomal protein S6	Amblyomma cajennense PE	3.58496
V5GWA3	Putative rave regulator of v-atpase assembly complex subunit rav1/dmx protein (Fragment)	Ixodes ricinus PE	3.45943
G3MGR3	Putative uncharacterized protein (Fragment)	Amblyomma maculatum PE	3.32193
G3MKP4	Putative uncharacterized protein	Amblyomma maculatum	3.16993
B7Q8U4	Ski interacting protein, putative	Ixodes scapularis	3.08746
A5LHW0	Protein disulfide isomerase-1	Haemaphysalis longicornis GN	3.08746
L7MJQ3	Uncharacterized protein (Fragment)	Rhipicephalus pulchellus	3
B7PJR4	Protein-tyrosine-phosphatase	Ixodes scapularis	2.90689
L7MBL5	Putative amblyomma 40-33 family member	Rhipicephalus pulchellus	2.80735
L7MDP4	Putative nad/fad-utilizing protein possibly involved in translation (Fragment)	Rhipicephalus pulchellus	2.66297
L7M5V5	Non-specific protein-tyrosine kinase	Rhipicephalus pulchellus	2.64386
G3MQ25	Putative uncharacterized protein	Amblyomma maculatum	2.58496
B7PHI0	Putative uncharacterized protein	Ixodes scapularis GN	2.58496
G3MT63	Putative uncharacterized protein	Amblyomma maculatum PE	2.5025
L7M415	Putative cytochrome c oxidase assembly protein cox11	Rhipicephalus pulchellus	2.45943
L7M1Q7	Uncharacterized protein	Rhipicephalus pulchellus	2.41504
L7M5H0	Uncharacterized protein	Rhipicephalus pulchellus	2.41504
L7LUV3	Putative actin-related protein arp2/3 complex subunit	Rhipicephalus pulchellus	2.32193
L7LU08	Uncharacterized protein	Rhipicephalus pulchellus	2.22239
L7M6Y7	Putative fkbp13	Rhipicephalus pulchellus	2.08746
L7MAH3	Putative septin 7	Rhipicephalus pulchellus	2
L7M4A2	Uncharacterized protein	Rhipicephalus pulchellus	1.80735
L7LS09	Putative bitil peptide	Rhipicephalus pulchellus	1.48543
L7LU14	Putative vacuolar assembly/sorting protein vps8	Rhipicephalus pulchellus	1.45251
L7MHS4	Putative potassium channel modulatory factor 1 protein (Fragment)	Rhipicephalus pulchellus	1.44057
G3MN66	Putative uncharacterized protein	Amblyomma maculatum PE	1.43494
L7M9P7	Vacuolar protein sorting-associated protein 35	Rhipicephalus pulchellus	1.3505
L7M528	Putative paramyosin	Rhipicephalus pulchellus	1.29546
L7M065	Putative tick transposon	Rhipicephalus pulchellus	1.23704
L7M3G2	Putative dna replication licensing factor mcm5 component	Rhipicephalus pulchellus	1.23133
B7QJ55	Small nuclear ribonucleoprotein E, putative	Ixodes scapularis	1.20945
L7MF12	Putative hydroxymethylglutaryl-coa synthase (Fragment)	Rhipicephalus pulchellus	1.1304
L7LWL9	Putative mrna processing protein	Rhipicephalus pulchellus	0.95818
L7MJ41	Uncharacterized protein (Fragment)	Rhipicephalus pulchellus	0.925999
L7ME53	Putative 3-hydroxyacyl-coa dehydratase 2 (Fragment)	Rhipicephalus pulchellus	0.85561
L7M0R7	Putative ubiquitin ligase e3	Rhipicephalus pulchellus	0.813587
G3MI35	Putative uncharacterized protein (Fragment)	Amblyomma maculatum	0.798366
L7MA73	Uncharacterized protein	Rhipicephalus pulchellus	0.777608
L7M5A9	Putative alpha-2-macroglobulin receptor-associated protein	Rhipicephalus pulchellus	0.768674
L7LYA9	Putative tick transposon	Rhipicephalus pulchellus	0.61891
L7MK01	Uncharacterized protein (Fragment)	Rhipicephalus pulchellus	0.597241
L7M087	Uncharacterized protein	Rhipicephalus pulchellus	0.584963
L7M302	Putative four and a half lim protein 2	Rhipicephalus pulchellus	0.584963
L7M138	Putative this conserved domain family includes a large number	Rhipicephalus pulchellus	0.5025
L7MH88	Uncharacterized protein (Fragment)	Rhipicephalus pulchellus	0.217905
L7MK99	Putative tick transposon (Fragment)	Rhipicephalus pulchellus	0.179821
B0F457	Vitellogenin (Fragment)	Rhipicephalus microplus	-1.02466
A8WAA7	Vitellogenin-2	Dermacentor variabilis	-1.24883
L7M269	Structural maintenance of chromosomes protein	Rhipicephalus pulchellus	-1.27302
L7M711	Putative oligophrenin-1	Rhipicephalus pulchellus	-1.27302
L7M9Q3	Putative igf/kazal/ig domain-containing protein	Rhipicephalus pulchellus	-1.29698
Q5EG54	Vitellogenin	Dermacentor variabilis	-1.31654
L7M907	Putative myosin class v heavy chain	Rhipicephalus pulchellus	-1.33121
L7M4Q2	Putative actin binding protein	Rhipicephalus pulchellus	-1.46713
Q56CZ1	Yolk cathepsin (Fragment)	Rhipicephalus microplus	-1.66297
L7MB65	Putative sushi von willebrand factor type a protein	Rhipicephalus pulchellus	-1.67243
G3MHG2	Transketolase(Fragment)	Amblyomma maculatum	-1.70044
L7M1C8	Putative pallbearer	Rhipicephalus pulchellus	-1.74543
L7LRQ2	Putative 5'-3' exonuclease xrn1/kem1/sep1 involved in dna strand exchange and mrna turnover (Fragment)	Rhipicephalus pulchellus	-1.85798
L7MG43	Putative stretchin-mlck (Fragment)	Rhipicephalus pulchellus	-1.9386
L7M4T5	Uncharacterized protein	Rhipicephalus pulchellus	-1.974
L7M2H0	Putative camp-regulated guanine nucleotide exchange factor	Rhipicephalus pulchellus	-2.05063
G3MMI5	Putative uncharacterized protein	Amblyomma maculatum	-2.05889
L7MMH3	Putative tick transposon (Fragment)	Rhipicephalus pulchellus	-2.06413
L5KWT3	Uncharacterized protein	Pteropus alecto	-2.11548
B7PRY6	Golgi apparatus protein, putative (Fragment)	Ixodes scapularis	-2.1375
L7M6K7	Putative vacuolar protein-sorting protein	Rhipicephalus pulchellus	-2.1375
L7M0X0	Uncharacterized protein	Rhipicephalus pulchellus	-2.16993
L7M2D3	Uncharacterized protein	Rhipicephalus pulchellus	-2.16993
L7MHL9	Uncharacterized protein (Fragment)	Rhipicephalus pulchellus	-2.16993
B7QB69	Putative uncharacterized protein	Ixodes scapularis	-2.20163
L7M808	Uncharacterized protein	Rhipicephalus pulchellus	-2.20163
G3MM07	Putative uncharacterized protein	Amblyomma maculatum	-2.22239
L7MK92	Putative na+-independent cl/hco3 exchanger ae1 (Fragment)	Rhipicephalus pulchellus	-2.36923
L7LW70	Putative m13 family peptidase	Rhipicephalus pulchellus	-2.39232
Q26422	Limulus clotting factor C (FC)[Cleaved into: Limulus clotting factor C heavy chain; Limulus clotting factor C light chain; Limulus clotting factor C chain A; Limulus clotting factor C chain B]	Carcinoscorpius rotundicauda	-2.43296
L7LVN8	Putative apoptosis inhibitor 5/fibroblast growth factor 2-interacting factor 2	Rhipicephalus pulchellus	-2.45943
L7MJG1	Uncharacterized protein (Fragment)	Rhipicephalus pulchellus	-2.5025
L7MJL4	Putative histidyl-trna synthetase (Fragment)	Rhipicephalus pulchellus	-2.58496
B7P0N0	Cytochrome P450, putative (Fragment)	Ixodes scapularis	-2.63227
L7M658	Putative adenylate cyclase	Rhipicephalus pulchellus	-2.64386
L7MIC3	Putative cytosolic ca2+-dependent cysteine prote (Fragment)	Rhipicephalus pulchellus	-2.64386
G3MM86	Putative uncharacterized protein	Amblyomma maculatum	-2.66297
L7LUX6	Putative neural cell adhesion molecule	Rhipicephalus pulchellus	-2.73697
B7Q5X7	Vinculin, putative	Ixodes scapularis GN	-2.80735
Q2XW15	Glutathione peroxidase	Rhipicephalus microplus	-2.90689
L7MI74	Uncharacterized protein (Fragment)	Rhipicephalus pulchellus PE	-2.90689
V5GZN4	Putative histone-lysine n-methyltransferase setdb1 (Fragment)	Ixodes ricinus PE	-3
V5H1P0	Putative piezo-type mechanosensitive ion channel component 1	Ixodes ricinus PE	-3.08746
L7MCB7	Putative mg2+-dependent phosphodiesterase ttrap (Fragment)	Rhipicephalus pulchellus	-3.16993
L7M3W4	Putative tail-anchored protein insertion receptor wrb	Rhipicephalus pulchellus	-3.32193
A0A023FHI8	Putative alpha crystallins	Amblyomma cajennense PE	-3.32193
L7LRB1	Putative group ii salivary lipocalin	Rhipicephalus pulchellus	-3.39232
L7M4V3	Putative myosin phosphatase rho-interacting protein	Rhipicephalus pulchellus PE	-3.58496
B7PUK8	Clathrin heavy chain, putative (Fragment)	Ixodes scapularis	-3.70044
L7LXL4	Inosine-5'-monophosphate dehydrogenase	Rhipicephalus pulchellus PE	-3.70044
B7PWE5	Acetylcholinesterase, putative	Ixodes scapularis	-3.80735
L7MKM1	Putative 52 kd repressor of inhibitor of protein kinase (Fragment)	Rhipicephalus pulchellus PE	-4
L7MAQ8	Putative exosomal 3'-5' exoribonuclease complex subunit (Fragment)	Rhipicephalus pulchellus	-4.08746
L7MLF8	Putative p-type atpase (Fragment)	Rhipicephalus pulchellus	-4.16993
B7PXJ7	E3 ubiquitin ligase, putative	Ixodes scapularis	-4.24793
B7P9U9	AamEcRA1, putative	Ixodes scapularis	-4.39232
L7M9R1	Uncharacterized protein	Rhipicephalus pulchellus	-4.39232
L7LZT8	Putative amino acid transporter	Rhipicephalus pulchellus	-4.70044
L7M3L2	Putative polytene chromosome	Rhipicephalus pulchellus	-4.75489
A2V728	Glutamine: fructose-6-phosphate aminotransferase	Haemaphysalis longicornis	-∞
B6VE08	Neuroendocrine protein 7B2	Dermacentor variabilis	-∞
B7P0R0	Ribosomal protein L27, putative (Fragment)	Ixodes scapularis	-∞
B7P1Q6	Putative uncharacterized protein	Ixodes scapularis	-∞
B7P2D2	Cleavage and polyadenylation specificity factor, putative	Ixodes scapularis	-∞
B7P4I6	Putative uncharacterized protein	Ixodes scapularis	-∞
B7P6W2	Adenylate cyclase, putative	Ixodes scapularis	-∞
B7P8W8	Phosphatidylinositol transfer protein SEC14, putative	Ixodes scapularis	-∞
B7PCR2	S-adenosylhomocysteine hydrolase, putative	Ixodes scapularis	-∞
B7PEY0	AP-2 complex subunit alpha-1, putative	Ixodes scapularis	-∞
B7PND1	Glucose-6-phosphate translocase, putative	Ixodes scapularis	-∞
B7PTP7	Plexin A, putative	Ixodes scapularis	-∞
B7PU50	3-hydroxyanthranilate 3,4-dioxygenase, putative	Ixodes scapularis	-∞
B7PZN4	Putative uncharacterized protein	Ixodes scapularis	-∞
B7Q0V5	Cytoplasmic dynein 1 intermediate chain, putative (Fragment)	Ixodes scapularis	-∞
B7Q218	Cell division protein, putative	Ixodes scapularis	-∞
B7Q4Q4	ADP/ATP translocase, putative	Ixodes scapularis	-∞
B7Q524	Protein tyrosine phosphatase, putative	Ixodes scapularis	-∞
B7Q5R1	Vacuolar protein-sorting protein, putative	Ixodes scapularis	-∞
B7Q630	Coiled-coil domain-containing protein MTMR15, putative	Ixodes scapularis	-∞
B7Q7T2	Putative uncharacterized protein	Ixodes scapularis	-∞
B7Q872	Chondroitin 4-sulfotransferase, putative	Ixodes scapularis	-∞
B7QCC0	Protein LCHN, putative (Fragment)	Ixodes scapularis	-∞
B7QFK5	Putative uncharacterized protein	Ixodes scapularis	-∞
B7QG52	Dihydropyrimidine dehydrogenase, putative	Ixodes scapularis	-∞
B7QMM0	Serine/threonine protein kinase, putative	Ixodes scapularis	-∞
B7QNB5	Putative uncharacterized protein	Ixodes scapularis	-∞
E7D1D2	Uridine phosphorylase (Fragment)	Latrodectus hesperus	-∞
F0J9E1	Guanine nucleotide-binding protein subunit gamma (Fragment)	Amblyomma variegatum	-∞
G3MGK7	Putative uncharacterized protein (Fragment)	Amblyomma maculatum	-∞
G3MGT2	Putative uncharacterized protein (Fragment)	Amblyomma maculatum	-∞
G3MHH9	Putative uncharacterized protein (Fragment)	Amblyomma maculatum	-∞
G3MHK4	Putative uncharacterized protein (Fragment)	Amblyomma maculatum	-∞
G3MHL0	Putative uncharacterized protein (Fragment)	Amblyomma maculatum	-∞
G3MJI3	Putative uncharacterized protein (Fragment)	Amblyomma maculatum	-∞
G3MKD9	Putative uncharacterized protein	Amblyomma maculatum	-∞
G3MML9	Putative uncharacterized protein	Amblyomma maculatum	-∞
G3MMQ5	Putative uncharacterized protein	Amblyomma maculatum	-∞
G3MNC4	Putative uncharacterized protein	Amblyomma maculatum	-∞
G3MNE8	Putative uncharacterized protein	Amblyomma maculatum	-∞
G3MNF5	Proteasome subunit alpha type	Amblyomma maculatum	-∞
G3MPQ7	Putative uncharacterized protein	Amblyomma maculatum	-∞
G3MQN0	Putative uncharacterized protein	Amblyomma maculatum	-∞
G3MR73	Putative uncharacterized protein	Amblyomma maculatum	-∞
G3MR88	Putative uncharacterized protein	Amblyomma maculatum	-∞
G3MRA2	Putative uncharacterized protein	Amblyomma maculatum	-∞
G3MRL4	Putative uncharacterized protein	Amblyomma maculatum	-∞
L7LQQ5	Putative spenito	Rhipicephalus pulchellus	-∞
L7LST6	Uncharacterized protein	Rhipicephalus pulchellus	-∞
L7LSU5	Uncharacterized protein	Rhipicephalus pulchellus	-∞
L7LSW9	Putative oligopeptidase	Rhipicephalus pulchellus	-∞
L7LTM4	Uncharacterized protein	Rhipicephalus pulchellus	-∞
L7LUL1	Uncharacterized protein	Rhipicephalus pulchellus	-∞
L7LV56	Putative ig domain protein	Rhipicephalus pulchellus	-∞
L7LV74	Uncharacterized protein	Rhipicephalus pulchellus	-∞
L7LW45	Uncharacterized protein	Rhipicephalus pulchellus	-∞
L7LWU9	Putative b-cell cll/lymphoma 7 protein family member a	Rhipicephalus pulchellus	-∞
L7LWX6	Putative alpha-13-mannosyltransferase	Rhipicephalus pulchellus	-∞
L7LXK5	Putative actin-binding lim zn-finger protein limatin involved in axon guidance	Rhipicephalus pulchellus	-∞
L7LXL2	Uncharacterized protein	Rhipicephalus pulchellus	-∞
L7LXV4	Putative extracellular protein sel-1	Rhipicephalus pulchellus	-∞
L7LXW3	Uncharacterized protein	Rhipicephalus pulchellus	-∞
L7LY15	Putative rna-binding protein larp/sro9	Rhipicephalus pulchellus	-∞
L7LYK3	Putative cdc2-related protein kinase	Rhipicephalus pulchellus	-∞
L7LYS2	Putative ccr4-not transcription complex subunit 4	Rhipicephalus pulchellus	-∞
L7LYY3	Uncharacterized protein	Rhipicephalus pulchellus	-∞
L7LYZ3	Putative gdp-fucose transporter	Rhipicephalus pulchellus	-∞
L7LZ18	Uncharacterized protein	Rhipicephalus pulchellus	-∞
L7LZP1	Putative zinc finger protein (Fragment)	Rhipicephalus pulchellus	-∞
L7LZY6	Putative glucose-repressible alcohol dehydrogenase transcriptional effector ccr4	Rhipicephalus pulchellus	-∞
L7M0C6	Glucosylceramidase	Rhipicephalus pulchellus	-∞
L7M0M0	Putative transcription initiation factor tfii-d component	Rhipicephalus pulchellus	-∞
L7M1F5	Putative e3 ubiquitin ligase	Rhipicephalus pulchellus	-∞
L7M1H4	Putative cyclin-dependent kinase inhibitor	Rhipicephalus pulchellus	-∞
L7M221	Putative molecular chaperone dnaj superfamily	Rhipicephalus pulchellus	-∞
L7M2K9	Putative g protein-coupled seven transmembrane receptor	Rhipicephalus pulchellus	-∞
L7M2U6	Uncharacterized protein	Rhipicephalus pulchellus	-∞
L7M2Z7	Putative rna-binding protein	Rhipicephalus pulchellus	-∞
L7M340	Ubiquitin carboxyl-terminal hydrolase	Rhipicephalus pulchellus	-∞
L7M359	Putative syntaxin 1a	Rhipicephalus pulchellus	-∞
L7M3F6	Uncharacterized protein	Rhipicephalus pulchellus	-∞
L7M3S2	Putative elongation factor 1 beta	Rhipicephalus pulchellus	-∞
L7M3U2	Uncharacterized protein	Rhipicephalus pulchellus	-∞
L7M463	Uncharacterized protein	Rhipicephalus pulchellus	-∞
L7M4B9	Putative heat shock-related protein	Rhipicephalus pulchellus	-∞
L7M4V2	Putative dna-binding protein	Rhipicephalus pulchellus	-∞
L7M4Y8	Putative zn-dependent peptidase	Rhipicephalus pulchellus	-∞
L7M567	Putative atp-dependent rna helicase	Rhipicephalus pulchellus	-∞
L7M5D2	Putative brain-enriched guanylate kinase-associated protein	Rhipicephalus pulchellus	-∞
L7M6I2	Uncharacterized protein	Rhipicephalus pulchellus	-∞
L7M6I9	Uncharacterized protein	Rhipicephalus pulchellus	-∞
L7M6Q8	Putative peptidyl-prolyl cis-trans isomerase	Rhipicephalus pulchellus	-∞
L7M6W7	Putative transcriptional regulating factor 1	Rhipicephalus pulchellus	-∞
L7M744	Uncharacterized protein	Rhipicephalus pulchellus	-∞
L7M759	Uncharacterized protein	Rhipicephalus pulchellus	-∞
L7M778	Putative phosphatidylinositol 3-phosphate 3-phosphatase myotubularin mtm1	Rhipicephalus pulchellus	-∞
L7M7D0	Putative ap-2 complex subunit alpha	Rhipicephalus pulchellus	-∞
L7M7H1	Putative n6-adenine rna methylase	Rhipicephalus pulchellus	-∞
L7M7N4	Uncharacterized protein	Rhipicephalus pulchellus	-∞
L7M7U3	Putative exocyst complex component 7	Rhipicephalus pulchellus	-∞
L7M7Z3	Ubiquitin carboxyl-terminal hydrolase	Rhipicephalus pulchellus	-∞
L7M892	Uncharacterized protein	Rhipicephalus pulchellus	-∞
L7M8B0	Ribosome biogenesis protein WDR12 homolog	Rhipicephalus pulchellus	-∞
L7M8H3	Putative ufm1-specific protease 2	Rhipicephalus pulchellus	-∞
L7M8L1	Putative gdp-l-fucose synthetase	Rhipicephalus pulchellus	-∞
L7M8U7	Uncharacterized protein	Rhipicephalus pulchellus	-∞
L7M928	Uncharacterized protein	Rhipicephalus pulchellus	-∞
L7MA05	Putative selenoprotein o	Rhipicephalus pulchellus	-∞
L7MA28	Uncharacterized protein	Rhipicephalus pulchellus	-∞
L7MA87	Putative hephaestus	Rhipicephalus pulchellus	-∞
L7MAA6	Uncharacterized protein	Rhipicephalus pulchellus	-∞
L7MAJ5	Uncharacterized protein	Rhipicephalus pulchellus	-∞
L7MBU9	Putative tick transposon (Fragment)	Rhipicephalus pulchellus	-∞
L7MCU3	Putative transducin-like enhancer of split protein (Fragment)	Rhipicephalus pulchellus	-∞
L7MDY2	Putative histone deacetylase complex catalytic component rpd3 (Fragment)	Rhipicephalus pulchellus	-∞
L7MF83	Uncharacterized protein (Fragment)	Rhipicephalus pulchellus	-∞
L7MFL0	Putative heat shock transcription factor (Fragment)	Rhipicephalus pulchellus	-∞
L7MFX6	Putative zinc finger protein (Fragment)	Rhipicephalus pulchellus	-∞
L7MGI0	Uncharacterized protein (Fragment)	Rhipicephalus pulchellus	-∞
L7MGT9	Putative rpt3 (Fragment)	Rhipicephalus pulchellus	-∞
L7MGU3	Putative nlr family card domain protein (Fragment)	Rhipicephalus pulchellus	-∞
L7MH65	Putative ap2-associated protein kinase 1 (Fragment)	Rhipicephalus pulchellus	-∞
L7MHF9	Uncharacterized protein (Fragment)	Rhipicephalus pulchellus	-∞
L7MIA2	Putative integral to membrane (Fragment)	Rhipicephalus pulchellus	-∞
L7MIF4	Putative lanthionine synthetase c-like protein 1 (Fragment)	Rhipicephalus pulchellus	-∞
L7MJB1	Putative bromodomain adjacent to zinc finger domain protein 2b (Fragment)	Rhipicephalus pulchellus	-∞
L7MJI0	Putative bud13 (Fragment)	Rhipicephalus pulchellus	-∞
L7MJJ5	Putative surfeit locus protein 6 (Fragment)	Rhipicephalus pulchellus	-∞
L7MJX9	Putative nad+ adp-ribosyltransferase-3-like protein strongylocentrotus purpuratus (Fragment)	Rhipicephalus pulchellus	-∞
L7MK42	Putative integral membrane ankyrin-repeat protein kidins220 protein kinase d substrate (Fragment)	Rhipicephalus pulchellus	-∞
L7MK62	Putative transcriptional intermediary factor 2 (Fragment)	Rhipicephalus pulchellus	-∞
L7MKQ6	Putative transcriptional regulator (Fragment)	Rhipicephalus pulchellus	-∞
L7MLL4	Uncharacterized protein (Fragment)	Rhipicephalus pulchellus	-∞
L7MLP8	Putative tick transposon (Fragment)	Rhipicephalus pulchellus	-∞
L7MMX5	Uncharacterized protein (Fragment)	Rhipicephalus pulchellus	-∞
Q09JJ5	Transcriptional co-repressor component	Argas monolakensis	-∞
Q71U36	Tubulin alpha-1A chain (Alpha-tubulin 3) (Tubulin B-alpha-1) (Tubulin alpha-3 chain)	Homo sapiens	-∞
L7LSD2	Putative chaperonin complex component tcp-1 beta subunit cct2	Rhipicephalus pulchellus PE	-∞
B7Q644	Ubiquitin conjugating enzyme interacting protein, putative (Fragment)	Ixodes scapularis GN	-∞
V5HMJ7	Putative kinesin-like protein (Fragment)	Ixodes ricinus PE	-∞
B7PVC0	Dual oxidase 1, putative	Ixodes scapularis GN	-∞
L7LVG2	Uncharacterized protein	Rhipicephalus pulchellus PE	-∞
V5HQC5	Putative vigilin	Ixodes ricinus PE	-∞
L7M6Q7	Uncharacterized protein	Rhipicephalus pulchellus PE	-∞
V5IIA4	Protein dimerization (Fragment)	Ixodes ricinus PE	-∞
B7P5B3	U5 snRNP-specific protein, putative (Fragment)	Ixodes scapularis GN	-∞
B7QCA1	RNA-binding translational regulator IRP, putative (Fragment)	Ixodes scapularis GN	-∞
L7LWQ3	Uncharacterized protein	Rhipicephalus pulchellus PE	-∞
G3MGC1	Putative uncharacterized protein (Fragment)	Amblyomma maculatum PE	-∞
A0A023GAK9	Putative tick metalloprotease 1	Amblyomma triste PE	-∞
L7LTR9	Putative tick salivary metalloprotease	Rhipicephalus pulchellus PE	-∞
L7M9I8	Uncharacterized protein	Rhipicephalus pulchellus PE	-∞
L7LTS6	Putative tick salivary metalloprotease	Rhipicephalus pulchellus PE	-∞

## Sheet: Column description
Column description
Uniprot	Identifier for the protein (Uniprot accession)
Description	Description of the protein
Organism	Organism in which protein was identified
log2(Fold_change)	Differential expression (infected to uninfected log2-fold change threshold)

## Sheet: UNIPROT
Tick proteins identified after search against Uniprot DB Ixodida-Bos taurus-Babesia. FDR < 5%, ≥ 2 peptides per protein
Uniprot	Description	Tick species	PSMs Control 1	PSMs Control 2	PSMs Infected 1	PSMs Infected 2
A0A034WWF8	Vitellogenin 3	Rhipicephalus microplus PE	219	170	79	69
A0A034WTV5	Vitellogenin 1	Rhipicephalus microplus PE	207	140	65	61
Q17174	GP80 (Fragment)	Rhipicephalus microplus PE	167	114	48	53
V5HG79	Putative short stop (Fragment)	Ixodes ricinus PE	20	27	12	26
B7Q381	Putative uncharacterized protein	Ixodes scapularis GN	16	18	12	18
L7MDQ8	ATP synthase subunit beta (Fragment)	Rhipicephalus pulchellus PE	29	43	22	26
G3MHD3	ATP synthase subunit beta (Fragment)	Amblyomma maculatum PE	27	40	21	24
L7M940	Putative megalin	Rhipicephalus pulchellus PE	14	14	0	16
L7MFA2	Putative ca2+-binding actin-bundling protein (Fragment)	Rhipicephalus pulchellus PE	11	24	16	15
A0A023FIQ0	Putative mitochondrial adp/atp carrier	Amblyomma cajennense PE	23	30	33	24
V5IFY7	Putative mitochondrial adp/atp carrier	Ixodes ricinus PE	20	27	29	24
L7MAA0	ATP synthase subunit alpha	Rhipicephalus pulchellus PE	32	36	30	29
A0A023FZX4	ATP synthase subunit alpha (Fragment)	Amblyomma parvum PE	30	36	28	29
V9NJJ9	Vitellogenin 2	Amblyomma hebraeum GN	48	43	30	26
L7MK44	Uncharacterized protein (Fragment)	Rhipicephalus pulchellus PE	11	24	14	14
A0A023GL78	Putative mitochondrial adp/atp carrier (Fragment)	Amblyomma triste PE	22	27	29	22
Q8MWP3	Calreticulin	Rhipicephalus microplus PE	7	12	14	18
L7MIE2	Putative nidogen (Fragment)	Rhipicephalus pulchellus PE	11	8	4	18
Q5EG54	Vitellogenin	Dermacentor variabilis GN	61	40	21	18
L7MJ57	Putative prolow-density lipoprotein receptor-related protein 1 (Fragment)	Rhipicephalus pulchellus PE	18	16	12	15
L7MGC0	Uncharacterized protein (Fragment)	Rhipicephalus pulchellus PE	9	18	13	12
G3MF27	Putative uncharacterized protein	Amblyomma maculatum PE	6	10	13	12
E4W3Z2	Heat shock 70 kDa protein 5	Haemaphysalis longicornis PE	8	13	12	12
B7PYK1	Trichohyalin, putative	Ixodes scapularis GN	5	0	8	12
B7QH00	General transcription factor IIIC, polypeptide 1, alpha 220kDa, putative	Ixodes scapularis GN	10	9	7	13
L7LQD3	Putative polytil protein	Rhipicephalus pulchellus PE	14	8	5	14
B7PKY0	Putative uncharacterized protein	Ixodes scapularis GN	7	6	4	12
V5GYS7	Putative spectrin beta chain	Ixodes ricinus PE	10	17	13	11
B7Q4Q3	ADP/ATP translocase, putative	Ixodes scapularis GN	15	23	24	21
B7P6X9	Hemolectin, putative (Fragment)	Ixodes scapularis GN	4	6	16	11
L7MHS5	Putative dystrophin (Fragment)	Rhipicephalus pulchellus PE	10	9	11	13
B7PEN4	Heat shock protein, putative	Ixodes scapularis GN	5	10	12	11
K4Q301	Target of rapamycin	Haemaphysalis longicornis GN	8	10	6	11
B7P403	Type II transmembrane protein, putative	Ixodes scapularis GN	4	7	8	11
B7QF96	Putative uncharacterized protein	Ixodes scapularis GN	10	8	6	12
L7MMY2	ATP synthase subunit alpha (Fragment)	Rhipicephalus pulchellus PE	25	34	24	25
L7MII0	Putative dolichyl-diphosphooligosaccharide--protein glycosyltransferase subunit 2 (Fragment)	Rhipicephalus pulchellus PE	10	16	19	11
L7MFT8	Putative secreted mucin muc17 (Fragment)	Rhipicephalus pulchellus PE	10	8	11	12
V5I001	Putative myosin class i heavy chain	Ixodes ricinus PE	8	5	14	13
A0A023GNW2	Putative sodium/potassium-transporting atpase subunit alpha	Amblyomma triste PE	15	22	11	10
E7CF11	Mitochondrial volatge dependent anion-selective channel (Fragment)	Rhipicephalus microplus GN	17	23	16	12
L7MFP4	Putative thyroid hormone receptor-associated protein complex subunit (Fragment)	Rhipicephalus pulchellus PE	0	8	5	10
B7PGV5	Putative uncharacterized protein	Ixodes scapularis GN	8	11	5	13
A0A023GLZ1	Vacuolar protein sorting-associated protein 35	Amblyomma triste PE	0	0	0	10
A0A023FP30	Putative sodium/potassium-transporting atpase subunit alpha	Amblyomma cajennense PE	14	20	11	9
B7P9E4	Na+/K+ ATPase, alpha subunit, putative (Fragment)	Ixodes scapularis GN	12	19	10	9
B7QKP6	Type 3 inositol 1,4,5-trisphosphate receptor, putative	Ixodes scapularis GN	5	10	11	10
V5GZ45	Putative heparan sulfate proteoglycan 2 (Fragment)	Ixodes ricinus PE	4	11	9	10
L7MF46	Uncharacterized protein (Fragment)	Rhipicephalus pulchellus PE	4	7	8	11
B7QLX5	Fetal alzheimer antigen, putative	Ixodes scapularis GN	0	0	8	10
A0A034WZ42	Hemelipoprotein HeLp (Fragment)	Rhipicephalus microplus PE	27	18	8	10
A0A023FM70	Putative heat shock protein (Fragment)	Amblyomma cajennense PE	5	18	8	9
L7LXF9	Putative vacuolar protein	Rhipicephalus pulchellus PE	5	6	5	9
B7PTN2	Putative uncharacterized protein	Ixodes scapularis GN	4	8	4	10
B7PD89	Peroxisome proliferator-activated receptor binding protein, putative	Ixodes scapularis GN	3	4	2	11
L7MCE7	Putative mucin-17 (Fragment)	Rhipicephalus pulchellus PE	9	10	15	10
L7LXL6	Putative a-kinase anchor protein 9	Rhipicephalus pulchellus PE	6	12	12	8
G3MM27	Putative uncharacterized protein	Amblyomma maculatum PE	16	17	13	9
A0A023GNE6	Putative chaperonin subunit ixodes scapularis chaperonin subunit	Amblyomma triste PE	3	5	9	10
L7MBH3	Putative dna-directed rna polymer (Fragment)	Rhipicephalus pulchellus PE	13	10	10	8
A0A023FPT7	Putative heat shock protein 90	Amblyomma cajennense PE	7	10	7	9
A5LHW1	Protein disulfide-isomerase	Haemaphysalis longicornis GN	4	11	10	10
A0A023GD75	Protein disulfide-isomerase (Fragment)	Amblyomma triste PE	0	5	7	8
V5HG89	ATP synthase subunit beta (Fragment)	Ixodes ricinus PE	16	21	8	11
V5HWF9	Putative extracellular matrix glycoprotein laminin subunit beta (Fragment)	Ixodes ricinus PE	10	10	6	12
L7MGP1	Uncharacterized protein (Fragment)	Rhipicephalus pulchellus PE	5	8	6	9
L7MEG0	Putative heat shock protein (Fragment)	Rhipicephalus pulchellus PE	6	5	6	12
L7LW69	Putative sister chromatid cohesion protein scc2/nipped-b	Rhipicephalus pulchellus PE	8	6	5	8
L7M6F3	Putative beta-spectrin	Rhipicephalus pulchellus PE	7	8	7	11
A0A023FLP4	Elongation factor 1-alpha (Fragment)	Amblyomma cajennense PE	9	6	7	11
L7MBQ7	Putative plexins functional semaphorin receptor (Fragment)	Rhipicephalus pulchellus PE	4	5	6	10
L7MEW9	Putative microtubule-associated protein (Fragment)	Rhipicephalus pulchellus PE	4	6	7	10
V5IJE7	Putative zinc finger protein 91 (Fragment)	Ixodes ricinus PE	10	0	5	9
L7MJ63	Putative talin (Fragment)	Rhipicephalus pulchellus PE	0	13	4	8
V5HSQ4	Putative titin (Fragment)	Ixodes ricinus PE	10	11	5	11
Q8I6X6	Notch-like protein	Rhipicephalus microplus GN	3	5	4	10
L7MDP3	Putative rrna processing protein rrp5 (Fragment)	Rhipicephalus pulchellus PE	4	0	4	8
L7M2N3	Putative rna helicase brr2 dead-box superfamily	Rhipicephalus pulchellus PE	9	11	4	8
V5HV56	Uncharacterized protein (Fragment)	Ixodes ricinus PE	2	5	4	9
B7PVS0	Brefeldin A-inhibited guanine nucleotide-exchange protein, putative	Ixodes scapularis GN	4	0	3	8
G3MH89	Putative uncharacterized protein (Fragment)	Amblyomma maculatum PE	3	3	0	9
L7LSS3	Putative nucleosome remodeling factor subunit	Rhipicephalus pulchellus PE	0	7	13	7
B7Q4Q4	ADP/ATP translocase, putative	Ixodes scapularis GN	12	18	18	14
A0A023GMF4	Putative beta-spectrin (Fragment)	Amblyomma triste PE	5	8	11	7
B7PSH8	Vacuolar protein-sorting protein, putative	Ixodes scapularis GN	7	7	12	7
Q5D579	Actin (Fragment)	Ixodes ricinus PE	21	17	17	7
Q6X4W3	Actin	Haemaphysalis longicornis GN	20	16	17	7
A0A023FJS3	Putative ribosomal protein (Fragment)	Amblyomma cajennense PE	0	5	11	9
B7QM86	Talin, putative	Ixodes scapularis GN	10	0	9	7
L7LV27	Putative histone acetyltransferase saga trrap/tra1 component pi-3 kinase superfamily	Rhipicephalus pulchellus PE	7	10	10	7
L7MFQ9	Uncharacterized protein (Fragment)	Rhipicephalus pulchellus PE	11	10	10	7
V5HMN6	Putative translational activator gcn1 (Fragment)	Ixodes ricinus PE	8	7	8	7
B7PT11	LIN-12 protein, putative	Ixodes scapularis GN	8	4	12	8
B7QLS6	Putative uncharacterized protein	Ixodes scapularis GN	0	5	9	8
A0SHR2	Protein disulfide-isomerase	Amblyomma variegatum PE	7	13	10	9
L7M707	Putative discs large log 5a	Rhipicephalus pulchellus PE	5	6	8	7
B7Q3Y1	RNA recognition motif protein, putative	Ixodes scapularis GN	9	9	6	8
L7M5T7	Uncharacterized protein	Rhipicephalus pulchellus PE	10	6	6	10
L7MIA0	Uncharacterized protein (Fragment)	Rhipicephalus pulchellus PE	5	7	7	8
G3MM62	Putative uncharacterized protein	Amblyomma maculatum PE	5	8	7	10
A0A034WXE0	Heat shock protein 70 1	Rhipicephalus microplus PE	5	17	6	7
B7Q031	RNA binding protein, putative	Ixodes scapularis GN	6	4	6	9
V5HVM9	Putative myosin class ii heavy chain	Ixodes ricinus PE	4	4	5	8
L7MGR2	Putative low-density lipoprotein receptor (Fragment)	Rhipicephalus pulchellus PE	2	4	7	7
B7P794	Microtubule-associated protein CP224, putative (Fragment)	Ixodes scapularis GN	6	3	5	7
L7LX93	Putative tick transposon	Rhipicephalus pulchellus PE	8	10	4	7
L7MEL2	Putative myosin (Fragment)	Rhipicephalus pulchellus PE	6	8	4	7
V5IFL3	Putative deah-box rna helicase (Fragment)	Ixodes ricinus PE	4	11	5	8
A0A023FLM6	Protein disulfide-isomerase (Fragment)	Amblyomma cajennense PE	0	7	4	7
L7M0C4	Putative rabconnectin-3b	Rhipicephalus pulchellus PE	4	0	4	7
B7PRE8	TATA element modulatory factor, putative	Ixodes scapularis GN	3	0	4	7
B7QDK0	E1A-binding protein p400, putative (Fragment)	Ixodes scapularis GN	5	7	4	7
A0A023FS80	Putative karyopherin importin beta 3	Amblyomma parvum PE	0	7	4	8
V5H340	Putative vitellogenin-1	Ixodes ricinus PE	7	4	3	10
L7M1N4	Putative heat shock protein	Rhipicephalus pulchellus PE	6	7	3	8
B7QGG7	Putative uncharacterized protein	Ixodes scapularis GN	3	4	3	7
L7M5V5	Uncharacterized protein	Rhipicephalus pulchellus PE	2	0	3	8
V5HKW8	Putative serine/threonine protein kinase (Fragment)	Ixodes ricinus PE	4	4	2	8
A0A023GGN6	Putative karyopherin importin beta 3	Amblyomma triste PE	2	11	1	8
E1CAX9	Vitellogenin-1	Haemaphysalis longicornis GN	4	0	2	7
L7LXL1	Putative translational activator gcn1 translational activator gcn1	Rhipicephalus pulchellus PE	0	7	0	7
L7LSG5	Putative tick transposon	Rhipicephalus pulchellus PE	0	6	0	7
A0A023GFL2	Putative asparagine synthase	Amblyomma triste PE	0	6	0	7
G3MKB4	Putative uncharacterized protein	Amblyomma maculatum PE	0	4	0	10
A0A023FJV5	Putative nadp-dependent isocitrate dehydrogenase (Fragment)	Amblyomma cajennense PE	0	2	0	10
L7M5K6	Putative ca2+-binding actin-bundling protein	Rhipicephalus pulchellus PE	5	0	0	8
L7MHS2	Putative zinc finger protein (Fragment)	Rhipicephalus pulchellus PE	3	0	0	7
A0A023FZQ0	Putative nadp-dependent isocitrate dehydrogenase (Fragment)	Amblyomma parvum PE	0	0	0	10
A0A023GKA1	Isocitrate dehydrogenase [NADP]	Amblyomma triste PE	0	0	0	10
L7M4U5	DNA polymerase	Rhipicephalus pulchellus PE	7	12	17	6
V5HIN7	Putative dyneins heavy chain (Fragment)	Ixodes ricinus PE	8	13	11	7
L7M579	Dolichyl-diphosphooligosaccharide--protein glycosyltransferase 48 kDa subunit	Rhipicephalus pulchellus PE	9	13	11	7
V5HJX1	Putative 60 kDa heat shock protein mitochondrial	Ixodes ricinus PE	7	10	12	11
B7PEV0	Chaperonin subunit, putative	Ixodes scapularis GN	6	10	12	11
V5H9H1	Putative mam domain protein	Ixodes ricinus PE	3	6	10	6
V5I4B8	Putative myosin class i heavy chain	Ixodes ricinus PE	7	6	10	6
L7MAJ9	Uncharacterized protein (Fragment)	Rhipicephalus pulchellus PE	0	15	13	10
L7MLL4	Uncharacterized protein (Fragment)	Rhipicephalus pulchellus PE	6	6	9	6
A5LHW0	Protein disulfide isomerase-1	Haemaphysalis longicornis GN	0	2	11	6
B7QFZ7	Thrombospondin-like protein, putative	Ixodes scapularis GN	7	11	9	8
B7P1K3	SMC protein, putative (Fragment)	Ixodes scapularis GN	6	9	9	6
L7MEQ6	Putative remodeling and spacing factor 1 (Fragment)	Rhipicephalus pulchellus PE	11	7	8	6
B7P3N5	Ran-binding protein (RanBP), putative	Ixodes scapularis GN	6	6	8	8
L7M912	Putative mucin-17	Rhipicephalus pulchellus PE	7	5	10	15
G3MHF7	Putative uncharacterized protein (Fragment)	Amblyomma maculatum PE	0	4	9	7
V5HE67	Putative animal-type fatty acid synthase	Ixodes ricinus PE	11	15	8	6
L7LYF9	Putative deah-box rna helicase	Rhipicephalus pulchellus PE	6	5	7	6
L7M1C4	Putative rugose	Rhipicephalus pulchellus PE	7	5	10	8
V5HHB3	Putative stretchin-mlck (Fragment)	Ixodes ricinus PE	0	1	7	6
A0A023FDH8	Putative dolichyl-diphosphooligosaccharide--protein glycosyltransferase subunit 2 (Fragment)	Amblyomma cajennense PE	4	9	9	7
L7LTR7	Uncharacterized protein	Rhipicephalus pulchellus PE	0	8	7	6
L7LXE2	Putative snf2 family domain protein	Rhipicephalus pulchellus PE	9	8	8	6
B7Q057	HEAT repeat-containing protein	Ixodes scapularis GN	5	6	6	6
L7M952	Uncharacterized protein	Rhipicephalus pulchellus PE	5	10	7	8
B7Q0T5	Mitogen activated protein kinase kinase kinase 1, MAPKKK1, MEKK1, putative (Fragment)	Ixodes scapularis GN	6	5	7	6
G3MM45	Putative uncharacterized protein	Amblyomma maculatum PE	4	6	8	6
L7MI90	Uncharacterized protein (Fragment)	Rhipicephalus pulchellus PE	3	5	7	7
V5HQS8	Putative endocytosis protein rme-8 (Fragment)	Ixodes ricinus PE	0	6	8	7
A0A023GGB5	Putative kinesin-like protein	Amblyomma triste PE	5	3	7	7
V5H852	Putative thyroid hormone-induced protein b	Ixodes ricinus PE	1	3	6	7
L7MLP2	Putative syntaxin-binding protein 2 (Fragment)	Rhipicephalus pulchellus PE	0	5	10	10
V5HC22	40S ribosomal protein S6	Ixodes ricinus PE	2	1	6	6
V5HIS1	Putative 40s ribosomal protein s3-a	Ixodes ricinus PE	0	2	6	6
E2J6T5	40S ribosomal protein S8	Hyalomma marginatum rufipes PE	0	1	6	6
V5HR98	Putative collagen alpha-2iv chain (Fragment)	Ixodes ricinus PE	6	0	6	10
B7Q4B1	ATP-dependent RNA helicase, putative	Ixodes scapularis GN	0	0	8	9
V9NJZ2	Vitellogenin 1	Amblyomma hebraeum GN	30	20	7	7
B7PAR6	Heat shock protein, putative	Ixodes scapularis GN	5	15	5	6
B7QBZ6	DNA binding protein Mcm	Ixodes scapularis GN	3	13	5	7
A0A023FIH3	Putative mitochondrial phosphate carrier protein (Fragment)	Amblyomma cajennense PE	5	7	8	6
A0A023FIB9	Putative mitochondrial chaperonin (Fragment)	Amblyomma cajennense PE	2	22	7	20
L7M5Q0	Uncharacterized protein	Rhipicephalus pulchellus PE	4	4	5	7
Q64K98	Calreticulin	Amblyomma geayi PE	5	6	6	9
L7LXA7	Putative transferring phosphorus-containing groups	Rhipicephalus pulchellus PE	2	2	6	6
V5I066	Putative heteroproteinous nuclear ribonucleoprotein u-like 1 (Fragment)	Ixodes ricinus PE	1	1	5	6
A0A023GPD3	Putative a2iv collagen	Amblyomma triste PE	0	0	5	6
L7LRQ3	DNA-directed RNA polymerase	Rhipicephalus pulchellus PE	11	12	4	6
V5HJ99	Putative multifunctional pyrimidine synthesis protein cad includes carbamoyl-phosphate synthetase (Fragment)	Ixodes ricinus PE	5	10	5	6
A0A023GNC7	Putative heat shock protein 90 (Fragment)	Amblyomma triste PE	5	7	4	7
D7F480	Gut cell surface glycoprotein	Rhipicephalus appendiculatus GN	7	6	4	6
A0A023FY55	Uncharacterized protein	Amblyomma parvum PE	2	6	4	6
A0A023GC00	Protein regulator of cytokinesis 1 (Fragment)	Amblyomma triste PE	0	10	5	7
B7PSI1	Muscle myosin heavy chain, putative	Ixodes scapularis GN	3	4	4	6
B7QM19	Tyrosine-protein kinase receptor	Ixodes scapularis GN	3	2	4	7
A0A023GMD4	Putative nuclear helicase mop-3/sno dead-box superfamily	Amblyomma triste PE	3	2	4	6
A0A023G930	Putative transcription termination factor rho (Fragment)	Amblyomma triste PE	2	1	4	7
L7MFH0	Putative mitogen activated protein kinase kinase kinase 1 (Fragment)	Rhipicephalus pulchellus PE	0	1	7	6
L7MJX9	Putative nad+ adp-ribosyltransferase-3-like protein strongylocentrotus purpuratus (Fragment)	Rhipicephalus pulchellus PE	7	0	4	6
L7MJN0	Putative syntaxin-binding protein 2 (Fragment)	Rhipicephalus pulchellus PE	15	0	10	11
C9W1P0	Ribosomal protein L21	Rhipicephalus sanguineus PE	0	0	4	6
L7M5S2	Putative collagen alpha-2iv chain	Rhipicephalus pulchellus PE	8	9	3	9
L7MJ95	Putative transcription factor 5qnca (Fragment)	Rhipicephalus pulchellus PE	7	6	3	6
L7M1H5	Uncharacterized protein	Rhipicephalus pulchellus PE	1	6	3	6
B7QD66	Putative uncharacterized protein (Fragment)	Ixodes scapularis GN	4	6	5	7
L7M1E5	Uncharacterized protein	Rhipicephalus pulchellus PE	0	6	4	7
E3SS19	Elongation factor 1-alpha (Fragment)	Ixodes ricinus PE	7	4	5	9
A0A023FI19	Synaptosomal-associated protein	Amblyomma cajennense PE	6	4	4	9
A0A023FH26	Putative 60s ribosomal protein l10	Amblyomma cajennense PE	1	3	4	7
B7PSY6	Two component histidine kinase, putative	Ixodes scapularis GN	0	3	3	6
A0A023G8B5	Putative atp-dependent rna helicase	Amblyomma triste PE	4	4	3	7
A0A023FPY8	Putative tick til 31 (Fragment)	Amblyomma cajennense PE	0	3	3	6
A0A023GNW5	Eukaryotic translation initiation factor 3 subunit A	Amblyomma triste PE	4	0	3	6
B7QC85	Tumor rejection antigen (Gp96), putative (Fragment)	Ixodes scapularis GN	3	10	2	7
B7QL56	DNA replication licensing factor, putative (Fragment)	Ixodes scapularis GN	0	9	2	7
L7M1I9	Putative atp-dependent rna helicase ddx54	Rhipicephalus pulchellus PE	2	7	2	8
A0A023GDJ5	Putative thyroid hormone receptor interactor 12 isoform 1 (Fragment)	Amblyomma triste PE	3	7	2	6
G3MQ15	Putative uncharacterized protein	Amblyomma maculatum PE	0	3	2	6
G3MS09	Putative uncharacterized protein	Amblyomma maculatum PE	5	4	4	11
L7MJR4	Uncharacterized protein (Fragment)	Rhipicephalus pulchellus PE	0	2	2	7
L7M625	Putative dna topoisomerase i	Rhipicephalus pulchellus PE	4	0	2	6
A0A023GDG3	Putative integrator complex subunit ixodes scapularis integrator complex subunit	Amblyomma triste PE	0	0	2	7
L7LTJ1	Putative rho-associated coiled-coil	Rhipicephalus pulchellus PE	0	0	2	6
A0A023GLF6	Putative mrna splicing factor/ chromatin binding snw family nuclear protein	Amblyomma triste PE	2	6	1	6
A0A023GNX2	Putative dead-box protein abstrakt (Fragment)	Amblyomma triste PE	9	4	1	8
B7QJG8	Jumonji/ARID domain-containing protein, putative	Ixodes scapularis GN	2	1	1	7
L7M9I0	Putative transcriptional regulator atrx (Fragment)	Rhipicephalus pulchellus PE	2	0	1	6
B7PIP9	Ankyrin 2,3/unc44, putative	Ixodes scapularis GN	6	8	0	6
L7MIT4	Uncharacterized protein (Fragment)	Rhipicephalus pulchellus PE	0	6	0	8
L7LYY8	Putative nuclear polyadenylated rna binding protein	Rhipicephalus pulchellus PE	2	6	0	6
L7M9B6	Putative isoleucyl-trna synthetase	Rhipicephalus pulchellus PE	0	5	0	7
B7PA27	Putative uncharacterized protein	Ixodes scapularis GN	1	3	0	9
K7N8H4	Paramyosin (Fragment)	Haemaphysalis longicornis PE	1	4	0	6
L7MBQ8	Putative tick transposon (Fragment)	Rhipicephalus pulchellus PE	3	2	0	6
A0A023FLS0	Integrin beta (Fragment)	Amblyomma cajennense PE	2	0	0	6
V5HV27	Putative lar-interacting protein (Fragment)	Ixodes ricinus PE	1	0	0	7
B7Q754	Putative uncharacterized protein	Ixodes scapularis GN	0	0	0	7
B7PGS0	Nitric oxide synthase, putative (Fragment)	Ixodes scapularis GN	0	0	0	7
V5HMC7	Putative keke-like motif-containing transcription regulator rlr1/suppressor of sin4 (Fragment)	Ixodes ricinus PE	0	0	0	7
G3MGZ3	Putative uncharacterized protein (Fragment)	Amblyomma maculatum PE	0	0	0	6
L7M721	Putative lipoprotein amino terminal region	Rhipicephalus pulchellus PE	14	16	10	6
L7M817	Putative peptid	Rhipicephalus pulchellus PE	5	12	9	5
B7Q596	Mll protein, putative	Ixodes scapularis GN	0	6	11	6
A0A023FQ15	Putative thioredoxin/protein disulfide isomerase	Amblyomma cajennense PE	2	1	9	5
B7Q0M9	Translation initiation factor if-2, putative (Fragment)	Ixodes scapularis GN	6	0	9	5
B7PAH4	CDC42 binding protein kinase alpha, putative (Fragment)	Ixodes scapularis GN	6	0	8	5
B7PJS4	Putative uncharacterized protein	Ixodes scapularis GN	5	0	11	5
V5H8L5	Putative m13 family peptidase	Ixodes ricinus PE	0	0	9	5
L7M6Y6	Putative ubiquitin-protein ligase	Rhipicephalus pulchellus PE	4	7	7	5
L7MMC8	Putative tick transposon (Fragment)	Rhipicephalus pulchellus PE	3	7	7	5
B7Q5G8	Spectrin beta chain, putative	Ixodes scapularis GN	6	6	7	5
V5HAS9	Uncharacterized protein (Fragment)	Ixodes ricinus PE	4	6	9	5
L7MM43	Putative 60s acidic ribosomal protein (Fragment)	Rhipicephalus pulchellus PE	3	1	8	5
A0A023FFQ8	40S ribosomal protein S6	Amblyomma cajennense PE	0	1	7	5
L7MMK9	Putative tick transposon (Fragment)	Rhipicephalus pulchellus PE	0	0	7	5
V5H7W4	Putative nucleoporin (Fragment)	Ixodes ricinus PE	8	11	6	6
B7PMU5	Cullin, putative (Fragment)	Ixodes scapularis GN	0	12	6	6
B7P8P2	Nbeal1, putative	Ixodes scapularis GN	4	11	6	5
C4NAM9	Bm86-like protein Ba86 (Fragment)	Rhipicephalus annulatus PE	0	7	6	5
L7MI19	Putative monocarboxylate transporter (Fragment)	Rhipicephalus pulchellus PE	4	7	6	5
V5HE47	Putative glutaminyl-trna synthetase	Ixodes ricinus PE	3	5	6	5
G0Z2I2	Bm86-like protein (Fragment)	Hyalomma detritum PE	3	7	6	5
V5HTX4	DNA-directed RNA polymerase (Fragment)	Ixodes ricinus PE	0	5	7	5
L7LPK1	Putative mrna splicing factor atp-dependent rna helicase	Rhipicephalus pulchellus PE	5	4	7	5
A0A023FIM5	Putative g protein (Fragment)	Amblyomma cajennense PE	2	4	9	5
E5D585	Ree86 protein	Rhipicephalus evertsi evertsi PE	0	4	7	5
B7PRZ6	Protein NUF1, putative	Ixodes scapularis GN	4	2	6	5
A0A023FMS2	Putative ribosome bioproteinsis protein	Amblyomma cajennense PE	4	2	8	5
B7PSE0	Ribosomal protein L4, putative	Ixodes scapularis GN	0	2	7	5
B7PIG6	ApsB, putative	Ixodes scapularis GN	4	0	6	5
A0A023FJ36	40S ribosomal protein S4	Amblyomma cajennense PE	0	0	6	5
V5H237	Putative low-density lipoprotein receptor-related protein 1b	Ixodes ricinus PE	5	11	6	7
L7MBD6	Putative tick transposon (Fragment)	Rhipicephalus pulchellus PE	4	8	5	5
L7LV43	Uncharacterized protein	Rhipicephalus pulchellus PE	1	9	5	5
D7F481	Gut cell surface glycoprotein	Rhipicephalus appendiculatus GN	8	7	5	5
B7P9L0	Tip120, putative (Fragment)	Ixodes scapularis GN	4	8	5	5
B2BZV8	BA86-like protein (Fragment)	Rhipicephalus annulatus PE	4	9	5	5
L7M5A5	Uncharacterized protein	Rhipicephalus pulchellus PE	8	9	8	6
V5ICX2	Putative nidogen	Ixodes ricinus PE	4	5	5	5
Q6WSQ1	Calreticulin	Haemaphysalis longicornis PE	5	7	6	8
B2ZHM8	HA86-like protein (Fragment)	Hyalomma anatolicum anatolicum GN	3	5	5	6
L7M3I4	Putative lipid exporter abca1	Rhipicephalus pulchellus PE	3	4	5	5
Q64K80	Calreticulin	Ixodes ovatus PE	1	4	5	6
B7PTP7	Plexin A, putative	Ixodes scapularis GN	0	4	5	5
B7PNR9	Ferredoxin-glutamate synthase, putative	Ixodes scapularis GN	3	3	5	5
V5GQS5	Putative phd finger protein (Fragment)	Ixodes ricinus PE	0	1	5	10
V5I3G8	Putative phosphatidylinositol 3-kinase	Ixodes ricinus PE	4	0	5	5
B7PYN9	Fatty acid synthase, putative	Ixodes scapularis GN	8	11	4	5
L7MDW5	Putative transcription factor nf-x1 (Fragment)	Rhipicephalus pulchellus PE	4	9	4	6
E5KCI4	Bm86 glycoprotein	Rhipicephalus microplus PE	3	10	4	8
L7MDR2	Putative voltage-dependent p/q type calcium channel voltage-dependent p/q type calcium channel (Fragment)	Rhipicephalus pulchellus PE	8	6	4	7
B7P620	Succinate dehydrogenase, putative (Fragment)	Ixodes scapularis GN	5	6	4	5
A0A023GGK1	Putative dna topoisomerase i (Fragment)	Amblyomma triste PE	14	9	5	6
B7PAK3	RNA helicase, putative	Ixodes scapularis GN	7	7	5	6
V5GK88	Putative peroxisomal acyl-coa oxidase	Ixodes ricinus PE	3	5	4	6
V5I4V1	Putative dna replication licensing factor mcm4 component (Fragment)	Ixodes ricinus PE	2	5	5	5
L7M7X2	Uncharacterized protein	Rhipicephalus pulchellus PE	7	5	4	6
A0A023G4Q6	Putative chromatin remodeling complex swi/snf component swi2 (Fragment)	Amblyomma triste PE	6	5	4	5
A0A023G5B1	Putative ubiquitin/40s ribosomal protein s27a fusion	Amblyomma triste PE	5	4	4	6
G3MI11	Putative uncharacterized protein (Fragment)	Amblyomma maculatum PE	2	6	4	5
D2CXW9	Bm86-like protein	Rhipicephalus annulatus PE	0	4	4	5
L7LTM0	Putative atp binding protein	Rhipicephalus pulchellus PE	7	3	4	7
V5I2U6	Putative histone-lysine n-methyltransferase nsd2 isoform 1 histone-lysine n-methyltransferase nsd2	Ixodes ricinus PE	2	3	5	5
A0A023GD55	Uncharacterized protein	Amblyomma triste PE	8	2	4	7
L7LUH1	Putative histone-lysine n-methyltransferase setd2	Rhipicephalus pulchellus PE	0	2	4	5
A0A023FY00	Protein argonaute (Fragment)	Amblyomma parvum PE	0	2	4	5
L7MAT2	Putative ecdysone receptor a2 daphnia magna ecdysone receptor a2	Rhipicephalus pulchellus PE	8	2	5	5
L7LYB2	Putative atp binding protein	Rhipicephalus pulchellus PE	8	3	6	5
V5GRG9	Putative microtubule cytoskeleton	Ixodes ricinus PE	3	2	4	5
V5HN65	Putative rho/rac guanine nucleotide exchange factor/faciogenital dysplasia protein 3 (Fragment)	Ixodes ricinus PE	5	0	7	7
A0A023FIN7	60S ribosomal protein L6 (Fragment)	Amblyomma cajennense PE	4	0	6	9
B7QGL8	Rad25/xp-B DNA repair helicase, putative	Ixodes scapularis GN	1	0	8	6
B7QB10	Guanine nucleotide-binding protein, putative (Fragment)	Ixodes scapularis GN	1	0	5	5
B7PDL3	Period circadian protein, putative	Ixodes scapularis GN	0	0	4	5
V5IE76	Putative dead box (Fragment)	Ixodes ricinus PE	12	13	4	8
V5HL36	Putative dual-specificity phosphatase (Fragment)	Ixodes ricinus PE	2	7	4	5
E2DZ05	Midgut protein	Rhipicephalus appendiculatus PE	7	6	3	5
A0A023GFX5	Putative ca2+/calmodulin-dependent protein (Fragment)	Amblyomma triste PE	4	7	3	8
V5II21	Putative multiple epidermal growth factor-like protein 10 (Fragment)	Ixodes ricinus PE	0	8	3	6
V5HWZ7	Guanylate cyclase (Fragment)	Ixodes ricinus PE	6	6	3	9
L7LX82	Putative ypt/rab gtpase activating protein	Rhipicephalus pulchellus PE	5	5	4	8
L7M384	Putative biotinidase and vanin	Rhipicephalus pulchellus PE	2	6	5	8
V5H652	Putative transcription factor 5qnca	Ixodes ricinus PE	2	5	3	5
B7Q260	Putative uncharacterized protein	Ixodes scapularis GN	0	6	3	5
V5H6X2	Putative 5'-3' exonuclease hke1/rat1 (Fragment)	Ixodes ricinus PE	4	4	4	5
B7P3H6	Skeletrophin, putative	Ixodes scapularis GN	3	4	3	8
E4W3Z1	Protein disulfide isomerase 3 (Fragment)	Haemaphysalis qinghaiensis PE	4	4	3	5
L7MHS0	Putative voltage-gated calcium channel alpha subunit (Fragment)	Rhipicephalus pulchellus PE	2	6	3	6
B7PQL7	Pentatricopeptide repeat-containing protein, putative (Fragment)	Ixodes scapularis GN	3	4	3	5
B7Q1H6	Laminin gamma-1 chain, putative (Fragment)	Ixodes scapularis GN	1	4	3	5
L7M2N7	Putative brefeldin a-inhibited guanine nucleotide-exchange protein 1	Rhipicephalus pulchellus PE	8	3	3	5
B7PIX7	Putative uncharacterized protein	Ixodes scapularis GN	0	4	3	5
V5I497	Putative atp-citrate lyase	Ixodes ricinus PE	4	2	3	5
G3MMI2	Putative uncharacterized protein	Amblyomma maculatum PE	4	3	3	6
B7PXQ5	Putative uncharacterized protein (Fragment)	Ixodes scapularis GN	0	2	3	5
V5IJB9	Putative activation of mapk involved in innate immune response	Ixodes ricinus PE	0	2	3	5
V5HAT2	Protein serine/threonine kinase (Fragment)	Ixodes ricinus PE	5	0	3	5
L7LVF9	Uncharacterized protein	Rhipicephalus pulchellus PE	9	0	4	6
B7P2V3	Putative uncharacterized protein	Ixodes scapularis GN	2	0	3	5
B7PQ53	Thyroid hormone receptor-associated protein, putative	Ixodes scapularis GN	1	0	3	5
A0A023FMP5	Putative tick metalloprotease 1	Amblyomma cajennense PE	0	0	5	8
A0A023FXQ3	Putative glutamate/leucine/phenylalanine/valine dehydrogenase	Amblyomma parvum PE	0	0	3	5
B7Q151	Ras-responsive element binding protein, putative	Ixodes scapularis GN	5	8	5	8
D2ST79	Bm86-like protein (Fragment)	Rhipicephalus appendiculatus GN	0	6	2	5
B7QL71	Heat shock protein, putative (Fragment)	Ixodes scapularis GN	4	8	2	5
B7PZN7	Protein dopey-1, putative	Ixodes scapularis GN	4	6	2	5
V5I0S2	Putative alpha-d-galactosidase melibiase	Ixodes ricinus PE	3	5	3	7
L7MGQ5	Putative aaa+-type atpase (Fragment)	Rhipicephalus pulchellus PE	3	5	2	5
L7M9V3	Putative transcriptional repressor ezh1	Rhipicephalus pulchellus PE	0	6	3	5
L7MI37	Putative transglutaminase/protease-like logues (Fragment)	Rhipicephalus pulchellus PE	0	5	3	5
A0A023GM77	Putative vigilin (Fragment)	Amblyomma triste PE	0	5	2	5
L7MHU3	Putative tick thioester protein (Fragment)	Rhipicephalus pulchellus PE	5	5	3	5
L7MMF8	Putative heat shock protein 70 (Fragment)	Rhipicephalus pulchellus PE	4	7	2	5
L7ME49	Uncharacterized protein (Fragment)	Rhipicephalus pulchellus PE	0	4	2	7
B7P0Y1	Lipase maturation factor, putative (Fragment)	Ixodes scapularis GN	0	7	3	6
L7M0K7	Putative tick transposon	Rhipicephalus pulchellus PE	0	3	2	5
G3MQ14	Putative uncharacterized protein	Amblyomma maculatum PE	0	3	2	5
V5HZ13	Ubiquitin carboxyl-terminal hydrolase (Fragment)	Ixodes ricinus PE	5	3	4	6
L7LVE8	Uncharacterized protein	Rhipicephalus pulchellus PE	5	1	2	6
A0A023FNE9	Putative elongation factor 2-like isoform 1	Amblyomma cajennense PE	5	0	2	6
B7PKV8	RNA-binding protein, putative	Ixodes scapularis GN	3	0	2	7
A0A023G8N9	Putative guanine nucleotide exchange factor (Fragment)	Amblyomma triste PE	3	0	3	5
L7MC13	Putative lim domain binding protein ldb1/nli/clim (Fragment)	Rhipicephalus pulchellus PE	2	0	3	5
B7QEP7	Putative uncharacterized protein	Ixodes scapularis GN	1	0	2	5
B7PUD4	Jumonji domain-containing protein, putative	Ixodes scapularis GN	0	0	2	6
V5H9G3	Putative regulation of rho protein signal transduction (Fragment)	Ixodes ricinus PE	0	0	3	5
A0A023GMC8	Putative p-type atpase (Fragment)	Amblyomma triste PE	0	0	2	5
B7PAB5	Putative uncharacterized protein	Ixodes scapularis GN	0	0	2	5
L7MCU8	Putative tick transposon (Fragment)	Rhipicephalus pulchellus PE	4	6	2	5
A0A023G8V6	Putative salivary gland metalloprotease (Fragment)	Amblyomma triste PE	2	4	1	6
L7LU41	Uncharacterized protein	Rhipicephalus pulchellus PE	0	4	1	6
A0A023FQT3	Uncharacterized protein (Fragment)	Amblyomma cajennense PE	0	5	1	5
A0A023GMX4	Uncharacterized protein (Fragment)	Amblyomma triste PE	2	0	1	6
A0A023FFS9	Putative atp-dependent clp protease atp-binding subunit clpx-like mitochondrial-like protein (Fragment)	Amblyomma cajennense PE	0	0	1	6
B7PEB0	Putative uncharacterized protein	Ixodes scapularis GN	0	0	1	5
L7MHP1	Putative transcriptional coactivator caper rrm superfamily (Fragment)	Rhipicephalus pulchellus PE	0	0	1	5
L7MJV5	Putative phagocytosis engulfment (Fragment)	Rhipicephalus pulchellus PE	3	14	0	6
L7MIQ2	Putative exosomal 3'-5' exoribonuclease complex subunit (Fragment)	Rhipicephalus pulchellus PE	2	8	0	5
L7LTT0	Uncharacterized protein	Rhipicephalus pulchellus PE	0	7	0	6
L7MKE9	Putative sarm protein with sterile alpha and armadillo motifs (Fragment)	Rhipicephalus pulchellus PE	4	7	0	5
L7M0D5	Putative hiv-1 vpr-binding protein	Rhipicephalus pulchellus PE	3	7	0	5
J7LVN2	Paramyosin	Haemaphysalis longicornis PE	1	7	0	5
L7MML3	Putative tick transposon (Fragment)	Rhipicephalus pulchellus PE	5	8	0	7
A0A023FS25	Putative alternative splicing factor srp55/b52/srp75 ixodes scapularis alternative splicing factor (Fragment)	Amblyomma parvum PE	3	6	0	5
A0A023GLL3	Putative catalytic step 2 spliceosome (Fragment)	Amblyomma triste PE	4	4	0	6
V5HUM9	Putative proteophosphoglycan ppg4 braziliensis mhom/br/75/m2904 proteophosphoglycan ppg4	Ixodes ricinus PE	5	5	0	5
L7ML81	Uncharacterized protein (Fragment)	Rhipicephalus pulchellus PE	6	4	0	5
L7MH72	Putative kinesin-73 (Fragment)	Rhipicephalus pulchellus PE	3	5	0	5
L7MEH5	Putative phenylalanyl-trna synthetase (Fragment)	Rhipicephalus pulchellus PE	3	4	0	5
B7QDL0	Isoleucyl-tRNA synthetase, putative (Fragment)	Ixodes scapularis GN	0	4	0	6
B7PTL4	Putative uncharacterized protein	Ixodes scapularis GN	0	8	0	5
L7M0A4	Uncharacterized protein	Rhipicephalus pulchellus PE	2	3	0	5
B7PDH1	Propionyl-coenzyme A carboxylase, alpha polypeptide, putative (Fragment)	Ixodes scapularis GN	2	3	0	5
A0A023G8Y3	Putative tick metalloprotease 1 (Fragment)	Amblyomma triste PE	0	3	0	5
L7M640	Uncharacterized protein	Rhipicephalus pulchellus PE	4	2	0	6
G3MLP9	Putative uncharacterized protein	Amblyomma maculatum PE	3	3	0	5
L7MGF1	Putative ral (Fragment)	Rhipicephalus pulchellus PE	3	2	0	5
B7QHI2	Fbxl20, putative	Ixodes scapularis GN	1	4	0	6
B7PB93	Putative uncharacterized protein (Fragment)	Ixodes scapularis GN	1	2	0	5
A0A023GHR6	Putative p21-activated serine/threonine protein kinase	Amblyomma triste PE	0	2	0	6
L7LXG1	Putative p-type atpase	Rhipicephalus pulchellus PE	0	2	0	5
L7M6Z7	Putative peptide exporter abc superfamily	Rhipicephalus pulchellus PE	2	1	0	5
L7MDJ5	Putative chromatin remodeling complex swi/snf component swi2 (Fragment)	Rhipicephalus pulchellus PE	8	0	0	8
G3MI88	Putative uncharacterized protein (Fragment)	Amblyomma maculatum PE	6	0	0	5
L7LY67	Uncharacterized protein	Rhipicephalus pulchellus PE	4	0	0	5
V5HZK4	Putative crooked legs (Fragment)	Ixodes ricinus PE	3	0	0	6
L7M1C2	Putative myosin viia and rab	Rhipicephalus pulchellus PE	6	0	0	8
L7LXE3	Putative tick transposon	Rhipicephalus pulchellus PE	2	0	0	6
V5I593	Integrin beta (Fragment)	Ixodes ricinus PE	2	0	0	6
L7M264	Putative spinophilin	Rhipicephalus pulchellus PE	3	0	0	5
A0A023FLZ7	Putative chaperonin subunit ixodes scapularis chaperonin subunit	Amblyomma cajennense PE	2	0	0	5
L7MFC5	Putative receptor protein tyrosine phosphatase (Fragment)	Rhipicephalus pulchellus PE	1	0	0	6
V5HTM4	Putative polynucleotide 5'-hydroxyl-kinase	Ixodes ricinus PE	1	0	0	5
A0A023GJI5	Putative acyl-coa synthetase (Fragment)	Amblyomma triste PE	0	0	0	7
L7MBD5	Uncharacterized protein (Fragment)	Rhipicephalus pulchellus PE	0	0	0	5
L7MBT3	Putative leukocyte-antigen-related-like protein (Fragment)	Rhipicephalus pulchellus PE	0	0	0	5
L7MHF8	Putative death-associated protein 6 (Fragment)	Rhipicephalus pulchellus PE	0	0	0	5
B7QC82	Bromodomain and PHD finger-containing protein 1, brpf1, putative	Ixodes scapularis GN	0	0	0	5
B7Q6H1	Putative uncharacterized protein	Ixodes scapularis GN	0	0	0	5
B7QCQ3	Putative uncharacterized protein	Ixodes scapularis GN	0	0	0	5
B7QB38	Cytospin-A, putative (Fragment)	Ixodes scapularis GN	0	0	0	5
V5HWC1	Putative ring finger protein (Fragment)	Ixodes ricinus PE	0	0	0	5
V5HB77	Putative polycomb group ring finger protein 2 (Fragment)	Ixodes ricinus PE	0	0	0	5
G3MM72	Putative uncharacterized protein	Amblyomma maculatum PE	8	14	10	4
L7MGC6	Uncharacterized protein (Fragment)	Rhipicephalus pulchellus PE	5	6	13	6
B7Q677	Girdin, putative	Ixodes scapularis GN	1	5	9	4
A0A023FHX7	Putative 60s ribosomal protein l7 (Fragment)	Amblyomma cajennense PE	0	1	9	4
A0A023FZU9	Putative processing peptidase beta subunit ixodes scapularis processing peptidase beta subunit	Amblyomma parvum PE	7	10	8	4
L7MMH5	Uncharacterized protein (Fragment)	Rhipicephalus pulchellus PE	7	3	8	4
B7P5M7	Transformation/transcription domain-associated protein, putative (Fragment)	Ixodes scapularis GN	2	0	8	4
B7PZR6	Hemicentin, putative (Fragment)	Ixodes scapularis GN	5	4	7	6
B7Q1I5	Ras GTP-ase activating protein with iq motif, putative (Fragment)	Ixodes scapularis GN	4	4	7	4
B7QJ35	DNA polymerase gamma, putative	Ixodes scapularis GN	10	10	11	8
L7MBS1	Uncharacterized protein (Fragment)	Rhipicephalus pulchellus PE	3	6	7	5
V5GWA3	Putative rave regulator of v-atpase assembly complex subunit rav1/dmx protein (Fragment)	Ixodes ricinus PE	0	1	7	4
L7MMP3	Putative tick transposon (Fragment)	Rhipicephalus pulchellus PE	3	0	7	4
G9M4L6	Vitellogenin-B	Haemaphysalis longicornis GN	3	13	6	5
V5HF39	Putative mapk-activating protein denn	Ixodes ricinus PE	9	13	8	5
L7LZ83	Uncharacterized protein	Rhipicephalus pulchellus PE	3	7	7	4
B7QIX9	Putative uncharacterized protein	Ixodes scapularis GN	3	8	6	4
A0A023G623	Putative u1 small nuclear ribonucleoprotein rrm superfamily	Amblyomma triste PE	7	7	7	4
B7PKP0	Zinc finger protein, putative (Fragment)	Ixodes scapularis GN	0	6	7	4
G3MF53	Putative uncharacterized protein (Fragment)	Amblyomma maculatum PE	11	8	14	6
L7LXP7	Putative nucleoporin	Rhipicephalus pulchellus PE	6	5	8	5
A0A023FVL4	Putative stress-induced-phosphoprotein 1 (Fragment)	Amblyomma parvum PE	9	6	8	4
B7P3T7	Predicted protein	Ixodes scapularis GN	0	3	6	5
V5HLW5	Putative dual serine/threonine and tyrosine protein kinase (Fragment)	Ixodes ricinus PE	0	3	6	4
L7LU37	Putative tick transposon	Rhipicephalus pulchellus PE	4	0	6	4
C9W1Q2	Protein disulfide isomerase	Rhipicephalus sanguineus PE	0	0	6	4
A0A023FS16	Uncharacterized protein	Amblyomma parvum PE	0	0	6	4
A0A023GBI5	Putative endoplasmic reticulum protein 29 (Fragment)	Amblyomma triste PE	0	0	6	4
R4JGR7	Calreticulin (Fragment)	Hyalomma anatolicum anatolicum PE	5	8	5	5
A0A023FKV5	Putative glutaminyl-trna synthetase	Amblyomma cajennense PE	5	6	5	4
L7MK67	Protein argonaute (Fragment)	Rhipicephalus pulchellus PE	7	6	5	4
Q64K95	Calreticulin	Amblyomma scutatum PE	6	8	6	7
L7MLZ7	Putative minibrain (Fragment)	Rhipicephalus pulchellus PE	7	4	5	4
A0A023GDG9	Putative arp2/3 complex-interacting protein vip1/asp1 involved in regulation of actin cytoskeleton	Amblyomma triste PE	6	5	6	4
V5GXU8	Putative membrane protein associated with esophageal cancer in s (Fragment)	Ixodes ricinus PE	0	7	6	4
A0A034WXV3	Secreted protein 1	Rhipicephalus microplus PE	5	11	5	7
B7P8Q5	Hsp70, putative (Fragment)	Ixodes scapularis GN	4	3	8	8
V5H251	Putative arp2/3 complex-interacting protein vip1/asp1 involved in regulation of actin cytoskeleton (Fragment)	Ixodes ricinus PE	4	4	6	4
B7P6V8	Phosphoinositol 3-phosphate-binding protein, putative	Ixodes scapularis GN	5	4	5	4
L7MK02	Putative peptide exporter abc superfamily (Fragment)	Rhipicephalus pulchellus PE	4	3	5	4
L7M0P0	Putative trp logous cation channel protein	Rhipicephalus pulchellus PE	1	3	5	4
A0A023FKD0	Putative 40s ribosomal protein sa p40/laminin receptor 1 (Fragment)	Amblyomma cajennense PE	0	3	6	5
B7PZC2	Cpg binding protein, putative (Fragment)	Ixodes scapularis GN	0	5	5	4
V5HNB7	Putative golgin subfamily protein a member 4	Ixodes ricinus PE	0	3	5	4
B7QIL0	Hemelipoglycoprotein, putative (Fragment)	Ixodes scapularis GN	5	2	5	4
L7MK87	Uncharacterized protein (Fragment)	Rhipicephalus pulchellus PE	1	2	5	4
L7MEG6	Putative cell adhesion molecule (Fragment)	Rhipicephalus pulchellus PE	0	2	5	4
L7LR86	Putative tritil protein	Rhipicephalus pulchellus PE	3	0	5	4
L7M4P6	Uncharacterized protein	Rhipicephalus pulchellus PE	0	0	5	4
B7P546	Multidrug resistance protein, putative	Ixodes scapularis GN	5	7	5	4
L7MGC9	Uncharacterized protein (Fragment)	Rhipicephalus pulchellus PE	4	7	5	4
B7Q9A2	Dedicator of cytokinesis protein, putative (Fragment)	Ixodes scapularis GN	3	8	5	4
A0A023G3C0	Putative terribly reduced optic lobes (Fragment)	Amblyomma triste PE	7	6	5	4
Q9GYX7	Heme-binding aspartic proteinase (Fragment)	Rhipicephalus microplus PE	7	8	4	4
L7MH88	Uncharacterized protein (Fragment)	Rhipicephalus pulchellus PE	2	6	4	4
B7PYU2	Putative uncharacterized protein (Fragment)	Ixodes scapularis GN	0	11	6	9
A0A023FLH5	Putative transport protein sec61 alpha subunit (Fragment)	Amblyomma cajennense PE	5	5	4	5
L7M8Z9	Putative histone acetylation protein	Rhipicephalus pulchellus PE	5	5	4	4
L7M6N2	Putative succinate dehydrogenase flavoprotein subunit	Rhipicephalus pulchellus PE	4	5	4	4
V5HB26	Putative cell cycle-associated protein (Fragment)	Ixodes ricinus PE	3	5	5	4
V5IHY8	Putative mrna processing protein	Ixodes ricinus PE	5	6	5	5
L7MIL0	Putative sorting nexin 13 (Fragment)	Rhipicephalus pulchellus PE	2	5	4	4
L7MG64	Putative mrna splicing factor atp-dependent rna helicase (Fragment)	Rhipicephalus pulchellus PE	3	7	4	4
L7MGW6	Piwi-like protein (Fragment)	Rhipicephalus pulchellus PE	0	6	4	4
L7MGB4	Putative tudor domain-containing protein 7 (Fragment)	Rhipicephalus pulchellus PE	3	4	4	5
B7QBU6	Putative uncharacterized protein	Ixodes scapularis GN	3	4	4	5
B7Q2Y7	Chondroitin synthase, putative	Ixodes scapularis GN	3	4	8	4
V5HWB6	Putative histone tail methylase (Fragment)	Ixodes ricinus PE	3	5	6	6
B7P563	Rfx5, putative	Ixodes scapularis GN	0	4	6	4
V5I3N1	Putative map/microtubule affinity-regulating kinase 3-like isoform 1 (Fragment)	Ixodes ricinus PE	0	4	4	4
V5GEP4	Putative spatacsin	Ixodes ricinus PE	8	7	6	7
B7P0N2	Chitinase, putative	Ixodes scapularis GN	3	4	4	4
V5HL46	Putative mrna cleavage and polyadenylation factor i complex subunit rna14 (Fragment)	Ixodes ricinus PE	0	3	4	6
B7QLX1	Putative uncharacterized protein (Fragment)	Ixodes scapularis GN	10	5	7	9
L7MJG1	Uncharacterized protein (Fragment)	Rhipicephalus pulchellus PE	4	3	6	6
L7LXP6	Uncharacterized protein	Rhipicephalus pulchellus PE	3	2	4	4
A0A023FSG2	Putative outcast ele5 orf1-h 1e-40-j 4 (Fragment)	Amblyomma parvum PE	2	2	9	5
A0A023FL21	Putative 40s ribosomal protein sa p40/laminin receptor 1 (Fragment)	Amblyomma cajennense PE	0	2	5	5
A0A023FJ87	Putative 60s ribosomal protein l22 (Fragment)	Amblyomma cajennense PE	0	2	6	4
A0A023FUQ4	Putative 40s ribosomal protein s2	Amblyomma parvum PE	2	1	7	4
L7M7U4	Proteasome subunit alpha type	Rhipicephalus pulchellus PE	4	3	5	5
V5IJ55	Putative kif1-binding protein	Ixodes ricinus PE	3	0	5	5
B7Q258	Splicing endonuclease positive effector sen1, putative	Ixodes scapularis GN	4	0	4	4
V5HV23	Phosphoinositide phospholipase C (Fragment)	Ixodes ricinus PE	5	0	4	6
B7Q0R9	ATP-dependent RNA helicase, putative (Fragment)	Ixodes scapularis GN	2	0	4	4
L7M3R5	Uncharacterized protein	Rhipicephalus pulchellus PE	0	0	4	9
A0A023FJD5	60S ribosomal protein L6	Amblyomma cajennense PE	0	0	5	4
L7MGA1	Putative tick salivary metalloprotease (Fragment)	Rhipicephalus pulchellus PE	0	0	4	4
B7PWC4	Poly [ADP-ribose] polymerase, putative	Ixodes scapularis GN	2	7	4	4
V5GT94	Putative glutamate receptor ionotropic kainate 3 (Fragment)	Ixodes ricinus PE	2	6	3	4
A0A023FWX3	Putative succinate dehydrogenase flavoprotein subunit	Amblyomma parvum PE	3	5	3	4
L7M4F6	Uncharacterized protein	Rhipicephalus pulchellus PE	2	5	5	4
B7PTZ6	Pacman protein, putative	Ixodes scapularis GN	2	5	4	4
B7QDT2	Putative uncharacterized protein	Ixodes scapularis GN	2	6	3	4
A0A023FXA6	Putative acetyl-coa acetyltransferase (Fragment)	Amblyomma parvum PE	1	5	3	4
B7P127	Metabotropic glutamate receptor 1, putative	Ixodes scapularis GN	0	7	3	4
B7P977	Zinc finger protein, putative	Ixodes scapularis GN	0	5	3	4
V5GZN1	Putative glycine dehydrogenase decarboxylating	Ixodes ricinus PE	7	6	4	8
B7QBQ1	Salivary protein Is3, putative	Ixodes scapularis GN	5	6	5	7
L7MC56	Putative tick transposon (Fragment)	Rhipicephalus pulchellus PE	0	5	4	4
B7P908	Ubiquitin conjugation factor E4 B, putative (Fragment)	Ixodes scapularis GN	0	4	3	4
B7P460	Neuralized, putative (Fragment)	Ixodes scapularis GN	7	4	4	4
B7PSB3	Conserved oligomeric golgi complex subunit, putative	Ixodes scapularis GN	3	3	3	4
B7P6R0	Bromo adjacent homology (BAH) domain-containing protein	Ixodes scapularis GN	2	4	3	4
L7M1P6	Putative tick transposon	Rhipicephalus pulchellus PE	1	3	3	4
V5IDM4	Putative zinc finger protein (Fragment)	Ixodes ricinus PE	0	3	4	6
L7M2U4	Putative guanine nucleotide binding protein-like 2 nucleolar	Rhipicephalus pulchellus PE	0	3	3	4
L7LZZ4	Putative ankyrin	Rhipicephalus pulchellus PE	0	3	3	4
B7Q2A6	Putative uncharacterized protein (Fragment)	Ixodes scapularis GN	0	3	3	4
B7PQ19	Protein phosphatase PP2A, putative	Ixodes scapularis GN	5	2	5	7
V5HJ00	Uncharacterized protein	Ixodes ricinus PE	5	4	6	7
B7PKP7	E3 ubiquitin protein ligase Bre1, putative	Ixodes scapularis GN	5	2	6	7
B7P734	Putative uncharacterized protein	Ixodes scapularis GN	4	3	5	7
L7MDH2	Putative syntaxin-binding protein 2 (Fragment)	Rhipicephalus pulchellus PE	15	4	5	12
L7M574	Putative 60s ribosomal protein l13a	Rhipicephalus pulchellus PE	3	3	4	5
B7PCN5	Ubiquitin ligase Cop1, putative (Fragment)	Ixodes scapularis GN	3	2	4	4
L7MAS3	Putative tick transposon (Fragment)	Rhipicephalus pulchellus PE	2	2	4	5
V5HVJ9	Putative conserved plasma membrane protein (Fragment)	Ixodes ricinus PE	2	2	3	5
B7PTC6	Zinc finger protein, putative	Ixodes scapularis GN	5	2	3	4
B7PYZ8	Intermediate in Toll signal transduction pathway, putative	Ixodes scapularis GN	2	2	3	4
L7MHZ4	Uncharacterized protein (Fragment)	Rhipicephalus pulchellus PE	0	2	3	5
B7PD22	Putative uncharacterized protein	Ixodes scapularis GN	0	2	4	4
B7PLV6	Neuronal pas domain protein, putative	Ixodes scapularis GN	0	2	3	4
V5HHW4	Putative kinesin-like protein kif3b (Fragment)	Ixodes ricinus PE	3	1	4	4
G3MGS0	Putative uncharacterized protein (Fragment)	Amblyomma maculatum PE	1	1	3	4
A0A023GGA0	Synaptosomal-associated protein	Amblyomma triste PE	0	1	4	6
L7MI98	Putative transporter (Fragment)	Rhipicephalus pulchellus PE	0	1	3	5
V5IG97	Putative translation initiation factor if-2 mitochondrial (Fragment)	Ixodes ricinus PE	3	0	4	5
Q4PMB5	60S ribosomal protein L10, putative	Ixodes scapularis GN	3	0	4	5
V5IEI9	Putative endophilin-a (Fragment)	Ixodes ricinus PE	5	0	3	5
V5HA22	Putative zinc ion binding protein (Fragment)	Ixodes ricinus PE	1	0	3	4
L7LYU3	Uncharacterized protein	Rhipicephalus pulchellus PE	0	0	4	4
A0A023FJ23	Putative ribosomal protein (Fragment)	Amblyomma cajennense PE	0	0	4	4
B7QD53	Homeobox protein cut-like	Ixodes scapularis GN	0	0	3	4
G3MKM4	Putative uncharacterized protein	Amblyomma maculatum PE	0	0	3	4
L7M965	Putative rho-associated coiled-coil	Rhipicephalus pulchellus PE	6	7	2	4
L7LV79	Putative myosin class ii heavy chain	Rhipicephalus pulchellus PE	4	8	4	4
G3MSV1	Putative uncharacterized protein	Amblyomma maculatum PE	4	10	2	4
A0A023FEK8	Putative translation elongation factor ef-1 alpha/tu (Fragment)	Amblyomma cajennense PE	7	7	4	5
V5IHN2	Putative catalytic domain of epidermal growth factor receptor-like protein tyrosine kinase (Fragment)	Ixodes ricinus PE	2	6	2	4
A0A023FKK3	Putative glycinamide ribonucleotide synthetase gars/aminoimidazole ribonucleotide synthetase airs	Amblyomma cajennense PE	6	6	2	4
B7PWN6	Histone-lysine N-methyltransferase, bat/ehmt, putative	Ixodes scapularis GN	6	5	2	4
L7MKS9	Putative histone-lysine n-methyltransferase nsd2 (Fragment)	Rhipicephalus pulchellus PE	4	7	3	6
B7P8W7	Copper-transporting ATPase 1, putative	Ixodes scapularis GN	4	5	3	4
V5HXN0	Putative mrna cleavage and polyadenylation factor i/ii complex subunit pcf11 (Fragment)	Ixodes ricinus PE	2	6	2	5
B7Q665	U4/u6 small nuclear ribonucleoprotein, putative	Ixodes scapularis GN	0	5	2	4
A0A023FLE2	Putative nuclear pore complex nup160 component (Fragment)	Amblyomma cajennense PE	2	5	2	4
B7Q993	Putative uncharacterized protein	Ixodes scapularis GN	1	4	3	5
B7QMR1	Vitellogenin receptor, putative	Ixodes scapularis GN	0	4	2	9
L7MK37	Putative tick transposon (Fragment)	Rhipicephalus pulchellus PE	0	6	2	7
L7LZL2	Putative atp-dependent rna helicase	Rhipicephalus pulchellus PE	0	5	2	4
A0A023GNA3	Uncharacterized protein	Amblyomma triste PE	0	4	2	4
V5HP83	Putative copi vesicle coat	Ixodes ricinus PE	4	3	2	5
B7PAI3	Vacuolar protein-sorting protein, putative (Fragment)	Ixodes scapularis GN	5	3	2	4
L7M1Z4	Putative transmembrane transport	Rhipicephalus pulchellus PE	7	7	5	5
B7QGI8	Piccolo, putative	Ixodes scapularis GN	2	3	2	5
B7PEX2	Fatty acid synthase, putative (Fragment)	Ixodes scapularis GN	5	6	3	4
L7MF44	Uncharacterized protein (Fragment)	Rhipicephalus pulchellus PE	0	4	3	6
B7Q9B2	Putative uncharacterized protein	Ixodes scapularis GN	0	3	2	5
V5HGI5	Putative 39s ribosomal protein l2	Ixodes ricinus PE	2	4	4	6
L7MMC7	Putative caatt-binding transcription factor/60s ribosomal subunit bioproteinsis protein (Fragment)	Rhipicephalus pulchellus PE	2	2	2	5
B7PJY1	Putative uncharacterized protein	Ixodes scapularis GN	2	2	2	4
V5HPE3	Uncharacterized protein (Fragment)	Ixodes ricinus PE	0	2	2	8
L7MIC3	Putative cytosolic ca2+-dependent cysteine prote (Fragment)	Rhipicephalus pulchellus PE	0	4	2	6
G3MRP9	Putative uncharacterized protein	Amblyomma maculatum PE	6	1	3	6
A0A023FSH4	Putative hydroxymethylglutaryl-coa synthase (Fragment)	Amblyomma parvum PE	1	1	2	6
A0A023FZK8	Putative dentin sialophosphoprotein (Fragment)	Amblyomma parvum PE	1	1	2	5
V5HT23	Uncharacterized protein (Fragment)	Ixodes ricinus PE	1	1	2	4
L7LRF5	Putative bitil peptide	Rhipicephalus pulchellus PE	0	1	2	8
L7LY07	Putative tick transposon	Rhipicephalus pulchellus PE	0	1	2	4
B7P515	Ankyrin repeat-containing protein (Fragment)	Ixodes scapularis GN	4	0	4	6
B7PDH8	Sorting nexin, putative	Ixodes scapularis GN	4	0	2	4
L7MDY3	Putative tick transposon (Fragment)	Rhipicephalus pulchellus PE	3	0	2	4
L7M565	Putative mitochondrial 28s ribosomal protein s27	Rhipicephalus pulchellus PE	3	0	3	4
L7MHF5	Putative tritil protein (Fragment)	Rhipicephalus pulchellus PE	2	0	2	4
B7P400	Monocarboxylate transporter, putative (Fragment)	Ixodes scapularis GN	1	0	2	4
L7LX32	Putative ring finger protein 10	Rhipicephalus pulchellus PE	0	0	2	6
L7M2D6	CTP synthase	Rhipicephalus pulchellus PE	0	0	3	5
L7MDL1	Putative zinc finger protein (Fragment)	Rhipicephalus pulchellus PE	0	0	2	5
L7MDU1	Putative serine/threonine-protein kinase haspin (Fragment)	Rhipicephalus pulchellus PE	0	0	2	5
L7MB50	Putative bitil peptide (Fragment)	Rhipicephalus pulchellus PE	0	0	2	4
V5IH40	Putative tick metalloprotease (Fragment)	Ixodes ricinus PE	0	0	2	4
B7PTR8	Zinc finger, C2H2 type, putative	Ixodes scapularis GN	0	0	2	4
A0A023GLJ3	Putative heat shock protein	Amblyomma triste PE	5	9	1	4
L7MF31	Putative udp-glucose pyrophosphorylase (Fragment)	Rhipicephalus pulchellus PE	4	7	1	5
L7MHL6	Putative bromodomain adjacent to zinc finger domain protein 2b (Fragment)	Rhipicephalus pulchellus PE	0	4	1	4
L7M514	Putative atp-dependent rna helicase ddx23	Rhipicephalus pulchellus PE	5	3	1	4
B7PCJ2	Putative uncharacterized protein	Ixodes scapularis GN	1	3	2	6
V5HU34	Putative adaptor complexes medium subunit family (Fragment)	Ixodes ricinus PE	1	3	2	4
B7PWQ4	Putative uncharacterized protein	Ixodes scapularis GN	1	4	1	4
G3MHN2	Putative uncharacterized protein (Fragment)	Amblyomma maculatum PE	0	4	1	4
G3MH28	Putative uncharacterized protein (Fragment)	Amblyomma maculatum PE	1	5	2	5
V5IDT2	Putative dna replication factor cdt1	Ixodes ricinus PE	0	2	1	5
L7LZQ9	Uncharacterized protein	Rhipicephalus pulchellus PE	0	2	1	4
B7QBA3	Highwire, putative	Ixodes scapularis GN	4	1	1	4
A0A023FZW8	CTP synthase (Fragment)	Amblyomma parvum PE	0	1	2	5
A0A023G7Y6	Uncharacterized protein	Amblyomma triste PE	0	1	1	4
L7LZI3	Putative dual specificity	Rhipicephalus pulchellus PE	2	0	1	4
A0A023FDF0	Uncharacterized protein (Fragment)	Amblyomma cajennense PE	2	0	1	4
G3MHJ0	Putative uncharacterized protein (Fragment)	Amblyomma maculatum PE	2	0	1	5
V5HF78	Uncharacterized protein (Fragment)	Ixodes ricinus PE	0	0	1	8
V5GUW7	Putative dna damage-responsive repressor gis1/rph1 jumonji superfamily (Fragment)	Ixodes ricinus PE	0	0	1	6
L7LS70	Putative at-rich interactive domain-containing protein 2	Rhipicephalus pulchellus PE	0	0	1	5
L7M6A2	Serine/threonine-protein phosphatase	Rhipicephalus pulchellus PE	0	0	1	5
E2J6W9	Putative ribosomal protein L28 (Fragment)	Hyalomma marginatum rufipes PE	0	0	1	5
G3MHN9	Putative uncharacterized protein (Fragment)	Amblyomma maculatum PE	0	0	1	5
S4UD38	Subolesin (Fragment)	Dermacentor reticulatus PE	0	0	1	4
L7MM57	Putative tick transposon (Fragment)	Rhipicephalus pulchellus PE	0	0	1	4
A0A023FUJ0	Putative sulfotransferase (Fragment)	Amblyomma cajennense PE	0	0	1	4
L7MJU0	Putative phosphatidylinositol-45-bisphosphate 3-kinase catalytic subunit alpha isoform (Fragment)	Rhipicephalus pulchellus PE	0	0	1	4
B7PYH0	Alternative splicing factor SRp55/B52/SRp75, putative	Ixodes scapularis GN	0	0	1	4
B7PWM1	DNA primase large subunit, putative	Ixodes scapularis GN	0	0	1	4
V5HI07	Uncharacterized protein (Fragment)	Ixodes ricinus PE	0	0	1	4
V5I235	Putative ranbp-type and c3hc4-type zinc finger-containing protein 1 (Fragment)	Ixodes ricinus PE	11	12	0	6
B7P5Y8	Dicer-1, putative	Ixodes scapularis GN	3	8	0	4
L7MBI4	Putative tick transposon (Fragment)	Rhipicephalus pulchellus PE	0	9	0	5
L7MAT9	Putative tick transposon (Fragment)	Rhipicephalus pulchellus PE	3	8	0	5
A0A023GDH4	Putative transcription factor 5qnca (Fragment)	Amblyomma triste PE	8	6	0	4
G3MKY6	Putative uncharacterized protein	Amblyomma maculatum PE	3	7	0	5
L7M9D8	Transcription elongation factor SPT5	Rhipicephalus pulchellus PE	0	6	0	5
B7PZV0	Splicing factor 3B subunit, putative (Fragment)	Ixodes scapularis GN	0	6	0	4
L7MAS8	Putative tick transposon (Fragment)	Rhipicephalus pulchellus PE	3	5	0	5
L7MGR1	Putative glutamate receptor (Fragment)	Rhipicephalus pulchellus PE	3	5	0	4
B7Q750	Structural maintenance of chromosomes protein	Ixodes scapularis GN	3	6	0	5
L7LWM9	Putative karyopherin importin beta 3	Rhipicephalus pulchellus PE	1	6	0	4
L7MHN4	Putative tick transposon (Fragment)	Rhipicephalus pulchellus PE	0	5	0	4
B7PII1	Chitin synthase, putative	Ixodes scapularis GN	6	4	0	6
A0A023GG14	Putative enhancer of bithorax	Amblyomma triste PE	8	6	0	6
B7PJL5	Putative uncharacterized protein	Ixodes scapularis GN	4	4	0	4
B7PAX3	Retinal homeobox protein, putative	Ixodes scapularis GN	3	5	0	4
L7MGF3	Putative monocarboxylate transporter (Fragment)	Rhipicephalus pulchellus PE	4	6	0	6
L7MJR0	Uncharacterized protein (Fragment)	Rhipicephalus pulchellus PE	2	4	0	5
L7MGK9	Ubiquitin carboxyl-terminal hydrolase (Fragment)	Rhipicephalus pulchellus PE	2	5	0	4
V5H9N2	Putative wiskott-aldrich syndrome-like a (Fragment)	Ixodes ricinus PE	1	4	0	5
L7M0V9	Uncharacterized protein	Rhipicephalus pulchellus PE	1	4	0	4
B7PQN6	Putative uncharacterized protein	Ixodes scapularis GN	0	4	0	4
A0A023GDR6	Putative peptidylglycine alpha-amidating monooxygenase (Fragment)	Amblyomma triste PE	0	4	0	4
L7MM08	Ubiquitin carboxyl-terminal hydrolase (Fragment)	Rhipicephalus pulchellus PE	4	3	0	4
B7QLH6	Glucose-6-phosphate isomerase	Ixodes scapularis GN	3	4	0	5
V5I3J5	Putative tgf-beta receptor type-1-like isoform 2 (Fragment)	Ixodes ricinus PE	3	3	0	5
A0A023GNS4	Putative transglutaminase/protease-like proteinues	Amblyomma triste PE	3	3	0	5
L7M9A1	Putative cell-cycle and apoptosis regulatory protein 1 strongylocentrotus purpuratus	Rhipicephalus pulchellus PE	3	4	0	4
B7PTD8	Nuclear pore complex protein nup153, putative	Ixodes scapularis GN	4	4	0	7
L7LU86	Putative eukaryotic-type dna primase large subunit	Rhipicephalus pulchellus PE	0	3	0	9
L7MBY5	Uncharacterized protein (Fragment)	Rhipicephalus pulchellus PE	0	4	0	5
B7QAV0	Transforming growth factor-beta receptor type I, putative (Fragment)	Ixodes scapularis GN	0	3	0	5
V5GRA5	Putative pyrophosphate-dependent phosphofructo-1-kinase (Fragment)	Ixodes ricinus PE	0	3	0	4
V5H3V4	Putative conserved plasma membrane protein	Ixodes ricinus PE	2	2	0	4
A0A023GLQ0	Uncharacterized protein (Fragment)	Amblyomma triste PE	1	2	0	4
B7PCQ8	Zinc finger protein, putative	Ixodes scapularis GN	0	2	0	8
A0A023GMZ4	Protein tyrosine phosphatase corkscrew (Fragment)	Amblyomma triste PE	0	2	0	5
V5HML7	Putative nucleolar pre-rrna processing protein	Ixodes ricinus PE	0	4	0	4
L7MEQ5	Putative tick transposon (Fragment)	Rhipicephalus pulchellus PE	4	1	0	4
B7Q6N0	Putative uncharacterized protein	Ixodes scapularis GN	3	1	0	4
L7MEJ6	Putative signaling protein swift (Fragment)	Rhipicephalus pulchellus PE	2	2	0	4
L7MLJ0	Uncharacterized protein (Fragment)	Rhipicephalus pulchellus PE	1	1	0	4
B7QMT0	Putative uncharacterized protein (Fragment)	Ixodes scapularis GN	0	2	0	4
L7M6T8	Putative syntaxin 5a	Rhipicephalus pulchellus PE	0	1	0	4
L7MAD6	Putative atp-dependent rna helicase	Rhipicephalus pulchellus PE	0	1	0	4
B7QFW7	Putative uncharacterized protein	Ixodes scapularis GN	0	1	0	4
G3MPG1	Putative uncharacterized protein	Amblyomma maculatum PE	0	1	0	4
V5HAM5	Uncharacterized protein (Fragment)	Ixodes ricinus PE	0	1	0	4
L7MFI0	Putative monocarboxylate transporter (Fragment)	Rhipicephalus pulchellus PE	0	1	0	4
B7QE74	Transposase, putative	Ixodes scapularis GN	0	1	0	4
V5H827	Putative ankyrin repeat-containing protein (Fragment)	Ixodes ricinus PE	0	1	0	4
L7LWE4	Uncharacterized protein	Rhipicephalus pulchellus PE	6	0	0	4
B7P268	Disco-interacting protein, putative (Fragment)	Ixodes scapularis GN	5	0	0	4
A0A023GNM1	Putative staufen (Fragment)	Amblyomma triste PE	3	0	0	4
V5I2M4	Putative secreted salivary protein salp15 iper-2 (Fragment)	Ixodes ricinus PE	3	0	0	4
G3MJJ1	Putative uncharacterized protein (Fragment)	Amblyomma maculatum PE	7	0	0	7
A0A023GDF5	Putative alanyl-trna synthetase translation (Fragment)	Amblyomma triste PE	4	0	0	5
V5GGA1	Putative transcriptional coactivator	Ixodes ricinus PE	3	0	0	4
B7QFB5	Putative uncharacterized protein	Ixodes scapularis GN	2	0	0	4
A0A023G7B2	Putative mitochondrial ribosomal protein l40	Amblyomma triste PE	2	0	0	4
A0A023G951	Putative tick metalloprotease 1	Amblyomma triste PE	2	0	0	4
Q86RN8	Paramyosin	Rhipicephalus microplus GN	2	0	0	4
B7PGX8	Putative uncharacterized protein	Ixodes scapularis GN	2	0	0	4
V5GY64	Putative acyl-coa synthetase (Fragment)	Ixodes ricinus PE	2	0	0	4
B7P8B0	Cytochrome C, putative (Fragment)	Ixodes scapularis GN	1	0	0	4
B7QAL3	Peroxinectin, putative	Ixodes scapularis GN	1	0	0	4
A0A023G775	Putative ubiquitin c-terminal hydrolase (Fragment)	Amblyomma triste PE	0	0	0	8
B7PCA7	Putative uncharacterized protein (Fragment)	Ixodes scapularis GN	0	0	0	7
F0J927	Microtubule-binding protein MIP-T3 (Fragment)	Amblyomma variegatum PE	0	0	0	7
V5IBR8	Putative rna methylase	Ixodes ricinus PE	0	0	0	7
B7PPQ5	Signal recognition particle receptor, putative (Fragment)	Ixodes scapularis GN	0	0	0	6
V5HGX9	Putative vesicle coat complex copii subunit sec31 (Fragment)	Ixodes ricinus PE	0	0	0	6
B7Q3L1	Rho guanine exchange factor, putative	Ixodes scapularis GN	0	0	0	5
B7QDM5	Zinc finger protein, putative	Ixodes scapularis GN	0	0	0	5
B7PKW0	Putative uncharacterized protein (Fragment)	Ixodes scapularis GN	0	0	0	5
V5HYN1	Putative ca2+/calmodulin-dependent protein kinase ii	Ixodes ricinus PE	0	0	0	5
V5H7B6	Putative histone deacetylase complex (Fragment)	Ixodes ricinus PE	0	0	0	5
A0A023FXD0	Putative reproduction	Amblyomma parvum PE	0	0	0	5
L7LWM1	Putative secreted protein	Rhipicephalus pulchellus PE	0	0	0	4
L7MIG6	Putative tick transposon (Fragment)	Rhipicephalus pulchellus PE	0	0	0	4
L7LTM1	Putative heptalaris	Rhipicephalus pulchellus PE	0	0	0	4
L7LVA3	Putative e3 ubiquitin ligase	Rhipicephalus pulchellus PE	0	0	0	4
B7PSP3	Tyrosine protein kinase, putative (Fragment)	Ixodes scapularis GN	0	0	0	4
B7PX88	Nuclear inhibitor of protein phosphatase-1, putative	Ixodes scapularis GN	0	0	0	4
B7P0P3	85 kD calcium-independent phospholipase A2, putative (Fragment)	Ixodes scapularis GN	0	0	0	4
B7PFL5	Urease, putative (Fragment)	Ixodes scapularis GN	0	0	0	4
B7QF51	Amyloid binding protein, putative (Fragment)	Ixodes scapularis GN	0	0	0	4
B7P1M4	Zinc finger protein, putative	Ixodes scapularis GN	0	0	0	4
B7QH07	Cytoplasmic dynein heavy chain, putative	Ixodes scapularis GN	0	0	0	4
B7Q6U0	Putative uncharacterized protein	Ixodes scapularis GN	0	0	0	4
B7QII6	Translation initiation factor 3, subunit B, putative	Ixodes scapularis GN	0	0	0	4
V5H787	Putative pre-initiation complex subunit cdc6 aaa+ superfamily atpase (Fragment)	Ixodes ricinus PE	0	0	0	4
V5HUU4	Putative dimethylglycine dehydrogenase (Fragment)	Ixodes ricinus PE	0	0	0	4
V5GGM8	Putative actin family protein	Ixodes ricinus PE	0	0	0	4
A0A023FW32	Putative integrator complex subunit 1	Amblyomma parvum PE	0	0	0	4
A0A023GMK6	Putative anaphase-promoting complex apc subunit 1 meiotic check point regulator/tsg24	Amblyomma triste PE	0	0	0	4
A0A034WXM1	Secreted protein 24	Rhipicephalus microplus PE	0	0	0	4
L7M3D5	Putative inhibitor of type v adenylyl cyclase/neuronal presynaptic protein highwire/pam/rpm-1	Rhipicephalus pulchellus PE	9	21	19	7
V5H9B0	Putative negative regulator of transcription	Ixodes ricinus PE	4	4	10	3
B7QCH6	Putative uncharacterized protein	Ixodes scapularis GN	4	6	8	3
A0A023G0E1	Putative vitellogenin-2	Amblyomma parvum PE	8	4	11	3
L7M5U5	Putative bifunctional glutamate/proline--trna ligase	Rhipicephalus pulchellus PE	7	4	7	3
E2J6X4	Ribosomal protein S4 (Fragment)	Hyalomma marginatum rufipes PE	0	0	8	3
B7QL72	Zinc finger protein, putative	Ixodes scapularis GN	4	8	6	3
V5HDP0	Putative calcium-transporting atpase sarcoplasmic/endoplasmic reticulum type (Fragment)	Ixodes ricinus PE	3	6	6	3
A0A023FX16	Putative kinesin smy1 subfamily protein	Amblyomma parvum PE	3	4	6	4
A0A023GGM1	Putative atp-citrate lyase	Amblyomma triste PE	6	3	6	3
V5HT91	Putative arp2/3 complex-interacting protein vip1/asp1 involved in regulation of actin cytoskeleton	Ixodes ricinus PE	4	4	7	3
A0A023GM89	Uncharacterized protein (Fragment)	Amblyomma triste PE	3	6	8	4
L7MB71	Uncharacterized protein	Rhipicephalus pulchellus PE	3	3	6	4
B7P4X9	Phosphoinositide phospholipase C (Fragment)	Ixodes scapularis GN	5	4	6	3
B7Q340	Putative uncharacterized protein	Ixodes scapularis GN	2	3	6	3
L7LV55	Putative tick transposon	Rhipicephalus pulchellus PE	3	2	6	4
L7MLL8	Putative phosphoinositide phosphatase (Fragment)	Rhipicephalus pulchellus PE	3	0	11	5
L7MBL7	Putative pleckstrin logy domain-containing family f member 2 (Fragment)	Rhipicephalus pulchellus PE	2	0	8	3
L7M038	3-hydroxy-3-methylglutaryl coenzyme A reductase	Rhipicephalus pulchellus PE	3	0	6	3
L7MFW5	Putative metabolic process (Fragment)	Rhipicephalus pulchellus PE	2	0	6	3
A0A023FT54	Histone H4 (Fragment)	Amblyomma parvum PE	0	0	9	4
L7M706	Putative oligomycin sensitivity-conferring protein	Rhipicephalus pulchellus PE	5	10	6	3
L7M7R7	Putative atp synthase subunit b	Rhipicephalus pulchellus PE	4	8	6	3
B7P483	Putative uncharacterized protein	Ixodes scapularis GN	3	6	5	3
V5GWQ1	Putative grip and coiled-coil domain protein (Fragment)	Ixodes ricinus PE	3	6	5	3
V5H8H9	Putative rna polymerase ii-associated protein 1 (Fragment)	Ixodes ricinus PE	0	7	8	4
L7LX05	Putative kinesin family member 21a	Rhipicephalus pulchellus PE	0	6	5	3
L7LU40	Putative deah-box rna helicase	Rhipicephalus pulchellus PE	6	5	5	3
L7M8W5	Uncharacterized protein	Rhipicephalus pulchellus PE	5	8	5	6
B7Q2M9	Putative uncharacterized protein (Fragment)	Ixodes scapularis GN	6	4	5	3
L7MFB5	DNA polymerase (Fragment)	Rhipicephalus pulchellus PE	3	6	5	4
B7QJX8	Transcription factor L2, putative	Ixodes scapularis GN	5	5	5	4
A0A023GEY4	Putative stress-induced phosphoprotein 1 (Fragment)	Amblyomma triste PE	7	5	5	3
A0A023GMX1	Putative dolichyl-diphosphooligosaccharide--protein glycosyltransferase subunit 2	Amblyomma triste PE	3	4	6	3
V5IED0	Uncharacterized protein	Ixodes ricinus PE	0	3	5	3
B7PNC0	Putative uncharacterized protein (Fragment)	Ixodes scapularis GN	3	2	5	3
A0A023G898	Putative ataq protein	Amblyomma triste PE	3	3	6	3
V5HZ76	DNA-directed RNA polymerase (Fragment)	Ixodes ricinus PE	2	2	5	3
B7PHI0	Putative uncharacterized protein	Ixodes scapularis GN	0	2	5	7
V5HKN2	Protein serine/threonine kinase (Fragment)	Ixodes ricinus PE	0	2	5	3
B7PE14	Bromodomain-containing protein, putative	Ixodes scapularis GN	0	1	6	3
V5I3J7	Protein phosphatase 1	Ixodes ricinus PE	5	0	5	3
L7MMF6	Putative rna polymerase ii elongator complex subunit elp3/histone acetyltransferase (Fragment)	Rhipicephalus pulchellus PE	3	0	5	3
L7LTS5	Putative zinc finger protein	Rhipicephalus pulchellus PE	0	0	7	5
A0A023G714	Putative 40s ribosomal protein s19 (Fragment)	Amblyomma triste PE	0	0	5	4
B7PUU2	tRNA-dihydrouridine synthase, putative	Ixodes scapularis GN	0	0	6	3
L7M3E3	Putative tripeptidylpeptidase ii strongylocentrotus purpuratus : similar to tripeptidylpeptidase ii	Rhipicephalus pulchellus PE	0	0	6	3
L7LU59	Putative secreted mucin muc17	Rhipicephalus pulchellus PE	7	8	4	3
B7P8Q2	ABC transporter, putative (Fragment)	Ixodes scapularis GN	5	7	5	3
L7LUW5	Putative secreted mucin muc17	Rhipicephalus pulchellus PE	5	7	4	3
B7Q8Z4	WD-repeat protein, putative (Fragment)	Ixodes scapularis GN	4	7	4	3
V5HJN9	Putative mitochondrial tricarboxylate/dicarboxylate carrier	Ixodes ricinus PE	10	7	4	3
G3MKY2	Putative uncharacterized protein	Amblyomma maculatum PE	6	7	5	3
B7PN77	Myosin heavy chain, putative	Ixodes scapularis GN	2	6	4	3
V5HPH1	Putative myosin class v heavy chain	Ixodes ricinus PE	4	5	4	3
F0J9Z3	RAS oncogene family member RAB1	Amblyomma variegatum PE	4	6	5	3
L7M6I8	Putative ribosomal protein s13	Rhipicephalus pulchellus PE	2	7	5	4
L7MAQ7	Uncharacterized protein (Fragment)	Rhipicephalus pulchellus PE	1	5	4	4
A0A023GMD1	Putative traf2-and nck-interacting kinase	Amblyomma triste PE	1	5	4	3
V5H7S2	DNA ligase	Ixodes ricinus PE	6	4	4	3
B7Q168	Putative uncharacterized protein (Fragment)	Ixodes scapularis GN	8	7	10	9
V5HEX4	Putative long-chain-acyl-coa synthetase	Ixodes ricinus PE	6	6	6	5
B7P617	Putative uncharacterized protein	Ixodes scapularis GN	5	5	4	3
B7P7Y2	Putative uncharacterized protein	Ixodes scapularis GN	2	4	5	6
V5HH80	Putative proteasome (Fragment)	Ixodes ricinus PE	2	5	5	3
L7MAQ1	Putative cytochrome b-c1 complex subunit 2 mitochondrial	Rhipicephalus pulchellus PE	2	4	4	3
A0A023FFQ7	Putative growth arrest and dna-damage-inducible protein-interacting protein 1 (Fragment)	Amblyomma cajennense PE	2	4	4	3
V5IHG7	Putative phosphorylase kinase (Fragment)	Ixodes ricinus PE	0	5	5	4
L7LZV6	Putative vesicle-fusing atpase 2	Rhipicephalus pulchellus PE	0	4	4	3
B7PA72	Heat domain-containing protein, putative (Fragment)	Ixodes scapularis GN	0	4	4	3
A0A023GNV2	Putative vesicle coat complex ap-2 alpha subunit	Amblyomma triste PE	7	4	4	3
G3MM77	Putative uncharacterized protein	Amblyomma maculatum PE	3	3	6	7
B7PJ10	Neurogenic locus notch, putative	Ixodes scapularis GN	3	4	5	3
V5HZ43	Putative ste20-like serine/threonine-protein kinase (Fragment)	Ixodes ricinus PE	2	3	4	3
V5H2D9	Putative calcium ion binding protein	Ixodes ricinus PE	0	5	4	3
L7M778	Putative phosphatidylinositol 3-phosphate 3-phosphatase myotubularin mtm1	Rhipicephalus pulchellus PE	0	4	4	3
A0A023FNG7	Alpha-1,4 glucan phosphorylase (Fragment)	Amblyomma cajennense PE	0	3	4	3
A0A023G7N4	Putative tick metalloprotease 31 (Fragment)	Amblyomma triste PE	0	3	4	3
A0A023GCA7	Putative vitellogenin-2 (Fragment)	Amblyomma triste PE	7	2	8	9
G3MGH8	Putative uncharacterized protein (Fragment)	Amblyomma maculatum PE	4	2	4	3
V5HU03	Nucleolar GTP-binding protein 1	Ixodes ricinus PE	4	4	5	3
V5IE83	Uncharacterized protein (Fragment)	Ixodes ricinus PE	4	3	5	3
L7MCR1	Putative run domain-containing protein (Fragment)	Rhipicephalus pulchellus PE	3	2	4	3
B7PNE2	Cysteinyl-tRNA synthetase, putative	Ixodes scapularis GN	1	3	4	4
B7QNL3	Aspartic protease, putative	Ixodes scapularis GN	0	2	4	4
A0A023FC75	Annexin (Fragment)	Amblyomma cajennense PE	0	2	5	3
B7PZH8	UDP-N-acetylglucosamine pyrophosphorylase, putative (Fragment)	Ixodes scapularis GN	0	2	5	3
L7LWZ4	Putative nuclear pore complex protein nup85	Rhipicephalus pulchellus PE	0	4	4	3
B7PIN0	Hipk, putative	Ixodes scapularis GN	6	1	5	3
A0A023FKT5	Putative ubiquinol cytochrome c reductase subunit qcr2 (Fragment)	Amblyomma cajennense PE	3	3	5	4
B7Q8N8	Zinc-finger protein, putative	Ixodes scapularis GN	2	1	4	3
V5HY20	Putative e3 ubiquitin-protein ligase rfwd2 (Fragment)	Ixodes ricinus PE	2	1	4	3
L7MKR7	Phosphoinositide phospholipase C (Fragment)	Rhipicephalus pulchellus PE	1	0	4	5
B7QHM7	Putative uncharacterized protein	Ixodes scapularis GN	1	0	6	3
A0A023FFT9	Putative nucleolar serine-rich protein (Fragment)	Amblyomma cajennense PE	1	0	5	3
L7M4V8	Putative helicase arip4	Rhipicephalus pulchellus PE	0	0	6	6
A0A023FEG2	Putative 40s ribosomal protein s10	Amblyomma cajennense PE	0	0	6	4
L7MIF1	Putative udp-gal:glucosylceramide beta-14-galactosyltransferase (Fragment)	Rhipicephalus pulchellus PE	0	0	4	4
B7PBG9	Putative uncharacterized protein	Ixodes scapularis GN	0	0	4	4
A6N9S3	Serum amyloid A protein-like	Ornithodoros parkeri PE	0	0	4	4
B7PAJ2	Histone H3	Ixodes scapularis GN	0	0	5	3
L7MAC6	Putative glutamate/leucine/phenylalanine/valine dehydrogenase	Rhipicephalus pulchellus PE	0	0	4	3
L7LSI2	Putative lysine-ketoglutarate reductase/saccharopine dehydrogenase	Rhipicephalus pulchellus PE	0	0	4	3
A0A023FUH8	Putative ribosomal protein l26e strongylocentrotus purpuratus	Amblyomma parvum PE	0	0	4	3
A0A023G5Y4	Putative neural cell adhesion molecule l1 (Fragment)	Amblyomma triste PE	0	0	4	3
A0A023FP41	Putative vesicle coat complex copi alpha subunit (Fragment)	Amblyomma cajennense PE	0	0	4	3
L7M6J5	Putative calmodulin regulated spectrin-associated protein family member 2	Rhipicephalus pulchellus PE	5	11	3	6
A0A023GKA4	Putative ubiquinol cytochrome c reductase subunit qcr2	Amblyomma triste PE	5	7	3	3
A0A023GBL7	Putative deddy 3'-5' exonuclease domain of egalitarian	Amblyomma triste PE	4	7	4	4
V5I3A0	Uncharacterized protein (Fragment)	Ixodes ricinus PE	0	6	4	3
L7LWR9	Uncharacterized protein	Rhipicephalus pulchellus PE	4	5	3	3
L7M9D4	Putative serine carboxypeptidase	Rhipicephalus pulchellus PE	4	7	4	3
B7P7P1	Tnf receptor associated factor, putative	Ixodes scapularis GN	0	7	4	4
L7M6S1	Putative heat shock-related protein	Rhipicephalus pulchellus PE	8	6	4	3
L7LUP8	Uncharacterized protein	Rhipicephalus pulchellus PE	4	4	3	3
A0A023GM57	Putative glycine rich secreted cement protein (Fragment)	Amblyomma triste PE	3	5	3	9
L7LV90	Uncharacterized protein	Rhipicephalus pulchellus PE	4	5	3	4
A0A023GL00	Putative ribosome bioproteinsis protein	Amblyomma triste PE	4	4	5	3
L7MGH9	Putative microtubule associated complex (Fragment)	Rhipicephalus pulchellus PE	3	4	5	3
L7M9L7	Putative atp-dependent rna helicase	Rhipicephalus pulchellus PE	3	5	4	3
M4GYH8	Translation elongation factor EF-1 alpha-u (Fragment)	Antricola delacruzi PE	3	5	5	6
L7M7K4	Putative adhesion regulating molecule	Rhipicephalus pulchellus PE	2	4	3	4
B7P2T5	39S ribosomal protein L44, putative	Ixodes scapularis GN	4	7	4	3
B7P4P2	Sulfotransferase, putative	Ixodes scapularis GN	1	6	4	3
A0A023GP20	Putative dipeptidyl peptidase iii ixodes scapularis dipeptidyl peptidase iii	Amblyomma triste PE	2	4	4	3
G3MTU2	Putative uncharacterized protein	Amblyomma maculatum PE	0	5	4	5
L7LX79	Putative choline transporter-like protein	Rhipicephalus pulchellus PE	0	4	3	3
V5IK05	Putative transferase transferring acyl groups (Fragment)	Ixodes ricinus PE	5	4	4	5
G3MNM0	Putative uncharacterized protein	Amblyomma maculatum PE	5	5	3	4
B7PIA6	Putative uncharacterized protein	Ixodes scapularis GN	4	5	4	5
B7P1R2	Isoleucyl tRNA synthetase, putative	Ixodes scapularis GN	3	3	5	3
L7M7Q3	Putative flotillin	Rhipicephalus pulchellus PE	3	3	3	3
B7PNX4	NADH:ubiquinone oxidoreductase, NDUFV1/51kDa subunit, putative	Ixodes scapularis GN	3	3	4	3
B7PQ21	DEAD box ATP-dependent RNA helicase, putative (Fragment)	Ixodes scapularis GN	2	3	3	3
L7M153	Putative tick transposon	Rhipicephalus pulchellus PE	2	3	3	3
A0A023FGZ3	Putative cop9 signalosome subunit csn7	Amblyomma cajennense PE	1	5	5	4
A0A023GD42	Putative enoyl-coa hydratase/isomerase	Amblyomma triste PE	1	4	3	3
A0A023FX06	60S ribosomal protein L18	Amblyomma parvum PE	1	3	3	3
L7LW07	Putative cap	Rhipicephalus pulchellus PE	0	3	3	4
V5HDD5	Putative microtubule associated complex (Fragment)	Ixodes ricinus PE	0	4	3	3
A0A023G612	Putative outcast ele5 orf1-h 1e-40-j 4 (Fragment)	Amblyomma triste PE	0	3	3	3
A0A023GGK0	Uncharacterized protein	Amblyomma triste PE	0	3	3	3
A0A023GP56	Putative otu-like cysteine protease (Fragment)	Amblyomma triste PE	4	2	3	3
L7M1G2	Alpha-mannosidase	Rhipicephalus pulchellus PE	3	2	3	5
V5HYE3	Putative nad synthase	Ixodes ricinus PE	3	2	3	3
L7LYW4	Putative tetratricopeptide repeat protein 1	Rhipicephalus pulchellus PE	4	3	7	7
B7QP08	Putative uncharacterized protein	Ixodes scapularis GN	4	3	6	3
B7QCL5	Metabotropic glutamate receptor 4, 6, 7, putative	Ixodes scapularis GN	4	3	4	3
L7LX78	Putative poly adp-ribose polymerase 1	Rhipicephalus pulchellus PE	2	2	3	3
V5GYD4	Uncharacterized protein	Ixodes ricinus PE	1	3	3	3
B7PCQ4	Putative uncharacterized protein	Ixodes scapularis GN	0	7	4	6
L7LUD9	Putative short gastrulation	Rhipicephalus pulchellus PE	0	2	4	5
L7LY55	Uncharacterized protein	Rhipicephalus pulchellus PE	0	3	3	5
G3MTG8	Putative uncharacterized protein	Amblyomma maculatum PE	0	2	3	5
G3MRS0	Putative uncharacterized protein	Amblyomma maculatum PE	0	2	3	4
L7MJF5	Putative glycosyltransferase family 10 (Fragment)	Rhipicephalus pulchellus PE	0	2	4	3
A0A023GNF4	Putative delta-1-pyrroline-5-carboxylate dehydrogenase	Amblyomma triste PE	0	3	3	3
A0A023FKK6	Putative 60s ribosomal protein l7a	Amblyomma cajennense PE	0	2	3	3
L7MF04	Uncharacterized protein (Fragment)	Rhipicephalus pulchellus PE	0	2	3	3
B7PAV8	Putative uncharacterized protein	Ixodes scapularis GN	0	2	3	3
G3MGD6	Putative uncharacterized protein (Fragment)	Amblyomma maculatum PE	0	2	3	3
L7LUI3	Putative aromatic-l-amino-acid/l-histidine decarboxylase	Rhipicephalus pulchellus PE	0	2	3	3
V5HVY8	Putative vacuolar sorting protein vps1 dynamin	Ixodes ricinus PE	0	2	3	3
V5IJW2	Putative regulation of transcription (Fragment)	Ixodes ricinus PE	2	1	4	6
B7P4N4	Vacuolar protein-sorting protein, putative	Ixodes scapularis GN	3	1	3	3
B7QBF0	ABC transporter, putative (Fragment)	Ixodes scapularis GN	2	1	3	5
L7LZE3	Putative tick transposon	Rhipicephalus pulchellus PE	1	1	4	3
B7PSR1	Putative uncharacterized protein	Ixodes scapularis GN	0	1	3	4
G3MMH2	Putative uncharacterized protein	Amblyomma maculatum PE	0	2	6	3
B7PXE3	Spastin	Ixodes scapularis GN	0	1	3	3
G3MHN3	Putative uncharacterized protein (Fragment)	Amblyomma maculatum PE	0	1	3	3
B7QIC2	Putative uncharacterized protein	Ixodes scapularis GN	0	1	3	3
A0A023FQ47	Putative secreted protein (Fragment)	Amblyomma cajennense PE	5	0	3	5
V5HU62	Uncharacterized protein (Fragment)	Ixodes ricinus PE	2	0	4	3
L7MKG1	Uncharacterized protein (Fragment)	Rhipicephalus pulchellus PE	2	0	3	3
B7PN23	Neurobeachin, putative	Ixodes scapularis GN	2	0	3	3
L7MBU1	Putative amblyomma 40-33 family member	Rhipicephalus pulchellus PE	2	0	3	3
L7LYI1	Putative mediator complex subunit 14	Rhipicephalus pulchellus PE	2	0	3	3
B7P7M2	Signal recognition particle subunit SRP72	Ixodes scapularis GN	0	0	4	7
Q2PGH4	Metalloprotease (Fragment)	Haemaphysalis longicornis GN	0	0	6	4
V5IGX3	Putative xaa-pro aminopeptidase (Fragment)	Ixodes ricinus PE	0	0	4	4
B7P4F7	Putative uncharacterized protein	Ixodes scapularis GN	0	0	3	4
B7Q5T8	Coagulation factor, putative	Ixodes scapularis GN	0	0	4	3
B7PSM7	Putative uncharacterized protein	Ixodes scapularis GN	0	0	4	3
L7MFA3	Putative sterol regulatory element-binding protein 1 (Fragment)	Rhipicephalus pulchellus PE	0	0	3	3
L7MLS7	Putative tick transposon (Fragment)	Rhipicephalus pulchellus PE	0	0	3	3
B7P595	Proline and glutamine-rich splicing factor (SFPQ), putative	Ixodes scapularis GN	0	0	3	3
B7P1I7	Exostosin-2, putative (Fragment)	Ixodes scapularis GN	0	0	3	3
A0A023FWB2	Putative 26s proteasome regulatory complex atpase rpt1	Amblyomma parvum PE	0	0	3	3
A0A023FGT6	Putative dolichyl-diphosphooligosaccharide--protein glycosyltransferase subunit stt3b	Amblyomma cajennense PE	0	0	3	3
L7LUA6	Uncharacterized protein	Rhipicephalus pulchellus PE	0	0	3	3
B7PCZ6	Putative uncharacterized protein	Ixodes scapularis GN	0	0	3	3
V5HWW3	Putative transcription factor hes-1-b (Fragment)	Ixodes ricinus PE	0	0	3	3
G3MLP6	Putative uncharacterized protein	Amblyomma maculatum PE	3	8	2	4
B7QCN1	Putative uncharacterized protein	Ixodes scapularis GN	1	6	2	3
L7M5X0	Putative secreted/periplasmic zn-dependent peptidase	Rhipicephalus pulchellus PE	6	5	2	3
A0A023FKE7	Putative metalloexopeptidase	Amblyomma cajennense PE	6	8	7	5
B7PHN8	Histone transcription regulator, putative	Ixodes scapularis GN	5	7	4	4
B7Q9L8	Putative uncharacterized protein	Ixodes scapularis GN	2	6	4	6
V5IJU7	Putative chaperonin complex component tcp-1 zeta subunit cct6 (Fragment)	Ixodes ricinus PE	3	6	3	3
V5HF66	Putative gtpase-activating protein (Fragment)	Ixodes ricinus PE	2	6	2	3
V5HBK6	Putative mucin-5ac (Fragment)	Ixodes ricinus PE	4	5	3	3
B7PD79	Potassium channel, putative (Fragment)	Ixodes scapularis GN	3	4	2	3
V5H3T4	Putative acyl-coa reductase (Fragment)	Ixodes ricinus PE	3	4	2	3
L7MIJ1	Putative pheromone and odorant receptor (Fragment)	Rhipicephalus pulchellus PE	4	6	2	4
V5HR87	Protein osteopotentia log isoform 2 (Fragment)	Ixodes ricinus PE	1	4	2	3
B7Q362	Eukaryotic translation initiation factor 4 gamma, putative (Fragment)	Ixodes scapularis GN	0	4	3	5
A0A023GDI9	Putative histone acetyltransferase saga trrap/tra1 component pi-3 kinase superfamily	Amblyomma triste PE	0	4	2	3
L7LZN1	tRNA (guanine(37)-N1)-methyltransferase	Rhipicephalus pulchellus PE	6	4	3	4
L7M711	Putative oligophrenin-1	Rhipicephalus pulchellus PE	5	4	2	3
L7LZ47	Uncharacterized protein	Rhipicephalus pulchellus PE	8	3	5	5
F0J8E2	Serine proteinase inhibitor (Fragment)	Amblyomma variegatum PE	4	3	3	4
V5GET0	Putative copper-transporting atpase 1 (Fragment)	Ixodes ricinus PE	4	3	3	3
G3MHA6	Putative uncharacterized protein (Fragment)	Amblyomma maculatum PE	3	3	2	3
A0A023FYF0	Putative mitochondrial ribosomal protein s28 (Fragment)	Amblyomma parvum PE	3	6	5	6
B7PDZ5	Alpha-D-galactosidase, putative	Ixodes scapularis GN	2	3	3	5
L7LYN0	Uncharacterized protein	Rhipicephalus pulchellus PE	2	4	2	3
L7MLM8	Putative ribosomal pseudouridine synthase (Fragment)	Rhipicephalus pulchellus PE	2	3	2	3
V5IJA7	Uncharacterized protein (Fragment)	Ixodes ricinus PE	1	3	2	3
B7P153	M20 domain-containing peptidase, putative	Ixodes scapularis GN	0	3	2	4
L7M2J9	Putative serine/threonine-protein kinase tricorner	Rhipicephalus pulchellus PE	0	4	2	3
A0A023GN77	Putative conserved secreted protein	Amblyomma triste PE	0	4	2	3
L7LWA8	Uncharacterized protein	Rhipicephalus pulchellus PE	0	3	2	3
V5HVW3	Putative vesicle transport protein use1	Ixodes ricinus PE	0	3	2	3
V5I2R3	Putative e3 ubiquitin ligase	Ixodes ricinus PE	4	2	2	5
A0A023GDF7	Putative dual serine/threonine and tyrosine protein kinase	Amblyomma triste PE	4	2	3	3
B7PXP4	Hsp70, putative (Fragment)	Ixodes scapularis GN	4	2	2	3
A0A023FWH1	Putative rna-binding protein nob1p involved in 26s proteasome assembly (Fragment)	Amblyomma parvum PE	3	4	2	10
B7PVW7	Cytochrome P450, putative	Ixodes scapularis GN	2	3	3	5
E9MYP5	P2X purinoceptor	Rhipicephalus microplus PE	2	3	3	3
V5H4Y4	Uncharacterized protein (Fragment)	Ixodes ricinus PE	2	3	3	3
V5HDQ6	Uncharacterized protein (Fragment)	Ixodes ricinus PE	3	2	2	3
V5HQ33	Uncharacterized protein	Ixodes ricinus PE	1	2	3	3
L7LU61	Putative methionyl-trna formyltransferase	Rhipicephalus pulchellus PE	2	3	2	3
A0A023FIC8	Uncharacterized protein (Fragment)	Amblyomma cajennense PE	1	2	2	3
A0A023GJ62	Putative ribose 5-phosphate isomerase	Amblyomma triste PE	0	6	11	7
L7LUR7	Putative spou rrna methylase family protein	Rhipicephalus pulchellus PE	0	3	2	4
L7M9R5	Putative cell wall protein awa1	Rhipicephalus pulchellus PE	0	2	2	4
G3MQQ8	Putative uncharacterized protein	Amblyomma maculatum PE	0	2	2	4
V5HHS2	Putative tnf receptor-associated factor 4 (Fragment)	Ixodes ricinus PE	0	3	2	3
B7P2U2	Putative uncharacterized protein	Ixodes scapularis GN	0	2	2	3
L7LUL4	Putative vacuolar sorting protein 9	Rhipicephalus pulchellus PE	0	2	2	3
L7LT98	Putative aromatic-l-amino-acid/l-histidine decarboxylase	Rhipicephalus pulchellus PE	0	2	2	3
L7MIU4	Putative actin-binding cytoskeleton protein filamin (Fragment)	Rhipicephalus pulchellus PE	0	2	2	3
B7Q520	Protein 4.1G, putative	Ixodes scapularis GN	3	1	3	3
V5HZF8	Putative n-acetylglucosaminyltransferase (Fragment)	Ixodes ricinus PE	3	1	2	4
A0A023FZM3	Uncharacterized protein (Fragment)	Amblyomma parvum PE	3	1	3	3
V5H5M4	Putative anaphase-promoting complex apc cdc23 subunit (Fragment)	Ixodes ricinus PE	2	1	3	3
V5HMK1	Putative conserved plasma membrane protein (Fragment)	Ixodes ricinus PE	2	1	2	3
V5HC01	Putative ankyrin repeat-containing protein	Ixodes ricinus PE	2	2	2	3
A0A023FCV1	Putative ixodegrins large 4	Amblyomma cajennense PE	1	2	2	3
A0A023GLV1	Putative mitochondrial assembly regulatory factor	Amblyomma triste PE	0	1	2	4
L7MAE3	Putative nad+ adp-ribosyltransferase-3-like protein strongylocentrotus purpuratus (Fragment)	Rhipicephalus pulchellus PE	0	1	2	4
L7M2G8	Putative mitochondrial glycerol-3-phosphate acyltransferase gpat	Rhipicephalus pulchellus PE	0	2	3	3
V5H0S2	Putative golgin subfamily protein a member 5	Ixodes ricinus PE	0	1	2	3
V5HXG1	Putative tick metalloprotease (Fragment)	Ixodes ricinus PE	0	1	2	3
L7MJU1	Putative tick transposon (Fragment)	Rhipicephalus pulchellus PE	0	1	2	3
L7M5Z0	Putative nuclear transport receptor crm1/msn5 importin beta superfamily	Rhipicephalus pulchellus PE	5	0	2	3
B7PLT6	ABC transporter, putative	Ixodes scapularis GN	5	0	2	3
L7M9S7	Putative molecular chaperone sec63 endoplasmic reticulum translocon component	Rhipicephalus pulchellus PE	4	0	2	3
V5HVT2	Putative myosin heavy chain striated muscle (Fragment)	Ixodes ricinus PE	5	0	4	4
V5H913	Putative amidase (Fragment)	Ixodes ricinus PE	4	0	2	4
B7PJS1	Putative uncharacterized protein	Ixodes scapularis GN	3	0	2	4
L7LRC0	Putative tritil protein	Rhipicephalus pulchellus PE	6	0	3	3
A0A023GFZ3	Putative ankyrin repeat and fyve domain protein (Fragment)	Amblyomma triste PE	4	0	2	3
A0A023GNJ1	Putative polynucleotide kinase 3' phosphatase	Amblyomma triste PE	3	0	2	3
Q4PN90	Putative secreted WC salivary gland protein	Ixodes scapularis PE	2	0	3	3
G3MPS8	Putative uncharacterized protein	Amblyomma maculatum PE	2	0	3	3
L7MFA7	Putative tick transposon (Fragment)	Rhipicephalus pulchellus PE	3	0	2	3
L7M755	Putative nadh-ubiquinone oxidoreductase ndufs1/75 kDa subunit	Rhipicephalus pulchellus PE	2	0	2	3
B7PBJ6	Serine proteinase inhibitor, putative (Fragment)	Ixodes scapularis GN	2	0	2	3
L7MAI2	Uncharacterized protein	Rhipicephalus pulchellus PE	1	0	2	4
L7LUU5	Putative long-chain acyl-coa transporter abc superfamily involved in peroxisome organization	Rhipicephalus pulchellus PE	1	0	2	3
A0A023GMQ0	Putative fkbp-type peptidyl-prolyl cis-trans isomerase	Amblyomma triste PE	1	0	2	3
B7PT10	Cytochrome P450, putative	Ixodes scapularis GN	1	0	2	3
B7PZG5	Group III secreted phospholipase A2, putative (Fragment)	Ixodes scapularis GN	1	0	2	3
G3MSG3	Putative uncharacterized protein	Amblyomma maculatum PE	1	0	2	3
L7M1B8	Uncharacterized protein	Rhipicephalus pulchellus PE	0	0	4	5
V5IJH7	Putative kunitz-like protease inhibitor (Fragment)	Ixodes ricinus PE	0	0	3	4
L7MF70	Uncharacterized protein (Fragment)	Rhipicephalus pulchellus PE	0	0	2	4
L7LUR5	Uncharacterized protein	Rhipicephalus pulchellus PE	0	0	2	4
A0A023G8A7	Uncharacterized protein (Fragment)	Amblyomma triste PE	0	0	2	4
L7M670	Putative signal transduction	Rhipicephalus pulchellus PE	0	0	2	3
B7PSX9	Tropomyosin invertebrate, putative (Fragment)	Ixodes scapularis GN	0	0	2	3
B7PRX4	Putative uncharacterized protein	Ixodes scapularis GN	0	0	2	3
G3MNN5	Putative uncharacterized protein	Amblyomma maculatum PE	0	0	2	3
V5IG59	Putative dna topoisomerase i-interacting protein (Fragment)	Ixodes ricinus PE	0	0	2	3
A0A023FXW6	Putative tropomyosin tropomyosin (Fragment)	Amblyomma parvum PE	0	0	2	3
A0A023FL96	Putative calcineurin-binding protein cabin-1 (Fragment)	Amblyomma cajennense PE	0	0	2	3
A0A023GG72	Putative nuclear receptor	Amblyomma triste PE	0	0	2	3
A0A023GLA8	Putative deah-box rna helicase (Fragment)	Amblyomma triste PE	0	0	2	3
L7LU34	Putative ribulose kinase	Rhipicephalus pulchellus PE	0	0	2	3
L7MDF4	Putative zinc finger protein 37a (Fragment)	Rhipicephalus pulchellus PE	0	0	2	3
L7M4D0	Putative 20-hydroxysteroid dehydrogenase	Rhipicephalus pulchellus PE	0	0	2	3
B7Q1H7	Negative elongation factor E, putative (Fragment)	Ixodes scapularis GN	0	0	2	3
V5HHR2	Putative cytosolic sorting protein gga2/tom1	Ixodes ricinus PE	0	0	2	3
A0A023FVY9	Putative ribosomal protein s25 (Fragment)	Amblyomma parvum PE	0	0	2	3
A0A023GE00	Putative conserved secreted protein (Fragment)	Amblyomma triste PE	0	0	2	3
B7P4U4	Lupus La ribonucleoprotein, putative	Ixodes scapularis GN	0	0	2	3
F0J8N9	Ecdysone-induced protein 63F 1 (Fragment)	Amblyomma variegatum PE	0	0	2	3
L7M1M7	Putative puf family rna-binding protein	Rhipicephalus pulchellus PE	3	6	1	3
V5ICN2	Putative secreted protein	Ixodes ricinus PE	2	5	1	3
V5HU59	Putative ribosome bioproteinsis protein nsa2	Ixodes ricinus PE	0	5	1	4
B7P3Q1	DEAD box protein abstrakt, putative	Ixodes scapularis GN	10	4	1	5
L7MCE3	Putative mitochondrial import inner membrane translocase subunit tim44 (Fragment)	Rhipicephalus pulchellus PE	5	4	1	3
B7Q0B4	Extended synaptotagmin-2, putative (Fragment)	Ixodes scapularis GN	4	5	1	3
A0A023GLR9	Protein required for actin cytoskeleton organization and cell cycle progression (Fragment)	Amblyomma triste PE	2	4	1	3
B7PB11	Putative uncharacterized protein	Ixodes scapularis GN	2	6	3	6
B7PKZ7	Adipocyte plasma membrane-associated protein, putative	Ixodes scapularis GN	0	5	1	3
A0A023FUT8	Triosephosphate isomerase	Amblyomma parvum PE	3	5	1	5
V5HZJ2	Putative lysine-specific demethylase 5b (Fragment)	Ixodes ricinus PE	0	3	1	4
G3MLP1	Putative uncharacterized protein	Amblyomma maculatum PE	0	3	1	3
A0A023FKC9	Putative calpain-b	Amblyomma cajennense PE	0	3	1	3
B7Q8B3	8-oxoguanine DNA glycosylase, putative	Ixodes scapularis GN	0	3	1	3
B7QP14	Protein CLEC16A, putative (Fragment)	Ixodes scapularis GN	0	3	1	3
A0A023FZM7	Uncharacterized protein	Amblyomma parvum PE	0	3	1	3
V5HVZ6	Putative max-binding protein mnt (Fragment)	Ixodes ricinus PE	0	3	1	3
V5IBY1	Putative h+/cl-exchange transporter 3	Ixodes ricinus PE	3	2	3	3
A0A034WXH1	Vitellogenin 5 (Fragment)	Rhipicephalus microplus PE	3	2	2	3
V5GZ43	Uncharacterized protein	Ixodes ricinus PE	3	3	2	4
B7Q8R2	Pyrroline-5-carboxylate reductase	Ixodes scapularis GN	2	3	3	5
L7MDJ4	Putative retinitis pigmentosa gtpase regulator (Fragment)	Rhipicephalus pulchellus PE	1	2	1	3
L7M8H1	Putative group i salivary lipocalin	Rhipicephalus pulchellus PE	0	3	1	7
A0A023GN99	Putative atpase	Amblyomma triste PE	0	4	2	4
B7QDX8	Amino acid transporter, putative	Ixodes scapularis GN	0	2	1	4
V5HV65	Putative oxysterol-binding protein	Ixodes ricinus PE	0	3	1	3
A0A023FUJ8	Putative 39s ribosomal protein	Amblyomma parvum PE	0	2	1	3
A0A023FKN8	Fructose-bisphosphate aldolase	Amblyomma cajennense PE	0	2	1	3
B7PN04	Putative uncharacterized protein	Ixodes scapularis GN	5	1	1	3
B7PZF0	ATP-dependent RNA helicase, putative	Ixodes scapularis GN	2	1	1	5
A0A023FK71	Putative prolactin regulatory element-binding protein (Fragment)	Amblyomma cajennense PE	1	2	3	3
G3MHL8	Putative uncharacterized protein (Fragment)	Amblyomma maculatum PE	1	1	1	3
L7MDE5	Putative serine carboxypeptidase (Fragment)	Rhipicephalus pulchellus PE	0	1	1	7
L7M7A5	Putative rna pseudouridylate synthase	Rhipicephalus pulchellus PE	0	1	2	3
A0A023FQ60	alpha-1,2-Mannosidase	Amblyomma cajennense PE	0	1	2	3
L7MG00	Glutathione peroxidase (Fragment)	Rhipicephalus pulchellus PE	0	1	2	3
B7QKX0	Putative uncharacterized protein	Ixodes scapularis GN	0	1	1	3
B7PM78	Engulfment and cell motility, putative	Ixodes scapularis GN	0	1	1	3
B7Q788	Peritrophic membrane chitin binding protein, putative (Fragment)	Ixodes scapularis GN	0	1	1	3
L7M8Q9	Putative mitochondrial ribosomal protein l38	Rhipicephalus pulchellus PE	0	1	1	3
V5IEC2	Putative zinc finger protein 84	Ixodes ricinus PE	0	1	1	3
G3MTW5	Putative uncharacterized protein	Amblyomma maculatum PE	0	1	1	3
L7MGN6	Putative tomosyn (Fragment)	Rhipicephalus pulchellus PE	7	0	1	4
B7PAI2	Putative uncharacterized protein	Ixodes scapularis GN	4	0	1	3
G3MF36	Putative uncharacterized protein	Amblyomma maculatum PE	3	0	4	5
G3MGX4	Putative uncharacterized protein (Fragment)	Amblyomma maculatum PE	2	0	2	3
A0A023FL39	Putative dolichyl-diphosphooligosaccharide--protein glycosyltransferase subunit stt3a	Amblyomma cajennense PE	2	0	1	3
A0A023GLR5	Putative transcription factor (Fragment)	Amblyomma triste PE	2	0	1	3
L7MBV6	Putative kunitz-like peptide	Rhipicephalus pulchellus PE	2	0	1	3
B7P4S4	Putative uncharacterized protein	Ixodes scapularis GN	2	0	1	3
A0A023G7J3	Putative mitochondrial carrier protein (Fragment)	Amblyomma triste PE	2	0	2	5
V5HSL0	Putative regulation of transcription (Fragment)	Ixodes ricinus PE	1	0	2	3
L7M0D7	Innexin	Rhipicephalus pulchellus PE	1	0	1	3
B7QNC5	Putative uncharacterized protein	Ixodes scapularis GN	1	0	1	3
L7M4E0	Uncharacterized protein	Rhipicephalus pulchellus PE	0	0	1	7
L7M5G1	Uncharacterized protein	Rhipicephalus pulchellus PE	0	0	1	6
B7Q6L0	Trim56 protein, putative	Ixodes scapularis GN	0	0	2	4
B7QBZ2	Phosphoglucomutase, putative	Ixodes scapularis GN	0	0	1	4
B7QFH7	XAP-5, putative	Ixodes scapularis GN	0	0	1	4
G3MQE5	Putative uncharacterized protein	Amblyomma maculatum PE	0	0	1	4
A0A023FG21	V-type proton ATPase subunit a	Amblyomma cajennense PE	0	0	1	4
L7LVD2	Putative hdac6	Rhipicephalus pulchellus PE	0	0	2	3
L7LUC4	Uncharacterized protein	Rhipicephalus pulchellus PE	0	0	1	3
B7QK36	Putative uncharacterized protein	Ixodes scapularis GN	0	0	1	3
V5HXW7	Putative dna cytosine-5-methyltransferase 3a	Ixodes ricinus PE	0	0	1	3
B7QBD0	Polyprotein of retroviral origin, putative (Fragment)	Ixodes scapularis GN	0	0	1	3
G3MFR9	Putative uncharacterized protein (Fragment)	Amblyomma maculatum PE	0	0	1	3
A0A023GEN0	Putative 40s ribosomal protein s11	Amblyomma triste PE	0	0	1	3
A0A023G4U6	Putative trypsin (Fragment)	Amblyomma triste PE	0	0	1	3
L7MAF6	Uncharacterized protein	Rhipicephalus pulchellus PE	0	0	1	3
B7QK18	Innexin	Ixodes scapularis GN	0	0	1	3
A0A023GME7	Clathrin heavy chain	Amblyomma triste PE	10	21	0	4
G0WRZ9	Papilin (Fragment)	Rhipicephalus microplus GN	8	9	0	4
V5ICU1	Putative nucleolar	Ixodes ricinus PE	6	7	0	3
V5H760	Putative nuclear pore complex nup160 component (Fragment)	Ixodes ricinus PE	4	7	0	3
L7MMM1	Putative phagocytosis engulfment (Fragment)	Rhipicephalus pulchellus PE	0	12	0	3
A0A023GM49	Putative sarm protein with sterile alpha and armadillo motif (Fragment)	Amblyomma triste PE	3	7	0	3
A0A023G926	Uncharacterized protein (Fragment)	Amblyomma triste PE	0	6	0	4
L7M6K9	Putative splicing factor 3b subunit 1	Rhipicephalus pulchellus PE	0	6	0	3
V5HCG2	Putative yth domain-containing protein 1 (Fragment)	Ixodes ricinus PE	4	5	0	3
A0A023GME3	Putative vitellogenin-1 (Fragment)	Amblyomma triste PE	4	5	0	6
B7QHU0	Traf2 and nck interacting kinase, tnik, putative (Fragment)	Ixodes scapularis GN	4	5	0	3
V5II00	Putative tumor necrosis factor-mediated signaling pathway (Fragment)	Ixodes ricinus PE	1	7	0	4
B7P1I8	Neutral sphingomyelinase (N-smase) activation associated factor FAN, putative (Fragment)	Ixodes scapularis GN	0	5	0	5
L7LZM0	Uncharacterized protein	Rhipicephalus pulchellus PE	0	5	0	3
V5HK00	Putative splicing factor 3b subunit 1 (Fragment)	Ixodes ricinus PE	0	5	0	3
A0A023GCC6	Putative e3 ubiquitin-protein ligase huwe1	Amblyomma triste PE	0	5	0	3
A0A023GMC4	Putative microtubule-associated protein dynactin dctn1/glued	Amblyomma triste PE	0	5	0	3
L7MC39	Uncharacterized protein (Fragment)	Rhipicephalus pulchellus PE	8	6	0	3
L7MFY9	Putative ataxin-7 (Fragment)	Rhipicephalus pulchellus PE	6	4	0	5
B7Q0Q9	S1 RNA binding domain-containing protein, putative	Ixodes scapularis GN	6	4	0	4
B7Q4L7	ABC transporter, putative (Fragment)	Ixodes scapularis GN	6	4	0	3
A0A023GNV4	Putative heat shock protein	Amblyomma triste PE	5	6	0	3
A0A023FM84	Putative scaffold/matrix specific factor hnrnp-u/saf-a (Fragment)	Amblyomma cajennense PE	4	4	0	3
B7PHW3	Rapamycin-insensitive companion of mTOR, putative (Fragment)	Ixodes scapularis GN	3	5	0	3
L7MBL5	Putative amblyomma 40-33 family member	Rhipicephalus pulchellus PE	3	4	0	3
V5GZ57	Putative 8 1 7.9 kDa secreted protein	Ixodes ricinus PE	3	5	0	5
V5IFM7	Uncharacterized protein (Fragment)	Ixodes ricinus PE	4	5	0	3
A0A023GFW6	Uncharacterized protein (Fragment)	Amblyomma triste PE	3	5	0	3
A0A023FVK4	Putative dehydrogenase (Fragment)	Amblyomma parvum PE	2	4	0	3
L7MMQ6	Uncharacterized protein (Fragment)	Rhipicephalus pulchellus PE	1	4	0	3
B7QFP7	Sugar transporter, putative (Fragment)	Ixodes scapularis GN	1	4	0	3
A0A023G3N5	Putative salivary gland metalloprotease (Fragment)	Amblyomma triste PE	1	4	0	3
A0A023GNP5	Putative m13 family peptidase (Fragment)	Amblyomma triste PE	0	5	0	4
B7PDB3	Deubiquitinating protein VCIP135, putative (Fragment)	Ixodes scapularis GN	0	5	0	4
L7MFL2	Putative bilaris (Fragment)	Rhipicephalus pulchellus PE	0	5	0	4
L7LZB3	Uncharacterized protein	Rhipicephalus pulchellus PE	0	4	0	3
L7M7T6	Uncharacterized protein	Rhipicephalus pulchellus PE	0	4	0	3
B7P8W6	Protocadherin fat, putative	Ixodes scapularis GN	0	4	0	3
B7QCA7	Glucosidase II, putative (Fragment)	Ixodes scapularis GN	0	4	0	3
V5H866	Putative adaptor protein complex ap-1 (Fragment)	Ixodes ricinus PE	0	4	0	3
B7QB92	60 kD ribonucleoprotein ssa/ro, putative (Fragment)	Ixodes scapularis GN	5	3	0	3
V5IED3	Putative zinc ion binding protein (Fragment)	Ixodes ricinus PE	7	5	0	12
L7M4D3	Putative der and-287 heat shock-related protein	Rhipicephalus pulchellus PE	4	4	0	3
A0A023FZP9	Uncharacterized protein	Amblyomma parvum PE	3	4	0	3
L7M914	Putative ubiquitin-specific protease	Rhipicephalus pulchellus PE	4	3	0	3
B7PZD7	Sugar transporter, putative (Fragment)	Ixodes scapularis GN	2	4	0	6
B7Q8T7	Putative uncharacterized protein (Fragment)	Ixodes scapularis GN	2	3	0	3
B7QLF8	Putative uncharacterized protein (Fragment)	Ixodes scapularis GN	2	3	0	3
B7P2R4	Coup transcription factor, putative	Ixodes scapularis GN	2	4	0	3
L7M0I2	Putative molecular chaperone dnaj superfamily	Rhipicephalus pulchellus PE	1	3	0	3
B7PGQ1	DNA polymerase theta, putative (Fragment)	Ixodes scapularis GN	0	8	0	6
L7MAW7	Putative atp-dependent rna helicase (Fragment)	Rhipicephalus pulchellus PE	0	5	0	6
V9MMB8	NADH-ubiquinone oxidoreductase chain 2	Rhipicephalus annulatus GN	0	3	0	4
L7MAE6	Putative transcriptional repressor ctcf (Fragment)	Rhipicephalus pulchellus PE	0	3	0	4
L7LYP7	Uncharacterized protein	Rhipicephalus pulchellus PE	0	4	0	3
V5HLZ5	Putative rab-gtpase activating protein (Fragment)	Ixodes ricinus PE	0	4	0	3
B7P925	Histone H2A	Ixodes scapularis GN	0	3	0	3
B7P1V6	Putative uncharacterized protein	Ixodes scapularis GN	0	3	0	3
B7PW72	Galactosylgalactosylxylosylprotein 3-beta-glucuronosyltransferase, putative	Ixodes scapularis GN	0	3	0	3
B7QGE2	Hemelipoglycoprotein, putative	Ixodes scapularis GN	0	3	0	3
A0A023GM90	Putative dynamin-like 120 kDa protein mitochondrial	Amblyomma triste PE	0	3	0	3
A0A023GNW3	Putative cholesterol transport protein (Fragment)	Amblyomma triste PE	0	3	0	3
B7Q9K0	DEAD box ATP-dependent RNA helicase, putative (Fragment)	Ixodes scapularis GN	0	3	0	3
B7P225	G protein beta subunit, putative (Fragment)	Ixodes scapularis GN	0	3	0	3
B7QI43	Dehydrogenase, putative	Ixodes scapularis GN	0	3	0	3
V5HLI1	Putative tubulin-specific chaperone d (Fragment)	Ixodes ricinus PE	0	3	0	3
A0A023FJ16	Putative collagen alpha chain type iv ixodes scapularis collagen alpha chain type iv (Fragment)	Amblyomma cajennense PE	0	3	0	3
B7Q7V9	Sulfotransferase, putative	Ixodes scapularis GN	0	3	0	3
B7PLF5	Putative uncharacterized protein	Ixodes scapularis GN	4	3	0	3
A0A023G746	Uncharacterized protein	Amblyomma triste PE	4	2	0	3
B7PFM0	Tnf receptor associated factor, putative	Ixodes scapularis GN	2	3	0	3
B7QI02	WD-repeat protein, putative	Ixodes scapularis GN	2	3	0	3
V5HBA2	Putative rac1 gtpase effector frl (Fragment)	Ixodes ricinus PE	2	2	0	3
B7P1S0	Zinc finger protein, putative	Ixodes scapularis GN	2	2	0	3
B7PEI5	Putative uncharacterized protein (Fragment)	Ixodes scapularis GN	1	3	0	5
V5GM00	Putative cd73 ecto-5'-nucleotidase and related protein	Ixodes ricinus PE	0	6	0	5
L7LQL7	Putative tick salivary metalloprotease	Rhipicephalus pulchellus PE	0	3	0	4
V5IIF1	Putative salivary secreted peptide (Fragment)	Ixodes ricinus PE	0	3	0	4
L7MH59	Putative signal recognition particle receptor alpha subunit (Fragment)	Rhipicephalus pulchellus PE	0	2	0	4
L7M6T6	Uncharacterized protein	Rhipicephalus pulchellus PE	0	2	0	4
L7LQC1	Putative bitil peptide	Rhipicephalus pulchellus PE	0	2	0	4
L7MHY2	Uncharacterized protein (Fragment)	Rhipicephalus pulchellus PE	0	3	0	3
L7MG41	Uncharacterized protein (Fragment)	Rhipicephalus pulchellus PE	0	2	0	3
L7M069	Putative solute carrier family 17 sodium-dependent inorganic phosphate cotransporter member 8	Rhipicephalus pulchellus PE	0	2	0	3
L7LYP4	Putative tick transposon	Rhipicephalus pulchellus PE	0	2	0	3
L7MK12	alpha-1,2-Mannosidase (Fragment)	Rhipicephalus pulchellus PE	0	2	0	3
L7M0J9	Putative eukaryotic translation initiation factor 4e nuclear import factor 1	Rhipicephalus pulchellus PE	0	2	0	3
B7P7L0	Ethanolamine kinase, putative	Ixodes scapularis GN	0	2	0	3
B7P0P2	DNA mismatch repair protein, putative	Ixodes scapularis GN	0	2	0	3
G3MRL2	Putative uncharacterized protein	Amblyomma maculatum PE	0	2	0	3
V5I444	Putative atp-dependent rna helicase (Fragment)	Ixodes ricinus PE	0	2	0	3
V5HKH8	Putative prdm9 protein	Ixodes ricinus PE	0	2	0	3
A0A023FLK7	Putative rna splicing factor	Amblyomma cajennense PE	0	2	0	3
A0A023GBN7	Putative prohibitin-related membrane protease subunit	Amblyomma triste PE	0	2	0	3
G3MLQ3	Putative uncharacterized protein	Amblyomma maculatum PE	0	2	0	3
F0J9P7	C1-tetrahydrofolate synthase (Fragment)	Amblyomma variegatum PE	0	2	0	3
L7M3V5	Putative doublesex and mab-3 related transcription factor 1	Rhipicephalus pulchellus PE	3	1	0	3
B7Q237	RNA-directed RNA polymerase, putative (Fragment)	Ixodes scapularis GN	3	1	0	3
A0A023G6Z5	Putative gypsy nogag	Amblyomma triste PE	6	2	0	3
L7MEH2	Putative dunce (Fragment)	Rhipicephalus pulchellus PE	2	1	0	3
B7PJ96	Putative uncharacterized protein	Ixodes scapularis GN	2	1	0	3
V5HAL0	Putative ring finger protein 10 (Fragment)	Ixodes ricinus PE	2	1	0	3
G3MMM7	Putative uncharacterized protein	Amblyomma maculatum PE	2	1	0	3
B7PCZ5	Glutathione synthetase, putative (Fragment)	Ixodes scapularis GN	1	1	0	3
Q6B8F9	Putative salivary secreted peptide	Ixodes pacificus PE	1	1	0	3
L7LY08	Putative der and-72 secreted protein	Rhipicephalus pulchellus PE	1	1	0	3
V5GMS7	Putative peptidase family m13	Ixodes ricinus PE	0	1	0	5
G3MRK6	Putative uncharacterized protein	Amblyomma maculatum PE	0	1	0	5
V5HDD2	Putative serine/threonine-protein kinase pelle	Ixodes ricinus PE	0	1	0	5
L7LZ58	Uncharacterized protein	Rhipicephalus pulchellus PE	0	1	0	4
B7PJU9	Polynucleotide kinase 3' phosphatase, putative	Ixodes scapularis GN	0	1	0	4
A0A023FBZ6	Putative secreted protein	Amblyomma cajennense PE	0	1	0	4
B7P1N4	Cytochrome P450, putative	Ixodes scapularis GN	0	2	0	3
G3MJI9	Putative uncharacterized protein (Fragment)	Amblyomma maculatum PE	0	1	0	3
V5HVQ4	Putative zinc finger protein (Fragment)	Ixodes ricinus PE	0	1	0	3
A0A023GMB7	Uncharacterized protein (Fragment)	Amblyomma triste PE	0	1	0	3
A0A023G784	Putative peroxinectin ixodes scapularis peroxinectin (Fragment)	Amblyomma triste PE	0	1	0	3
B7PWE9	Sulfotransferase, putative	Ixodes scapularis GN	0	1	0	3
B7QCM8	Putative uncharacterized protein	Ixodes scapularis GN	0	1	0	3
A0A023FMH0	Putative ubx domain-containing protein 6	Amblyomma cajennense PE	0	1	0	3
B7QKD7	Pheromone and odorant receptor, putative (Fragment)	Ixodes scapularis GN	7	0	0	4
A0A023GNL8	Putative aicar transformylase/imp cyclohydrolase/methylglyoxal synthase (Fragment)	Amblyomma triste PE	7	0	0	3
V5HHE0	Uncharacterized protein (Fragment)	Ixodes ricinus PE	6	0	0	4
L7LY01	Uncharacterized protein	Rhipicephalus pulchellus PE	5	0	0	4
B7PRZ2	Serine/threonine protein kinase, putative (Fragment)	Ixodes scapularis GN	6	0	0	3
A0A023GNL5	Putative golgi apparatus protein cysteine-rich fibroblast growth factor receptor (Fragment)	Amblyomma triste PE	4	0	0	3
A0A023FQ83	Putative serum amyloid a	Amblyomma cajennense PE	3	0	0	5
L7LYJ5	Putative rhipicephalus family xiv	Rhipicephalus pulchellus PE	4	0	0	4
B7QE54	Programmed cell death protein, putative	Ixodes scapularis GN	3	0	0	3
A0A023GNU7	Putative synaptic vesicle transporter svop	Amblyomma triste PE	3	0	0	3
L7M302	Putative four and a half lim protein 2	Rhipicephalus pulchellus PE	3	0	0	3
B7QJZ0	Arylsulfatase B, putative	Ixodes scapularis GN	4	0	0	4
V5HBT8	Putative c-3 sterol dehydrogenase/3-beta-hydroxysteroid dehydrogenase	Ixodes ricinus PE	3	0	0	4
B7PZX8	Putative uncharacterized protein	Ixodes scapularis GN	2	0	0	4
A0A023FEJ6	Putative polyglutamylase ixodes scapularis polyglutamylase (Fragment)	Amblyomma cajennense PE	2	0	0	4
B7PA64	RAB GTPase-activating protein, putative	Ixodes scapularis GN	2	0	0	4
B7P7P5	Diacylglycerol kinase, putative (Fragment)	Ixodes scapularis GN	3	0	0	3
B7PN45	Laminin alpha-1, 2 chain, putative	Ixodes scapularis GN	3	0	0	3
L7MKK3	Putative adamts-9 a disintegrin and metalloprotein (Fragment)	Rhipicephalus pulchellus PE	2	0	0	3
L7M201	Putative glucosidase ii catalytic alpha subunit	Rhipicephalus pulchellus PE	2	0	0	3
B7Q2M4	Putative uncharacterized protein	Ixodes scapularis GN	2	0	0	3
B7QJH6	Alpha-actinin, putative	Ixodes scapularis GN	2	0	0	3
V5GLI9	Putative vesicle coat complex ap-3 delta subunit	Ixodes ricinus PE	2	0	0	3
A0A023FZX1	Putative sulfotransferase (Fragment)	Amblyomma parvum PE	2	0	0	3
A0A023FM87	Putative translation elongation factor	Amblyomma cajennense PE	2	0	0	3
A0A023G7P3	Putative focal adhesion protein tensin (Fragment)	Amblyomma triste PE	2	0	0	3
L7M7J2	Uncharacterized protein	Rhipicephalus pulchellus PE	2	0	0	3
V5HS17	Putative cut up (Fragment)	Ixodes ricinus PE	2	0	0	3
B7PPU6	Maternal embryonic leucine zipper kinase, putative	Ixodes scapularis GN	9	0	0	8
B7P3K2	Cyclic-AMP-dependent transcription factor atf-6, putative (Fragment)	Ixodes scapularis GN	1	0	0	7
V5I5M4	Putative galactoside-binding lectin (Fragment)	Ixodes ricinus PE	2	0	0	4
V5HPE6	Uncharacterized protein (Fragment)	Ixodes ricinus PE	1	0	0	4
M9MTD9	Serine/threonine kinase	Haemaphysalis longicornis PE	2	0	0	3
V5HTN7	Putative phospholipase a2-activating protein (Fragment)	Ixodes ricinus PE	2	0	0	3
L7M2S6	Putative non-muscle myosin family member nmy-1 caenorhabditis elegans protein nmy-1	Rhipicephalus pulchellus PE	1	0	0	3
L7LYE0	Putative catalytic domain-containing protein	Rhipicephalus pulchellus PE	1	0	0	3
A0A023FZ20	Putative secreted protein 94	Amblyomma parvum PE	1	0	0	3
A0A023GMF8	Putative rvt 1 (Fragment)	Amblyomma triste PE	1	0	0	3
A0A023GC84	Putative vesicle coat complex copii subunit sec23 (Fragment)	Amblyomma triste PE	1	0	0	3
L7MKB3	Putative tick transposon (Fragment)	Rhipicephalus pulchellus PE	1	0	0	3
E1CAY0	Vitellogenin-3	Haemaphysalis longicornis GN	1	0	0	3
A0A023FE92	Putative ribosomal protein l24	Amblyomma cajennense PE	1	0	0	3
V5I0L5	Putative translationally-controlled tumor (Fragment)	Ixodes ricinus PE	0	0	0	9
A0A023G1U1	Putative lipocalin-7 1	Amblyomma triste PE	0	0	0	7
L7M2T9	Putative sorting nexin	Rhipicephalus pulchellus PE	0	0	0	6
L7M8W4	Putative metastriate ixostatin family member	Rhipicephalus pulchellus PE	0	0	0	5
F0J8U7	Polyprotein (Fragment)	Amblyomma variegatum PE	0	0	0	5
V5HA62	Putative tumor necrosis factor receptor (Fragment)	Ixodes ricinus PE	0	0	0	5
A0A023G2R6	Putative secreted protein	Amblyomma parvum PE	0	0	0	5
B7PZM8	Rhogtpase, putative	Ixodes scapularis GN	0	0	0	4
B7Q412	Putative uncharacterized protein	Ixodes scapularis GN	0	0	0	4
B7P8M8	Putative uncharacterized protein	Ixodes scapularis GN	0	0	0	4
G3MPS1	Putative uncharacterized protein	Amblyomma maculatum PE	0	0	0	4
G3MRT2	Putative uncharacterized protein	Amblyomma maculatum PE	0	0	0	4
V5HQF4	Putative tick metalloprotease (Fragment)	Ixodes ricinus PE	0	0	0	4
V5HVX0	Uncharacterized protein	Ixodes ricinus PE	0	0	0	4
V5HVH4	Putative lipocalin-2 1	Ixodes ricinus PE	0	0	0	4
V5GEZ4	Putative lactosylceramide 4-alpha-galactosyltransferase-like protein	Ixodes ricinus PE	0	0	0	4
V5HEM2	Putative salivary secreted peptide (Fragment)	Ixodes ricinus PE	0	0	0	4
A0A023GE77	Uncharacterized protein	Amblyomma triste PE	0	0	0	4
A0A023GJN9	Putative dna-directed rna polymerase i subunit rpa49 (Fragment)	Amblyomma triste PE	0	0	0	4
G3MNF3	Putative uncharacterized protein	Amblyomma maculatum PE	0	0	0	3
Q6PRC8	Putative uncharacterized protein	Ornithodoros moubata PE	0	0	0	3
L7MF65	Putative monolaris (Fragment)	Rhipicephalus pulchellus PE	0	0	0	3
L7M7Y1	Triosephosphate isomerase	Rhipicephalus pulchellus PE	0	0	0	3
L7MLK0	Uncharacterized protein (Fragment)	Rhipicephalus pulchellus PE	0	0	0	3
L7M7I7	Putative alkyl hydroperoxide reductase thiol specific antioxidant	Rhipicephalus pulchellus PE	0	0	0	3
L7LYB1	Uncharacterized protein	Rhipicephalus pulchellus PE	0	0	0	3
L7M2N6	Putative obg family gtpase cgta	Rhipicephalus pulchellus PE	0	0	0	3
L7M7C5	Putative alcohol dehydrogenase class iv	Rhipicephalus pulchellus PE	0	0	0	3
L7M7W2	Fructose-bisphosphate aldolase	Rhipicephalus pulchellus PE	0	0	0	3
L7MGN8	Putative survival motor neuron protein (Fragment)	Rhipicephalus pulchellus PE	0	0	0	3
L7M1C9	Putative endocytosis protein rme-8	Rhipicephalus pulchellus PE	0	0	0	3
L7MH31	Putative zinc finger protein (Fragment)	Rhipicephalus pulchellus PE	0	0	0	3
L7LT95	Uncharacterized protein	Rhipicephalus pulchellus PE	0	0	0	3
A6N9Y8	40S ribosomal protein S11	Ornithodoros parkeri PE	0	0	0	3
B7P814	Putative uncharacterized protein	Ixodes scapularis GN	0	0	0	3
B7P1Y5	Putative uncharacterized protein	Ixodes scapularis GN	0	0	0	3
B7PYT3	Putative uncharacterized protein	Ixodes scapularis GN	0	0	0	3
B7Q818	39S ribosomal protein L28, putative (Fragment)	Ixodes scapularis GN	0	0	0	3
B7Q1Z8	Neuronal cell adhesion molecule, putative	Ixodes scapularis GN	0	0	0	3
B7PV21	Synaptotagmin-14, putative	Ixodes scapularis GN	0	0	0	3
B7P9T1	Zinc finger protein, putative (Fragment)	Ixodes scapularis GN	0	0	0	3
B7P3P9	Putative uncharacterized protein	Ixodes scapularis GN	0	0	0	3
B7P9G9	Putative uncharacterized protein (Fragment)	Ixodes scapularis GN	0	0	0	3
B7QKD3	Huntingtin interacting protein, putative	Ixodes scapularis GN	0	0	0	3
B7P1J6	GTPase Rho, putative	Ixodes scapularis GN	0	0	0	3
B7QE83	Putative uncharacterized protein (Fragment)	Ixodes scapularis GN	0	0	0	3
B7QCH0	ABC transporter, putative	Ixodes scapularis GN	0	0	0	3
B7P4L9	Putative uncharacterized protein	Ixodes scapularis GN	0	0	0	3
B7PHB6	Calponin, putative	Ixodes scapularis GN	0	0	0	3
B7Q2L5	Putative uncharacterized protein (Fragment)	Ixodes scapularis GN	0	0	0	3
B7PP64	Putative uncharacterized protein	Ixodes scapularis GN	0	0	0	3
B7P5F7	Putative uncharacterized protein	Ixodes scapularis GN	0	0	0	3
Q4PMC7	Eukaryotic translation initiation factor 3 subunit F	Ixodes scapularis PE	0	0	0	3
B7Q878	Alpha/beta hydrolase domain-containing protein, putative (Fragment)	Ixodes scapularis GN	0	0	0	3
B7Q9C8	Dehydrogenase, putative (Fragment)	Ixodes scapularis GN	0	0	0	3
B7QKT2	Putative uncharacterized protein (Fragment)	Ixodes scapularis GN	0	0	0	3
B7P2G6	Zinc finger protein, putative (Fragment)	Ixodes scapularis GN	0	0	0	3
B7P737	Putative uncharacterized protein	Ixodes scapularis GN	0	0	0	3
G3MGN4	Putative uncharacterized protein (Fragment)	Amblyomma maculatum PE	0	0	0	3
G3MIY3	Putative uncharacterized protein (Fragment)	Amblyomma maculatum PE	0	0	0	3
V5HJ77	Putative cytochrome p450 cyp3/cyp5/cyp6/cyp9 subfamily (Fragment)	Ixodes ricinus PE	0	0	0	3
V5HSK8	Putative mitochondrial solute carrier protein	Ixodes ricinus PE	0	0	0	3
V5IFP1	Putative heat shock 70 kDa protein 14	Ixodes ricinus PE	0	0	0	3
V5HVV2	Putative secreted protein	Ixodes ricinus PE	0	0	0	3
V5HHE9	Uncharacterized protein (Fragment)	Ixodes ricinus PE	0	0	0	3
V5IHL0	Putative signal peptide cub domain protein (Fragment)	Ixodes ricinus PE	0	0	0	3
V5GRW2	Putative prune protein 2	Ixodes ricinus PE	0	0	0	3
V5HHA2	Uncharacterized protein (Fragment)	Ixodes ricinus PE	0	0	0	3
V5GX56	Putative secreted protein	Ixodes ricinus PE	0	0	0	3
V5H1Q5	Putative secreted protein	Ixodes ricinus PE	0	0	0	3
V5GEF5	Putative dolichyl-diphosphooligosaccharide--protein glycosyltransferase subunit 1 (Fragment)	Ixodes ricinus PE	0	0	0	3
V5HJ35	Uncharacterized protein	Ixodes ricinus PE	0	0	0	3
A0A023FZJ7	Putative cell death abnormality protein 1 (Fragment)	Amblyomma parvum PE	0	0	0	3
A0A023FIS3	Putative snare protein gs28 (Fragment)	Amblyomma cajennense PE	0	0	0	3
A0A023FK83	Putative translation initiation factor 2 gamma subunit	Amblyomma cajennense PE	0	0	0	3
A0A023FJG5	Uncharacterized protein (Fragment)	Amblyomma cajennense PE	0	0	0	3
A0A023FF47	Uncharacterized protein	Amblyomma cajennense PE	0	0	0	3
A0A023GNP2	Putative nucleolar protein fibrillarin nop77 rrm superfamily (Fragment)	Amblyomma triste PE	0	0	0	3
A0A023GFE9	Putative presequence protease (Fragment)	Amblyomma triste PE	0	0	0	3
A0A023G7S2	Putative lipocalin-3 1 (Fragment)	Amblyomma triste PE	0	0	0	3
A0A023GN32	Putative deoxyribonuclease ii	Amblyomma triste PE	0	0	0	3
V5HPS2	Putative nad+ adp-ribosyltransferase-3-like protein (Fragment)	Ixodes ricinus PE	7	10	12	2
L7LZ16	Putative spatacsin	Rhipicephalus pulchellus PE	6	6	10	2
L7M897	Putative mitochondrial inner membrane protein mitofilin	Rhipicephalus pulchellus PE	4	6	8	2
L7LY97	Putative zinc finger protein	Rhipicephalus pulchellus PE	0	6	9	3
L7M4Q4	60S ribosomal protein L18a	Rhipicephalus pulchellus PE	0	0	8	2
L7MDX3	Putative inhibitor of type v adenylyl cyclase/neuronal presynaptic protein highwire/pam/rpm-1 (Fragment)	Rhipicephalus pulchellus PE	8	14	15	6
L7M1F6	Putative transcriptional coactivator	Rhipicephalus pulchellus PE	3	9	15	5
G3MKI7	Putative uncharacterized protein	Amblyomma maculatum PE	1	3	7	2
L7MK23	Putative tricarboxylate transport protein mitochondrial (Fragment)	Rhipicephalus pulchellus PE	8	7	6	2
L7M5P4	Putative prohibitin-like protein	Rhipicephalus pulchellus PE	3	8	7	3
L7LSB9	Uncharacterized protein	Rhipicephalus pulchellus PE	2	7	6	2
L7MC14	Putative dna mismatch repair protein (Fragment)	Rhipicephalus pulchellus PE	15	18	14	11
L7M7Z9	Putative cytochrome c1	Rhipicephalus pulchellus PE	3	7	7	2
L7M679	Putative f0f1-type atp synthase gamma subunit	Rhipicephalus pulchellus PE	7	5	6	2
L7LUY7	Uncharacterized protein	Rhipicephalus pulchellus PE	0	4	7	2
A0A023FUV2	Putative vitellogenin-2	Amblyomma cajennense PE	5	3	7	2
A0A023GMD0	Putative camp-regulated guanine nucleotide exchange factor (Fragment)	Amblyomma triste PE	3	5	6	2
B7PJA9	Killer toxin-resistance protein, putative	Ixodes scapularis GN	4	2	6	2
V5HE89	Uncharacterized protein (Fragment)	Ixodes ricinus PE	5	1	6	2
A0A023GP73	Putative beta-spectrin (Fragment)	Amblyomma triste PE	7	6	5	2
A0A023FWV6	Dolichyl-diphosphooligosaccharide--protein glycosyltransferase subunit 1	Amblyomma parvum PE	4	7	7	4
A0A023FF22	Putative erythrocyte membrane-associated antigen (Fragment)	Amblyomma cajennense PE	0	7	6	2
L7LZ38	Putative histone acetyltransferase saga/ada catalytic subunit pcaf/gcn5	Rhipicephalus pulchellus PE	6	4	5	2
V5I4T6	Putative serine/arginine repetitive matrix 2	Ixodes ricinus PE	4	4	5	3
L7M3L9	Uncharacterized protein (Fragment)	Rhipicephalus pulchellus PE	3	8	8	3
B7PKP1	Ribosome biogenesis protein bms1, putative	Ixodes scapularis GN	3	5	6	2
A0A023GP58	Putative myosin class ii heavy chain (Fragment)	Amblyomma triste PE	0	4	5	2
B7PVG3	Protein phosphatase 2A regulatory subunit A, putative (Fragment)	Ixodes scapularis GN	5	3	5	3
B7PRX7	Putative uncharacterized protein (Fragment)	Ixodes scapularis GN	4	4	7	3
V5HN77	Uncharacterized protein (Fragment)	Ixodes ricinus PE	2	3	6	2
L7MEX9	Putative conserved secreted protein (Fragment)	Rhipicephalus pulchellus PE	0	3	6	2
L7M832	Elongation factor Tu	Rhipicephalus pulchellus PE	1	2	5	2
L7M2G3	Putative electron transfer flavoprotein ubiquinone oxidoreductase	Rhipicephalus pulchellus PE	0	2	5	2
V5HZC6	Putative translation initiation factor 5b eif-5b (Fragment)	Ixodes ricinus PE	0	2	5	2
L7LTN5	Putative tick transposon	Rhipicephalus pulchellus PE	1	2	7	4
A0A023FM20	Putative translation elongation factor ef-1 alpha/tu	Amblyomma cajennense PE	4	0	6	2
L7M6S2	Putative e3 ubiquitin ligase	Rhipicephalus pulchellus PE	2	0	6	6
B7PRT0	Putative uncharacterized protein (Fragment)	Ixodes scapularis GN	2	0	5	2
B7QL31	Serpin-1, putative	Ixodes scapularis GN	0	0	5	3
V5IE71	Putative positive regulation of transcription (Fragment)	Ixodes ricinus PE	0	0	6	2
A0A023FJ95	Ribosomal protein L15	Amblyomma cajennense PE	0	0	5	2
B1B544	Vitellogenin-2	Haemaphysalis longicornis GN	6	9	5	2
L7LXN2	Putative short stop	Rhipicephalus pulchellus PE	5	9	6	2
L7M324	Putative chaperonin chaperonin	Rhipicephalus pulchellus PE	2	7	5	3
L7M1Y1	Putative mrna processing protein	Rhipicephalus pulchellus PE	9	6	5	3
A0A023GBX7	Putative moesin/ezrin/radixin protein 1	Amblyomma triste PE	3	5	4	2
B7Q5C3	Phosphatase/kinase domain-containing protein, putative	Ixodes scapularis GN	0	6	6	2
B7QNP8	Cysteine-rich motor neuron, putative	Ixodes scapularis GN	0	6	5	2
A0A034WU44	Acetylcholinesterase 1 (Fragment)	Rhipicephalus microplus PE	6	6	10	6
L7M7D5	Putative bre1	Rhipicephalus pulchellus PE	5	4	7	5
L7M032	Putative nlr family card domain protein	Rhipicephalus pulchellus PE	4	4	4	2
B7Q5Y2	Prohibitin, putative	Ixodes scapularis GN	3	4	4	2
L7LVK3	Putative glycine rich protein	Rhipicephalus pulchellus PE	2	4	4	2
V5GVR9	Uncharacterized protein (Fragment)	Ixodes ricinus PE	1	4	4	2
B7P0T8	Putative uncharacterized protein	Ixodes scapularis GN	0	5	4	2
B7PVU5	Dihydroxyacetone kinase, putative (Fragment)	Ixodes scapularis GN	6	5	4	2
A9Y1V1	Ribosomal protein P0	Haemaphysalis longicornis PE	3	3	5	2
B7P530	Putative uncharacterized protein	Ixodes scapularis GN	2	3	4	2
Q5ER89	Intestinal protein Bm86-like (Fragment)	Rhipicephalus microplus PE	1	3	4	5
A0A023FPK7	Putative b-cell receptor-associated protein	Amblyomma cajennense PE	1	3	5	3
L7M3C0	Putative nadh:ubiquinone oxidoreductase ndufa10/42kda subunit	Rhipicephalus pulchellus PE	1	3	4	2
B7QL07	Putative uncharacterized protein	Ixodes scapularis GN	0	3	5	2
B7PUK7	Phosphoenolpyruvate carboxylase, putative (Fragment)	Ixodes scapularis GN	0	4	4	2
L7M402	Putative transcription initiation factor tfiid subunit 3	Rhipicephalus pulchellus PE	0	3	4	2
V5GMB2	Putative transport protein sec61 alpha subunit	Ixodes ricinus PE	5	2	4	3
V5HAC4	Putative nuclear pore complex nup155 component d nup154 sc (Fragment)	Ixodes ricinus PE	5	3	11	2
A0A023FV58	Cytochrome b-c1 complex subunit Rieske, mitochondrial	Amblyomma parvum PE	2	3	5	3
A0A023FV83	Putative transcription elongation factor tfiis/cofactor of enhancer-binding protein sp1 (Fragment)	Amblyomma parvum PE	2	2	4	3
V5HLE7	Putative cysteinyl-trna synthetase	Ixodes ricinus PE	2	2	5	2
L7MBE5	Putative tick serine protease	Rhipicephalus pulchellus PE	2	2	4	2
L7ME11	Putative gamma-soluble nsf attachment protein (Fragment)	Rhipicephalus pulchellus PE	2	2	4	2
B7P9Z0	Putative uncharacterized protein	Ixodes scapularis GN	1	2	4	2
L7M3K2	60S ribosomal protein L13	Rhipicephalus pulchellus PE	0	2	5	2
V5I1Y8	Putative udp-n-acetylglucosamine pyrophosphorylase	Ixodes ricinus PE	0	2	5	2
B7P9B1	Putative uncharacterized protein	Ixodes scapularis GN	0	2	4	2
L7MFJ2	Putative translation initiation factor 2b delta subunit eif-2bdelta/gcd2 (Fragment)	Rhipicephalus pulchellus PE	5	2	5	2
L7M1C0	Uncharacterized protein	Rhipicephalus pulchellus PE	1	1	4	2
L7MFV2	Putative fucosyltransferase (Fragment)	Rhipicephalus pulchellus PE	0	2	5	4
B2D2B2	Ribosomal protein S16	Ornithodoros coriaceus PE	0	2	5	2
L7M0F3	Putative mrna splicing factor atp-dependent rna helicase	Rhipicephalus pulchellus PE	4	0	5	2
V5IBA5	Putative tetratricopeptide repeat protein 37	Ixodes ricinus PE	2	0	6	2
V5HH13	Putative conserved oligomeric golgi complex subunit 6 (Fragment)	Ixodes ricinus PE	1	0	7	2
B7PY48	Apical endosomal glycoprotein, putative (Fragment)	Ixodes scapularis GN	1	0	4	2
A0A023GC90	Putative cold shock domain protein	Amblyomma triste PE	1	0	4	2
V5H407	Putative e3 ubiquitin ligase	Ixodes ricinus PE	1	0	4	2
A0A023GLX5	Putative carnitine o-acyltransferase cpt2/yat1	Amblyomma triste PE	0	0	5	5
V5GX70	Putative phosphorylase b kinase regulatory subunit alpha isoform 1 protein	Ixodes ricinus PE	0	0	7	2
A0A023FRR2	Putative 60s ribosomal protein l23 (Fragment)	Amblyomma cajennense PE	0	0	5	2
L7M1E8	Putative copper-transporting atp	Rhipicephalus pulchellus PE	0	0	4	2
A0A023FM68	Uncharacterized protein	Amblyomma cajennense PE	0	0	4	2
B7QHP9	MAP7 domain-containing protein, putative	Ixodes scapularis GN	0	0	4	2
A0A023FZQ3	Putative beta tubulin	Amblyomma parvum PE	8	9	4	2
A0A023FMD9	Putative beta tubulin	Amblyomma cajennense PE	4	8	5	2
L7M6H5	Putative heat shock-related protein	Rhipicephalus pulchellus PE	8	8	4	2
L7MGU2	Uncharacterized protein (Fragment)	Rhipicephalus pulchellus PE	0	10	4	2
B7PN18	ABC transporter, putative	Ixodes scapularis GN	0	7	3	2
B7PUR5	Ubiquitin specific proteinase, putative (Fragment)	Ixodes scapularis GN	0	6	3	2
B7PNN8	Zinc finger protein, putative	Ixodes scapularis GN	0	6	3	2
B7Q4R8	General transcription factor IIE (TFIIE) subunit, putative	Ixodes scapularis GN	8	7	3	3
A0A023G500	Putative nidogen (Fragment)	Amblyomma triste PE	7	7	6	3
L7MDM0	Reticulon-like protein (Fragment)	Rhipicephalus pulchellus PE	6	6	3	3
L7MMV9	Uncharacterized protein (Fragment)	Rhipicephalus pulchellus PE	4	5	3	2
B7QP23	Paramyosin, putative	Ixodes scapularis GN	5	5	5	6
L7MHX5	Putative structural maintenance (Fragment)	Rhipicephalus pulchellus PE	3	9	5	5
A0A023GNV6	Putative serine/threonine protein kinase (Fragment)	Amblyomma triste PE	3	5	4	2
L7MAE8	Putative mannose lectin ergic-53 involved in glycoprotein traffic	Rhipicephalus pulchellus PE	3	5	3	2
A0A034WZ83	Secreted protein 28 (Fragment)	Rhipicephalus microplus PE	2	6	4	2
L7M2U5	Putative cytochrome b5	Rhipicephalus pulchellus PE	3	6	3	2
E5D589	Ir86-1 protein	Ixodes ricinus PE	1	6	4	2
B7QNI9	NADH:ubiquinone oxidoreductase, NDUFA9/39kDa subunit, putative	Ixodes scapularis GN	0	7	3	3
L7M983	Putative glycine rich protein	Rhipicephalus pulchellus PE	8	6	4	2
L7LV00	Uncharacterized protein	Rhipicephalus pulchellus PE	3	5	4	3
A0A023FPQ7	Putative calnexin	Amblyomma cajennense PE	3	6	3	2
Q5ER81	Intestinal protein Bm86-like (Fragment)	Rhipicephalus microplus PE	2	5	3	5
V5IDQ3	Putative tripeptidyl-peptidase 2	Ixodes ricinus PE	2	4	3	4
V5H7R9	Putative abc transporter c family member	Ixodes ricinus PE	3	6	4	2
B7PE87	Putative uncharacterized protein	Ixodes scapularis GN	1	5	3	2
B7PGQ2	Calnexin, putative	Ixodes scapularis GN	1	4	3	2
A0A023GFX0	Putative nuclear export receptor cse1/cas importin beta superfamily	Amblyomma triste PE	0	5	3	2
V5I200	Putative nad synthase	Ixodes ricinus PE	0	4	3	2
V5H2W0	Putative rb retinoblastoma tumor suppressor-related protein	Ixodes ricinus PE	6	5	4	2
Q64K77	Calreticulin	Ixodes pararicinus PE	4	3	3	3
L7MDM7	Putative peroxisomal long-chain acyl-coa transporter abc superfamily (Fragment)	Rhipicephalus pulchellus PE	4	3	4	2
A0A023FGX2	Putative mitochondrial intermembrane space protein transporter complex	Amblyomma cajennense PE	6	6	7	7
L7MIW8	Putative pap-associated domain-containing protein 5 (Fragment)	Rhipicephalus pulchellus PE	3	4	4	5
L7MFQ1	Putative ubiquitin ligase e3 (Fragment)	Rhipicephalus pulchellus PE	5	7	8	4
L7LY18	Putative tick transposon	Rhipicephalus pulchellus PE	4	4	4	2
B7PJP2	Putative uncharacterized protein	Ixodes scapularis GN	4	4	3	2
B7SP51	Putative mitochondrial processing peptidase beta-subunit (Fragment)	Dermacentor variabilis PE	4	4	3	2
V5GS92	Uncharacterized protein	Ixodes ricinus PE	3	4	3	2
L7M3H4	Putative sulfate/bicarbonate/oxalate exchanger sat-1	Rhipicephalus pulchellus PE	3	3	3	2
L7M442	Uncharacterized protein	Rhipicephalus pulchellus PE	3	6	6	5
A0A023FE64	Putative signal peptidase complex subunit (Fragment)	Amblyomma cajennense PE	2	3	3	2
G3MIY0	Putative uncharacterized protein (Fragment)	Amblyomma maculatum PE	1	3	4	2
L7MKC6	Putative transcription elongation factor a sii 1 (Fragment)	Rhipicephalus pulchellus PE	1	4	3	2
B7PD57	Integrin beta-3, putative (Fragment)	Ixodes scapularis GN	1	3	3	2
Q4PM33	Cytochrome c oxidase polypeptide Vb	Ixodes scapularis PE	1	3	3	2
L7LZ34	Putative tick transposon	Rhipicephalus pulchellus PE	0	3	5	4
A0A023G8G8	Uncharacterized protein	Amblyomma triste PE	0	3	3	3
V5HPZ4	Putative regulator of nonsense transcripts 3b	Ixodes ricinus PE	0	4	5	2
A0A023GD48	Putative mitochondrial inner membrane protein mitofilin	Amblyomma triste PE	0	5	3	2
L7MFG3	Ubiquitin carboxyl-terminal hydrolase (Fragment)	Rhipicephalus pulchellus PE	0	4	3	2
B7PTD5	Lethal(3)malignant brain tumor, putative	Ixodes scapularis GN	0	4	3	2
L7M693	Putative adiponutrin	Rhipicephalus pulchellus PE	0	4	3	2
L7LXE8	Putative membrane glycoprotein lig-1	Rhipicephalus pulchellus PE	0	4	3	2
L7LVC2	Uncharacterized protein	Rhipicephalus pulchellus PE	0	3	3	2
A0A023GKL6	Putative sulfotransferase ixodes scapularis sulfotransferase	Amblyomma triste PE	0	3	3	2
L7MJ13	Protein argonaute (Fragment)	Rhipicephalus pulchellus PE	5	2	3	2
A0A023GHU3	Putative f0f1-type atp synthase gamma subunit	Amblyomma triste PE	5	2	3	2
B7Q8P4	Putative uncharacterized protein	Ixodes scapularis GN	4	2	3	2
V5HUY9	Putative qless (Fragment)	Ixodes ricinus PE	3	2	4	2
B7PY16	ABC transporter, putative	Ixodes scapularis GN	3	2	3	2
V5HI00	Putative serine/threonine protein kinase (Fragment)	Ixodes ricinus PE	2	2	5	2
F0J933	Ribophorin II (Fragment)	Amblyomma variegatum PE	2	3	4	2
B7PLI3	Putative uncharacterized protein	Ixodes scapularis GN	2	2	4	2
F0J8S7	Hemomucin (Fragment)	Amblyomma variegatum PE	3	3	3	2
V5IH20	Putative nuclear pore complex protein nup54 (Fragment)	Ixodes ricinus PE	2	2	3	2
Q5ER75	Intestinal protein Bm86-like (Fragment)	Rhipicephalus microplus PE	1	2	3	5
V5HHW1	Uncharacterized protein	Ixodes ricinus PE	0	2	4	2
G3MH59	Putative uncharacterized protein (Fragment)	Amblyomma maculatum PE	0	2	3	2
V5H7L9	Putative mitochondrial enolase superfamily member 1 (Fragment)	Ixodes ricinus PE	0	2	3	2
V5I1X1	Putative 2-oxoglutarate dehydrogenase e1 subunit (Fragment)	Ixodes ricinus PE	0	2	3	2
B7Q8B5	Ng,ng-dimethylarginine dimethylaminohydrolase, putative (Fragment)	Ixodes scapularis GN	0	2	3	2
V5IK07	Putative serine/arginine-rich splicing factor 2a	Ixodes ricinus PE	0	2	3	2
L7MKP4	Putative intracellular membrane-bound ca2+-independent phospholipase a2 (Fragment)	Rhipicephalus pulchellus PE	11	1	3	7
B7PKY7	ABC transporter, putative (Fragment)	Ixodes scapularis GN	5	1	3	3
A0A023FWM9	Putative ribosome bioproteinsis protein (Fragment)	Amblyomma parvum PE	2	1	3	3
A0A023GJJ6	Putative phd finger protein 10	Amblyomma triste PE	2	1	4	2
B7PSM3	Putative uncharacterized protein	Ixodes scapularis GN	2	1	3	2
B7PM41	Heparanase, putative (Fragment)	Ixodes scapularis GN	1	2	3	3
A0A023FZH7	Putative acyl-coa synthetase (Fragment)	Amblyomma parvum PE	2	2	3	2
B7P4F5	Sumo ligase, putative	Ixodes scapularis GN	1	1	3	2
A0A023FZW1	Putative evasin 1	Amblyomma parvum PE	1	1	3	2
G3MT63	Putative uncharacterized protein	Amblyomma maculatum PE	0	3	6	11
L7MCE6	Putative carboxypeptidase inhibitor	Rhipicephalus pulchellus PE	0	1	4	4
A0A023FVP0	Putative 60s ribosomal protein l2/l8 (Fragment)	Amblyomma parvum PE	0	1	3	2
B7QL44	Armadillo repeat-containing protein, putative	Ixodes scapularis GN	0	1	3	2
A0A023FKF5	Putative dihydropyrimidine dehydrogenase (Fragment)	Amblyomma cajennense PE	0	1	3	2
L7MHW9	Putative transferrin 2 (Fragment)	Rhipicephalus pulchellus PE	8	0	3	2
L7MIZ1	Putative syntaxin-binding protein 2 (Fragment)	Rhipicephalus pulchellus PE	6	0	6	3
B7QIL1	FERM, RhoGEF and pleckstrin domain-containing protein, putative (Fragment)	Ixodes scapularis GN	3	0	4	3
L7MGG9	Putative long-chain acyl-coa synthetase amp-forming (Fragment)	Rhipicephalus pulchellus PE	3	0	3	3
G3MLJ3	Putative uncharacterized protein	Amblyomma maculatum PE	4	0	3	2
A0A023GBR0	Putative cyclin-dependent kinase cdk5	Amblyomma triste PE	3	0	3	2
A0A023GJ90	Putative o-sialoglycoprotein endopeptidase danio rerio osgep protein (Fragment)	Amblyomma triste PE	2	0	4	3
L7M8Q1	Putative cop9 signalosome subunit csn2	Rhipicephalus pulchellus PE	3	0	4	2
V5HSE9	Uncharacterized protein (Fragment)	Ixodes ricinus PE	2	0	4	2
L7MK73	Putative serine/threonine-protein kinase d3 (Fragment)	Rhipicephalus pulchellus PE	2	0	3	2
B7PGV4	Putative uncharacterized protein	Ixodes scapularis GN	2	0	3	2
A0A023G616	Putative neural cell adhesion molecule l1	Amblyomma triste PE	2	0	3	2
A0A023GC31	Putative intracellular membrane-bound ca2+-independent phospholipase a2	Amblyomma triste PE	1	0	4	2
V5HJW5	Putative ankyrin (Fragment)	Ixodes ricinus PE	1	0	4	2
B7P4E1	Glutamate dehydrogenase	Ixodes scapularis GN	1	0	3	2
V5GZ29	Putative transcriptional coactivator	Ixodes ricinus PE	1	0	3	2
L7MCV1	Putative conserved secreted protein (Fragment)	Rhipicephalus pulchellus PE	0	0	4	4
B7PSX1	Tumor suppressor p130, putative	Ixodes scapularis GN	0	0	3	4
A0A023GB59	Putative center divider (Fragment)	Amblyomma triste PE	0	0	3	4
A0A023FJ82	Uncharacterized protein (Fragment)	Amblyomma cajennense PE	0	0	4	3
B7QCA2	Zinc finger protein, putative	Ixodes scapularis GN	0	0	3	3
B7Q1G1	Methylmalonyl coenzyme A mutase, putative	Ixodes scapularis GN	0	0	3	3
A0A023GLV7	Putative nucleolar complex protein 2	Amblyomma triste PE	0	0	3	3
E2J6Y3	60S ribosomal protein L14 (Fragment)	Hyalomma marginatum rufipes PE	0	0	5	2
L7LYY3	Uncharacterized protein	Rhipicephalus pulchellus PE	0	0	4	2
B7P8V7	Palmitoyltransferase	Ixodes scapularis GN	0	0	4	2
A0A023GEW3	Putative 60s ribosomal protein	Amblyomma triste PE	0	0	4	2
L7MHY1	Putative osa (Fragment)	Rhipicephalus pulchellus PE	0	0	3	2
L7MDP0	Putative transcription initiation factor tfiid subunit taf1 (Fragment)	Rhipicephalus pulchellus PE	0	0	3	2
B7PUV0	Putative uncharacterized protein	Ixodes scapularis GN	0	0	3	2
E2J6V7	40S ribosomal protein S2/30S (Fragment)	Hyalomma marginatum rufipes PE	0	0	3	2
A0A023FID1	Putative succinyl-coa synthetase alpha subunit	Amblyomma cajennense PE	0	0	3	2
A0A023GCH1	Putative hsc70-interacting protein	Amblyomma triste PE	0	0	3	2
A0A023G759	Putative proteasome activator subunit (Fragment)	Amblyomma triste PE	0	0	3	2
L7MK00	Putative tick serine protease (Fragment)	Rhipicephalus pulchellus PE	0	0	3	2
L7M8S0	Putative secreted peptide	Rhipicephalus pulchellus PE	0	0	3	2
B7PB76	Arylsulfatase B, putative (Fragment)	Ixodes scapularis GN	0	0	3	2
A0A023GNY1	Uncharacterized protein	Amblyomma triste PE	0	0	3	2
B7PM89	Putative uncharacterized protein	Ixodes scapularis GN	0	0	3	2
A0A023FFA4	40S ribosomal protein S24	Amblyomma cajennense PE	0	0	3	2
A0A034WXY9	Heat shock protein 70 cognate (Fragment)	Rhipicephalus microplus PE	4	10	2	2
B7P4S3	Prolyl 4-hydroxylase alpha subunit, putative (Fragment)	Ixodes scapularis GN	3	7	2	2
V5HSU0	Putative rho-associated coiled-coil (Fragment)	Ixodes ricinus PE	2	6	2	2
A0A023GCW4	Putative mrna processing protein (Fragment)	Amblyomma triste PE	0	6	2	3
V5HDG6	Putative delta l-pyrroline-5-carboxylate synthetase	Ixodes ricinus PE	4	5	2	2
L7MG26	Putative kinesin-like protein (Fragment)	Rhipicephalus pulchellus PE	2	5	2	2
A0A023GJ14	Putative adenine deaminase/adenosine deaminase	Amblyomma triste PE	2	5	2	2
A0A023GFY9	Putative beta-lactamase	Amblyomma triste PE	1	5	2	2
A0A023FX24	Putative acetyl-coa acetyltransferase	Amblyomma parvum PE	0	5	2	4
L7MCP5	Putative crooked legs (Fragment)	Rhipicephalus pulchellus PE	0	6	3	3
A0A023FIJ3	Uncharacterized protein	Amblyomma cajennense PE	0	5	2	2
V5HDF9	Putative endocytic adaptor protein intersectin (Fragment)	Ixodes ricinus PE	6	4	2	7
L7M1L4	Putative cactin	Rhipicephalus pulchellus PE	7	6	2	2
L7LZU5	Uncharacterized protein	Rhipicephalus pulchellus PE	4	4	2	2
B7PWS8	Secreted protein, putative	Ixodes scapularis GN	2	7	3	4
L7M8C6	Putative tyrosyl-trna synthetase cytoplasmic	Rhipicephalus pulchellus PE	2	5	3	3
G3MMU5	Putative uncharacterized protein	Amblyomma maculatum PE	4	4	3	2
A0A023GKK7	Putative camp-regulated guanine nucleotide exchange factor (Fragment)	Amblyomma triste PE	3	6	2	2
B7Q1I7	NADPH:adrenodoxin oxidoreductase, putative	Ixodes scapularis GN	2	6	2	2
V5HFI5	Putative methyltransferase small domain protein (Fragment)	Ixodes ricinus PE	0	4	5	5
B7PAU5	Prominin protein, putative	Ixodes scapularis GN	0	4	4	3
B7PR69	Neprilysin, putative (Fragment)	Ixodes scapularis GN	0	5	4	2
B7P0R6	Putative uncharacterized protein (Fragment)	Ixodes scapularis GN	0	6	2	2
L7MM28	Putative damage-specific dna binding complex subunit ddb1 (Fragment)	Rhipicephalus pulchellus PE	0	4	2	2
A0A023FLG8	Putative short-chain acyl-coa dehydrogenase	Amblyomma cajennense PE	0	4	2	2
V5II82	Putative mucin-5ac (Fragment)	Ixodes ricinus PE	5	4	2	2
V5I1T7	Putative prolyl 4-hydroxylase subunit alpha-1 (Fragment)	Ixodes ricinus PE	4	4	7	6
L7MAN9	Uncharacterized protein	Rhipicephalus pulchellus PE	5	3	2	2
B7P202	Putative uncharacterized protein	Ixodes scapularis GN	5	7	2	3
C9W1S9	Cytochrome c oxidase polypeptide IV (Fragment)	Rhipicephalus sanguineus PE	4	5	5	2
V5H7N4	Putative lim-type zinc finger-containing protein (Fragment)	Ixodes ricinus PE	4	3	4	2
B7P8N3	Peroxisomal biogenesis factor, putative	Ixodes scapularis GN	3	6	5	5
V5II13	Putative spatzle 5 (Fragment)	Ixodes ricinus PE	7	9	3	5
L7MJF8	Uncharacterized protein (Fragment)	Rhipicephalus pulchellus PE	9	4	3	5
B7P5V9	Leucine-rich transmembrane protein, putative	Ixodes scapularis GN	4	3	2	4
A0A023FW81	Putative glycosyltransferase (Fragment)	Amblyomma parvum PE	2	3	5	2
B7Q5X4	Putative uncharacterized protein	Ixodes scapularis GN	2	3	3	2
G3MMS8	Putative uncharacterized protein	Amblyomma maculatum PE	5	4	2	2
A0A023GBR7	Putative rna-binding protein	Amblyomma triste PE	3	4	2	2
B7Q0X9	DNA methyltransferase 1-associated protein-1, putative (Fragment)	Ixodes scapularis GN	2	3	2	2
A0A023G8F7	Putative secreted protein (Fragment)	Amblyomma triste PE	2	3	2	2
G3MMH0	Triosephosphate isomerase	Amblyomma maculatum PE	2	5	2	4
B7PJK8	Programmed cell death-involved protein, putative	Ixodes scapularis GN	2	5	3	3
B7QD63	Nuclear pore complex protein Nup88, putative	Ixodes scapularis GN	1	5	3	3
B5M739	Chaperonin containing TCP1 subunit 6A isoform a (Fragment)	Amblyomma americanum PE	2	3	3	2
A0A023GC64	Putative sister chromatid cohesion complex cohesin subunit pds5 (Fragment)	Amblyomma triste PE	2	4	2	2
G3MI41	Putative uncharacterized protein (Fragment)	Amblyomma maculatum PE	2	3	2	2
L7LZR8	Uncharacterized protein	Rhipicephalus pulchellus PE	1	3	2	2
G3MPU2	Putative uncharacterized protein	Amblyomma maculatum PE	1	3	2	2
V5IBW2	Putative retinoic acid induced 12	Ixodes ricinus PE	1	3	2	2
B7QMH9	Putative uncharacterized protein	Ixodes scapularis GN	0	3	4	3
V5HIC0	Putative tick metalloprotease (Fragment)	Ixodes ricinus PE	0	4	2	3
B7QI69	Sprouty protein evh1 domain-containing protein, putative (Fragment)	Ixodes scapularis GN	0	3	2	3
L7MCD7	Putative graves disease carrier protein (Fragment)	Rhipicephalus pulchellus PE	0	3	4	2
B7PYR4	Woc protein, putative	Ixodes scapularis GN	0	3	3	2
L7M553	Putative reproduction	Rhipicephalus pulchellus PE	0	3	2	2
V5IK13	Putative cactin (Fragment)	Ixodes ricinus PE	0	3	2	2
B7Q1Z5	Putative uncharacterized protein	Ixodes scapularis GN	0	3	2	2
L7MD18	Putative tick transposon (Fragment)	Rhipicephalus pulchellus PE	3	2	3	2
L7M2B2	Translocon-associated protein subunit beta	Rhipicephalus pulchellus PE	3	2	2	2
L7M5Z9	Putative hormone-like 96 protein	Rhipicephalus pulchellus PE	2	2	4	3
A0A023GHM1	Putative lipid particle	Amblyomma triste PE	2	4	3	3
A0A023FUU9	Putative tick metalloprotease 1	Amblyomma cajennense PE	3	3	3	2
L7M5U8	Putative f-box protein 31	Rhipicephalus pulchellus PE	3	2	3	2
A0A023G5L7	Phosphoglycerate kinase	Amblyomma triste PE	2	2	3	2
L7LY79	Putative caspase apoptotic cysteine protease	Rhipicephalus pulchellus PE	2	3	2	2
G3MSI6	Putative uncharacterized protein	Amblyomma maculatum PE	2	2	2	2
A0A023GKN7	Uncharacterized protein	Amblyomma triste PE	10	13	5	10
A0A023FY87	Putative receptor-like serine/threonine kinase	Amblyomma parvum PE	1	5	4	4
G3MGG3	Putative uncharacterized protein (Fragment)	Amblyomma maculatum PE	7	2	4	4
A0A023FPB1	Putative cytochrome p450 cyp3/cyp5/cyp6/cyp9 subfamily (Fragment)	Amblyomma cajennense PE	1	2	2	4
L7M7K5	Putative leucine zipper transcription factor-like 1 strongylocentrotus purpuratus	Rhipicephalus pulchellus PE	2	4	2	3
B7SP49	Putative glycosyl hydrolase (Fragment)	Dermacentor variabilis PE	1	4	3	2
A0A023FGK2	Putative thioredoxin peroxidase	Amblyomma cajennense PE	1	2	3	2
L7M5H2	Uncharacterized protein	Rhipicephalus pulchellus PE	1	2	3	2
A0A023FKU5	Putative peroxisomal phytanoyl-coa hydroxylase (Fragment)	Amblyomma cajennense PE	2	4	2	2
B7PE70	Putative uncharacterized protein	Ixodes scapularis GN	1	2	2	2
L7MHV1	Putative tick salivary metalloprotease (Fragment)	Rhipicephalus pulchellus PE	0	2	4	5
V5HFW6	Putative g-protein coupled receptor orphan (Fragment)	Ixodes ricinus PE	0	2	2	3
L7MEU6	Putative ubiquitin carboxyl-terminal hydrolase 10 (Fragment)	Rhipicephalus pulchellus PE	0	3	3	2
V5HIE2	1,2-dihydroxy-3-keto-5-methylthiopentene dioxygenase	Ixodes ricinus PE	0	3	2	2
A0A023G386	Putative secreted protein	Amblyomma triste PE	0	3	2	2
B7PHS2	Putative uncharacterized protein	Ixodes scapularis GN	0	2	2	2
V5HYY5	Uncharacterized protein (Fragment)	Ixodes ricinus PE	0	2	2	2
L7LYD8	Putative angiotensin i-converting enzyme	Rhipicephalus pulchellus PE	0	2	2	2
B7PM74	Secreted protein, putative (Fragment)	Ixodes scapularis GN	0	2	2	2
B7PV95	Putative uncharacterized protein	Ixodes scapularis GN	0	2	2	2
L7MAC7	Oxysterol-binding protein	Rhipicephalus pulchellus PE	5	3	5	4
L7M5L5	Putative receptor ccr1	Rhipicephalus pulchellus PE	3	1	2	4
G3MJF6	Putative uncharacterized protein (Fragment)	Amblyomma maculatum PE	3	2	3	3
A0A023G0D6	Putative ubiquitin-like modifier activating enzyme 1	Amblyomma parvum PE	3	2	2	2
B7Q363	Translocon-associated protein, gamma subunit, putative	Ixodes scapularis GN	3	2	2	2
L7MGU3	Putative nlr family card domain protein (Fragment)	Rhipicephalus pulchellus PE	3	1	2	2
L7LWD3	Putative rna helicase	Rhipicephalus pulchellus PE	2	2	3	4
B7PZV1	Putative uncharacterized protein	Ixodes scapularis GN	2	2	2	3
V5HFU0	Putative p-type atpase (Fragment)	Ixodes ricinus PE	2	1	6	2
B7PWM0	Serine/threonine protein phosphatase 2A regulatory subunit B'' subunit gamma, putative	Ixodes scapularis GN	2	2	4	2
V5HUT6	Proteasome subunit alpha type	Ixodes ricinus PE	5	3	3	2
A0A023G785	Putative peptidase family m13 includes neprilysin	Amblyomma triste PE	2	1	2	2
A0A023FJV8	Putative adaptor protein pacsin	Amblyomma cajennense PE	4	9	12	9
B7PCJ0	Putative uncharacterized protein	Ixodes scapularis GN	4	2	5	7
A0A023G1Q2	Putative tick metalloprotease 39 (Fragment)	Amblyomma parvum PE	1	1	3	3
V5IDV2	Putative akap7 2'5' rna ligase-like domain protein (Fragment)	Ixodes ricinus PE	1	2	2	3
A0A023G3K9	Putative lipocalin-7 7	Amblyomma triste PE	3	5	4	2
B7QI33	cAMP-specific cyclic nucleotide phosphodiesterase, putative	Ixodes scapularis GN	2	3	4	2
V5HIU2	Putative trypsin-like serine protease	Ixodes ricinus PE	1	1	3	2
A0A023FX80	Putative conserved protein with signal anchor (Fragment)	Amblyomma parvum PE	1	2	2	2
A0A023GEH5	Putative e3 ubiquitin-protein ligase (Fragment)	Amblyomma triste PE	1	1	2	2
B1GTW6	Metis4 protein	Ixodes ricinus GN	1	1	2	2
B7PYQ4	Beta-ketoacyl-ACP reductase, putative	Ixodes scapularis GN	0	1	5	4
V5I268	Putative kv channel-interacting protein (Fragment)	Ixodes ricinus PE	0	2	2	3
A0A023GHC4	Pyrroline-5-carboxylate reductase	Amblyomma triste PE	0	2	4	2
L7LYJ8	Uncharacterized protein	Rhipicephalus pulchellus PE	0	1	4	2
V5IK44	Malate dehydrogenase	Ixodes ricinus PE	0	2	3	2
B7PXM3	Putative uncharacterized protein	Ixodes scapularis GN	0	1	3	2
L7M430	Tetraspanin	Rhipicephalus pulchellus PE	0	1	3	2
B7QNN3	Low-density lipoprotein receptor, putative (Fragment)	Ixodes scapularis GN	0	1	2	2
V5HT90	Putative clathrin coat dissociation kinase gak/pten/auxilin (Fragment)	Ixodes ricinus PE	0	1	2	2
V5HUT9	Putative regulator of rac1 required for phagocytosis and cell migration	Ixodes ricinus PE	0	1	2	2
L7LU78	Putative the sema domain protein (Fragment)	Rhipicephalus pulchellus PE	0	1	2	2
B7Q8X8	Putative uncharacterized protein	Ixodes scapularis GN	0	1	2	2
B7PK42	Putative uncharacterized protein	Ixodes scapularis GN	0	1	2	2
V5H954	Putative threonine aldolase (Fragment)	Ixodes ricinus PE	0	1	2	2
B7QHS3	Putative uncharacterized protein	Ixodes scapularis GN	0	1	2	2
B7Q9S2	Putative uncharacterized protein	Ixodes scapularis GN	0	1	2	2
G3MRG1	Putative uncharacterized protein	Amblyomma maculatum PE	0	1	2	2
G3MPH8	Putative uncharacterized protein	Amblyomma maculatum PE	0	1	2	2
V5HZ27	Putative ras-related protein rab-5b	Ixodes ricinus PE	0	1	2	2
V5GZA7	Putative zinc finger protein 84 (Fragment)	Ixodes ricinus PE	0	1	2	2
V5GN36	Putative secreted protein (Fragment)	Ixodes ricinus PE	0	1	2	2
A0A023FWP7	Peptidyl-prolyl cis-trans isomerase (Fragment)	Amblyomma parvum PE	0	1	2	2
V5HKB8	Putative yata (Fragment)	Ixodes ricinus PE	0	1	2	2
L7MEX1	Putative o-linked n-acetylglucosamine transferase ogt (Fragment)	Rhipicephalus pulchellus PE	5	0	2	3
L7MHY8	Putative peroxisome proliferator-activated receptor binding protein (Fragment)	Rhipicephalus pulchellus PE	4	0	2	2
L7LU46	Uncharacterized protein	Rhipicephalus pulchellus PE	4	0	3	5
L7MIK6	Uncharacterized protein (Fragment)	Rhipicephalus pulchellus PE	3	0	4	3
L7M6I5	Uncharacterized protein	Rhipicephalus pulchellus PE	3	0	2	2
B7PC83	Anoctamin (Fragment)	Ixodes scapularis GN	3	0	2	2
B7P8J1	Putative uncharacterized protein	Ixodes scapularis GN	4	0	4	5
L7ME84	Putative nucleoside diphosphate-sugar hydrolase of the mutt nudix family (Fragment)	Rhipicephalus pulchellus PE	2	0	4	4
A6N9R8	40S ribosomal protein S10	Ornithodoros parkeri PE	2	0	4	3
A0A023G5R0	Putative secreted protein	Amblyomma triste PE	2	0	3	2
B7PB12	Adenomatous polyposis coli protein, putative	Ixodes scapularis GN	3	0	2	2
L7M2A4	Putative alpha actinin	Rhipicephalus pulchellus PE	2	0	2	2
V5H213	Putative tick metalloprotease	Ixodes ricinus PE	2	0	2	2
L7MMN1	Putative metalloendopeptidase family (Fragment)	Rhipicephalus pulchellus PE	2	0	2	2
B7PMI6	Putative uncharacterized protein	Ixodes scapularis GN	2	0	2	2
V5H7Q4	Putative krotzkopf verkehrt (Fragment)	Ixodes ricinus PE	2	0	2	2
V5HE50	Putative tnf receptor-associated factor 4 (Fragment)	Ixodes ricinus PE	1	0	3	3
A0A023FKC3	Uncharacterized protein (Fragment)	Amblyomma cajennense PE	1	0	3	3
L7MFE2	Putative syntaxin-binding protein 2 (Fragment)	Rhipicephalus pulchellus PE	1	0	2	3
A0A023FH14	Putative mediator of rna polymerase ii transcription subunit 14	Amblyomma cajennense PE	1	0	3	2
A0A023FPJ9	Uncharacterized protein	Amblyomma cajennense PE	1	0	3	2
V5I150	Putative 60s ribosomal protein l5 (Fragment)	Ixodes ricinus PE	1	0	2	2
L7MMJ0	Putative tick transposon (Fragment)	Rhipicephalus pulchellus PE	1	0	2	2
A0A023FII2	Putative galactokinase (Fragment)	Amblyomma cajennense PE	0	0	2	5
L7M9Q3	Putative igf/kazal/ig domain-containing protein	Rhipicephalus pulchellus PE	0	0	3	4
V5HL58	Putative regulation of transcription (Fragment)	Ixodes ricinus PE	0	0	2	4
L7M1Z6	Uncharacterized protein	Rhipicephalus pulchellus PE	0	0	3	3
B7PG79	Putative uncharacterized protein (Fragment)	Ixodes scapularis GN	0	0	3	3
U3PTH6	Cystatin 2d (Fragment)	Rhipicephalus microplus GN	0	0	2	3
E3VRC2	Acetylcholinesterase 2	Rhipicephalus microplus GN	0	0	2	3
V5H876	Putative 4-aminobutyrate aminotransferase	Ixodes ricinus PE	0	0	2	3
L7LXN5	Uncharacterized protein	Rhipicephalus pulchellus PE	0	0	2	3
V5I0S4	Putative tissue factor pathway inhibitor 2	Ixodes ricinus PE	0	0	2	3
V5HX53	Putative mediator of dna damage checkpoint 1 (Fragment)	Ixodes ricinus PE	0	0	2	3
A0A023GHZ8	Putative ribosomal protein s7	Amblyomma triste PE	0	0	2	3
Q6B8B8	Shwachman-Bodian-Diamond syndrome-like protein	Ixodes pacificus PE	0	0	4	2
B7P7J3	Zinc finger protein, putative	Ixodes scapularis GN	0	0	3	2
A0A023FV11	Putative inositol monophosphatase	Amblyomma parvum PE	0	0	3	2
L7MFK8	Putative ixodegrin (Fragment)	Rhipicephalus pulchellus PE	0	0	2	2
L7M8P5	Uncharacterized protein	Rhipicephalus pulchellus PE	0	0	2	2
L7LX29	Putative dna replication helicase	Rhipicephalus pulchellus PE	0	0	2	2
L7LXU2	Putative microtubule associated complex	Rhipicephalus pulchellus PE	0	0	2	2
B7QKD5	Putative uncharacterized protein	Ixodes scapularis GN	0	0	2	2
B7Q0L9	Conserved oligomeric golgi complex subunit, putative	Ixodes scapularis GN	0	0	2	2
B7QHG0	Putative uncharacterized protein	Ixodes scapularis GN	0	0	2	2
B7Q9L2	Nucleolar protein c7c, putative (Fragment)	Ixodes scapularis GN	0	0	2	2
G3MNL4	Putative uncharacterized protein	Amblyomma maculatum PE	0	0	2	2
G3MQN1	Putative uncharacterized protein	Amblyomma maculatum PE	0	0	2	2
V5HG78	Putative cytochrome	Ixodes ricinus PE	0	0	2	2
V5GZL8	Putative vesicle coat complex copi gamma subunit (Fragment)	Ixodes ricinus PE	0	0	2	2
V5IIS6	Putative zinc finger protein 2	Ixodes ricinus PE	0	0	2	2
V5GUQ2	Putative fanconi anemia complementation group d2 (Fragment)	Ixodes ricinus PE	0	0	2	2
V5HWH9	Uncharacterized protein	Ixodes ricinus PE	0	0	2	2
A0A023GAJ4	Putative secreted protein (Fragment)	Amblyomma triste PE	0	0	2	2
A0A023GPE9	Putative asparaginase	Amblyomma triste PE	0	0	2	2
L7LSK0	Uncharacterized protein	Rhipicephalus pulchellus PE	0	0	2	2
L7M2F0	Putative p63	Rhipicephalus pulchellus PE	0	0	2	2
L7LW92	Putative cilium assembly	Rhipicephalus pulchellus PE	0	0	2	2
Q9GP10	Uncharacterized protein	Ixodes ricinus PE	0	0	2	2
B7PEH1	Putative uncharacterized protein	Ixodes scapularis GN	0	0	2	2
B7PYH4	Putative uncharacterized protein	Ixodes scapularis GN	0	0	2	2
B7QDB8	Putative uncharacterized protein	Ixodes scapularis GN	0	0	2	2
B7P835	Zinc-binding dehydrogenase, putative (Fragment)	Ixodes scapularis GN	0	0	2	2
V5HYQ4	Putative connector enhancer of ksr (Fragment)	Ixodes ricinus PE	0	0	2	2
V5HVI1	Putative zinc ion binding protein (Fragment)	Ixodes ricinus PE	0	0	2	2
V5HDV4	Putative phd and ring finger domain-containing protein 1 (Fragment)	Ixodes ricinus PE	0	0	2	2
V5GMJ4	Uncharacterized protein	Ixodes ricinus PE	0	0	2	2
V5HPW6	Putative atp-dependent rna helicase (Fragment)	Ixodes ricinus PE	0	0	2	2
V5I367	Uncharacterized protein	Ixodes ricinus PE	0	0	2	2
A0A023FXU8	Putative 39s ribosomal protein	Amblyomma parvum PE	0	0	2	2
A0A023GD31	Putative tick kunitz 1	Amblyomma triste PE	0	0	2	2
B7Q7A0	Amyloid beta A4 protein (APP)-binding protein, putative (Fragment)	Ixodes scapularis GN	3	6	3	4
G3MFY4	Putative uncharacterized protein (Fragment)	Amblyomma maculatum PE	5	6	3	7
L7MLS6	Putative g protein-coupled receptor kinase 5 (Fragment)	Rhipicephalus pulchellus PE	1	5	2	2
B7PHG7	Putative uncharacterized protein	Ixodes scapularis GN	0	6	1	3
L7LPL8	Putative bilaris	Rhipicephalus pulchellus PE	0	5	1	2
B7P7A5	Dolichyl-diphosphooligosaccharide--protein glycosyltransferase subunit 1 (Fragment)	Ixodes scapularis GN	3	5	2	3
L7MDN9	Putative c2h2-type zn-finger protein (Fragment)	Rhipicephalus pulchellus PE	3	4	1	2
A0A023GLX1	Putative ring finger protein 10 (Fragment)	Amblyomma triste PE	2	4	1	2
L7MAV7	Uncharacterized protein (Fragment)	Rhipicephalus pulchellus PE	1	5	2	2
L7MA59	Putative translocase of outer mitochondrial membrane complex subunit	Rhipicephalus pulchellus PE	1	4	2	2
L7ME93	Putative ankyrin (Fragment)	Rhipicephalus pulchellus PE	0	5	1	2
V5GUD1	Uncharacterized protein (Fragment)	Ixodes ricinus PE	4	4	1	3
L7MDV5	Putative activin receptor type-2b (Fragment)	Rhipicephalus pulchellus PE	3	3	2	2
A6N9T0	Cytochrome c oxidase polyprotein Vb	Ornithodoros parkeri PE	3	4	3	4
G3MPB7	Putative uncharacterized protein	Amblyomma maculatum PE	2	4	3	2
L7LTX3	Putative carboxypeptidase inhibitor	Rhipicephalus pulchellus PE	1	5	2	2
V5H9P0	Putative multiple inositol polyphosphate phosphatase 1-like protein (Fragment)	Ixodes ricinus PE	1	6	1	2
A0A023FY19	Putative aconitase/aconitase aconitase superfamily (Fragment)	Amblyomma parvum PE	2	4	1	2
V5HLS0	Putative nuclear protein cop1 (Fragment)	Ixodes ricinus PE	0	3	2	5
A0A023GCM0	Putative protoporphyrinogen oxidase (Fragment)	Amblyomma triste PE	0	3	2	4
V5HDI9	Putative ring finger protein (Fragment)	Ixodes ricinus PE	0	6	1	3
G3MJF1	Putative uncharacterized protein (Fragment)	Amblyomma maculatum PE	0	3	1	3
V5H686	Putative atp synthase subunit s mitochondrial	Ixodes ricinus PE	0	6	1	2
A0A023GG21	Putative atp-dependent rna helicase	Amblyomma triste PE	0	4	1	2
L7MEP5	Putative tyrosine sulfotransferase culex quinquefasciatus tyrosine sulfotransferase (Fragment)	Rhipicephalus pulchellus PE	0	4	1	2
B7P4F0	Secreted protein, putative	Ixodes scapularis GN	6	4	2	4
A0A023GGV5	Putative creatine kinase	Amblyomma triste PE	6	2	2	3
B7P6I9	Acyl-CoA synthetase, putative (Fragment)	Ixodes scapularis GN	5	3	1	3
V5GQ87	Putative secreted protein	Ixodes ricinus PE	10	7	3	11
G3MI95	Putative uncharacterized protein (Fragment)	Amblyomma maculatum PE	7	4	2	5
V5IJN9	Putative cation binding protein (Fragment)	Ixodes ricinus PE	3	2	3	3
B7QM34	RING finger motif containing protein (Fragment)	Ixodes scapularis GN	3	3	1	2
A0A023FTZ8	Putative salivary gland-associated protein	Amblyomma cajennense PE	2	3	2	4
V5HAF9	Putative secreted protein	Ixodes ricinus PE	3	4	2	3
L7M6B0	Palmitoyltransferase	Rhipicephalus pulchellus PE	2	3	1	3
E7E820	Cathepsin D2	Ixodes ricinus PE	3	2	1	3
L7MJX3	Putative this conserved domain family includes a large number (Fragment)	Rhipicephalus pulchellus PE	2	4	3	2
A0A023FH31	Uncharacterized protein	Amblyomma cajennense PE	2	5	1	2
V5HBV7	Putative heat shock protein 10	Ixodes ricinus PE	3	2	1	2
Q8MVF4	Putative secreted protein	Ixodes scapularis PE	2	4	2	3
A0A023GPB8	alpha-1,2-Mannosidase	Amblyomma triste PE	2	3	2	3
A0A023FGD0	Ribosomal protein L37	Amblyomma cajennense PE	2	2	2	3
B7P248	Cell adhesion molecule, putative	Ixodes scapularis GN	1	2	1	3
B7PZ45	Monocarboxylate transporter, putative (Fragment)	Ixodes scapularis GN	1	3	1	2
V9MM93	NADH-ubiquinone oxidoreductase chain 6	Dermacentor nitens GN	2	2	1	2
L7MLE3	Putative lipophorin receptor (Fragment)	Rhipicephalus pulchellus PE	1	2	1	2
G3MJB9	Putative uncharacterized protein (Fragment)	Amblyomma maculatum PE	0	3	1	5
Q5ER88	Intestinal protein Bm86-like (Fragment)	Rhipicephalus microplus PE	0	2	1	5
B7PEK4	F-box/leucine rich repeat protein, putative	Ixodes scapularis GN	0	5	3	3
A0A023GGH1	Putative tick serpins 33 (Fragment)	Amblyomma triste PE	0	2	2	3
V5HJH3	CTP synthase	Ixodes ricinus PE	0	2	1	3
G3MFN6	Putative uncharacterized protein (Fragment)	Amblyomma maculatum PE	0	3	2	2
B7Q5U7	Putative uncharacterized protein	Ixodes scapularis GN	0	3	1	2
A0A023G1Z1	Putative atf family transcription factor creb-h (Fragment)	Amblyomma parvum PE	0	3	1	2
A0A023GCX2	Putative inositol-145-triphosphate 5-phosphatase synaptojanin inp51/inp52/inp53 family	Amblyomma triste PE	0	3	1	2
B7QM38	Putative uncharacterized protein	Ixodes scapularis GN	0	2	1	2
B7PBW3	Protein disulfide isomerase 1, putative	Ixodes scapularis GN	0	2	1	2
B7PHP2	Putative uncharacterized protein	Ixodes scapularis GN	0	2	1	2
E2J6S6	Cytochrome c oxidase subunit Va	Hyalomma marginatum rufipes PE	0	2	1	2
V5IIU6	Putative glucose transporter (Fragment)	Ixodes ricinus PE	0	2	1	2
V5HKK4	Uncharacterized protein (Fragment)	Ixodes ricinus PE	0	2	1	2
A0A023GC71	Putative rho gtpase-activating protein (Fragment)	Amblyomma triste PE	0	2	1	2
B7P8F5	Putative uncharacterized protein	Ixodes scapularis GN	3	1	1	2
A0A023GCZ9	Putative evasin 1	Amblyomma triste PE	3	1	3	7
L7MJN4	Putative septins p-loop gtpase (Fragment)	Rhipicephalus pulchellus PE	2	3	7	4
B7PJM4	Putative uncharacterized protein	Ixodes scapularis GN	3	2	3	3
L7M796	Putative aldehyde dehydrogenase	Rhipicephalus pulchellus PE	3	1	2	3
V5HZD6	Putative tnf receptor-associated factor 6	Ixodes ricinus PE	2	2	2	2
A0A023FTC8	Histone H2A	Amblyomma parvum PE	2	1	2	2
B7PCN2	Molecular chaperone, putative	Ixodes scapularis GN	2	1	2	2
V5I0Q6	Uncharacterized protein	Ixodes ricinus PE	2	2	1	2
L7MBS9	Uncharacterized protein (Fragment)	Rhipicephalus pulchellus PE	2	1	1	2
A0A023FX50	Putative emp24/gp25l/p24 family of membrane trafficking (Fragment)	Amblyomma parvum PE	2	1	1	2
B0AZW2	Putative secreted salivary protein	Ixodes ricinus GN	2	1	1	2
B7PGF1	Dystrobrevin, putative	Ixodes scapularis GN	2	1	1	2
B7QNL6	alpha-1,2-Mannosidase	Ixodes scapularis GN	2	1	1	2
G3MN66	Putative uncharacterized protein	Amblyomma maculatum PE	7	20	39	34
B7Q6F5	Secreted protein, putative	Ixodes scapularis GN	7	7	3	5
B7P6J6	Secreted protein, putative (Fragment)	Ixodes scapularis GN	4	3	6	4
L7M2E9	Putative rna 3'-terminal phosphate cyclase	Rhipicephalus pulchellus PE	1	1	3	3
A0A023GG20	Putative udp-glucose:glycoprotein glucosyltransferase	Amblyomma triste PE	1	1	3	3
A0A023GJS9	Putative ankyrin repeat protein (Fragment)	Amblyomma triste PE	2	2	2	2
L7M8C3	Uncharacterized protein	Rhipicephalus pulchellus PE	3	3	1	2
A0A023FNY3	Putative map kinase-interacting kinase	Amblyomma cajennense PE	0	1	1	6
A0A023FNJ5	Uncharacterized protein (Fragment)	Amblyomma cajennense PE	0	2	4	5
A0A023FE20	Putative secreted protein	Amblyomma cajennense PE	0	1	3	5
A0A023FKC2	Putative lipid exporter abca1 (Fragment)	Amblyomma cajennense PE	0	2	2	4
B7PXM2	Putative uncharacterized protein	Ixodes scapularis GN	0	1	3	3
B7QAU6	Putative uncharacterized protein	Ixodes scapularis GN	0	2	1	3
B7QK37	Putative uncharacterized protein	Ixodes scapularis GN	0	1	1	3
G3MNU6	Putative uncharacterized protein	Amblyomma maculatum PE	0	1	1	3
G3MME3	Putative uncharacterized protein	Amblyomma maculatum PE	0	1	1	3
B7P6B0	Aconitase/homoaconitase, putative (Fragment)	Ixodes scapularis GN	0	2	1	2
B7PSZ0	Ferredoxin reductase, putative	Ixodes scapularis GN	0	1	1	2
G3MRZ8	Putative uncharacterized protein	Amblyomma maculatum PE	0	1	1	2
V5H964	Putative tick metalloprotease (Fragment)	Ixodes ricinus PE	0	1	1	2
B7PD46	Putative uncharacterized protein	Ixodes scapularis GN	0	1	1	2
B7PBX3	Transient receptor potential channel 4, putative	Ixodes scapularis GN	0	1	1	2
B7Q6Y4	Transmembrane protein, putative	Ixodes scapularis GN	0	1	1	2
L7M046	Putative cuticular protein	Rhipicephalus pulchellus PE	0	1	1	2
A0A023FZK2	Putative 26s proteasome regulatory complex atpase rpt2	Amblyomma parvum PE	4	0	1	2
B7PD33	Kelch repeat protein, putative	Ixodes scapularis GN	3	0	2	2
L7MCQ3	Putative termination of g-protein coupled receptor signaling pathway (Fragment)	Rhipicephalus pulchellus PE	5	0	1	2
H9B3Y5	Dopamine type 1 receptor (Fragment)	Rhipicephalus microplus PE	4	0	1	2
A0A023G1T3	Uncharacterized protein	Amblyomma parvum PE	3	0	1	2
A0A023FCM5	Uncharacterized protein (Fragment)	Amblyomma cajennense PE	3	0	3	4
A0A023G6U3	Putative lipoprotein amino terminal region (Fragment)	Amblyomma triste PE	2	0	2	4
E3SS17	Translation elongation factor EF1-alpha (Fragment)	Ixodes persulcatus PE	3	0	1	4
A0A023FL05	Adenylosuccinate synthetase (Fragment)	Amblyomma cajennense PE	2	0	1	4
B7PSV0	Cytochrome P450, putative (Fragment)	Ixodes scapularis GN	3	0	1	2
A0A023FGR8	Putative 40s ribosomal protein s14	Amblyomma cajennense PE	3	0	1	2
V5HEM6	Putative pheromone receptor transcription factor (Fragment)	Ixodes ricinus PE	2	0	1	2
A0A023FVP9	Putative piggybac (Fragment)	Amblyomma parvum PE	2	0	1	2
V5H0K6	Putative tick metalloprotease	Ixodes ricinus PE	2	0	1	2
A0A023FWF7	Putative dna excision repair protein xpa/xpac/rad14 (Fragment)	Amblyomma parvum PE	2	0	1	2
B7PLC9	Putative uncharacterized protein	Ixodes scapularis GN	2	0	1	2
B7PP20	Ubiquitin-conjugating enzyme, putative	Ixodes scapularis GN	2	0	1	2
A0A023FV76	Putative member of the intramitochondrial sorting protein family (Fragment)	Amblyomma parvum PE	1	0	1	4
V5HWT5	Putative eukaryotic translation initiation factor 2d	Ixodes ricinus PE	1	0	1	3
V5H2M0	Putative zn-finger protein (Fragment)	Ixodes ricinus PE	1	0	1	3
V5HLE2	Putative transcriptional coactivator (Fragment)	Ixodes ricinus PE	1	0	1	3
L7LW71	Uncharacterized protein	Rhipicephalus pulchellus PE	3	0	3	2
V5HWI5	Putative cysteine-rich protein (Fragment)	Ixodes ricinus PE	1	0	2	2
B7P7T8	Protein lunapark-A, putative	Ixodes scapularis GN	1	0	2	2
L7LXN0	Uncharacterized protein	Rhipicephalus pulchellus PE	3	0	1	2
L7LW89	Putative rna polymerase ii degradation factor 1	Rhipicephalus pulchellus PE	2	0	1	2
B7Q337	G-protein coupled octopamine receptor, putative (Fragment)	Ixodes scapularis GN	2	0	1	2
B7QFT6	Zinc finger protein, putative (Fragment)	Ixodes scapularis GN	1	0	1	2
V5H740	Putative long-chain-acyl-coa synthetase	Ixodes ricinus PE	1	0	1	2
B7PIK3	Putative uncharacterized protein (Fragment)	Ixodes scapularis GN	1	0	1	2
B7PTN0	Translocation protein SEC62, putative	Ixodes scapularis GN	1	0	1	2
A0A023FTS0	Putative 26s proteasome subunit rpn7 (Fragment)	Amblyomma parvum PE	1	0	1	2
A0A023G7I2	Putative wd repeat domain 77	Amblyomma triste PE	1	0	1	2
A0A023GKT9	Putative regulator of nonsense transcripts 3a	Amblyomma triste PE	1	0	1	2
B7QAY4	ABC transporter, putative (Fragment)	Ixodes scapularis GN	0	0	3	6
L7MJ52	Putative vesicular amine transporter (Fragment)	Rhipicephalus pulchellus PE	0	0	2	5
Q6QVL7	NPC1	Ornithodoros moubata PE	0	0	1	4
B7QC48	Medium-chain acyl-CoA dehydrogenase, putative (Fragment)	Ixodes scapularis GN	0	0	1	4
L7M8S9	Uncharacterized protein	Rhipicephalus pulchellus PE	0	0	3	3
B7PQ25	Syntaxin-18, putative	Ixodes scapularis GN	0	0	1	3
B7PYP1	Putative uncharacterized protein	Ixodes scapularis GN	0	0	1	3
V5IJI7	Putative methylated histone residue binding protein (Fragment)	Ixodes ricinus PE	0	0	1	3
A0A023FCA5	Uncharacterized protein	Amblyomma cajennense PE	0	0	1	3
B7P584	Cytochrome P450, putative (Fragment)	Ixodes scapularis GN	0	0	1	3
A0A023FMC6	Putative dim gamma-tubulin 1	Amblyomma cajennense PE	0	0	1	3
A0A023FP74	Putative chorion b-zip transcription factor mori chorion b-zip transcription factor	Amblyomma cajennense PE	0	0	1	3
L7MBI5	Uncharacterized protein (Fragment)	Rhipicephalus pulchellus PE	0	0	4	2
B7PBL8	Secreted protein, putative (Fragment)	Ixodes scapularis GN	0	0	3	2
B7PLN8	Secreted protein, putative	Ixodes scapularis GN	0	0	3	2
L7LZ12	Uncharacterized protein	Rhipicephalus pulchellus PE	0	0	2	2
L7LUA7	Uncharacterized protein	Rhipicephalus pulchellus PE	0	0	2	2
B7PYA1	Acetylcholinesterase, putative	Ixodes scapularis GN	0	0	2	2
B7QAG5	Conserved oligomeric golgi complex subunit, putative	Ixodes scapularis GN	0	0	2	2
L7LWA0	Putative mitochondrial ribosomal protein l14	Rhipicephalus pulchellus PE	0	0	2	2
B7Q428	Actin-bundling protein, putative	Ixodes scapularis GN	0	0	2	2
V5IGL3	Putative trypsin-like serine protease (Fragment)	Ixodes ricinus PE	0	0	2	2
A0A023G2B7	Putative secreted protein	Amblyomma triste PE	0	0	2	2
L7M168	Putative serine/threonine protein phosphatase 4 regulatory subunit	Rhipicephalus pulchellus PE	0	0	1	2
L7M7A1	Uncharacterized protein	Rhipicephalus pulchellus PE	0	0	1	2
L7LZE5	Uncharacterized protein	Rhipicephalus pulchellus PE	0	0	1	2
L7MI13	Putative bilaris (Fragment)	Rhipicephalus pulchellus PE	0	0	1	2
B7P7U0	Actin regulatory protein, putative	Ixodes scapularis GN	0	0	1	2
B7Q252	Putative uncharacterized protein	Ixodes scapularis GN	0	0	1	2
B7QFK2	Neprilysin, putative (Fragment)	Ixodes scapularis GN	0	0	1	2
B7PYL4	Helicase, putative (Fragment)	Ixodes scapularis GN	0	0	1	2
B7QJ77	Putative uncharacterized protein	Ixodes scapularis GN	0	0	1	2
G3MG08	Putative uncharacterized protein (Fragment)	Amblyomma maculatum PE	0	0	1	2
V5I062	Putative negative regulation of transcription by glucose	Ixodes ricinus PE	0	0	1	2
V5HST0	Putative ring finger protein (Fragment)	Ixodes ricinus PE	0	0	1	2
V5HKN7	Putative ribosomal protein l30 (Fragment)	Ixodes ricinus PE	0	0	1	2
V5H088	Putative sulfotransferase (Fragment)	Ixodes ricinus PE	0	0	1	2
V5GEH6	Uncharacterized protein	Ixodes ricinus PE	0	0	1	2
V5I3P7	Putative adp-ribosylglycohydrolase posttranslational modification (Fragment)	Ixodes ricinus PE	0	0	1	2
V5HYB2	Putative peritrophic membrane chitin binding protein	Ixodes ricinus PE	0	0	1	2
A0A023FEE0	Uncharacterized protein (Fragment)	Amblyomma cajennense PE	0	0	1	2
A0A023GKB7	Putative signal transducing adaptor protein stam/stam2	Amblyomma triste PE	0	0	1	2
M4GZZ9	40S ribosomal protein S19	Antricola delacruzi PE	0	0	1	2
L7LU01	Uncharacterized protein	Rhipicephalus pulchellus PE	0	0	1	2
V5I1Q9	Small ubiquitin-related modifier	Ixodes ricinus PE	0	0	1	2
B7P3H1	Secreted salivary gland peptide, putative	Ixodes scapularis GN	0	0	1	2
G3MSR9	Putative uncharacterized protein	Amblyomma maculatum PE	0	0	1	2
V5HEY6	Putative alpha-l-fucosidase	Ixodes ricinus PE	0	0	1	2
A0A023GH91	Peptidyl-prolyl cis-trans isomerase (Fragment)	Amblyomma triste PE	0	0	1	2
A0A023G1A3	Putative secreted protein	Amblyomma triste PE	0	0	1	2
B7P802	Map-kinase activating death domain protein, putative	Ixodes scapularis GN	6	9	0	3
A0A023G3H2	Adenosylhomocysteinase (Fragment)	Amblyomma triste PE	0	7	0	2
V5HH56	Uncharacterized protein (Fragment)	Ixodes ricinus PE	5	7	0	2
L7MF49	Uncharacterized protein (Fragment)	Rhipicephalus pulchellus PE	4	6	0	2
A0A023FLH9	Putative hydroxyacyl-coa dehydrogenase/enoyl-coa hydratase (Fragment)	Amblyomma cajennense PE	3	6	0	2
B7PKL1	Neurofilament medium polypeptide, putative (Fragment)	Ixodes scapularis GN	1	7	0	2
B7PND4	Kinesin heavy chain, putative	Ixodes scapularis GN	0	6	0	2
L7MI74	Uncharacterized protein (Fragment)	Rhipicephalus pulchellus PE	9	6	0	2
B7Q7E5	Vitellogenin, putative	Ixodes scapularis GN	6	6	0	3
L7MEV8	Putative zinc finger protein 84 (Fragment)	Rhipicephalus pulchellus PE	5	6	0	2
L7M6E8	Putative kinase a-anchor protein neurobeachin	Rhipicephalus pulchellus PE	4	5	0	3
A0A023GMD5	Putative mrna cleavage and polyadenylation factor ii complex subunit pta1	Amblyomma triste PE	4	5	0	2
L7LXY7	Diacylglycerol kinase	Rhipicephalus pulchellus PE	4	5	0	2
B7PYL0	WD-repeat protein, putative	Ixodes scapularis GN	0	5	0	2
B7QE75	Diacylglycerol kinase (Fragment)	Ixodes scapularis GN	7	23	0	2
A0A023FKH9	Putative eukaryotic translation initiation factor 3 subunit c (Fragment)	Amblyomma cajennense PE	5	4	0	2
B7Q9B7	Cytochrome P450, putative	Ixodes scapularis GN	4	4	0	2
B7P7Y7	Cement protein 3B variant, putative	Ixodes scapularis GN	3	5	0	2
G3MS17	Putative uncharacterized protein	Amblyomma maculatum PE	3	4	0	2
V5I143	Putative heat shock protein 68 (Fragment)	Ixodes ricinus PE	2	6	0	2
A0A023GM75	Putative calmodulin-binding protein (Fragment)	Amblyomma triste PE	2	4	0	2
B7PN53	Isocitrate dehydrogenase, putative (Fragment)	Ixodes scapularis GN	2	4	0	2
A0A023G6W4	Putative chloride channel protein k	Amblyomma triste PE	1	4	0	4
L7MKW2	Putative histone demethylase (Fragment)	Rhipicephalus pulchellus PE	1	4	0	3
A0A023G7G1	Putative alpha crystallins	Amblyomma triste PE	2	6	0	2
A0A023GFT4	Putative serine/threonine protein kinase	Amblyomma triste PE	1	5	0	2
L7M8D8	Putative succinate dehydrogenase fe-s protein subunit	Rhipicephalus pulchellus PE	1	4	0	2
L7M8H4	Putative e3 ubiquitin ligase	Rhipicephalus pulchellus PE	0	4	0	3
B7QDY5	Protease, putative	Ixodes scapularis GN	0	4	0	3
L7M7N8	Uncharacterized protein	Rhipicephalus pulchellus PE	0	4	0	2
L7MER4	Putative galactokinase (Fragment)	Rhipicephalus pulchellus PE	0	4	0	2
V5I167	Putative wd repeat-containing protein 11 (Fragment)	Ixodes ricinus PE	0	4	0	2
A0A023GNV8	Putative nuclear pore complex rnpl4 component sc npl4	Amblyomma triste PE	0	4	0	2
L7MHC9	Uncharacterized protein (Fragment)	Rhipicephalus pulchellus PE	5	3	0	2
B7PFY1	Putative uncharacterized protein	Ixodes scapularis GN	5	3	0	2
A0A023FU86	Putative grpe protein 1 mitochondrial (Fragment)	Amblyomma parvum PE	4	4	0	3
L7M941	Putative wd40 domain protein	Rhipicephalus pulchellus PE	4	3	0	2
A0A023G8H3	Putative eukaryotic translation initiation factor 4e nuclear import factor 1	Amblyomma triste PE	3	3	0	2
G3MNC8	Putative uncharacterized protein	Amblyomma maculatum PE	2	4	0	2
V5HEB0	Uncharacterized protein (Fragment)	Ixodes ricinus PE	2	4	0	2
B7PSN6	Putative uncharacterized protein	Ixodes scapularis GN	2	3	0	2
B7PBM3	Voltage-gated channel, putative	Ixodes scapularis GN	2	3	0	2
B7PG23	Serine proteinase inhibitor, putative	Ixodes scapularis GN	2	3	0	2
A0A023GLY0	Putative heat shock protein	Amblyomma triste PE	1	3	0	3
A0A023FZ48	Putative isocitrate dehydrogenase alpha subunit	Amblyomma parvum PE	1	5	0	2
L7MB25	Putative isocitrate dehydrogenase gamma subunit	Rhipicephalus pulchellus PE	1	3	0	2
B7PGK4	Putative uncharacterized protein	Ixodes scapularis GN	1	3	0	2
V5H8M4	Uncharacterized protein (Fragment)	Ixodes ricinus PE	1	3	0	2
A0A023FZD2	Putative mucin peritrophin salivary protein	Amblyomma parvum PE	0	3	0	11
B7PJ63	Putative uncharacterized protein	Ixodes scapularis GN	0	5	0	7
L7LX40	Putative homeobox	Rhipicephalus pulchellus PE	0	4	0	3
B7Q3J3	Aminopeptidase, putative (Fragment)	Ixodes scapularis GN	0	4	0	3
A0A023GE82	Putative tick metalloprotease 1	Amblyomma triste PE	0	3	0	3
B7QLE8	Zinc finger protein, putative	Ixodes scapularis GN	0	3	0	3
V5H592	Elongation factor Ts, mitochondrial	Ixodes ricinus PE	0	4	0	2
V5GXP7	Uncharacterized protein (Fragment)	Ixodes ricinus PE	0	4	0	2
[truncated: 3,478 more rows]

## Sheet: PIT
Tick proteins identified by PIT. FDR < 5%, ≥ 2 peptides per protein
Description			PSMs Control 1	PSMs Control 2	PSMs Infected 1	PSMs Infected 2
Putative uncharacterized protein OS=Ixodes scapularis GN=IscW_ISCW021850 PE=4 SV=1|e=3.1012E-110|from=45|to=1430|frame=-3|Fragment_2 - [Locus_12340_Transcript_1/1_Confidence_1.000_Length_1435|.|tr|B7Q5J7|B7Q5J7_IXOSC]	B7Q5J7	Ixodes scapularis GN	312	332	202	411
transcript|tr|B7Q381|B7Q381_IXOSC Putative uncharacterized protein OS=Ixodes scapularis GN=IscW_ISCW009032 PE=4 SV=1|e=2.6675E-111|from=2|to=1093|frame=-2|Fragment_2 - [Locus_8171_Transcript_1/2_Confidence_0.667_Length_1370|representative]	B7Q381	Ixodes scapularis GN	124	152	96	168
Kettin, putative OS=Ixodes scapularis GN=IscW_ISCW017764 PE=4 SV=1"|e=9.5949E-171|from=903|to=4976|frame=-3|Fragment_14 - [Locus_2123_Transcript_2/2_Confidence_0.667_Length_5029|.|"tr|B7PGA6|B7PGA6_IXOSC]	B7PGA6	Ixodes scapularis GN	90	110	79	183
representative transcript|tr|A8WAA7|A8WAA7_DERVA Vitellogenin-2 OS=Dermacentor variabilis GN=Vg-2 PE=2 SV=2|e=0|from=6|to=1409|frame=3|Fragment_2 - [Locus_122_Transcript_1/5_Confidence_0.615_Length_1411|UNIGENE]	A8WAA7	Dermacentor variabilis GN	550	643	196	306
representative transcript|tr|L7ML13|L7ML13_9ACAR Putative animal-type fatty acid synthase (Fragment) OS=Rhipicephalus pulchellus PE=2 SV=1|e=6.221E-167|from=1|to=1809|frame=1|Fragment_4 - [Locus_10022_Transcript_1/1_Confidence_1.000_Length_1813|UNIGENE]	L7ML13	Rhipicephalus pulchellus PE	126	143	79	163
Putative ca2+-binding actin-bundling protein (Fragment) OS=Rhipicephalus pulchellus PE=2 SV=1|e=7.08715E-21|from=1|to=621|frame=1|Fragment_2 - [Locus_18421_Transcript_1/1_Confidence_1.000_Length_621|.|tr|L7MFA2|L7MFA2_9ACAR]	L7MFA2	Rhipicephalus pulchellus PE	91	110	71	115
transcript|"tr|B7PYN9|B7PYN9_IXOSC Fatty acid synthase, putative OS=Ixodes scapularis GN=IscW_ISCW009053 PE=4 SV=1"|e=7.69404E-32|from=4|to=390|frame=1|Fragment_2 - [Locus_15869_Transcript_1/1_Confidence_1.000_Length_392|representative]	B7PYN9	Ixodes scapularis GN	99	110	68	103
Putative beta-spectrin OS=Rhipicephalus pulchellus PE=2 SV=1|e=8.59039E-97|from=1226|to=4606|frame=-2|Fragment_1 - [Locus_1287_Transcript_1/1_Confidence_1.000_Length_4706|.|tr|L7M942|L7M942_9ACAR]	L7M942	Rhipicephalus pulchellus PE	102	89	109	116
transcript|tr|L7MH88|L7MH88_9ACAR Uncharacterized protein (Fragment) OS=Rhipicephalus pulchellus PE=2 SV=1|e=4.61497E-36|from=1|to=735|frame=1|Fragment_3 - [Locus_3251_Transcript_1/1_Confidence_1.000_Length_739|representative]	L7MH88	Rhipicephalus pulchellus PE	71	113	78	136
Putative megalin OS=Rhipicephalus pulchellus PE=2 SV=1|e=9.64101E-12|from=8|to=328|frame=2|Fragment_1 - [Locus_14272_Transcript_1/1_Confidence_1.000_Length_346|.|tr|L7M940|L7M940_9ACAR]	L7M940	Rhipicephalus pulchellus PE	102	123	29	134
transcript|tr|A8WAA7|A8WAA7_DERVA Vitellogenin-2 OS=Dermacentor variabilis GN=Vg-2 PE=2 SV=2|e=0|from=3|to=2783|frame=-3|Fragment_1 - [Locus_124_Transcript_6/7_Confidence_0.667_Length_2785|representative]	A8WAA7	Dermacentor variabilis GN	390	478	139	236
Putative nidogen (Fragment) OS=Rhipicephalus pulchellus PE=2 SV=1|e=9.7052E-25|from=4|to=258|frame=1|Fragment_1 - [Locus_17349_Transcript_1/1_Confidence_1.000_Length_260|.|tr|L7MIE2|L7MIE2_9ACAR]	L7MIE2	Rhipicephalus pulchellus PE	127	146	23	174
transcript|tr|L7ML13|L7ML13_9ACAR Putative animal-type fatty acid synthase (Fragment) OS=Rhipicephalus pulchellus PE=2 SV=1|e=3.15205E-87|from=3|to=836|frame=3|Fragment_1 - [Locus_15660_Transcript_1/1_Confidence_1.000_Length_846|representative]	L7ML13	Rhipicephalus pulchellus PE	108	132	50	113
transcript|tr|Q5EG54|Q5EG54_DERVA Vitellogenin OS=Dermacentor variabilis GN=Vg PE=2 SV=2|e=1.0638E-97|from=115|to=1308|frame=1|Fragment_5 - [Locus_1998_Transcript_1/3_Confidence_0.714_Length_4941|representative]	Q5EG54	Dermacentor variabilis GN	351	377	126	198
transcript|tr|L7MK99|L7MK99_9ACAR Putative tick transposon (Fragment) OS=Rhipicephalus pulchellus PE=2 SV=1|e=9.9658E-67|from=482|to=979|frame=-2|Fragment_1 - [Locus_5238_Transcript_1/1_Confidence_1.000_Length_980|representative]	L7MK99	Rhipicephalus pulchellus PE	48	65	50	78
Serine proteinase inhibitor, putative OS=Ixodes scapularis GN=IscW_ISCW003862 PE=4 SV=1"|e=9.28588E-83|from=952|to=2241|frame=1|Fragment_1 - [Locus_662_Transcript_1/8_Confidence_0.708_Length_2868|.|"tr|B7PG23|B7PG23_IXOSC]	B7PG23	Ixodes scapularis GN	132	160	61	86
transcript|tr|L7MI62|L7MI62_9ACAR Putative carboxyl transferase domain protein (Fragment) OS=Rhipicephalus pulchellus PE=2 SV=1|e=4.0237E-131|from=3|to=812|frame=-1|Fragment_2 - [Locus_3793_Transcript_1/1_Confidence_1.000_Length_923|representative]	L7MI62	Rhipicephalus pulchellus PE	52	59	38	69
Notch-like protein OS=Boophilus microplus GN=BOTCH PE=2 SV=1|e=8.06153E-27|from=3|to=869|frame=3|Fragment_4 - [Locus_13366_Transcript_1/1_Confidence_1.000_Length_1250|.|tr|Q8I6X6|Q8I6X6_BOOMI]	Q8I6X6	Boophilus microplus GN	44	85	26	85
transcript|tr|L7LYF9|L7LYF9_9ACAR Putative deah-box rna helicase OS=Rhipicephalus pulchellus PE=2 SV=1|e=1.48339E-13|from=2|to=103|frame=2|Fragment_1 - [Locus_666_Transcript_1/1_Confidence_1.000_Length_2725|representative]	L7LYF9	Rhipicephalus pulchellus PE	50	57	44	70
representative transcript|tr|L7LZB8|L7LZB8_9ACAR Putative short transient receptor potential channel 4-associated protein OS=Rhipicephalus pulchellus PE=2 SV=1|e=0|from=3|to=2249|frame=3|Fragment_1 - [Locus_4539_Transcript_4/5_Confidence_0.600_Length_2400	L7LZB8	Rhipicephalus pulchellus PE	49	73	38	65
representative transcript|tr|L7LX15|L7LX15_9ACAR Putative tick transposon OS=Rhipicephalus pulchellus PE=2 SV=1|e=2.7862E-149|from=2|to=1219|frame=-1|Fragment_1 - [Locus_5635_Transcript_1/1_Confidence_1.000_Length_1225|UNIGENE]	L7LX15	Rhipicephalus pulchellus PE	58	90	28	74
Putative myosin class ii heavy chain OS=Rhipicephalus pulchellus PE=2 SV=1|e=9.76892E-59|from=3|to=881|frame=-3|Fragment_1 - [Locus_13527_Transcript_1/1_Confidence_1.000_Length_967|.|tr|L7M1Y9|L7M1Y9_9ACAR]	L7M1Y9	Rhipicephalus pulchellus PE	41	38	37	56
transcript|tr|L7M940|L7M940_9ACAR Putative megalin OS=Rhipicephalus pulchellus PE=2 SV=1|e=6.3659E-72|from=3|to=368|frame=3|Fragment_1 - [Locus_24100_Transcript_1/1_Confidence_1.000_Length_370|representative]	L7M940	Rhipicephalus pulchellus PE	71	86	38	81
representative transcript|tr|G9M4L6|G9M4L6_HAELO Vitellogenin-B OS=Haemaphysalis longicornis GN=HlVg-B PE=2 SV=1|e=7.78E-170|from=5|to=1435|frame=2|Fragment_1 - [Locus_5066_Transcript_1/1_Confidence_1.000_Length_1437|UNIGENE]	G9M4L6	Haemaphysalis longicornis GN	36	59	25	57
transcript|tr|L7M721|L7M721_9ACAR Putative lipoprotein amino terminal region OS=Rhipicephalus pulchellus PE=2 SV=1|e=0|from=69|to=4670|frame=3|Fragment_1 - [Locus_632_Transcript_1/1_Confidence_1.000_Length_4936|representative]	L7M721	Rhipicephalus pulchellus PE	187	178	42	65
representative transcript|tr|G3MNC2|G3MNC2_9ACAR Putative uncharacterized protein OS=Amblyomma maculatum PE=2 SV=1|e=6.24714E-60|from=1|to=837|frame=1|Fragment_1 - [Locus_840_Transcript_3/3_Confidence_0.818_Length_914|UNIGENE]	G3MNC2	Amblyomma maculatum PE	111	133	59	107
representative transcript|tr|L7LWE4|L7LWE4_9ACAR Uncharacterized protein OS=Rhipicephalus pulchellus PE=2 SV=1|e=1.3915E-63|from=3|to=308|frame=3|Fragment_1 - [Locus_20794_Transcript_1/1_Confidence_1.000_Length_313|UNIGENE]	L7LWE4	Rhipicephalus pulchellus PE	71	66	32	114
representative transcript|tr|L7LZK0|L7LZK0_9ACAR Putative corticosteroid 11-beta-dehydrogenase OS=Rhipicephalus pulchellus PE=2 SV=1|e=9.3012E-103|from=447|to=1502|frame=3|Fragment_3 - [Locus_3129_Transcript_1/3_Confidence_0.667_Length_3272|UNIGENE]	L7LZK0	Rhipicephalus pulchellus PE	43	72	23	59
representative transcript|tr|L7M1A0|L7M1A0_9ACAR Putative tick transposon OS=Rhipicephalus pulchellus PE=2 SV=1|e=7.1579E-107|from=3|to=1064|frame=3|Fragment_2 - [Locus_10281_Transcript_1/1_Confidence_1.000_Length_1159|UNIGENE]	L7M1A0	Rhipicephalus pulchellus PE	46	44	42	60
representative transcript|tr|L7M5U5|L7M5U5_9ACAR Putative bifunctional glutamate/proline--trna ligase OS=Rhipicephalus pulchellus PE=2 SV=1|e=0|from=1|to=3819|frame=1|Fragment_4 - [Locus_1793_Transcript_1/1_Confidence_1.000_Length_3870|UNIGENE]	L7M5U5	Rhipicephalus pulchellus PE	63	56	34	54
representative transcript|tr|L7M947|L7M947_9ACAR Putative myosin class v heavy chain OS=Rhipicephalus pulchellus PE=2 SV=1|e=8.162E-115|from=3|to=608|frame=3|Fragment_1 - [Locus_20339_Transcript_1/1_Confidence_1.000_Length_608|UNIGENE]	L7M947	Rhipicephalus pulchellus PE	40	46	19	55
transcript|tr|L7MHV9|L7MHV9_9ACAR Uncharacterized protein (Fragment) OS=Rhipicephalus pulchellus PE=2 SV=1|e=0|from=3|to=1409|frame=-1|Fragment_1 - [Locus_6720_Transcript_1/1_Confidence_1.000_Length_1409|representative]	L7MHV9	Rhipicephalus pulchellus PE	58	77	30	89
representative transcript|"tr|B7PSW2|B7PSW2_IXOSC Cytochrome P450, putative OS=Ixodes scapularis GN=IscW_ISCW007349 PE=3 SV=1"|e=9.92067E-77|from=1348|to=2703|frame=-1|Fragment_3 - [Locus_902_Transcript_2/5_Confidence_0.714_Length_2862|UNIGENE]	B7PSW2	Ixodes scapularis GN	64	40	27	54
transcript|tr|L7M3I9|L7M3I9_9ACAR Putative peptide exporter abc superfamily OS=Rhipicephalus pulchellus PE=2 SV=1|e=0|from=287|to=4519|frame=2|Fragment_5 - [Locus_573_Transcript_1/2_Confidence_0.750_Length_6275|representative]	L7M3I9	Rhipicephalus pulchellus PE	39	51	13	56
representative transcript|tr|G3MPE8|G3MPE8_9ACAR Putative uncharacterized protein OS=Amblyomma maculatum PE=2 SV=1|e=6.5303E-156|from=272|to=1774|frame=-1|Fragment_2 - [Locus_3718_Transcript_1/1_Confidence_1.000_Length_1831|UNIGENE]	G3MPE8	Amblyomma maculatum PE	48	44	40	52
representative transcript|tr|Q5EG54|Q5EG54_DERVA Vitellogenin OS=Dermacentor variabilis GN=Vg PE=2 SV=2|e=8.885E-99|from=6401|to=7594|frame=-1|Fragment_5 - [Locus_492_Transcript_1/4_Confidence_0.750_Length_7708|UNIGENE]	Q5EG54	Dermacentor variabilis GN	195	206	53	108
transcript|tr|L7LX15|L7LX15_9ACAR Putative tick transposon OS=Rhipicephalus pulchellus PE=2 SV=1|e=5.12641E-56|from=6|to=725|frame=3|Fragment_1 - [Locus_10134_Transcript_1/1_Confidence_1.000_Length_727|representative]	L7LX15	Rhipicephalus pulchellus PE	57	66	35	51
representative transcript|tr|L7M3K3|L7M3K3_9ACAR Putative valine--trna ligase OS=Rhipicephalus pulchellus PE=2 SV=1|e=0|from=193|to=3345|frame=1|Fragment_3 - [Locus_3364_Transcript_1/1_Confidence_1.000_Length_3502|UNIGENE]	L7M3K3	Rhipicephalus pulchellus PE	54	72	22	50
transcript|"tr|B7Q368|B7Q368_IXOSC High-density lipoprotein-binding protein, putative OS=Ixodes scapularis GN=IscW_ISCW008601 PE=4 SV=1"|e=0|from=278|to=4012|frame=2|Fragment_3 - [Locus_191_Transcript_1/6_Confidence_0.667_Length_5647|representative]	B7Q368	Ixodes scapularis GN	34	39	37	43
transcript|tr|L7M672|L7M672_9ACAR Uncharacterized protein OS=Rhipicephalus pulchellus PE=2 SV=1|e=3.18071E-23|from=6|to=314|frame=-1|Fragment_3 - [Locus_7817_Transcript_1/1_Confidence_1.000_Length_326|representative]	L7M672	Rhipicephalus pulchellus PE	48	73	48	71
Papilin (Fragment) OS=Boophilus microplus GN=Ppn PE=4 SV=1|e=7.40924E-44|from=1157|to=2086|frame=2|Fragment_3 - [Locus_901_Transcript_7/8_Confidence_0.455_Length_2531|.|tr|G0WRZ9|G0WRZ9_BOOMI]	G0WRZ9	Boophilus microplus GN	59	50	45	42
transcript|tr|L7MAR7|L7MAR7_9ACAR Putative tick transposon (Fragment) OS=Rhipicephalus pulchellus PE=2 SV=1|e=0|from=295|to=5181|frame=-1|Fragment_3 - [Locus_2362_Transcript_1/3_Confidence_0.778_Length_6021|representative]	L7MAR7	Rhipicephalus pulchellus PE	34	44	34	39
representative transcript|"tr|B7QC85|B7QC85_IXOSC Tumor rejection antigen (Gp96), putative (Fragment) OS=Ixodes scapularis GN=IscW_ISCW022766 PE=3 SV=1"|e=0|from=165|to=2408|frame=-3|Fragment_6 - [Locus_474_Transcript_1/1_Confidence_1.000_Length_2557|UNIG	B7QC85	Ixodes scapularis GN	36	36	21	43
transcript|tr|L7MC20|L7MC20_9ACAR Putative cytochrome (Fragment) OS=Rhipicephalus pulchellus PE=2 SV=1|e=8.8842E-155|from=3|to=1415|frame=3|Fragment_1 - [Locus_393_Transcript_6/8_Confidence_0.391_Length_3590|representative]	L7MC20	Rhipicephalus pulchellus PE	79	77	44	43
transcript|"tr|B7PSW2|B7PSW2_IXOSC Cytochrome P450, putative OS=Ixodes scapularis GN=IscW_ISCW007349 PE=3 SV=1"|e=7.2992E-114|from=297|to=1853|frame=-1|Fragment_1 - [Locus_326_Transcript_2/9_Confidence_0.595_Length_2117|representative]	B7PSW2	Ixodes scapularis GN	63	55	18	38
representative transcript|"tr|B7QH79|B7QH79_IXOSC Secreted protein, putative OS=Ixodes scapularis GN=IscW_ISCW023166 PE=4 SV=1"|e=9.92463E-46|from=2218|to=2919|frame=-2|Fragment_1 - [Locus_320_Transcript_1/10_Confidence_0.697_Length_3106|UNIGENE]	B7QH79	Ixodes scapularis GN	24	51	14	44
transcript|"tr|B7PTP7|B7PTP7_IXOSC Plexin A, putative OS=Ixodes scapularis GN=IscW_ISCW007151 PE=4 SV=1"|e=9.39564E-88|from=1|to=480|frame=-1|Fragment_1 - [Locus_8057_Transcript_1/1_Confidence_1.000_Length_480|representative]	B7PTP7	Ixodes scapularis GN	28	24	16	57
representative transcript|tr|G3MM77|G3MM77_9ACAR Putative uncharacterized protein OS=Amblyomma maculatum PE=2 SV=1|e=0|from=106|to=2082|frame=1|Fragment_2 - [Locus_900_Transcript_2/5_Confidence_0.692_Length_2841|UNIGENE]	G3MM77	Amblyomma maculatum PE	41	42	13	58
transcript|tr|L7MDN5|L7MDN5_9ACAR Putative golgi apparatus protein cysteine-rich fibroblast growth factor receptor (Fragment) OS=Rhipicephalus pulchellus PE=2 SV=1|e=0|from=301|to=1794|frame=1|Fragment_1 - [Locus_10493_Transcript_1/1_Confidence_1.000_Leng	L7MDN5	Rhipicephalus pulchellus PE	45	59	32	36
transcript|tr|L7LZC3|L7LZC3_9ACAR Putative long-chain acyl-coa synthetase amp-forming OS=Rhipicephalus pulchellus PE=2 SV=1|e=6.0786E-172|from=288|to=1724|frame=3|Fragment_1 - [Locus_4189_Transcript_4/6_Confidence_0.556_Length_1725|representative]	L7LZC3	Rhipicephalus pulchellus PE	40	32	34	50
representative transcript|tr|L7M1I1|L7M1I1_9ACAR Putative integrin beta subunit OS=Rhipicephalus pulchellus PE=2 SV=1|e=0|from=188|to=2590|frame=2|Fragment_1 - [Locus_1312_Transcript_1/7_Confidence_0.684_Length_5126|UNIGENE]	L7M1I1	Rhipicephalus pulchellus PE	49	52	25	52
representative transcript|tr|L7M5X0|L7M5X0_9ACAR Putative secreted/periplasmic zn-dependent peptidase OS=Rhipicephalus pulchellus PE=2 SV=1|e=4.358E-164|from=1|to=984|frame=1|Fragment_1 - [Locus_10429_Transcript_1/1_Confidence_1.000_Length_1305|UNIGENE]	L7M5X0	Rhipicephalus pulchellus PE	14	35	18	40
representative transcript|tr|L7MEA8|L7MEA8_9ACAR Putative cyclopropane fatty acid synthase and related methyltransferase cell envelope bioproteinsis (Fragment) OS=Rhipicephalus pulchellus PE=2 SV=1|e=9.1255E-164|from=243|to=1121|frame=3|Fragment_1 - [Locu	L7MEA8	Rhipicephalus pulchellus PE	76	75	30	50
transcript|tr|L7MIJ5|L7MIJ5_9ACAR Putative ubiquitin activating enzyme uba1 (Fragment) OS=Rhipicephalus pulchellus PE=2 SV=1|e=0|from=302|to=3352|frame=2|Fragment_1 - [Locus_2727_Transcript_1/2_Confidence_0.750_Length_4335|representative]	L7MIJ5	Rhipicephalus pulchellus PE	36	39	22	37
transcript|tr|L7LYA9|L7LYA9_9ACAR Putative tick transposon OS=Rhipicephalus pulchellus PE=2 SV=1|e=4.61323E-38|from=3|to=404|frame=-3|Fragment_1 - [Locus_21196_Transcript_1/1_Confidence_1.000_Length_406|representative]	L7LYA9	Rhipicephalus pulchellus PE	25	31	31	55
transcript|"tr|B7PVC0|B7PVC0_IXOSC Dual oxidase 1, putative OS=Ixodes scapularis GN=IscW_ISCW007865 PE=4 SV=1"|e=5.83002E-12|from=22|to=360|frame=-2|Fragment_2 - [Locus_10414_Transcript_1/1_Confidence_1.000_Length_370|representative]	B7PVC0	Ixodes scapularis GN	36	34	26	39
representative transcript|tr|L7MJW1|L7MJW1_9ACAR Uncharacterized protein (Fragment) OS=Rhipicephalus pulchellus PE=2 SV=1|e=1.6667E-49|from=90|to=749|frame=3|Fragment_1 - [Locus_16073_Transcript_1/2_Confidence_0.750_Length_749|UNIGENE]	L7MJW1	Rhipicephalus pulchellus PE	43	58	35	50
representative transcript|tr|G3MKY2|G3MKY2_9ACAR Putative uncharacterized protein OS=Amblyomma maculatum PE=2 SV=1|e=1.11187E-36|from=3|to=335|frame=3|Fragment_1 - [Locus_24803_Transcript_1/1_Confidence_1.000_Length_336|UNIGENE]	G3MKY2	Amblyomma maculatum PE	40	46	24	51
representative transcript|tr|L7M952|L7M952_9ACAR Uncharacterized protein OS=Rhipicephalus pulchellus PE=2 SV=1|e=3.3916E-159|from=2|to=904|frame=-3|Fragment_2 - [Locus_1851_Transcript_1/1_Confidence_1.000_Length_906|UNIGENE]	L7M952	Rhipicephalus pulchellus PE	23	38	20	41
representative transcript|tr|L7M9P7|L7M9P7_9ACAR Putative membrane coat complex retromer subunit vps35 OS=Rhipicephalus pulchellus PE=2 SV=1|e=0|from=181|to=2634|frame=1|Fragment_3 - [Locus_6097_Transcript_1/3_Confidence_0.571_Length_3563|UNIGENE]	L7M9P7	Rhipicephalus pulchellus PE	11	9	20	31
transcript|"tr|B7Q5G8|B7Q5G8_IXOSC Spectrin beta chain, putative OS=Ixodes scapularis GN=IscW_ISCW021585 PE=4 SV=1"|e=3.81785E-88|from=1|to=606|frame=-2|Fragment_1 - [Locus_2469_Transcript_1/1_Confidence_1.000_Length_607|representative]	B7Q5G8	Ixodes scapularis GN	18	34	16	38
representative transcript|tr|L7MJ95|L7MJ95_9ACAR Putative transcription factor 5qnca (Fragment) OS=Rhipicephalus pulchellus PE=2 SV=1|e=9.90719E-92|from=4|to=531|frame=-3|Fragment_1 - [Locus_11851_Transcript_1/1_Confidence_1.000_Length_533|UNIGENE]	L7MJ95	Rhipicephalus pulchellus PE	38	37	2	43
representative transcript|tr|B7QCK2|B7QCK2_IXOSC ATP synthase subunit alpha OS=Ixodes scapularis GN=IscW_ISCW011988 PE=3 SV=1|e=0|from=56|to=1717|frame=2|Fragment_1 - [Locus_8553_Transcript_1/1_Confidence_1.000_Length_1856|UNIGENE]	B7QCK2	Ixodes scapularis GN	64	76	52	47
transcript|tr|A0SHR2|A0SHR2_AMBVA Protein disulfide isomerase OS=Amblyomma variegatum PE=2 SV=1|e=0|from=759|to=2219|frame=-2|Fragment_1 - [Locus_3143_Transcript_2/2_Confidence_0.667_Length_2310|representative]	A0SHR2	Amblyomma variegatum PE	28	44	33	42
transcript|tr|B6ZH52|B6ZH52_TACTR Complement component 3 OS=Tachypleus tridentatus GN=TtC3 PE=2 SV=1|e=6.053E-126|from=27|to=1610|frame=-3|Fragment_1 - [Locus_1624_Transcript_2/9_Confidence_0.458_Length_1612|representative]	B6ZH52	Tachypleus tridentatus GN	31	18	25	43
representative transcript|tr|L7LTM1|L7LTM1_9ACAR Putative heptalaris OS=Rhipicephalus pulchellus PE=2 SV=1|e=7.03833E-71|from=3|to=368|frame=3|Fragment_1 - [Locus_23841_Transcript_1/1_Confidence_1.000_Length_369|UNIGENE]	L7LTM1	Rhipicephalus pulchellus PE	22	14	15	33
transcript|tr|L7LYY5|L7LYY5_9ACAR Putative rna helicase nonsense mrna reducing factor pnorf1 OS=Rhipicephalus pulchellus PE=2 SV=1|e=0|from=86|to=1630|frame=-2|Fragment_1 - [Locus_8432_Transcript_1/1_Confidence_1.000_Length_1631|representative]	L7LYY5	Rhipicephalus pulchellus PE	20	26	17	47
transcript|tr|L7MMH1|L7MMH1_9ACAR Putative tick transposon (Fragment) OS=Rhipicephalus pulchellus PE=2 SV=1|e=6.29416E-54|from=3|to=389|frame=3|Fragment_1 - [Locus_17827_Transcript_1/1_Confidence_1.000_Length_622|representative]	L7MMH1	Rhipicephalus pulchellus PE	65	63	12	46
representative transcript|tr|G3MHG3|G3MHG3_9ACAR Putative uncharacterized protein (Fragment) OS=Amblyomma maculatum PE=2 SV=1|e=9.4251E-119|from=135|to=1580|frame=3|Fragment_2 - [Locus_6635_Transcript_1/1_Confidence_1.000_Length_1620|UNIGENE]	G3MHG3	Amblyomma maculatum PE	42	61	31	42
representative transcript|"tr|B7PJA9|B7PJA9_IXOSC Killer toxin-resistance protein, putative OS=Ixodes scapularis GN=IscW_ISCW004613 PE=4 SV=1"|e=0|from=16|to=4089|frame=1|Fragment_2 - [Locus_952_Transcript_1/3_Confidence_0.714_Length_4090|UNIGENE]	B7PJA9	Ixodes scapularis GN	40	36	35	105
representative transcript|"tr|B7QLB2|B7QLB2_IXOSC CDC42 binding protein kinase alpha, putative OS=Ixodes scapularis GN=IscW_ISCW014720 PE=4 SV=1"|e=0|from=1510|to=3357|frame=1|Fragment_7 - [Locus_2032_Transcript_1/1_Confidence_1.000_Length_5113|UNIGENE]	B7QLB2	Ixodes scapularis GN	38	43	40	61
transcript|tr|B7PXC1|B7PXC1_IXOSC Putative uncharacterized protein OS=Ixodes scapularis GN=IscW_ISCW020313 PE=4 SV=1|e=8.7713E-87|from=3|to=443|frame=-2|Fragment_1 - [Locus_18092_Transcript_1/1_Confidence_1.000_Length_447|representative]	B7PXC1	Ixodes scapularis GN	41	53	25	53
transcript|tr|L7ML81|L7ML81_9ACAR Uncharacterized protein (Fragment) OS=Rhipicephalus pulchellus PE=2 SV=1|e=0|from=223|to=3705|frame=1|Fragment_2 - [Locus_2127_Transcript_1/1_Confidence_1.000_Length_3858|representative]	L7ML81	Rhipicephalus pulchellus PE	42	47	14	41
Putative tick transposon (Fragment) OS=Rhipicephalus pulchellus PE=2 SV=1|e=8.30152E-27|from=3|to=98|frame=3|Fragment_1 - [Locus_23570_Transcript_1/1_Confidence_1.000_Length_334|.|tr|L7MMH3|L7MMH3_9ACAR]	L7MMH3	Rhipicephalus pulchellus PE	56	76	16	57
representative transcript|tr|G3MNR3|G3MNR3_9ACAR Putative uncharacterized protein OS=Amblyomma maculatum PE=2 SV=1|e=3.3844E-148|from=2|to=895|frame=2|Fragment_1 - [Locus_3681_Transcript_2/2_Confidence_0.667_Length_1068|UNIGENE]	G3MNR3	Amblyomma maculatum PE	37	1	7	32
representative transcript|tr|L7MCD8|L7MCD8_9ACAR Uncharacterized protein (Fragment) OS=Rhipicephalus pulchellus PE=2 SV=1|e=0|from=2|to=3085|frame=2|Fragment_6 - [Locus_2640_Transcript_2/2_Confidence_1.000_Length_3772|UNIGENE]	L7MCD8	Rhipicephalus pulchellus PE	19	35	23	43
representative transcript|tr|L7LZX5|L7LZX5_9ACAR Putative global transcriptional regulator cell division control protein OS=Rhipicephalus pulchellus PE=2 SV=1|e=8.7471E-166|from=35|to=934|frame=2|Fragment_1 - [Locus_4602_Transcript_1/1_Confidence_1.000_Le	L7LZX5	Rhipicephalus pulchellus PE	41	42	28	37
representative transcript|tr|L7M741|L7M741_9ACAR Putative hydroxyacyl-coenzyme a dehydrogenase/3-ketoacyl-coenzyme a thiolase/enoyl-coenzyme a hydrat OS=Rhipicephalus pulchellus PE=2 SV=1|e=0|from=59|to=2350|frame=2|Fragment_2 - [Locus_1553_Transcript_1/6	L7M741	Rhipicephalus pulchellus PE	34	52	25	35
representative transcript|tr|L7MDQ3|L7MDQ3_9ACAR Uncharacterized protein (Fragment) OS=Rhipicephalus pulchellus PE=2 SV=1|e=0|from=106|to=2556|frame=-2|Fragment_5 - [Locus_5322_Transcript_1/2_Confidence_0.750_Length_2575|UNIGENE]	L7MDQ3	Rhipicephalus pulchellus PE	40	43	39	65
representative transcript|tr|L7MHY9|L7MHY9_9ACAR Uncharacterized protein (Fragment) OS=Rhipicephalus pulchellus PE=2 SV=1|e=0|from=376|to=3828|frame=-1|Fragment_1 - [Locus_2910_Transcript_1/1_Confidence_1.000_Length_3837|UNIGENE]	L7MHY9	Rhipicephalus pulchellus PE	27	37	23	32
transcript|tr|L7M979|L7M979_9ACAR Putative zinc finger protein 91 OS=Rhipicephalus pulchellus PE=2 SV=1|e=9.012E-172|from=3|to=953|frame=3|Fragment_1 - [Locus_13580_Transcript_1/1_Confidence_1.000_Length_1007|representative]	L7M979	Rhipicephalus pulchellus PE	34	40	25	42
representative transcript|tr|L7M0T0|L7M0T0_9ACAR Uncharacterized protein OS=Rhipicephalus pulchellus PE=2 SV=1|e=0|from=144|to=1667|frame=3|Fragment_2 - [Locus_5999_Transcript_1/1_Confidence_1.000_Length_2149|UNIGENE]	L7M0T0	Rhipicephalus pulchellus PE	30	26	31	40
transcript|tr|L7MFA2|L7MFA2_9ACAR Putative ca2+-binding actin-bundling protein (Fragment) OS=Rhipicephalus pulchellus PE=2 SV=1|e=5.0155E-45|from=1|to=276|frame=-2|Fragment_1 - [Locus_26151_Transcript_1/1_Confidence_1.000_Length_277|representative]	L7MFA2	Rhipicephalus pulchellus PE	28	34	26	41
transcript|tr|L7LYD3|L7LYD3_9ACAR Putative cgmp-dependent protein kinase 1 OS=Rhipicephalus pulchellus PE=2 SV=1|e=0|from=402|to=2144|frame=-1|Fragment_1 - [Locus_1184_Transcript_1/1_Confidence_1.000_Length_2153|representative]	L7LYD3	Rhipicephalus pulchellus PE	23	34	21	47
transcript|tr|L7M5T7|L7M5T7_9ACAR Uncharacterized protein OS=Rhipicephalus pulchellus PE=2 SV=1|e=0|from=2|to=1240|frame=2|Fragment_4 - [Locus_8818_Transcript_1/1_Confidence_1.000_Length_1244|representative]	L7M5T7	Rhipicephalus pulchellus PE	28	28	18	33
transcript|"tr|B7P1F2|B7P1F2_IXOSC Nhl repeat-containing protein, putative OS=Ixodes scapularis GN=IscW_ISCW000613 PE=4 SV=1"|e=7.38499E-33|from=4|to=261|frame=-2|Fragment_1 - [Locus_7476_Transcript_1/1_Confidence_1.000_Length_262|representative]	B7P1F2	Ixodes scapularis GN	29	40	22	36
representative transcript|tr|L7MDN5|L7MDN5_9ACAR Putative golgi apparatus protein cysteine-rich fibroblast growth factor receptor (Fragment) OS=Rhipicephalus pulchellus PE=2 SV=1|e=2.99523E-88|from=3|to=467|frame=3|Fragment_1 - [Locus_15509_Transcript_1/1	L7MDN5	Rhipicephalus pulchellus PE	24	46	16	33
representative transcript|tr|E4W3Z2|E4W3Z2_HAELO Heat shock 70 kDa protein 5 OS=Haemaphysalis longicornis PE=2 SV=1|e=0|from=722|to=2554|frame=-2|Fragment_1 - [Locus_1622_Transcript_1/1_Confidence_1.000_Length_2819|UNIGENE]	E4W3Z2	Haemaphysalis longicornis PE	29	22	20	30
transcript|tr|L7LY07|L7LY07_9ACAR Putative tick transposon OS=Rhipicephalus pulchellus PE=2 SV=1|e=9.82733E-17|from=3|to=314|frame=3|Fragment_1 - [Locus_5695_Transcript_1/1_Confidence_1.000_Length_334|representative]	L7LY07	Rhipicephalus pulchellus PE	19	24	12	31
Putative golgi apparatus protein cysteine-rich fibroblast growth factor receptor (Fragment) OS=Rhipicephalus pulchellus PE=2 SV=1|e=5.01221E-19|from=8|to=1057|frame=-2|Fragment_5 - [Locus_2578_Transcript_1/1_Confidence_1.000_Length_1058|.|tr|L7MDN5|L7MDN5	L7MDN5	Rhipicephalus pulchellus PE	22	39	0	34
transcript|tr|G3MLS3|G3MLS3_9ACAR Putative uncharacterized protein OS=Amblyomma maculatum PE=2 SV=1|e=0|from=1|to=1686|frame=1|Fragment_2 - [Locus_2170_Transcript_1/2_Confidence_0.750_Length_2082|representative]	G3MLS3	Amblyomma maculatum PE	57	78	56	37
representative transcript|tr|G3MT41|G3MT41_9ACAR ATP synthase subunit alpha OS=Amblyomma maculatum PE=2 SV=1|e=0|from=99|to=1757|frame=3|Fragment_2 - [Locus_9502_Transcript_1/1_Confidence_1.000_Length_1904|UNIGENE]	G3MT41	Amblyomma maculatum PE	55	73	51	47
representative transcript|tr|L7LZS3|L7LZS3_9ACAR Putative guanylate-binding protein OS=Rhipicephalus pulchellus PE=2 SV=1|e=5.96513E-40|from=348|to=671|frame=3|Fragment_1 - [Locus_9862_Transcript_1/1_Confidence_1.000_Length_673|UNIGENE]	L7LZS3	Rhipicephalus pulchellus PE	67	43	31	44
transcript|tr|L7M8E4|L7M8E4_9ACAR Uncharacterized protein OS=Rhipicephalus pulchellus PE=2 SV=1|e=0|from=2|to=2134|frame=2|Fragment_1 - [Locus_4315_Transcript_1/2_Confidence_0.667_Length_2202|representative]	L7M8E4	Rhipicephalus pulchellus PE	32	42	40	43
transcript|tr|L7M1E5|L7M1E5_9ACAR Uncharacterized protein OS=Rhipicephalus pulchellus PE=2 SV=1|e=0|from=3|to=1334|frame=3|Fragment_1 - [Locus_6713_Transcript_1/1_Confidence_1.000_Length_1335|representative]	L7M1E5	Rhipicephalus pulchellus PE	53	44	24	47
transcript|"tr|B7PR15|B7PR15_IXOSC Myosin IA, putative OS=Ixodes scapularis GN=IscW_ISCW018858 PE=4 SV=1"|e=6.55001E-54|from=249|to=671|frame=3|Fragment_2 - [Locus_2830_Transcript_2/3_Confidence_0.429_Length_3483|representative]	B7PR15	Ixodes scapularis GN	21	34	26	44
representative transcript|tr|L7M0U2|L7M0U2_9ACAR Putative myosin viia and rab OS=Rhipicephalus pulchellus PE=2 SV=1|e=0|from=38|to=3538|frame=2|Fragment_6 - [Locus_5824_Transcript_1/2_Confidence_0.750_Length_3539|UNIGENE]	L7M0U2	Rhipicephalus pulchellus PE	20	37	22	34
representative transcript|tr|L7M2K6|L7M2K6_9ACAR Putative cytochrome p450 family 3 subfamily protein a polypeptide 5 OS=Rhipicephalus pulchellus PE=2 SV=1|e=9.30948E-72|from=5|to=1270|frame=2|Fragment_3 - [Locus_9829_Transcript_3/3_Confidence_0.667_Length	L7M2K6	Rhipicephalus pulchellus PE	53	66	24	33
transcript|tr|L7MA51|L7MA51_9ACAR Uncharacterized protein (Fragment) OS=Rhipicephalus pulchellus PE=2 SV=1|e=6.69926E-79|from=429|to=1328|frame=3|Fragment_2 - [Locus_1974_Transcript_3/12_Confidence_0.556_Length_3062|representative]	L7MA51	Rhipicephalus pulchellus PE	19	48	27	56
representative transcript|tr|B7PCD2|B7PCD2_IXOSC Isocitrate dehydrogenase [NADP] OS=Ixodes scapularis GN=IscW_ISCW001977 PE=3 SV=1|e=0|from=119|to=1453|frame=2|Fragment_1 - [Locus_5018_Transcript_1/1_Confidence_1.000_Length_1529|UNIGENE]	B7PCD2	Ixodes scapularis GN	11	27	22	36
representative transcript|tr|B7Q381|B7Q381_IXOSC Putative uncharacterized protein OS=Ixodes scapularis GN=IscW_ISCW009032 PE=4 SV=1|e=0|from=6|to=5219|frame=3|Fragment_5 - [Locus_945_Transcript_10/14_Confidence_0.447_Length_5221|UNIGENE]	B7Q381	Ixodes scapularis GN	33	39	16	32
representative transcript|"tr|B7PGA6|B7PGA6_IXOSC Kettin, putative OS=Ixodes scapularis GN=IscW_ISCW017764 PE=4 SV=1"|e=5.72188E-88|from=2|to=493|frame=-3|Fragment_1 - [Locus_12942_Transcript_1/1_Confidence_1.000_Length_495|UNIGENE]	B7PGA6	Ixodes scapularis GN	16	30	3	41
representative transcript|tr|L7MH89|L7MH89_9ACAR Putative cullin 3a (Fragment) OS=Rhipicephalus pulchellus PE=2 SV=1|e=0|from=287|to=2632|frame=2|Fragment_2 - [Locus_2315_Transcript_1/2_Confidence_0.750_Length_3910|UNIGENE]	L7MH89	Rhipicephalus pulchellus PE	30	27	0	42
representative transcript|tr|G3MHF7|G3MHF7_9ACAR Putative uncharacterized protein (Fragment) OS=Amblyomma maculatum PE=2 SV=1|e=0|from=123|to=1268|frame=3|Fragment_1 - [Locus_201_Transcript_1/1_Confidence_1.000_Length_1458|UNIGENE]	G3MHF7	Amblyomma maculatum PE	20	30	30	33
transcript|tr|L7MBD6|L7MBD6_9ACAR Putative tick transposon (Fragment) OS=Rhipicephalus pulchellus PE=2 SV=1|e=7.18585E-60|from=1|to=354|frame=1|Fragment_1 - [Locus_9883_Transcript_1/1_Confidence_1.000_Length_356|representative]	L7MBD6	Rhipicephalus pulchellus PE	30	39	29	39
transcript|tr|L7LXD1|L7LXD1_9ACAR Putative phospholipid binding protein OS=Rhipicephalus pulchellus PE=2 SV=1|e=0|from=451|to=4230|frame=-1|Fragment_2 - [Locus_5568_Transcript_1/1_Confidence_1.000_Length_4230|representative]	L7LXD1	Rhipicephalus pulchellus PE	27	48	24	42
transcript|tr|G1UIC5|G1UIC5_9ARAC Complement component 3-1 OS=Hasarius adansoni GN=C3-1 PE=2 SV=1|e=7.5617E-24|from=3|to=377|frame=3|Fragment_1 - [Locus_18375_Transcript_1/1_Confidence_1.000_Length_388|representative]	G1UIC5	Hasarius adansoni GN	32	65	29	38
transcript|tr|L7MD00|L7MD00_9ACAR Uncharacterized protein (Fragment) OS=Rhipicephalus pulchellus PE=2 SV=1|e=0|from=38|to=2635|frame=2|Fragment_1 - [Locus_416_Transcript_1/2_Confidence_0.750_Length_2687|representative]	L7MD00	Rhipicephalus pulchellus PE	37	43	33	33
transcript|tr|L7LRQ3|L7LRQ3_9ACAR Putative rna polymerase i large subunit OS=Rhipicephalus pulchellus PE=2 SV=1|e=7.55337E-86|from=2|to=448|frame=2|Fragment_1 - [Locus_22894_Transcript_1/1_Confidence_1.000_Length_450|representative]	L7LRQ3	Rhipicephalus pulchellus PE	36	52	29	42
representative transcript|"tr|B7PM12|B7PM12_IXOSC Dynamin, putative OS=Ixodes scapularis GN=IscW_ISCW005274 PE=3 SV=1"|e=0|from=2|to=2356|frame=-3|Fragment_1 - [Locus_8788_Transcript_1/1_Confidence_1.000_Length_2499|UNIGENE]	B7PM12	Ixodes scapularis GN	23	41	17	31
representative transcript|tr|L7LY00|L7LY00_9ACAR Putative dnaj log subfamily protein c member 7 OS=Rhipicephalus pulchellus PE=2 SV=1|e=0|from=110|to=1558|frame=2|Fragment_1 - [Locus_4305_Transcript_1/1_Confidence_1.000_Length_1866|UNIGENE]	L7LY00	Rhipicephalus pulchellus PE	42	26	19	30
representative transcript|"tr|B7P9E4|B7P9E4_IXOSC Na+/K+ ATPase, alpha subunit, putative (Fragment) OS=Ixodes scapularis GN=IscW_ISCW002538 PE=3 SV=1"|e=0|from=151|to=3249|frame=1|Fragment_3 - [Locus_9530_Transcript_1/1_Confidence_1.000_Length_3453|UNIGEN	B7P9E4	Ixodes scapularis GN	31	45	19	32
transcript|"tr|B7QB61|B7QB61_IXOSC Pre-mRNA splicing factor Prp8, putative OS=Ixodes scapularis GN=IscW_ISCW022487 PE=4 SV=1"|e=9.7928E-154|from=3|to=764|frame=3|Fragment_1 - [Locus_12489_Transcript_1/1_Confidence_1.000_Length_764|representative]	B7QB61	Ixodes scapularis GN	32	38	20	40
transcript|tr|G3MK86|G3MK86_9ACAR Putative uncharacterized protein OS=Amblyomma maculatum PE=2 SV=1|e=0|from=1|to=2025|frame=1|Fragment_1 - [Locus_9041_Transcript_1/1_Confidence_1.000_Length_2097|representative]	G3MK86	Amblyomma maculatum PE	43	41	31	55
transcript|"tr|B7PUB2|B7PUB2_IXOSC Ornithine decarboxylase, putative (Fragment) OS=Ixodes scapularis GN=IscW_ISCW006933 PE=3 SV=1"|e=8.16202E-27|from=3|to=257|frame=-3|Fragment_1 - [Locus_24547_Transcript_1/1_Confidence_1.000_Length_406|representative]	B7PUB2	Ixodes scapularis GN	32	20	17	38
representative transcript|tr|L7LXK1|L7LXK1_9ACAR Putative translation initiation factor 3 subunit s8 protein OS=Rhipicephalus pulchellus PE=2 SV=1|e=0|from=86|to=2851|frame=2|Fragment_7 - [Locus_3673_Transcript_1/2_Confidence_0.750_Length_2953|UNIGENE]	L7LXK1	Rhipicephalus pulchellus PE	35	48	24	46
transcript|tr|L7MJB7|L7MJB7_9ACAR Putative phosphatidylinositol 3-phosphate 3-phosphatase myotubularin mtm1 (Fragment) OS=Rhipicephalus pulchellus PE=2 SV=1|e=2.5431E-172|from=2|to=874|frame=-2|Fragment_1 - [Locus_17845_Transcript_1/1_Confidence_1.000_Len	L7MJB7	Rhipicephalus pulchellus PE	38	26	12	41
representative transcript|tr|L7LUZ0|L7LUZ0_9ACAR Putative transforming growth factor-beta-induced protein ig-h3 OS=Rhipicephalus pulchellus PE=2 SV=1|e=0|from=35|to=1255|frame=2|Fragment_7 - [Locus_5614_Transcript_2/3_Confidence_0.714_Length_1255|UNIGENE]	L7LUZ0	Rhipicephalus pulchellus PE	24	12	4	30
representative transcript|tr|L7MEV5|L7MEV5_9ACAR Putative guanine nucleotide exchange factor (Fragment) OS=Rhipicephalus pulchellus PE=2 SV=1|e=8.74297E-42|from=3|to=449|frame=3|Fragment_5 - [Locus_1459_Transcript_1/3_Confidence_0.286_Length_449|UNIGENE]	L7MEV5	Rhipicephalus pulchellus PE	18	25	0	42
representative transcript|tr|L7M755|L7M755_9ACAR Putative nadh-ubiquinone oxidoreductase ndufs1/75 kDa subunit OS=Rhipicephalus pulchellus PE=2 SV=1|e=0|from=53|to=2257|frame=2|Fragment_1 - [Locus_1250_Transcript_1/1_Confidence_1.000_Length_2330|UNIGENE]	L7M755	Rhipicephalus pulchellus PE	25	27	28	23
representative transcript|tr|L7M7D5|L7M7D5_9ACAR Putative bre1 OS=Rhipicephalus pulchellus PE=2 SV=1|e=0|from=1312|to=4023|frame=1|Fragment_9 - [Locus_1572_Transcript_1/1_Confidence_1.000_Length_4199|UNIGENE]	L7M7D5	Rhipicephalus pulchellus PE	45	69	30	68
representative transcript|tr|G3MPN1|G3MPN1_9ACAR Putative uncharacterized protein OS=Amblyomma maculatum PE=2 SV=1|e=7.7669E-169|from=156|to=1106|frame=3|Fragment_1 - [Locus_4273_Transcript_1/1_Confidence_1.000_Length_1321|UNIGENE]	G3MPN1	Amblyomma maculatum PE	20	35	27	31
transcript|tr|L7MM55|L7MM55_9ACAR Putative glutathione synthetase (Fragment) OS=Rhipicephalus pulchellus PE=2 SV=1|e=0|from=69|to=1601|frame=3|Fragment_1 - [Locus_5831_Transcript_2/4_Confidence_0.625_Length_1778|representative]	L7MM55	Rhipicephalus pulchellus PE	29	33	27	34
representative transcript|"tr|B7PLA6|B7PLA6_IXOSC Translation elongation factor EF-1 alpha/Tu, putative OS=Ixodes scapularis GN=IscW_ISCW018746 PE=4 SV=1"|e=0|from=196|to=1884|frame=1|Fragment_3 - [Locus_6000_Transcript_1/1_Confidence_1.000_Length_1986|UN	B7PLA6	Ixodes scapularis GN	25	32	22	41
representative transcript|tr|L7M609|L7M609_9ACAR Putative atp-dependent lon protease atp-dependent lon protease OS=Rhipicephalus pulchellus PE=2 SV=1|e=1.56288E-60|from=2|to=415|frame=2|Fragment_1 - [Locus_11685_Transcript_1/1_Confidence_1.000_Length_417|	L7M609	Rhipicephalus pulchellus PE	20	34	17	26
transcript|tr|L7M250|L7M250_9ACAR Putative mannose-6-phosphate/insulin receptor type ii OS=Rhipicephalus pulchellus PE=2 SV=1|e=7.9658E-70|from=3|to=407|frame=3|Fragment_1 - [Locus_12164_Transcript_1/1_Confidence_1.000_Length_409|representative]	L7M250	Rhipicephalus pulchellus PE	23	26	15	33
representative transcript|tr|L7M777|L7M777_9ACAR Uncharacterized protein OS=Rhipicephalus pulchellus PE=2 SV=1|e=0|from=41|to=2176|frame=-3|Fragment_1 - [Locus_9780_Transcript_1/1_Confidence_1.000_Length_2196|UNIGENE]	L7M777	Rhipicephalus pulchellus PE	0	27	15	23
transcript|tr|L7M3G6|L7M3G6_9ACAR Putative vacuolar assembly/sorting protein vps41 OS=Rhipicephalus pulchellus PE=2 SV=1|e=0|from=333|to=2831|frame=3|Fragment_1 - [Locus_6965_Transcript_1/1_Confidence_1.000_Length_3002|representative]	L7M3G6	Rhipicephalus pulchellus PE	22	39	19	30
transcript|tr|G9M4L6|G9M4L6_HAELO Vitellogenin-B OS=Haemaphysalis longicornis GN=HlVg-B PE=2 SV=1|e=5.60221E-36|from=2|to=271|frame=-3|Fragment_1 - [Locus_14401_Transcript_1/1_Confidence_1.000_Length_273|representative]	G9M4L6	Haemaphysalis longicornis GN	16	27	19	32
representative transcript|tr|L7M2M5|L7M2M5_9ACAR Putative wd40 domain protein OS=Rhipicephalus pulchellus PE=2 SV=1|e=0|from=265|to=1908|frame=1|Fragment_1 - [Locus_7991_Transcript_1/1_Confidence_1.000_Length_1996|UNIGENE]	L7M2M5	Rhipicephalus pulchellus PE	20	0	0	26
representative transcript|tr|B7QLF1|B7QLF1_IXOSC Putative uncharacterized protein (Fragment) OS=Ixodes scapularis GN=IscW_ISCW023694 PE=4 SV=1|e=6.5594E-129|from=3|to=1136|frame=3|Fragment_2 - [Locus_5558_Transcript_1/1_Confidence_1.000_Length_1146|UNIGEN	B7QLF1	Ixodes scapularis GN	37	16	50	38
transcript|tr|L7M7S0|L7M7S0_9ACAR Putative carnitine palmitoyltransferase ii OS=Rhipicephalus pulchellus PE=2 SV=1|e=0|from=2|to=1810|frame=-3|Fragment_2 - [Locus_1739_Transcript_4/5_Confidence_0.615_Length_2211|representative]	L7M7S0	Rhipicephalus pulchellus PE	51	21	33	53
transcript|tr|L7MJB4|L7MJB4_9ACAR Putative draper (Fragment) OS=Rhipicephalus pulchellus PE=2 SV=1|e=0|from=601|to=3516|frame=1|Fragment_1 - [Locus_2027_Transcript_1/8_Confidence_0.619_Length_4696|representative]	L7MJB4	Rhipicephalus pulchellus PE	35	47	34	46
representative transcript|tr|L7MJU0|L7MJU0_9ACAR Putative phosphatidylinositol-45-bisphosphate 3-kinase catalytic subunit alpha isoform (Fragment) OS=Rhipicephalus pulchellus PE=2 SV=1|e=7.64656E-62|from=2|to=334|frame=-2|Fragment_1 - [Locus_18928_Transcr	L7MJU0	Rhipicephalus pulchellus PE	5	32	21	44
transcript|tr|L7M2A4|L7M2A4_9ACAR Putative alpha actinin OS=Rhipicephalus pulchellus PE=2 SV=1|e=3.7704E-112|from=424|to=1038|frame=1|Fragment_2 - [Locus_2947_Transcript_1/4_Confidence_0.667_Length_1038|representative]	L7M2A4	Rhipicephalus pulchellus PE	26	32	20	27
transcript|tr|L7MM31|L7MM31_9ACAR Putative 5'-phosphoribosylglycinamide formyltransferase (Fragment) OS=Rhipicephalus pulchellus PE=2 SV=1|e=0|from=1|to=2295|frame=1|Fragment_1 - [Locus_2677_Transcript_1/2_Confidence_0.750_Length_2370|representative]	L7MM31	Rhipicephalus pulchellus PE	21	28	20	29
representative transcript|tr|L7MLK7|L7MLK7_9ACAR Putative alkaline phosphatase protein (Fragment) OS=Rhipicephalus pulchellus PE=2 SV=1|e=3.476E-170|from=620|to=2071|frame=2|Fragment_1 - [Locus_3017_Transcript_1/2_Confidence_0.667_Length_2270|UNIGENE]	L7MLK7	Rhipicephalus pulchellus PE	25	29	18	25
representative transcript|tr|G3MLT4|G3MLT4_9ACAR Putative uncharacterized protein OS=Amblyomma maculatum PE=2 SV=1|e=1.3099E-133|from=218|to=970|frame=2|Fragment_1 - [Locus_3163_Transcript_1/1_Confidence_1.000_Length_1266|UNIGENE]	G3MLT4	Amblyomma maculatum PE	14	24	14	32
representative transcript|tr|L7M6N2|L7M6N2_9ACAR Putative succinate dehydrogenase flavoprotein subunit OS=Rhipicephalus pulchellus PE=2 SV=1|e=0|from=2|to=1903|frame=2|Fragment_2 - [Locus_1827_Transcript_2/3_Confidence_0.714_Length_2244|UNIGENE]	L7M6N2	Rhipicephalus pulchellus PE	20	11	17	21
transcript|tr|L7LX84|L7LX84_9ACAR Putative tank binding protein kinase tbk1 OS=Rhipicephalus pulchellus PE=2 SV=1|e=6.99855E-47|from=2|to=277|frame=2|Fragment_1 - [Locus_18022_Transcript_1/1_Confidence_1.000_Length_278|representative]	L7LX84	Rhipicephalus pulchellus PE	32	32	18	35
transcript|sp|P83606|BMTI6_BOOMI Kunitz-type serine protease inhibitor 6 (Fragment) OS=Boophilus microplus PE=1 SV=2|e=5.7389E-107|from=1289|to=1867|frame=-3|Fragment_1 - [Locus_309_Transcript_2/8_Confidence_0.524_Length_1869|representative]	P83606	Boophilus microplus PE	24	39	9	23
representative transcript|tr|L7MA07|L7MA07_9ACAR Putative signal recognition particle subunit srp72 OS=Rhipicephalus pulchellus PE=2 SV=1|e=0|from=178|to=2049|frame=-2|Fragment_4 - [Locus_9220_Transcript_1/1_Confidence_1.000_Length_2149|UNIGENE]	L7MA07	Rhipicephalus pulchellus PE	13	8	7	22
Putative prolow-density lipoprotein receptor-related protein 1 (Fragment) OS=Rhipicephalus pulchellus PE=2 SV=1|e=7.56646E-29|from=5|to=481|frame=2|Fragment_1 - [Locus_20538_Transcript_1/1_Confidence_1.000_Length_483|.|tr|L7MIA7|L7MIA7_9ACAR]	L7MIA7	Rhipicephalus pulchellus PE	24	32	11	45
representative transcript|tr|L7M333|L7M333_9ACAR Uncharacterized protein OS=Rhipicephalus pulchellus PE=2 SV=1|e=2.19411E-92|from=1963|to=4104|frame=-1|Fragment_9 - [Locus_332_Transcript_3/3_Confidence_0.571_Length_4713|UNIGENE]	L7M333	Rhipicephalus pulchellus PE	47	33	32	35
representative transcript|tr|L7MII0|L7MII0_9ACAR Putative dolichyl-diphosphooligosaccharide--protein glycosyltransferase subunit 2 (Fragment) OS=Rhipicephalus pulchellus PE=2 SV=1|e=0|from=78|to=2018|frame=3|Fragment_4 - [Locus_527_Transcript_1/1_Confiden	L7MII0	Rhipicephalus pulchellus PE	29	38	31	29
representative transcript|tr|L7MDE2|L7MDE2_9ACAR Uncharacterized protein (Fragment) OS=Rhipicephalus pulchellus PE=2 SV=1|e=1.5245E-118|from=2|to=835|frame=-3|Fragment_2 - [Locus_1581_Transcript_1/2_Confidence_0.750_Length_837|UNIGENE]	L7MDE2	Rhipicephalus pulchellus PE	32	42	28	32
representative transcript|tr|L7LVT2|L7LVT2_9ACAR Putative nuclear helicase mop-3/sno dead-box superfamily OS=Rhipicephalus pulchellus PE=2 SV=1|e=0|from=1|to=1995|frame=1|Fragment_5 - [Locus_7884_Transcript_1/2_Confidence_0.750_Length_3290|UNIGENE]	L7LVT2	Rhipicephalus pulchellus PE	28	22	25	27
representative transcript|tr|L7MHB4|L7MHB4_9ACAR Putative atp-citrate lyase (Fragment) OS=Rhipicephalus pulchellus PE=2 SV=1|e=0|from=154|to=3414|frame=1|Fragment_2 - [Locus_3235_Transcript_1/1_Confidence_1.000_Length_4006|UNIGENE]	L7MHB4	Rhipicephalus pulchellus PE	15	0	21	26
representative transcript|"tr|B7PAR6|B7PAR6_IXOSC Heat shock protein, putative OS=Ixodes scapularis GN=IscW_ISCW017456 PE=3 SV=1"|e=3.4787E-154|from=126|to=1151|frame=-1|Fragment_1 - [Locus_64_Transcript_1/4_Confidence_0.700_Length_1151|UNIGENE]	B7PAR6	Ixodes scapularis GN	27	36	20	29
representative transcript|tr|L7LYQ2|L7LYQ2_9ACAR Uncharacterized protein OS=Rhipicephalus pulchellus PE=2 SV=1|e=1.1987E-158|from=1|to=786|frame=1|Fragment_1 - [Locus_10933_Transcript_1/1_Confidence_1.000_Length_856|UNIGENE]	L7LYQ2	Rhipicephalus pulchellus PE	25	24	24	39
representative transcript|tr|L7LWZ3|L7LWZ3_9ACAR Putative actin cytoskeleton organization OS=Rhipicephalus pulchellus PE=2 SV=1|e=0|from=1582|to=3021|frame=-2|Fragment_2 - [Locus_3966_Transcript_1/1_Confidence_1.000_Length_3022|UNIGENE]	L7LWZ3	Rhipicephalus pulchellus PE	30	33	16	23
representative transcript|tr|L7M3Q1|L7M3Q1_9ACAR Putative vesicle trafficking protein sec1 OS=Rhipicephalus pulchellus PE=2 SV=1|e=0|from=20|to=1783|frame=2|Fragment_1 - [Locus_4933_Transcript_1/1_Confidence_1.000_Length_2808|UNIGENE]	L7M3Q1	Rhipicephalus pulchellus PE	33	45	18	34
transcript|"tr|B7P3Q1|B7P3Q1_IXOSC DEAD box protein abstrakt, putative OS=Ixodes scapularis GN=IscW_ISCW016533 PE=4 SV=1"|e=0|from=168|to=1859|frame=-3|Fragment_3 - [Locus_11613_Transcript_1/1_Confidence_1.000_Length_2065|representative]	B7P3Q1	Ixodes scapularis GN	34	28	23	45
transcript|tr|L7M2N7|L7M2N7_9ACAR Putative brefeldin a-inhibited guanine nucleotide-exchange protein 1 OS=Rhipicephalus pulchellus PE=2 SV=1|e=8.04923E-75|from=1|to=402|frame=1|Fragment_1 - [Locus_3551_Transcript_1/1_Confidence_1.000_Length_404|representa	L7M2N7	Rhipicephalus pulchellus PE	36	50	13	34
representative transcript|tr|L7M4C7|L7M4C7_9ACAR Putative cell growth-regulating nucleolar protein OS=Rhipicephalus pulchellus PE=2 SV=1|e=1.3029E-48|from=12|to=581|frame=-1|Fragment_4 - [Locus_2660_Transcript_1/1_Confidence_1.000_Length_602|UNIGENE]	L7M4C7	Rhipicephalus pulchellus PE	27	39	17	52
transcript|tr|L7LZB8|L7LZB8_9ACAR Putative short transient receptor potential channel 4-associated protein OS=Rhipicephalus pulchellus PE=2 SV=1|e=8.81743E-26|from=3|to=161|frame=3|Fragment_1 - [Locus_16969_Transcript_1/1_Confidence_1.000_Length_313|repre	L7LZB8	Rhipicephalus pulchellus PE	17	18	9	25
representative transcript|tr|L7MBC4|L7MBC4_9ACAR Putative tick salivary antigen-5 protein OS=Rhipicephalus pulchellus PE=2 SV=1|e=1.3404E-153|from=2|to=1309|frame=-1|Fragment_3 - [Locus_2505_Transcript_1/2_Confidence_0.667_Length_1441|UNIGENE]	L7MBC4	Rhipicephalus pulchellus PE	17	12	16	33
representative transcript|tr|L7LVX7|L7LVX7_9ACAR Putative cysteinyl-trna synthetase OS=Rhipicephalus pulchellus PE=2 SV=1|e=0|from=471|to=1904|frame=-3|Fragment_1 - [Locus_4565_Transcript_1/4_Confidence_0.700_Length_1906|UNIGENE]	L7LVX7	Rhipicephalus pulchellus PE	19	17	10	29
representative transcript|tr|L7M827|L7M827_9ACAR Putative h/aca ribonucleoprotein complex subunit 4 OS=Rhipicephalus pulchellus PE=2 SV=1|e=0|from=145|to=1452|frame=-1|Fragment_2 - [Locus_1628_Transcript_1/1_Confidence_1.000_Length_1503|UNIGENE]	L7M827	Rhipicephalus pulchellus PE	15	11	0	23
transcript|tr|L7M3T9|L7M3T9_9ACAR Putative 39s ribosomal protein l47 mitochondrial OS=Rhipicephalus pulchellus PE=2 SV=1|e=2.61636E-30|from=61|to=264|frame=1|Fragment_1 - [Locus_24437_Transcript_1/1_Confidence_1.000_Length_264|representative]	L7M3T9	Rhipicephalus pulchellus PE	22	59	32	49
transcript|tr|L7M575|L7M575_9ACAR Putative flotillin OS=Rhipicephalus pulchellus PE=2 SV=1|e=0|from=1432|to=2715|frame=-1|Fragment_2 - [Locus_19415_Transcript_1/1_Confidence_1.000_Length_2844|representative]	L7M575	Rhipicephalus pulchellus PE	15	41	31	28
Putative uncharacterized protein (Fragment) OS=Ixodes scapularis GN=IscW_ISCW023694 PE=4 SV=1|e=6.05097E-14|from=38|to=541|frame=2|Fragment_4 - [Locus_11528_Transcript_1/1_Confidence_1.000_Length_598|.|tr|B7QLF1|B7QLF1_IXOSC]	B7QLF1	Ixodes scapularis GN	9	27	24	23
transcript|tr|L7MF25|L7MF25_9ACAR Putative rna polymer (Fragment) OS=Rhipicephalus pulchellus PE=2 SV=1|e=0|from=179|to=2470|frame=2|Fragment_3 - [Locus_4790_Transcript_1/3_Confidence_0.714_Length_2798|representative]	L7MF25	Rhipicephalus pulchellus PE	29	30	30	28
transcript|tr|L7LTC4|L7LTC4_9ACAR Uncharacterized protein OS=Rhipicephalus pulchellus PE=2 SV=1|e=5.3079E-163|from=804|to=1775|frame=-1|Fragment_2 - [Locus_8230_Transcript_1/1_Confidence_1.000_Length_1775|representative]	L7LTC4	Rhipicephalus pulchellus PE	21	19	22	24
transcript|tr|L7M7F5|L7M7F5_9ACAR Putative sec5 subunit of exocyst complex OS=Rhipicephalus pulchellus PE=2 SV=1|e=0|from=190|to=2757|frame=1|Fragment_2 - [Locus_6536_Transcript_1/1_Confidence_1.000_Length_2896|representative]	L7M7F5	Rhipicephalus pulchellus PE	32	33	20	22
representative transcript|tr|L7LY36|L7LY36_9ACAR Putative fructose-6-phosphate OS=Rhipicephalus pulchellus PE=2 SV=1|e=0|from=2|to=1417|frame=2|Fragment_1 - [Locus_361_Transcript_1/6_Confidence_0.625_Length_7040|UNIGENE]	L7LY36	Rhipicephalus pulchellus PE	20	30	19	24
representative transcript|tr|L7LWZ7|L7LWZ7_9ACAR Putative maternal expression at 31b OS=Rhipicephalus pulchellus PE=2 SV=1|e=0|from=313|to=1638|frame=-1|Fragment_1 - [Locus_781_Transcript_1/1_Confidence_1.000_Length_1803|UNIGENE]	L7LWZ7	Rhipicephalus pulchellus PE	0	28	21	33
representative transcript|tr|L7M6M3|L7M6M3_9ACAR Putative leucyl-trna synthetase OS=Rhipicephalus pulchellus PE=2 SV=1|e=3.57666E-65|from=3|to=374|frame=3|Fragment_1 - [Locus_2471_Transcript_1/1_Confidence_1.000_Length_374|UNIGENE]	L7M6M3	Rhipicephalus pulchellus PE	24	35	20	33
representative transcript|tr|L7LR37|L7LR37_9ACAR Putative tick transposon OS=Rhipicephalus pulchellus PE=2 SV=1|e=9.34945E-36|from=858|to=1235|frame=3|Fragment_1 - [Locus_8008_Transcript_1/3_Confidence_0.714_Length_1235|UNIGENE]	L7LR37	Rhipicephalus pulchellus PE	20	18	20	24
transcript|tr|L7MLM6|L7MLM6_9ACAR Putative m13 family peptidase (Fragment) OS=Rhipicephalus pulchellus PE=2 SV=1|e=0|from=110|to=2302|frame=-2|Fragment_1 - [Locus_60_Transcript_1/1_Confidence_1.000_Length_2774|representative]	L7MLM6	Rhipicephalus pulchellus PE	18	31	24	29
representative transcript|"tr|B7PW45|B7PW45_IXOSC Acyl-CoA synthetase, putative OS=Ixodes scapularis GN=IscW_ISCW007238 PE=4 SV=1"|e=9.72375E-74|from=14|to=1591|frame=-1|Fragment_1 - [Locus_284_Transcript_3/5_Confidence_0.583_Length_1687|UNIGENE]	B7PW45	Ixodes scapularis GN	18	37	15	25
representative transcript|tr|L7LUB8|L7LUB8_9ACAR Putative threonyl-trna synthetase OS=Rhipicephalus pulchellus PE=2 SV=1|e=0|from=290|to=2413|frame=-3|Fragment_2 - [Locus_2102_Transcript_1/1_Confidence_1.000_Length_2532|UNIGENE]	L7LUB8	Rhipicephalus pulchellus PE	38	40	19	40
transcript|tr|G3MGV9|G3MGV9_9ACAR Putative uncharacterized protein (Fragment) OS=Amblyomma maculatum PE=2 SV=1|e=0|from=3|to=1547|frame=3|Fragment_1 - [Locus_2570_Transcript_2/7_Confidence_0.562_Length_2680|representative]	G3MGV9	Amblyomma maculatum PE	23	30	16	28
transcript|tr|B7Q349|B7Q349_IXOSC Elongation factor 1-alpha OS=Ixodes scapularis GN=IscW_ISCW020299 PE=3 SV=1|e=0|from=270|to=1583|frame=-2|Fragment_1 - [Locus_13_Transcript_1/1_Confidence_1.000_Length_1584|representative]	B7Q349	Ixodes scapularis GN	25	26	25	34
representative transcript|tr|L7M7B2|L7M7B2_9ACAR Putative metalloexopeptidase OS=Rhipicephalus pulchellus PE=2 SV=1|e=0|from=173|to=1615|frame=2|Fragment_1 - [Locus_1457_Transcript_1/1_Confidence_1.000_Length_1940|UNIGENE]	L7M7B2	Rhipicephalus pulchellus PE	24	36	17	58
representative transcript|tr|L7M302|L7M302_9ACAR Putative four and a half lim protein 2 OS=Rhipicephalus pulchellus PE=2 SV=1|e=0|from=360|to=1253|frame=3|Fragment_1 - [Locus_1131_Transcript_2/7_Confidence_0.647_Length_3884|UNIGENE]	L7M302	Rhipicephalus pulchellus PE	14	20	19	32
representative transcript|tr|L7M8R2|L7M8R2_9ACAR Putative tick thioester protein OS=Rhipicephalus pulchellus PE=2 SV=1|e=0|from=77|to=3565|frame=2|Fragment_3 - [Locus_1181_Transcript_1/5_Confidence_0.692_Length_3567|UNIGENE]	L7M8R2	Rhipicephalus pulchellus PE	34	32	14	27
representative transcript|tr|G3MST0|G3MST0_9ACAR Putative uncharacterized protein OS=Amblyomma maculatum PE=2 SV=1|e=7.937E-133|from=248|to=1423|frame=-1|Fragment_2 - [Locus_2096_Transcript_1/1_Confidence_1.000_Length_1864|UNIGENE]	G3MST0	Amblyomma maculatum PE	20	19	22	26
transcript|tr|L7LVG6|L7LVG6_9ACAR Putative glycine rich protein OS=Rhipicephalus pulchellus PE=2 SV=1|e=3.03525E-49|from=65|to=388|frame=2|Fragment_2 - [Locus_4561_Transcript_1/1_Confidence_1.000_Length_390|representative]	L7LVG6	Rhipicephalus pulchellus PE	16	23	14	25
transcript|tr|L7M1Y9|L7M1Y9_9ACAR Putative myosin class ii heavy chain OS=Rhipicephalus pulchellus PE=2 SV=1|e=8.4019E-64|from=3|to=455|frame=3|Fragment_1 - [Locus_15720_Transcript_1/1_Confidence_1.000_Length_455|representative]	L7M1Y9	Rhipicephalus pulchellus PE	26	28	18	35
representative transcript|tr|A7BFI9|A7BFI9_HAELO Valosin containing protein OS=Haemaphysalis longicornis GN=VCP PE=3 SV=1|e=0|from=116|to=2512|frame=2|Fragment_4 - [Locus_765_Transcript_1/2_Confidence_0.750_Length_2679|UNIGENE]	A7BFI9	Haemaphysalis longicornis GN	0	21	12	23
transcript|sp|Q4PMB3|RS4_IXOSC 40S ribosomal protein S4 OS=Ixodes scapularis GN=RpS4 PE=2 SV=1|e=1.1907E-148|from=60|to=845|frame=3|Fragment_1 - [Locus_1070_Transcript_1/1_Confidence_1.000_Length_891|representative]	Q4PMB3	Ixodes scapularis GN	21	0	12	30
transcript|tr|L7LUL9|L7LUL9_9ACAR Putative rab gtpase-activating protein 1 OS=Rhipicephalus pulchellus PE=2 SV=1|e=3.4642E-103|from=232|to=903|frame=1|Fragment_3 - [Locus_9819_Transcript_1/1_Confidence_1.000_Length_908|representative]	L7LUL9	Rhipicephalus pulchellus PE	47	33	13	49
Putative uncharacterized protein OS=Amblyomma maculatum PE=2 SV=1|e=8.21256E-93|from=71|to=124|frame=2|Fragment_1 - [Locus_1071_Transcript_1/3_Confidence_0.500_Length_932|.|tr|G3MPQ7|G3MPQ7_9ACAR]	G3MPQ7	Amblyomma maculatum PE	16	30	13	37
representative transcript|tr|L7M7H7|L7M7H7_9ACAR Putative amino acid transporter OS=Rhipicephalus pulchellus PE=2 SV=1|e=0|from=178|to=1983|frame=1|Fragment_1 - [Locus_812_Transcript_4/5_Confidence_0.538_Length_2605|UNIGENE]	L7M7H7	Rhipicephalus pulchellus PE	15	32	9	21
representative transcript|tr|L7LWV8|L7LWV8_9ACAR Putative fast kinase domain-containing protein 2 OS=Rhipicephalus pulchellus PE=2 SV=1|e=4.78891E-15|from=1716|to=1829|frame=-2|Fragment_1 - [Locus_3400_Transcript_2/2_Confidence_0.667_Length_2211|UNIGENE]	L7LWV8	Rhipicephalus pulchellus PE	12	20	8	26
representative transcript|tr|L7MAF8|L7MAF8_9ACAR Uncharacterized protein OS=Rhipicephalus pulchellus PE=2 SV=1|e=0|from=6|to=1511|frame=3|Fragment_2 - [Locus_298_Transcript_2/3_Confidence_0.667_Length_1617|UNIGENE]	L7MAF8	Rhipicephalus pulchellus PE	0	33	8	37
representative transcript|tr|L7LYX3|L7LYX3_9ACAR Putative vesicle coat complex copii subunit sec23 OS=Rhipicephalus pulchellus PE=2 SV=1|e=0|from=990|to=2291|frame=-3|Fragment_1 - [Locus_1199_Transcript_1/3_Confidence_0.600_Length_2293|UNIGENE]	L7LYX3	Rhipicephalus pulchellus PE	23	29	0	22
transcript|"tr|B7Q6Y2|B7Q6Y2_IXOSC Chaperonin subunit, putative OS=Ixodes scapularis GN=IscW_ISCW011431 PE=3 SV=1"|e=0|from=130|to=1752|frame=1|Fragment_2 - [Locus_2725_Transcript_2/2_Confidence_0.750_Length_1836|representative]	B7Q6Y2	Ixodes scapularis GN	20	23	0	28
representative transcript|tr|L7M9S3|L7M9S3_9ACAR Uncharacterized protein OS=Rhipicephalus pulchellus PE=2 SV=1|e=0|from=85|to=2274|frame=-2|Fragment_2 - [Locus_5031_Transcript_1/5_Confidence_0.667_Length_2482|UNIGENE]	L7M9S3	Rhipicephalus pulchellus PE	21	24	0	27
representative transcript|"tr|B7QAW7|B7QAW7_IXOSC Ubiquitination factor E4a, putative OS=Ixodes scapularis GN=IscW_ISCW012014 PE=4 SV=1"|e=2.996E-141|from=3|to=1049|frame=3|Fragment_3 - [Locus_7188_Transcript_2/5_Confidence_0.167_Length_1051|UNIGENE]	B7QAW7	Ixodes scapularis GN	16	18	0	28
representative transcript|tr|G3MNH6|G3MNH6_9ACAR Putative uncharacterized protein OS=Amblyomma maculatum PE=2 SV=1|e=0|from=87|to=2012|frame=3|Fragment_1 - [Locus_2064_Transcript_1/4_Confidence_0.700_Length_3617|UNIGENE]	G3MNH6	Amblyomma maculatum PE	29	33	28	24
representative transcript|tr|L7M625|L7M625_9ACAR Putative dna topoisomerase i OS=Rhipicephalus pulchellus PE=2 SV=1|e=0|from=2236|to=4443|frame=-3|Fragment_7 - [Locus_897_Transcript_1/1_Confidence_1.000_Length_5228|UNIGENE]	L7M625	Rhipicephalus pulchellus PE	28	21	23	24
representative transcript|tr|L7MKU5|L7MKU5_9ACAR Putative histidyl-trna synthetase (Fragment) OS=Rhipicephalus pulchellus PE=2 SV=1|e=0|from=47|to=1567|frame=-3|Fragment_1 - [Locus_5098_Transcript_1/5_Confidence_0.692_Length_1635|UNIGENE]	L7MKU5	Rhipicephalus pulchellus PE	32	39	24	24
representative transcript|tr|L7M8C7|L7M8C7_9ACAR Putative 3-phosphoglycerate kinase OS=Rhipicephalus pulchellus PE=2 SV=1|e=0|from=68|to=1315|frame=-1|Fragment_2 - [Locus_2928_Transcript_1/2_Confidence_0.750_Length_1459|UNIGENE]	L7M8C7	Rhipicephalus pulchellus PE	16	24	24	24
representative transcript|tr|L7M2J7|L7M2J7_9ACAR Putative cytochrome OS=Rhipicephalus pulchellus PE=2 SV=1|e=1.1486E-61|from=4|to=417|frame=1|Fragment_1 - [Locus_13393_Transcript_1/1_Confidence_1.000_Length_425|UNIGENE]	L7M2J7	Rhipicephalus pulchellus PE	25	34	23	28
representative transcript|tr|G3MNS8|G3MNS8_9ACAR Putative uncharacterized protein OS=Amblyomma maculatum PE=2 SV=1|e=0|from=11|to=1417|frame=-3|Fragment_1 - [Locus_2177_Transcript_1/4_Confidence_0.625_Length_1419|UNIGENE]	G3MNS8	Amblyomma maculatum PE	31	25	25	27
representative transcript|tr|L7MBH4|L7MBH4_9ACAR Putative mechanistic target of rapamycin serine/threonine kinase (Fragment) OS=Rhipicephalus pulchellus PE=2 SV=1|e=0|from=3|to=1631|frame=3|Fragment_2 - [Locus_5594_Transcript_1/1_Confidence_1.000_Length_1	L7MBH4	Rhipicephalus pulchellus PE	33	40	22	41
Putative draper (Fragment) OS=Rhipicephalus pulchellus PE=2 SV=1|e=2.75977E-77|from=11|to=802|frame=2|Fragment_1 - [Locus_7405_Transcript_2/2_Confidence_0.667_Length_804|.|tr|L7MJB4|L7MJB4_9ACAR]	L7MJB4	Rhipicephalus pulchellus PE	76	85	35	54
transcript|tr|L7MIA7|L7MIA7_9ACAR Putative prolow-density lipoprotein receptor-related protein 1 (Fragment) OS=Rhipicephalus pulchellus PE=2 SV=1|e=8.29337E-56|from=2|to=349|frame=2|Fragment_1 - [Locus_15615_Transcript_1/1_Confidence_1.000_Length_351|repr	L7MIA7	Rhipicephalus pulchellus PE	44	31	21	26
representative transcript|tr|L7M1C7|L7M1C7_9ACAR Uncharacterized protein OS=Rhipicephalus pulchellus PE=2 SV=1|e=0|from=40|to=1947|frame=1|Fragment_2 - [Locus_7671_Transcript_1/6_Confidence_0.533_Length_2416|UNIGENE]	L7M1C7	Rhipicephalus pulchellus PE	24	26	22	31
representative transcript|tr|L7M2G3|L7M2G3_9ACAR Putative electron transfer flavoprotein ubiquinone oxidoreductase OS=Rhipicephalus pulchellus PE=2 SV=1|e=0|from=97|to=1914|frame=-3|Fragment_1 - [Locus_2313_Transcript_2/7_Confidence_0.667_Length_1955|UNIG	L7M2G3	Rhipicephalus pulchellus PE	32	23	22	32
representative transcript|tr|L7MHI3|L7MHI3_9ACAR Putative metalloprotease m41 ftsh metalloprotease m41 ftsh (Fragment) OS=Rhipicephalus pulchellus PE=2 SV=1|e=5.5077E-131|from=3|to=812|frame=-3|Fragment_2 - [Locus_2478_Transcript_1/8_Confidence_0.222_Leng	L7MHI3	Rhipicephalus pulchellus PE	27	44	17	49
transcript|tr|G3MH00|G3MH00_9ACAR Putative uncharacterized protein (Fragment) OS=Amblyomma maculatum PE=2 SV=1|e=5.7313E-167|from=171|to=1256|frame=3|Fragment_2 - [Locus_3434_Transcript_4/4_Confidence_0.625_Length_1351|representative]	G3MH00	Amblyomma maculatum PE	21	25	19	38
representative transcript|"tr|B7PYN9|B7PYN9_IXOSC Fatty acid synthase, putative OS=Ixodes scapularis GN=IscW_ISCW009053 PE=4 SV=1"|e=8.13789E-48|from=3|to=341|frame=-1|Fragment_1 - [Locus_12833_Transcript_1/1_Confidence_1.000_Length_341|UNIGENE]	B7PYN9	Ixodes scapularis GN	25	23	11	22
representative transcript|tr|L7MC04|L7MC04_9ACAR Putative tick transposon (Fragment) OS=Rhipicephalus pulchellus PE=2 SV=1|e=8.22406E-53|from=17|to=985|frame=-2|Fragment_1 - [Locus_14344_Transcript_1/1_Confidence_1.000_Length_989|UNIGENE]	L7MC04	Rhipicephalus pulchellus PE	5	20	10	23
representative transcript|tr|B7P9T2|B7P9T2_IXOSC Putative uncharacterized protein OS=Ixodes scapularis GN=IscW_ISCW002044 PE=4 SV=1|e=5.50014E-95|from=197|to=1603|frame=2|Fragment_2 - [Locus_6567_Transcript_1/1_Confidence_1.000_Length_1603|UNIGENE]	B7P9T2	Ixodes scapularis GN	19	28	13	23
transcript|tr|L7MBJ4|L7MBJ4_9ACAR Putative cytochrome (Fragment) OS=Rhipicephalus pulchellus PE=2 SV=1|e=6.09967E-84|from=1|to=546|frame=1|Fragment_2 - [Locus_16678_Transcript_1/1_Confidence_1.000_Length_633|representative]	L7MBJ4	Rhipicephalus pulchellus PE	24	27	9	25
representative transcript|tr|L7M226|L7M226_9ACAR Putative acyl-coa synthetase OS=Rhipicephalus pulchellus PE=2 SV=1|e=8.15902E-60|from=4|to=846|frame=1|Fragment_1 - [Locus_840_Transcript_1/3_Confidence_0.818_Length_914|UNIGENE]	L7M226	Rhipicephalus pulchellus PE	60	53	19	34
transcript|tr|L7MDT6|L7MDT6_9ACAR Putative pitrilysin metalloprotein (Fragment) OS=Rhipicephalus pulchellus PE=2 SV=1|e=1.8587E-123|from=2|to=778|frame=-2|Fragment_1 - [Locus_8220_Transcript_1/1_Confidence_1.000_Length_779|representative]	L7MDT6	Rhipicephalus pulchellus PE	23	19	5	23
representative transcript|tr|L7M9B6|L7M9B6_9ACAR Putative isoleucyl-trna synthetase OS=Rhipicephalus pulchellus PE=2 SV=1|e=9.5852E-115|from=3|to=581|frame=-1|Fragment_1 - [Locus_11338_Transcript_1/1_Confidence_1.000_Length_674|UNIGENE]	L7M9B6	Rhipicephalus pulchellus PE	53	55	0	43
transcript|tr|L7M4X5|L7M4X5_9ACAR Putative trna cytosine-5-methylase OS=Rhipicephalus pulchellus PE=2 SV=1|e=1.71532E-67|from=1|to=372|frame=1|Fragment_1 - [Locus_17721_Transcript_1/1_Confidence_1.000_Length_373|representative]	L7M4X5	Rhipicephalus pulchellus PE	24	38	0	33
representative transcript|"tr|B7QEV8|B7QEV8_IXOSC Pre-mRNA splicing factor, putative OS=Ixodes scapularis GN=IscW_ISCW022841 PE=4 SV=1"|e=4.44117E-64|from=3|to=437|frame=-3|Fragment_2 - [Locus_12227_Transcript_1/1_Confidence_1.000_Length_439|UNIGENE]	B7QEV8	Ixodes scapularis GN	16	17	0	30
representative transcript|tr|L7M897|L7M897_9ACAR Putative mitochondrial inner membrane protein mitofilin OS=Rhipicephalus pulchellus PE=2 SV=1|e=0|from=891|to=2891|frame=-1|Fragment_6 - [Locus_51_Transcript_1/2_Confidence_0.667_Length_2909|UNIGENE]	L7M897	Rhipicephalus pulchellus PE	17	28	23	25
representative transcript|tr|L7M714|L7M714_9ACAR Putative wd40-repeat-containing subunit of the 18s rrna processing complex OS=Rhipicephalus pulchellus PE=2 SV=1|e=0|from=106|to=1752|frame=1|Fragment_1 - [Locus_2632_Transcript_1/1_Confidence_1.000_Length_	L7M714	Rhipicephalus pulchellus PE	28	35	28	25
transcript|tr|G3MKI7|G3MKI7_9ACAR Putative uncharacterized protein OS=Amblyomma maculatum PE=2 SV=1|e=1.7777E-156|from=62|to=955|frame=-3|Fragment_2 - [Locus_1016_Transcript_1/1_Confidence_1.000_Length_990|representative]	G3MKI7	Amblyomma maculatum PE	0	16	28	21
transcript|tr|F4YZS8|F4YZS8_DERVA Vacuolar ATPase OS=Dermacentor variabilis PE=2 SV=1|e=8.9507E-47|from=1|to=264|frame=1|Fragment_1 - [Locus_8565_Transcript_1/1_Confidence_1.000_Length_265|representative]	F4YZS8	Dermacentor variabilis PE	29	28	21	31
transcript|tr|F1CGQ9|F1CGQ9_9ACAR Heat shock protein 90 OS=Panonychus citri GN=hsp90 PE=2 SV=1|e=0|from=3|to=2003|frame=-2|Fragment_3 - [Locus_2479_Transcript_1/2_Confidence_0.750_Length_2097|representative]	F1CGQ9	Panonychus citri GN	20	18	18	27
representative transcript|tr|L7M7F1|L7M7F1_9ACAR Uncharacterized protein OS=Rhipicephalus pulchellus PE=2 SV=1|e=4.1111E-171|from=1|to=942|frame=-2|Fragment_1 - [Locus_10234_Transcript_1/1_Confidence_1.000_Length_943|UNIGENE]	L7M7F1	Rhipicephalus pulchellus PE	35	39	23	32
transcript|tr|B0F457|B0F457_BOOMI Vitellogenin (Fragment) OS=Boophilus microplus PE=2 SV=1|e=0|from=56|to=1219|frame=-2|Fragment_1 - [Locus_3_Transcript_1/10_Confidence_0.458_Length_2210|representative]	B0F457	Boophilus microplus PE	113	123	43	73
representative transcript|tr|L7LYA9|L7LYA9_9ACAR Putative tick transposon OS=Rhipicephalus pulchellus PE=2 SV=1|e=9.50983E-20|from=1|to=249|frame=1|Fragment_1 - [Locus_17876_Transcript_1/1_Confidence_1.000_Length_250|UNIGENE]	L7LYA9	Rhipicephalus pulchellus PE	26	30	21	27
representative transcript|tr|L7MEJ4|L7MEJ4_9ACAR Putative metalloprotease protein (Fragment) OS=Rhipicephalus pulchellus PE=2 SV=1|e=0|from=202|to=3279|frame=1|Fragment_1 - [Locus_4268_Transcript_1/1_Confidence_1.000_Length_3350|UNIGENE]	L7MEJ4	Rhipicephalus pulchellus PE	0	24	21	20
transcript|tr|L7MK01|L7MK01_9ACAR Uncharacterized protein (Fragment) OS=Rhipicephalus pulchellus PE=2 SV=1|e=1.8647E-67|from=1|to=426|frame=1|Fragment_1 - [Locus_5740_Transcript_1/1_Confidence_1.000_Length_428|representative]	L7MK01	Rhipicephalus pulchellus PE	20	19	27	32
representative transcript|tr|B0X778|B0X778_CULQU Histone H3 OS=Culex quinquefasciatus GN=CpipJ_CPIJ015009 PE=3 SV=1|e=4.61806E-69|from=37|to=444|frame=1|Fragment_1 - [Locus_7594_Transcript_1/1_Confidence_1.000_Length_496|UNIGENE]	B0X778	Culex quinquefasciatus GN	0	0	26	27
representative transcript|tr|L7LVD8|L7LVD8_9ACAR Putative dead asp-glu-ala-asp box polypeptide 1 OS=Rhipicephalus pulchellus PE=2 SV=1|e=8.62004E-87|from=5|to=580|frame=2|Fragment_1 - [Locus_15789_Transcript_1/1_Confidence_1.000_Length_581|UNIGENE]	L7LVD8	Rhipicephalus pulchellus PE	12	40	20	36
transcript|"tr|B7QET6|B7QET6_IXOSC Phosphatidylinositol 3-kinase class, putative OS=Ixodes scapularis GN=IscW_ISCW022811 PE=4 SV=1"|e=0|from=1|to=1932|frame=1|Fragment_1 - [Locus_6666_Transcript_1/2_Confidence_0.750_Length_3666|representative]	B7QET6	Ixodes scapularis GN	24	33	19	31
representative transcript|tr|L7MDS3|L7MDS3_9ACAR Putative hyaluronoglucosaminidase (Fragment) OS=Rhipicephalus pulchellus PE=2 SV=1|e=0|from=45|to=1193|frame=-2|Fragment_1 - [Locus_1951_Transcript_1/1_Confidence_1.000_Length_1341|UNIGENE]	L7MDS3	Rhipicephalus pulchellus PE	18	28	21	35
transcript|tr|L7MK79|L7MK79_9ACAR Putative aspartyl-trna synthetase (Fragment) OS=Rhipicephalus pulchellus PE=2 SV=1|e=0|from=10|to=1683|frame=-2|Fragment_1 - [Locus_7374_Transcript_1/5_Confidence_0.615_Length_1852|representative]	L7MK79	Rhipicephalus pulchellus PE	11	25	20	24
representative transcript|tr|L7M6K9|L7M6K9_9ACAR Putative splicing factor 3b subunit 1 OS=Rhipicephalus pulchellus PE=2 SV=1|e=4.6945E-128|from=50|to=766|frame=-2|Fragment_2 - [Locus_13117_Transcript_1/1_Confidence_1.000_Length_767|UNIGENE]	L7M6K9	Rhipicephalus pulchellus PE	15	26	12	28
transcript|tr|L7MJ13|L7MJ13_9ACAR Uncharacterized protein (Fragment) OS=Rhipicephalus pulchellus PE=2 SV=1|e=0|from=241|to=2277|frame=1|Fragment_5 - [Locus_788_Transcript_5/7_Confidence_0.714_Length_2279|representative]	L7MJ13	Rhipicephalus pulchellus PE	26	29	15	24
transcript|tr|L7LU37|L7LU37_9ACAR Putative tick transposon OS=Rhipicephalus pulchellus PE=2 SV=1|e=9.38386E-44|from=1|to=273|frame=-3|Fragment_1 - [Locus_20964_Transcript_1/1_Confidence_1.000_Length_284|representative]	L7LU37	Rhipicephalus pulchellus PE	33	28	15	43
transcript|tr|L7LVT2|L7LVT2_9ACAR Putative nuclear helicase mop-3/sno dead-box superfamily OS=Rhipicephalus pulchellus PE=2 SV=1|e=0|from=1|to=1824|frame=-1|Fragment_3 - [Locus_5219_Transcript_1/1_Confidence_1.000_Length_2049|representative]	L7LVT2	Rhipicephalus pulchellus PE	23	11	14	21
representative transcript|tr|G3MQ36|G3MQ36_9ACAR Putative uncharacterized protein OS=Amblyomma maculatum PE=2 SV=1|e=7.10034E-31|from=143|to=346|frame=2|Fragment_1 - [Locus_10039_Transcript_1/1_Confidence_1.000_Length_347|UNIGENE]	G3MQ36	Amblyomma maculatum PE	13	22	12	25
representative transcript|tr|L7MA55|L7MA55_9ACAR Putative vacuolar h+-atpase v1 sector subunit a OS=Rhipicephalus pulchellus PE=2 SV=1|e=0|from=231|to=2069|frame=-1|Fragment_1 - [Locus_9469_Transcript_1/6_Confidence_0.533_Length_2144|UNIGENE]	L7MA55	Rhipicephalus pulchellus PE	16	28	14	26
representative transcript|tr|L7M822|L7M822_9ACAR Putative adenylosuccinate lyase OS=Rhipicephalus pulchellus PE=2 SV=1|e=1.6769E-172|from=2|to=946|frame=2|Fragment_1 - [Locus_4411_Transcript_1/2_Confidence_0.667_Length_947|UNIGENE]	L7M822	Rhipicephalus pulchellus PE	19	10	13	24
representative transcript|tr|L7LZV6|L7LZV6_9ACAR Putative vesicle-fusing atpase 2 OS=Rhipicephalus pulchellus PE=2 SV=1|e=0|from=1|to=1641|frame=-2|Fragment_2 - [Locus_12015_Transcript_1/1_Confidence_1.000_Length_1642|UNIGENE]	L7LZV6	Rhipicephalus pulchellus PE	31	31	12	25
transcript|tr|L7MI70|L7MI70_9ACAR Putative rna polymerase ii transcription elongation factor dsif/supt5h/spt5 (Fragment) OS=Rhipicephalus pulchellus PE=2 SV=1|e=2.23591E-53|from=2|to=307|frame=-2|Fragment_1 - [Locus_22479_Transcript_1/1_Confidence_1.000_L	L7MI70	Rhipicephalus pulchellus PE	6	20	12	24
representative transcript|tr|C9K2E7|C9K2E7_HAELO Lysine-ketoglutarate reductase/saccharopine dehydrogenase OS=Haemaphysalis longicornis GN=LKR/SDH PE=2 SV=1|e=0|from=3|to=1655|frame=3|Fragment_1 - [Locus_9719_Transcript_1/1_Confidence_1.000_Length_2372|UN	C9K2E7	Haemaphysalis longicornis GN	11	0	14	23
transcript|tr|L7M2K5|L7M2K5_9ACAR Putative log-like protein OS=Rhipicephalus pulchellus PE=2 SV=1|e=0|from=1|to=1785|frame=1|Fragment_1 - [Locus_22_Transcript_1/1_Confidence_1.000_Length_2060|representative]	L7M2K5	Rhipicephalus pulchellus PE	0	0	13	24
representative transcript|tr|D0UNG5|D0UNG5_APHCH Translational elongation factor-2 (Fragment) OS=Aphonopelma chalcodes PE=2 SV=1|e=0|from=486|to=2639|frame=-1|Fragment_4 - [Locus_146_Transcript_1/2_Confidence_0.750_Length_2639|UNIGENE]	D0UNG5	Aphonopelma chalcodes PE	33	34	13	25
representative transcript|tr|L7M9U5|L7M9U5_9ACAR Putative vacuolar sorting protein vps1 dynamin OS=Rhipicephalus pulchellus PE=2 SV=1|e=0|from=83|to=2119|frame=-3|Fragment_2 - [Locus_679_Transcript_1/1_Confidence_1.000_Length_2271|UNIGENE]	L7M9U5	Rhipicephalus pulchellus PE	21	30	11	19
representative transcript|tr|L7LZL2|L7LZL2_9ACAR Putative atp-dependent rna helicase OS=Rhipicephalus pulchellus PE=2 SV=1|e=7.7773E-143|from=3|to=764|frame=-1|Fragment_1 - [Locus_10322_Transcript_1/1_Confidence_1.000_Length_764|UNIGENE]	L7LZL2	Rhipicephalus pulchellus PE	24	25	15	28
representative transcript|tr|K7X6U2|K7X6U2_9ACAR Serpin 2 OS=Rhipicephalus haemaphysaloides PE=2 SV=1|e=0|from=172|to=1311|frame=-2|Fragment_1 - [Locus_7051_Transcript_4/4_Confidence_0.667_Length_1684|UNIGENE]	K7X6U2	Rhipicephalus haemaphysaloides PE	17	9	15	21
transcript|tr|L7M519|L7M519_9ACAR Putative carnitine palmitoyltransferase 1a liver OS=Rhipicephalus pulchellus PE=2 SV=1|e=0|from=203|to=2506|frame=2|Fragment_2 - [Locus_4039_Transcript_1/1_Confidence_1.000_Length_2791|representative]	L7M519	Rhipicephalus pulchellus PE	37	48	6	34
transcript|tr|L7MHT3|L7MHT3_9ACAR Putative low-density lipoprotein receptor (Fragment) OS=Rhipicephalus pulchellus PE=2 SV=1|e=0|from=3513|to=6314|frame=-1|Fragment_1 - [Locus_2253_Transcript_2/3_Confidence_0.667_Length_6353|representative]	L7MHT3	Rhipicephalus pulchellus PE	42	43	5	30
representative transcript|tr|L7M1M7|L7M1M7_9ACAR Putative puf family rna-binding protein OS=Rhipicephalus pulchellus PE=2 SV=1|e=0|from=3|to=1517|frame=3|Fragment_1 - [Locus_7949_Transcript_1/1_Confidence_1.000_Length_1536|UNIGENE]	L7M1M7	Rhipicephalus pulchellus PE	22	36	0	26
representative transcript|tr|L7MFQ0|L7MFQ0_9ACAR Putative atlastin-2 (Fragment) OS=Rhipicephalus pulchellus PE=2 SV=1|e=2.9556E-101|from=929|to=2260|frame=-2|Fragment_5 - [Locus_13977_Transcript_1/1_Confidence_1.000_Length_2528|UNIGENE]	L7MFQ0	Rhipicephalus pulchellus PE	23	26	0	35
representative transcript|tr|L7M664|L7M664_9ACAR Putative transcription initiation factor tfiib OS=Rhipicephalus pulchellus PE=2 SV=1|e=8.3163E-170|from=1269|to=2213|frame=-1|Fragment_1 - [Locus_4102_Transcript_1/1_Confidence_1.000_Length_2414|UNIGENE]	L7M664	Rhipicephalus pulchellus PE	16	20	0	26
transcript|"tr|B7Q2U5|B7Q2U5_IXOSC Cytochrome P450, putative OS=Ixodes scapularis GN=IscW_ISCW020282 PE=3 SV=1"|e=1.245E-126|from=93|to=1595|frame=-1|Fragment_4 - [Locus_4690_Transcript_1/1_Confidence_1.000_Length_1637|representative]	B7Q2U5	Ixodes scapularis GN	0	2	0	19
representative transcript|tr|L7MGI0|L7MGI0_9ACAR Uncharacterized protein (Fragment) OS=Rhipicephalus pulchellus PE=2 SV=1|e=0|from=332|to=2170|frame=-2|Fragment_1 - [Locus_1072_Transcript_2/2_Confidence_0.667_Length_2384|UNIGENE]	L7MGI0	Rhipicephalus pulchellus PE	16	0	0	21
transcript|tr|L7MHK1|L7MHK1_9ACAR Putative cullin-1 (Fragment) OS=Rhipicephalus pulchellus PE=2 SV=1|e=0|from=148|to=2517|frame=1|Fragment_1 - [Locus_2379_Transcript_1/1_Confidence_1.000_Length_4060|representative]	L7MHK1	Rhipicephalus pulchellus PE	25	35	27	21
transcript|tr|L7LY21|L7LY21_9ACAR Putative dual serine/threonine and tyrosine protein kinase OS=Rhipicephalus pulchellus PE=2 SV=1|e=7.0905E-165|from=2|to=907|frame=2|Fragment_1 - [Locus_13535_Transcript_1/1_Confidence_1.000_Length_909|representative]	L7LY21	Rhipicephalus pulchellus PE	21	34	27	26
Putative myosin class v heavy chain OS=Rhipicephalus pulchellus PE=2 SV=1|e=8.57955E-35|from=360|to=1601|frame=-2|Fragment_9 - [Locus_2117_Transcript_3/4_Confidence_0.500_Length_2631|.|tr|L7M947|L7M947_9ACAR]	L7M947	Rhipicephalus pulchellus PE	19	31	19	33
transcript|tr|L7M0Z1|L7M0Z1_9ACAR Putative patatin-like phospholipase domain protein OS=Rhipicephalus pulchellus PE=2 SV=1|e=6.97461E-54|from=2|to=316|frame=2|Fragment_1 - [Locus_14775_Transcript_1/1_Confidence_1.000_Length_657|representative]	L7M0Z1	Rhipicephalus pulchellus PE	11	27	20	25
representative transcript|tr|L7M7X2|L7M7X2_9ACAR Uncharacterized protein OS=Rhipicephalus pulchellus PE=2 SV=1|e=0|from=323|to=1531|frame=2|Fragment_1 - [Locus_432_Transcript_1/3_Confidence_0.714_Length_3462|UNIGENE]	L7M7X2	Rhipicephalus pulchellus PE	29	31	16	22
representative transcript|tr|L7M138|L7M138_9ACAR Putative this conserved domain family includes a large number OS=Rhipicephalus pulchellus PE=2 SV=1|e=0|from=469|to=1923|frame=1|Fragment_4 - [Locus_3067_Transcript_1/1_Confidence_1.000_Length_2046|UNIGENE]	L7M138	Rhipicephalus pulchellus PE	20	16	22	29
representative transcript|tr|B7QNH8|B7QNH8_IXOSC DNA-directed RNA polymerase OS=Ixodes scapularis GN=IscW_ISCW015181 PE=3 SV=1|e=0|from=61|to=3534|frame=1|Fragment_2 - [Locus_7471_Transcript_1/1_Confidence_1.000_Length_3594|UNIGENE]	B7QNH8	Ixodes scapularis GN	22	38	16	16
Putative zinc finger protein (Fragment) OS=Rhipicephalus pulchellus PE=2 SV=1|e=8.03451E-29|from=84|to=542|frame=-2|Fragment_3 - [Locus_8122_Transcript_1/1_Confidence_1.000_Length_576|.|tr|L7MFK1|L7MFK1_9ACAR]	L7MFK1	Rhipicephalus pulchellus PE	35	37	20	23
transcript|tr|L7M1D2|L7M1D2_9ACAR Putative eukaryotic translation initiation factor 3 theta subunit protein OS=Rhipicephalus pulchellus PE=2 SV=1|e=0|from=141|to=1601|frame=3|Fragment_1 - [Locus_572_Transcript_2/4_Confidence_0.700_Length_3203|representati	L7M1D2	Rhipicephalus pulchellus PE	30	25	19	24
representative transcript|tr|L7M596|L7M596_9ACAR Putative aminopeptidase of the m17 family OS=Rhipicephalus pulchellus PE=2 SV=1|e=0|from=274|to=1845|frame=-1|Fragment_2 - [Locus_7377_Transcript_1/1_Confidence_1.000_Length_1890|UNIGENE]	L7M596	Rhipicephalus pulchellus PE	18	28	17	24
representative transcript|tr|G3ML80|G3ML80_9ACAR Putative uncharacterized protein OS=Amblyomma maculatum PE=2 SV=1|e=0|from=1|to=1581|frame=1|Fragment_1 - [Locus_1044_Transcript_1/1_Confidence_1.000_Length_1895|UNIGENE]	G3ML80	Amblyomma maculatum PE	0	0	14	17
representative transcript|tr|L7M868|L7M868_9ACAR Uncharacterized protein OS=Rhipicephalus pulchellus PE=2 SV=1|e=0|from=1|to=1548|frame=1|Fragment_1 - [Locus_1074_Transcript_2/2_Confidence_0.833_Length_1709|UNIGENE]	L7M868	Rhipicephalus pulchellus PE	14	17	17	22
representative transcript|tr|L7MLE1|L7MLE1_9ACAR Uncharacterized protein (Fragment) OS=Rhipicephalus pulchellus PE=2 SV=1|e=3.81574E-16|from=70|to=324|frame=-2|Fragment_1 - [Locus_6069_Transcript_2/3_Confidence_0.600_Length_1984|UNIGENE]	L7MLE1	Rhipicephalus pulchellus PE	20	0	15	22
representative transcript|tr|L7M1K9|L7M1K9_9ACAR Putative mrna cleavage and polyadenylation factor i complex subunit rna14 OS=Rhipicephalus pulchellus PE=2 SV=1|e=0|from=3|to=1892|frame=-3|Fragment_1 - [Locus_2772_Transcript_1/1_Confidence_1.000_Length_18	L7M1K9	Rhipicephalus pulchellus PE	24	23	16	21
transcript|tr|Q4PMB2|Q4PMB2_IXOSC ADP/ATP translocase OS=Ixodes scapularis PE=2 SV=1|e=1.9063E-125|from=201|to=914|frame=-1|Fragment_2 - [Locus_500_Transcript_1/2_Confidence_0.750_Length_914|representative]	Q4PMB2	Ixodes scapularis PE	25	52	27	64
transcript|tr|L7LY18|L7LY18_9ACAR Putative tick transposon OS=Rhipicephalus pulchellus PE=2 SV=1|e=5.53185E-97|from=143|to=748|frame=2|Fragment_2 - [Locus_15588_Transcript_1/1_Confidence_1.000_Length_751|representative]	L7LY18	Rhipicephalus pulchellus PE	11	27	14	28
transcript|tr|L7LUH1|L7LUH1_9ACAR Putative histone-lysine n-methyltransferase setd2 OS=Rhipicephalus pulchellus PE=2 SV=1|e=4.22186E-30|from=2|to=388|frame=-2|Fragment_2 - [Locus_15530_Transcript_1/1_Confidence_1.000_Length_392|representative]	L7LUH1	Rhipicephalus pulchellus PE	30	24	21	31
representative transcript|tr|L7M3C0|L7M3C0_9ACAR Putative nadh:ubiquinone oxidoreductase ndufa10/42kda subunit OS=Rhipicephalus pulchellus PE=2 SV=1|e=0|from=99|to=1343|frame=3|Fragment_1 - [Locus_940_Transcript_1/2_Confidence_0.750_Length_1408|UNIGENE]	L7M3C0	Rhipicephalus pulchellus PE	18	20	13	22
representative transcript|tr|L7M706|L7M706_9ACAR Putative oligomycin sensitivity-conferring protein OS=Rhipicephalus pulchellus PE=2 SV=1|e=1.9179E-99|from=221|to=790|frame=-2|Fragment_1 - [Locus_1223_Transcript_1/1_Confidence_1.000_Length_791|UNIGENE]	L7M706	Rhipicephalus pulchellus PE	14	31	12	23
transcript|"tr|B7P6X9|B7P6X9_IXOSC Hemolectin, putative (Fragment) OS=Ixodes scapularis GN=IscW_ISCW001097 PE=4 SV=1"|e=9.71458E-41|from=2|to=358|frame=2|Fragment_1 - [Locus_19842_Transcript_1/1_Confidence_1.000_Length_358|representative]	B7P6X9	Ixodes scapularis GN	17	23	15	23
transcript|tr|L7M2I8|L7M2I8_9ACAR Putative focal adhesion protein pinch-1 OS=Rhipicephalus pulchellus PE=2 SV=1|e=0|from=1033|to=2043|frame=-3|Fragment_1 - [Locus_2747_Transcript_1/1_Confidence_1.000_Length_2150|representative]	L7M2I8	Rhipicephalus pulchellus PE	30	37	16	34
transcript|tr|L7M8Z9|L7M8Z9_9ACAR Putative histone acetylation protein OS=Rhipicephalus pulchellus PE=2 SV=1|e=3.2115E-150|from=2|to=805|frame=-3|Fragment_2 - [Locus_25683_Transcript_1/1_Confidence_1.000_Length_807|representative]	L7M8Z9	Rhipicephalus pulchellus PE	22	27	8	22
representative transcript|tr|G3MJM6|G3MJM6_9ACAR Putative uncharacterized protein (Fragment) OS=Amblyomma maculatum PE=2 SV=1|e=0|from=1|to=1149|frame=1|Fragment_1 - [Locus_1009_Transcript_1/1_Confidence_1.000_Length_3033|UNIGENE]	G3MJM6	Amblyomma maculatum PE	19	29	12	18
representative transcript|tr|G3MH45|G3MH45_9ACAR Putative uncharacterized protein (Fragment) OS=Amblyomma maculatum PE=2 SV=1|e=0|from=63|to=1259|frame=-2|Fragment_1 - [Locus_4771_Transcript_1/1_Confidence_1.000_Length_1380|UNIGENE]	G3MH45	Amblyomma maculatum PE	23	24	15	28
representative transcript|tr|G3MR22|G3MR22_9ACAR Dihydrolipoyl dehydrogenase OS=Amblyomma maculatum PE=2 SV=1|e=0|from=77|to=1615|frame=2|Fragment_1 - [Locus_3505_Transcript_1/1_Confidence_1.000_Length_1782|UNIGENE]	G3MR22	Amblyomma maculatum PE	22	22	10	26
representative transcript|tr|L7MBI9|L7MBI9_9ACAR Putative tick transposon (Fragment) OS=Rhipicephalus pulchellus PE=2 SV=1|e=0|from=3|to=2129|frame=3|Fragment_2 - [Locus_8003_Transcript_1/1_Confidence_1.000_Length_2330|UNIGENE]	L7MBI9	Rhipicephalus pulchellus PE	0	22	11	20
Putative mannose-6-phosphate/insulin receptor type ii OS=Rhipicephalus pulchellus PE=2 SV=1|e=6.11733E-18|from=4|to=906|frame=1|Fragment_4 - [Locus_15257_Transcript_1/2_Confidence_0.667_Length_935|.|tr|L7M250|L7M250_9ACAR]	L7M250	Rhipicephalus pulchellus PE	34	24	14	33
transcript|tr|L7LT74|L7LT74_9ACAR Putative swi/snf-related matrix-associated actin-dependent regulator OS=Rhipicephalus pulchellus PE=2 SV=1|e=6.43064E-65|from=1|to=378|frame=-2|Fragment_1 - [Locus_11172_Transcript_1/1_Confidence_1.000_Length_379|represen	L7LT74	Rhipicephalus pulchellus PE	18	27	10	17
representative transcript|tr|G3MHF6|G3MHF6_9ACAR Putative uncharacterized protein (Fragment) OS=Amblyomma maculatum PE=2 SV=1|e=0|from=3|to=1079|frame=-2|Fragment_2 - [Locus_7846_Transcript_2/2_Confidence_0.714_Length_1107|UNIGENE]	G3MHF6	Amblyomma maculatum PE	0	0	8	20
transcript|tr|L7M6M6|L7M6M6_9ACAR Putative dishevelled associated activator of morphoproteinsis OS=Rhipicephalus pulchellus PE=2 SV=1|e=9.94409E-58|from=1|to=378|frame=1|Fragment_2 - [Locus_17921_Transcript_1/1_Confidence_1.000_Length_379|representative]	L7M6M6	Rhipicephalus pulchellus PE	8	20	6	28
transcript|tr|G3MJ42|G3MJ42_9ACAR Putative uncharacterized protein (Fragment) OS=Amblyomma maculatum PE=2 SV=1|e=2.4719E-162|from=3393|to=4328|frame=-3|Fragment_1 - [Locus_4375_Transcript_2/7_Confidence_0.684_Length_4459|representative]	G3MJ42	Amblyomma maculatum PE	28	21	7	25
representative transcript|tr|L7M277|L7M277_9ACAR Uncharacterized protein OS=Rhipicephalus pulchellus PE=2 SV=1|e=0|from=1|to=1626|frame=1|Fragment_3 - [Locus_2743_Transcript_1/5_Confidence_0.692_Length_4518|UNIGENE]	L7M277	Rhipicephalus pulchellus PE	0	21	10	34
representative transcript|tr|G3MFH1|G3MFH1_9ACAR Putative uncharacterized protein (Fragment) OS=Amblyomma maculatum PE=2 SV=1|e=5.7246E-136|from=691|to=1737|frame=-1|Fragment_1 - [Locus_2617_Transcript_1/1_Confidence_1.000_Length_1824|UNIGENE]	G3MFH1	Amblyomma maculatum PE	19	14	8	25
transcript|tr|L7M8W7|L7M8W7_9ACAR Putative serine carboxypeptidase OS=Rhipicephalus pulchellus PE=2 SV=1|e=0|from=81|to=1430|frame=3|Fragment_2 - [Locus_5682_Transcript_2/2_Confidence_0.750_Length_2825|representative]	L7M8W7	Rhipicephalus pulchellus PE	18	25	4	17
transcript|tr|L7M2L9|L7M2L9_9ACAR Putative cysteine-rich motor neuron 1 protein OS=Rhipicephalus pulchellus PE=2 SV=1|e=6.1976E-164|from=1|to=768|frame=-2|Fragment_1 - [Locus_3611_Transcript_1/1_Confidence_1.000_Length_769|representative]	L7M2L9	Rhipicephalus pulchellus PE	16	40	7	33
representative transcript|tr|L7MFS1|L7MFS1_9ACAR Putative dead-box protein abstrakt (Fragment) OS=Rhipicephalus pulchellus PE=2 SV=1|e=3.46369E-72|from=4|to=462|frame=-3|Fragment_1 - [Locus_10220_Transcript_1/1_Confidence_1.000_Length_500|UNIGENE]	L7MFS1	Rhipicephalus pulchellus PE	18	20	2	19
representative transcript|tr|L7LVG2|L7LVG2_9ACAR Uncharacterized protein OS=Rhipicephalus pulchellus PE=2 SV=1|e=0|from=913|to=2859|frame=-3|Fragment_3 - [Locus_7806_Transcript_1/1_Confidence_1.000_Length_2861|UNIGENE]	L7LVG2	Rhipicephalus pulchellus PE	28	33	0	35
representative transcript|"tr|B7PQE0|B7PQE0_IXOSC Coatomer, alpha chain, putative (Fragment) OS=Ixodes scapularis GN=IscW_ISCW006283 PE=4 SV=1"|e=2.05284E-60|from=227|to=625|frame=2|Fragment_1 - [Locus_11683_Transcript_1/2_Confidence_0.667_Length_734|UNIG	B7PQE0	Ixodes scapularis GN	14	19	0	29
representative transcript|tr|L7LUD0|L7LUD0_9ACAR Putative e3 ubiquitin ligase OS=Rhipicephalus pulchellus PE=2 SV=1|e=1.1048E-161|from=32|to=943|frame=2|Fragment_3 - [Locus_16402_Transcript_1/1_Confidence_1.000_Length_1239|UNIGENE]	L7LUD0	Rhipicephalus pulchellus PE	14	19	0	24
representative transcript|"tr|B7Q2N1|B7Q2N1_IXOSC Serine/threonine protein kinase, putative OS=Ixodes scapularis GN=IscW_ISCW020637 PE=4 SV=1"|e=0|from=1526|to=3046|frame=-3|Fragment_2 - [Locus_2338_Transcript_1/5_Confidence_0.692_Length_3264|UNIGENE]	B7Q2N1	Ixodes scapularis GN	21	17	0	19
representative transcript|tr|G3MSY9|G3MSY9_9ACAR Putative uncharacterized protein OS=Amblyomma maculatum PE=2 SV=1|e=6.36989E-16|from=181|to=330|frame=1|Fragment_1 - [Locus_14366_Transcript_1/1_Confidence_1.000_Length_332|UNIGENE]	G3MSY9	Amblyomma maculatum PE	36	44	22	30
transcript|tr|L7MJU0|L7MJU0_9ACAR Putative phosphatidylinositol-45-bisphosphate 3-kinase catalytic subunit alpha isoform (Fragment) OS=Rhipicephalus pulchellus PE=2 SV=1|e=0|from=3|to=2603|frame=3|Fragment_1 - [Locus_11603_Transcript_1/1_Confidence_1.000_	L7MJU0	Rhipicephalus pulchellus PE	19	17	20	22
representative transcript|tr|L7LU00|L7LU00_9ACAR Uncharacterized protein OS=Rhipicephalus pulchellus PE=2 SV=1|e=9.9229E-106|from=885|to=1733|frame=-1|Fragment_3 - [Locus_2172_Transcript_1/2_Confidence_0.750_Length_1739|UNIGENE]	L7LU00	Rhipicephalus pulchellus PE	28	34	25	29
representative transcript|tr|G3MMQ4|G3MMQ4_9ACAR 60S ribosomal protein L18a OS=Amblyomma maculatum PE=2 SV=1|e=2.04636E-90|from=61|to=555|frame=-3|Fragment_1 - [Locus_509_Transcript_1/1_Confidence_1.000_Length_557|UNIGENE]	G3MMQ4	Amblyomma maculatum PE	0	0	24	23
transcript|tr|G3MMQ4|G3MMQ4_9ACAR 60S ribosomal protein L18a OS=Amblyomma maculatum PE=2 SV=1|e=3.202E-94|from=60|to=575|frame=-2|Fragment_1 - [Locus_894_Transcript_1/1_Confidence_1.000_Length_576|representative]	G3MMQ4	Amblyomma maculatum PE	0	0	24	23
representative transcript|tr|L7MEX3|L7MEX3_9ACAR Putative gmp synthase (Fragment) OS=Rhipicephalus pulchellus PE=2 SV=1|e=0|from=56|to=2140|frame=2|Fragment_1 - [Locus_3089_Transcript_10/11_Confidence_0.556_Length_3079|UNIGENE]	L7MEX3	Rhipicephalus pulchellus PE	25	25	18	17
representative transcript|tr|E9FRW4|E9FRW4_DAPPU Putative uncharacterized protein OS=Daphnia pulex GN=DAPPUDRAFT_299812 PE=3 SV=1|e=0|from=31|to=1323|frame=1|Fragment_2 - [Locus_17_Transcript_1/1_Confidence_1.000_Length_1408|UNIGENE]	E9FRW4	Daphnia pulex GN	33	40	23	31
transcript|tr|L7LZP3|L7LZP3_9ACAR Putative gulp engulfment adaptor ptb domain protein OS=Rhipicephalus pulchellus PE=2 SV=1|e=0|from=1904|to=3109|frame=-1|Fragment_1 - [Locus_1126_Transcript_1/2_Confidence_0.750_Length_3310|representative]	L7LZP3	Rhipicephalus pulchellus PE	22	18	19	27
representative transcript|tr|L7M532|L7M532_9ACAR Putative acyl-coa oxidase OS=Rhipicephalus pulchellus PE=2 SV=1|e=0|from=3091|to=5187|frame=-3|Fragment_2 - [Locus_3198_Transcript_1/1_Confidence_1.000_Length_5318|UNIGENE]	L7M532	Rhipicephalus pulchellus PE	26	32	18	22
representative transcript|"tr|B7QI53|B7QI53_IXOSC Apoptosis-promoting RNA-binding protein TIA-1/TIAR, putative OS=Ixodes scapularis GN=IscW_ISCW014211 PE=4 SV=1"|e=0|from=469|to=2520|frame=1|Fragment_1 - [Locus_582_Transcript_1/2_Confidence_0.750_Length_2	B7QI53	Ixodes scapularis GN	32	33	18	21
representative transcript|tr|L7M2I7|L7M2I7_9ACAR Putative rna-binding translational regulator irp aconitase superfamily OS=Rhipicephalus pulchellus PE=2 SV=1|e=0|from=3|to=2324|frame=3|Fragment_2 - [Locus_1657_Transcript_2/6_Confidence_0.667_Length_2694|U	L7M2I7	Rhipicephalus pulchellus PE	14	34	24	28
representative transcript|tr|L7M7R7|L7M7R7_9ACAR Putative atp synthase subunit b OS=Rhipicephalus pulchellus PE=2 SV=1|e=6.1169E-146|from=96|to=893|frame=3|Fragment_1 - [Locus_260_Transcript_2/3_Confidence_0.714_Length_959|UNIGENE]	L7M7R7	Rhipicephalus pulchellus PE	14	23	17	18
representative transcript|tr|L7LZY7|L7LZY7_9ACAR Putative 26s proteasome regulatory complex subunit OS=Rhipicephalus pulchellus PE=2 SV=1|e=0|from=66|to=1439|frame=3|Fragment_2 - [Locus_569_Transcript_1/1_Confidence_1.000_Length_1593|UNIGENE]	L7LZY7	Rhipicephalus pulchellus PE	23	28	16	16
representative transcript|tr|G3MPC2|G3MPC2_9ACAR Putative uncharacterized protein OS=Amblyomma maculatum PE=2 SV=1|e=0|from=439|to=2214|frame=-3|Fragment_1 - [Locus_8_Transcript_2/2_Confidence_0.750_Length_2405|UNIGENE]	G3MPC2	Amblyomma maculatum PE	40	51	27	41
representative transcript|tr|A1Z8U0|A1Z8U0_DROME Pre-mRNA processing factor 8 OS=Drosophila melanogaster GN=Prp8 PE=4 SV=1|e=0|from=3|to=2732|frame=-1|Fragment_1 - [Locus_2868_Transcript_1/3_Confidence_0.714_Length_2732|UNIGENE]	A1Z8U0	Drosophila melanogaster GN	17	25	15	17
representative transcript|tr|G3MPB1|G3MPB1_9ACAR T-complex protein 1 subunit alpha OS=Amblyomma maculatum PE=2 SV=1|e=0|from=126|to=1772|frame=3|Fragment_1 - [Locus_453_Transcript_1/1_Confidence_1.000_Length_1869|UNIGENE]	G3MPB1	Amblyomma maculatum PE	15	15	14	20
representative transcript|tr|G3MLC1|G3MLC1_9ACAR Pyruvate kinase OS=Amblyomma maculatum PE=2 SV=1|e=0|from=1|to=1476|frame=1|Fragment_1 - [Locus_2337_Transcript_1/7_Confidence_0.647_Length_4187|UNIGENE]	G3MLC1	Amblyomma maculatum PE	34	32	20	23
transcript|tr|I2FJS8|I2FJS8_TACTR Complement component 2/factor B variant 2 OS=Tachypleus tridentatus GN=TtC2/Bf-2 PE=2 SV=1|e=2.80424E-34|from=37|to=678|frame=1|Fragment_7 - [Locus_17696_Transcript_1/1_Confidence_1.000_Length_787|representative]	I2FJS8	Tachypleus tridentatus GN	14	26	23	25
representative transcript|tr|L7LYF6|L7LYF6_9ACAR Uncharacterized protein OS=Rhipicephalus pulchellus PE=2 SV=1|e=0|from=2|to=1480|frame=2|Fragment_1 - [Locus_5267_Transcript_1/1_Confidence_1.000_Length_1545|UNIGENE]	L7LYF6	Rhipicephalus pulchellus PE	14	17	12	21
representative transcript|tr|G3MPU2|G3MPU2_9ACAR Putative uncharacterized protein OS=Amblyomma maculatum PE=2 SV=1|e=0|from=34|to=1548|frame=1|Fragment_3 - [Locus_3777_Transcript_1/1_Confidence_1.000_Length_1585|UNIGENE]	G3MPU2	Amblyomma maculatum PE	45	39	17	29
representative transcript|tr|L7M7G4|L7M7G4_9ACAR Putative actin-binding cytoskeleton protein filamin OS=Rhipicephalus pulchellus PE=2 SV=1|e=0|from=619|to=2484|frame=1|Fragment_1 - [Locus_9097_Transcript_1/1_Confidence_1.000_Length_2485|UNIGENE]	L7M7G4	Rhipicephalus pulchellus PE	15	19	14	15
representative transcript|tr|G3MQN1|G3MQN1_9ACAR Putative uncharacterized protein OS=Amblyomma maculatum PE=2 SV=1|e=0|from=255|to=1733|frame=3|Fragment_1 - [Locus_81_Transcript_1/3_Confidence_0.714_Length_1823|UNIGENE]	G3MQN1	Amblyomma maculatum PE	11	13	14	20
representative transcript|tr|L7MJR7|L7MJR7_9ACAR Putative phosphoglycerate mutase (Fragment) OS=Rhipicephalus pulchellus PE=2 SV=1|e=0|from=57|to=1685|frame=3|Fragment_1 - [Locus_985_Transcript_2/3_Confidence_0.667_Length_1827|UNIGENE]	L7MJR7	Rhipicephalus pulchellus PE	14	23	15	20
representative transcript|tr|L7M2F9|L7M2F9_9ACAR Uncharacterized protein OS=Rhipicephalus pulchellus PE=2 SV=1|e=0|from=213|to=2021|frame=-3|Fragment_3 - [Locus_65_Transcript_2/3_Confidence_0.667_Length_2305|UNIGENE]	L7M2F9	Rhipicephalus pulchellus PE	34	8	14	22
representative transcript|tr|L7M363|L7M363_9ACAR Putative arginyl-trna-protein transferase OS=Rhipicephalus pulchellus PE=2 SV=1|e=0|from=99|to=1628|frame=-2|Fragment_1 - [Locus_9385_Transcript_1/1_Confidence_1.000_Length_1851|UNIGENE]	L7M363	Rhipicephalus pulchellus PE	25	35	14	24
transcript|tr|G3MGJ6|G3MGJ6_9ACAR Putative uncharacterized protein (Fragment) OS=Amblyomma maculatum PE=2 SV=1|e=0|from=73|to=1392|frame=1|Fragment_2 - [Locus_540_Transcript_1/1_Confidence_1.000_Length_3466|representative]	G3MGJ6	Amblyomma maculatum PE	36	39	17	30
representative transcript|tr|L7LWM9|L7LWM9_9ACAR Putative karyopherin importin beta 3 OS=Rhipicephalus pulchellus PE=2 SV=1|e=0|from=2|to=3202|frame=2|Fragment_3 - [Locus_211_Transcript_1/1_Confidence_1.000_Length_3386|UNIGENE]	L7LWM9	Rhipicephalus pulchellus PE	21	32	13	25
transcript|tr|L7MFM4|L7MFM4_9ACAR Putative egalitarian (Fragment) OS=Rhipicephalus pulchellus PE=2 SV=1|e=0|from=105|to=2369|frame=3|Fragment_2 - [Locus_5931_Transcript_1/1_Confidence_1.000_Length_2521|representative]	L7MFM4	Rhipicephalus pulchellus PE	15	18	10	22
transcript|tr|L7M5D4|L7M5D4_9ACAR Putative map kinase activated protein-kinase-2 OS=Rhipicephalus pulchellus PE=2 SV=1|e=0|from=105|to=1358|frame=3|Fragment_1 - [Locus_3118_Transcript_1/1_Confidence_1.000_Length_1558|representative]	L7M5D4	Rhipicephalus pulchellus PE	23	26	13	23
representative transcript|tr|L7MGL4|L7MGL4_9ACAR Putative methionyl-trna synthetase (Fragment) OS=Rhipicephalus pulchellus PE=2 SV=1|e=0|from=156|to=2255|frame=-2|Fragment_1 - [Locus_387_Transcript_3/4_Confidence_0.700_Length_3084|UNIGENE]	L7MGL4	Rhipicephalus pulchellus PE	0	0	19	31
representative transcript|tr|L7MKF1|L7MKF1_9ACAR Putative vacuolar assembly/sorting protein vps16 (Fragment) OS=Rhipicephalus pulchellus PE=2 SV=1|e=1.40935E-86|from=3|to=494|frame=3|Fragment_2 - [Locus_14604_Transcript_1/1_Confidence_1.000_Length_494|UNI	L7MKF1	Rhipicephalus pulchellus PE	20	37	14	21
transcript|"tr|B7PJA9|B7PJA9_IXOSC Killer toxin-resistance protein, putative OS=Ixodes scapularis GN=IscW_ISCW004613 PE=4 SV=1"|e=0|from=2|to=1435|frame=-3|Fragment_1 - [Locus_1133_Transcript_1/2_Confidence_0.750_Length_1437|representative]	B7PJA9	Ixodes scapularis GN	25	27	18	88
representative transcript|tr|L7MHC4|L7MHC4_9ACAR Putative dihydrolipoamide acetyltransferase (Fragment) OS=Rhipicephalus pulchellus PE=2 SV=1|e=0|from=360|to=1874|frame=-3|Fragment_3 - [Locus_1799_Transcript_1/1_Confidence_1.000_Length_1948|UNIGENE]	L7MHC4	Rhipicephalus pulchellus PE	17	12	13	21
transcript|tr|L7MBC4|L7MBC4_9ACAR Putative tick salivary antigen-5 protein OS=Rhipicephalus pulchellus PE=2 SV=1|e=0|from=61|to=1371|frame=-3|Fragment_1 - [Locus_2880_Transcript_1/1_Confidence_1.000_Length_1511|representative]	L7MBC4	Rhipicephalus pulchellus PE	13	0	15	22
representative transcript|tr|L7M3H9|L7M3H9_9ACAR Putative long-chain acyl-coa synthetase amp-forming OS=Rhipicephalus pulchellus PE=2 SV=1|e=0|from=1150|to=3288|frame=-1|Fragment_1 - [Locus_2922_Transcript_1/6_Confidence_0.688_Length_3453|UNIGENE]	L7M3H9	Rhipicephalus pulchellus PE	25	26	10	20
representative transcript|tr|L7M109|L7M109_9ACAR Uncharacterized protein OS=Rhipicephalus pulchellus PE=2 SV=1|e=0|from=468|to=1799|frame=-2|Fragment_2 - [Locus_783_Transcript_1/1_Confidence_1.000_Length_1956|UNIGENE]	L7M109	Rhipicephalus pulchellus PE	18	23	12	34
representative transcript|tr|G3MFJ4|G3MFJ4_9ACAR Putative uncharacterized protein (Fragment) OS=Amblyomma maculatum PE=2 SV=1|e=0|from=67|to=1470|frame=1|Fragment_2 - [Locus_3433_Transcript_1/1_Confidence_1.000_Length_2979|UNIGENE]	G3MFJ4	Amblyomma maculatum PE	11	26	9	17
representative transcript|tr|L7MAL5|L7MAL5_9ACAR Uncharacterized protein OS=Rhipicephalus pulchellus PE=2 SV=1|e=1.3032E-147|from=1|to=882|frame=1|Fragment_2 - [Locus_1802_Transcript_3/4_Confidence_0.444_Length_884|UNIGENE]	L7MAL5	Rhipicephalus pulchellus PE	16	22	11	20
representative transcript|tr|G3MHY7|G3MHY7_9ACAR Putative uncharacterized protein (Fragment) OS=Amblyomma maculatum PE=2 SV=1|e=0|from=231|to=1385|frame=3|Fragment_4 - [Locus_756_Transcript_1/3_Confidence_0.714_Length_1770|UNIGENE]	G3MHY7	Amblyomma maculatum PE	18	33	11	24
transcript|tr|L7LYI1|L7LYI1_9ACAR Putative mediator complex subunit 14 OS=Rhipicephalus pulchellus PE=2 SV=1|e=3.41774E-58|from=2|to=325|frame=-2|Fragment_1 - [Locus_17307_Transcript_1/1_Confidence_1.000_Length_380|representative]	L7LYI1	Rhipicephalus pulchellus PE	24	23	13	42
representative transcript|tr|L7M6S7|L7M6S7_9ACAR Uncharacterized protein OS=Rhipicephalus pulchellus PE=2 SV=1|e=0|from=149|to=1966|frame=2|Fragment_3 - [Locus_2602_Transcript_1/1_Confidence_1.000_Length_2179|UNIGENE]	L7M6S7	Rhipicephalus pulchellus PE	19	10	8	22
representative transcript|tr|L7MDD3|L7MDD3_9ACAR Putative tick transposon (Fragment) OS=Rhipicephalus pulchellus PE=2 SV=1|e=1.59894E-19|from=5|to=289|frame=2|Fragment_1 - [Locus_24274_Transcript_1/1_Confidence_1.000_Length_289|UNIGENE]	L7MDD3	Rhipicephalus pulchellus PE	23	25	6	23
representative transcript|tr|L7M6P4|L7M6P4_9ACAR Putative microtubule-associated protein dynactin dctn1/glued OS=Rhipicephalus pulchellus PE=2 SV=1|e=9.37434E-72|from=3|to=413|frame=-1|Fragment_1 - [Locus_15652_Transcript_1/1_Confidence_1.000_Length_425|U	L7M6P4	Rhipicephalus pulchellus PE	20	33	8	24
representative transcript|tr|B7QBW3|B7QBW3_IXOSC Dimethylaniline monooxygenase [N-oxide-forming] OS=Ixodes scapularis GN=IscW_ISCW012544 PE=3 SV=1|e=3.3719E-159|from=707|to=2182|frame=2|Fragment_2 - [Locus_45_Transcript_9/14_Confidence_0.614_Length_5827|U	B7QBW3	Ixodes scapularis GN	22	23	6	20
representative transcript|"tr|B7PWF5|B7PWF5_IXOSC Heat shock protein 20.5, putative OS=Ixodes scapularis GN=IscW_ISCW007793 PE=3 SV=1"|e=1.31215E-80|from=921|to=1484|frame=-3|Fragment_2 - [Locus_2881_Transcript_1/1_Confidence_1.000_Length_1603|UNIGENE]	B7PWF5	Ixodes scapularis GN	20	15	5	26
transcript|tr|L7LT72|L7LT72_9ACAR Putative peroxisomal carnitine o-octanoyltransferase OS=Rhipicephalus pulchellus PE=2 SV=1|e=8.10918E-56|from=2|to=316|frame=-1|Fragment_1 - [Locus_8050_Transcript_1/1_Confidence_1.000_Length_316|representative]	L7LT72	Rhipicephalus pulchellus PE	10	5	5	20
representative transcript|"tr|B7PKW5|B7PKW5_IXOSC Hfb2 protein, putative OS=Ixodes scapularis GN=IscW_ISCW005690 PE=4 SV=1"|e=0|from=137|to=1393|frame=2|Fragment_2 - [Locus_481_Transcript_1/1_Confidence_1.000_Length_2180|UNIGENE]	B7PKW5	Ixodes scapularis GN	3	31	3	21
transcript|tr|L7LPN0|L7LPN0_9ACAR Putative rho gtpase binding protein OS=Rhipicephalus pulchellus PE=2 SV=1|e=9.22813E-60|from=3|to=344|frame=-2|Fragment_1 - [Locus_17226_Transcript_1/1_Confidence_1.000_Length_345|representative]	L7LPN0	Rhipicephalus pulchellus PE	19	21	6	23
transcript|tr|L7MG08|L7MG08_9ACAR Uncharacterized protein (Fragment) OS=Rhipicephalus pulchellus PE=2 SV=1|e=2.81535E-76|from=34|to=642|frame=-2|Fragment_1 - [Locus_5753_Transcript_1/1_Confidence_1.000_Length_643|representative]	L7MG08	Rhipicephalus pulchellus PE	22	27	5	27
transcript|"tr|B7P346|B7P346_IXOSC Dystrophin, putative OS=Ixodes scapularis GN=IscW_ISCW001113 PE=4 SV=1"|e=9.15642E-23|from=9|to=1532|frame=3|Fragment_6 - [Locus_14764_Transcript_1/2_Confidence_0.750_Length_1547|representative]	B7P346	Ixodes scapularis GN	8	0	1	19
representative transcript|tr|G3MK99|G3MK99_9ACAR Putative uncharacterized protein OS=Amblyomma maculatum PE=2 SV=1|e=0|from=3|to=1838|frame=3|Fragment_2 - [Locus_6957_Transcript_1/1_Confidence_1.000_Length_2034|UNIGENE]	G3MK99	Amblyomma maculatum PE	16	17	0	22
transcript|tr|L7M3J6|L7M3J6_9ACAR Uncharacterized protein OS=Rhipicephalus pulchellus PE=2 SV=1|e=0|from=2|to=1207|frame=2|Fragment_1 - [Locus_9501_Transcript_1/1_Confidence_1.000_Length_1321|representative]	L7M3J6	Rhipicephalus pulchellus PE	12	19	0	21
transcript|tr|L7M6K9|L7M6K9_9ACAR Putative splicing factor 3b subunit 1 OS=Rhipicephalus pulchellus PE=2 SV=1|e=0|from=3|to=1190|frame=3|Fragment_2 - [Locus_9538_Transcript_1/1_Confidence_1.000_Length_1190|representative]	L7M6K9	Rhipicephalus pulchellus PE	11	15	0	19
representative transcript|tr|L7MIE6|L7MIE6_9ACAR Putative ikappab kinase complex ikap component (Fragment) OS=Rhipicephalus pulchellus PE=2 SV=1|e=4.96533E-84|from=5|to=487|frame=2|Fragment_1 - [Locus_17427_Transcript_1/1_Confidence_1.000_Length_489|UNIGE	L7MIE6	Rhipicephalus pulchellus PE	11	12	0	38
transcript|tr|L7M3S9|L7M3S9_9ACAR Uncharacterized protein OS=Rhipicephalus pulchellus PE=2 SV=1|e=5.6736E-31|from=520|to=864|frame=1|Fragment_4 - [Locus_2448_Transcript_1/1_Confidence_1.000_Length_864|representative]	L7M3S9	Rhipicephalus pulchellus PE	31	28	27	20
representative transcript|tr|G3MPE0|G3MPE0_9ACAR Catalase OS=Amblyomma maculatum PE=2 SV=1|e=0|from=2|to=1486|frame=-3|Fragment_1 - [Locus_258_Transcript_1/1_Confidence_1.000_Length_1515|UNIGENE]	G3MPE0	Amblyomma maculatum PE	0	23	32	39
representative transcript|tr|L7MFB1|L7MFB1_9ACAR Putative transcription factor l2 (Fragment) OS=Rhipicephalus pulchellus PE=2 SV=1|e=0|from=862|to=2610|frame=1|Fragment_3 - [Locus_2476_Transcript_1/5_Confidence_0.667_Length_3790|UNIGENE]	L7MFB1	Rhipicephalus pulchellus PE	30	35	18	44
representative transcript|tr|L7M4D3|L7M4D3_9ACAR Putative der and-287 heat shock-related protein OS=Rhipicephalus pulchellus PE=2 SV=1|e=4.0087E-100|from=1|to=543|frame=1|Fragment_1 - [Locus_5840_Transcript_1/1_Confidence_1.000_Length_980|UNIGENE]	L7M4D3	Rhipicephalus pulchellus PE	25	23	17	28
transcript|"tr|B7Q655|B7Q655_IXOSC Epidermal growth factor receptor, putative (Fragment) OS=Ixodes scapularis GN=IscW_ISCW021718 PE=3 SV=1"|e=0|from=1128|to=2648|frame=3|Fragment_5 - [Locus_1440_Transcript_1/1_Confidence_1.000_Length_5811|representative]	B7Q655	Ixodes scapularis GN	20	24	15	23
representative transcript|tr|L7LYU6|L7LYU6_9ACAR Putative twin OS=Rhipicephalus pulchellus PE=2 SV=1|e=0|from=2463|to=3566|frame=-2|Fragment_1 - [Locus_1212_Transcript_1/1_Confidence_1.000_Length_3693|UNIGENE]	L7LYU6	Rhipicephalus pulchellus PE	10	25	17	26
transcript|tr|L7MED8|L7MED8_9ACAR Putative acetyltransferase (Fragment) OS=Rhipicephalus pulchellus PE=2 SV=1|e=5.0945E-114|from=2|to=595|frame=2|Fragment_1 - [Locus_9109_Transcript_1/1_Confidence_1.000_Length_596|representative]	L7MED8	Rhipicephalus pulchellus PE	36	26	16	32
representative transcript|tr|L7MA90|L7MA90_9ACAR Uncharacterized protein OS=Rhipicephalus pulchellus PE=2 SV=1|e=4.64792E-74|from=2|to=433|frame=2|Fragment_1 - [Locus_11920_Transcript_1/1_Confidence_1.000_Length_434|UNIGENE]	L7MA90	Rhipicephalus pulchellus PE	9	27	16	20
representative transcript|tr|L7M0H3|L7M0H3_9ACAR Putative phosphatidylinositol transfer protein pdr16 OS=Rhipicephalus pulchellus PE=2 SV=1|e=2.66906E-24|from=350|to=667|frame=2|Fragment_1 - [Locus_2732_Transcript_2/2_Confidence_0.400_Length_668|UNIGENE]	L7M0H3	Rhipicephalus pulchellus PE	3	16	17	19
representative transcript|tr|Q4PM37|Q4PM37_IXOSC Ribosomal protein L7-like OS=Ixodes scapularis GN=IscW_ISCW004030 PE=2 SV=1|e=5.8055E-119|from=1|to=693|frame=-2|Fragment_2 - [Locus_276_Transcript_1/2_Confidence_0.750_Length_748|UNIGENE]	Q4PM37	Ixodes scapularis GN	10	4	16	16
representative transcript|tr|L7LWY6|L7LWY6_9ACAR Putative chaperonin complex component tcp-1 beta subunit cct2 OS=Rhipicephalus pulchellus PE=2 SV=1|e=0|from=100|to=1698|frame=1|Fragment_2 - [Locus_4144_Transcript_1/1_Confidence_1.000_Length_1812|UNIGENE]	L7LWY6	Rhipicephalus pulchellus PE	37	46	20	29
representative transcript|tr|L7MHL2|L7MHL2_9ACAR Putative membrane glycoprotein lig-1 (Fragment) OS=Rhipicephalus pulchellus PE=2 SV=1|e=0|from=2|to=2488|frame=2|Fragment_3 - [Locus_2015_Transcript_1/6_Confidence_0.688_Length_3352|UNIGENE]	L7MHL2	Rhipicephalus pulchellus PE	21	28	14	19
representative transcript|tr|Q4PMB6|Q4PMB6_IXOSC 60S ribosomal protein L7a OS=Ixodes scapularis PE=2 SV=1|e=1.5919E-131|from=190|to=864|frame=1|Fragment_1 - [Locus_168_Transcript_1/1_Confidence_1.000_Length_915|UNIGENE]	Q4PMB6	Ixodes scapularis PE	17	30	15	22
representative transcript|tr|G3MQI0|G3MQI0_9ACAR Putative uncharacterized protein OS=Amblyomma maculatum PE=2 SV=1|e=0|from=1255|to=2595|frame=-1|Fragment_1 - [Locus_52_Transcript_1/1_Confidence_1.000_Length_2619|UNIGENE]	G3MQI0	Amblyomma maculatum PE	16	26	13	19
transcript|tr|L7LTQ3|L7LTQ3_9ACAR Putative deah-box rna helicase OS=Rhipicephalus pulchellus PE=2 SV=1|e=0|from=1|to=2511|frame=1|Fragment_2 - [Locus_11426_Transcript_1/1_Confidence_1.000_Length_2512|representative]	L7LTQ3	Rhipicephalus pulchellus PE	37	36	31	46
transcript|tr|L7M5A9|L7M5A9_9ACAR Putative alpha-2-macroglobulin receptor-associated protein OS=Rhipicephalus pulchellus PE=2 SV=1|e=4.1816E-114|from=1|to=621|frame=1|Fragment_1 - [Locus_12845_Transcript_1/1_Confidence_1.000_Length_622|representative]	L7M5A9	Rhipicephalus pulchellus PE	11	16	19	27
transcript|tr|L7M049|L7M049_9ACAR Putative long-chain acyl-coa synthetase amp-forming OS=Rhipicephalus pulchellus PE=2 SV=1|e=3.4457E-40|from=2|to=391|frame=-2|Fragment_1 - [Locus_14699_Transcript_1/1_Confidence_1.000_Length_392|representative]	L7M049	Rhipicephalus pulchellus PE	8	17	15	21
representative transcript|tr|L7MHZ0|L7MHZ0_9ACAR Putative acyl-coa synthetase (Fragment) OS=Rhipicephalus pulchellus PE=2 SV=1|e=5.47629E-82|from=5|to=1315|frame=2|Fragment_1 - [Locus_991_Transcript_3/6_Confidence_0.571_Length_1638|UNIGENE]	L7MHZ0	Rhipicephalus pulchellus PE	20	37	11	23
transcript|tr|G3MQ94|G3MQ94_9ACAR Putative uncharacterized protein OS=Amblyomma maculatum PE=2 SV=1|e=4.57985E-35|from=6|to=434|frame=3|Fragment_1 - [Locus_11045_Transcript_1/1_Confidence_1.000_Length_588|representative]	G3MQ94	Amblyomma maculatum PE	10	36	16	19
representative transcript|tr|G3MQ94|G3MQ94_9ACAR Putative uncharacterized protein OS=Amblyomma maculatum PE=2 SV=1|e=9.689E-106|from=1687|to=2625|frame=-1|Fragment_1 - [Locus_2118_Transcript_1/1_Confidence_1.000_Length_2727|UNIGENE]	G3MQ94	Amblyomma maculatum PE	38	24	18	19
representative transcript|tr|L7M8Y8|L7M8Y8_9ACAR Putative e3 ubiquitin-protein ligase ubr4 OS=Rhipicephalus pulchellus PE=2 SV=1|e=0|from=1|to=1896|frame=1|Fragment_1 - [Locus_1711_Transcript_1/1_Confidence_1.000_Length_1965|UNIGENE]	L7M8Y8	Rhipicephalus pulchellus PE	19	18	13	17
transcript|tr|L7LZ16|L7LZ16_9ACAR Putative spatacsin OS=Rhipicephalus pulchellus PE=2 SV=1|e=4.63743E-59|from=3|to=359|frame=-1|Fragment_1 - [Locus_18745_Transcript_1/1_Confidence_1.000_Length_359|representative]	L7LZ16	Rhipicephalus pulchellus PE	16	17	13	16
representative transcript|tr|L7M0N6|L7M0N6_9ACAR Uncharacterized protein OS=Rhipicephalus pulchellus PE=2 SV=1|e=0|from=189|to=1421|frame=-3|Fragment_1 - [Locus_1122_Transcript_1/3_Confidence_0.400_Length_1597|UNIGENE]	L7M0N6	Rhipicephalus pulchellus PE	17	13	13	18
transcript|tr|L7M3J3|L7M3J3_9ACAR Putative rhogap1a OS=Rhipicephalus pulchellus PE=2 SV=1|e=1.08064E-63|from=2|to=349|frame=2|Fragment_2 - [Locus_27611_Transcript_1/1_Confidence_1.000_Length_351|representative]	L7M3J3	Rhipicephalus pulchellus PE	10	19	13	15
transcript|tr|Q8I6X6|Q8I6X6_BOOMI Notch-like protein OS=Boophilus microplus GN=BOTCH PE=2 SV=1|e=0|from=3|to=1250|frame=3|Fragment_1 - [Locus_13366_Transcript_1/1_Confidence_1.000_Length_1250|representative]	Q8I6X6	Boophilus microplus GN	13	24	13	18
representative transcript|tr|L7MKH4|L7MKH4_9ACAR Uncharacterized protein (Fragment) OS=Rhipicephalus pulchellus PE=2 SV=1|e=9.40762E-44|from=2|to=253|frame=2|Fragment_1 - [Locus_22828_Transcript_1/1_Confidence_1.000_Length_255|UNIGENE]	L7MKH4	Rhipicephalus pulchellus PE	18	21	15	17
transcript|tr|L7M1H8|L7M1H8_9ACAR Putative translation initiation factor 2c eif-2c OS=Rhipicephalus pulchellus PE=2 SV=1|e=1.1675E-155|from=1|to=822|frame=-1|Fragment_1 - [Locus_10254_Transcript_1/1_Confidence_1.000_Length_822|representative]	L7M1H8	Rhipicephalus pulchellus PE	18	23	17	17
representative transcript|tr|L7M677|L7M677_9ACAR Putative coiled-coil and c2 domain-containing protein 1a OS=Rhipicephalus pulchellus PE=2 SV=1|e=5.42505E-31|from=1|to=297|frame=1|Fragment_1 - [Locus_12005_Transcript_1/1_Confidence_1.000_Length_298|UNIGEN	L7M677	Rhipicephalus pulchellus PE	22	24	13	19
representative transcript|tr|L7M000|L7M000_9ACAR Putative 26s proteasome regulatory subunit OS=Rhipicephalus pulchellus PE=2 SV=1|e=0|from=1|to=1179|frame=1|Fragment_1 - [Locus_8249_Transcript_1/1_Confidence_1.000_Length_1477|UNIGENE]	L7M000	Rhipicephalus pulchellus PE	13	12	13	16
representative transcript|tr|L7M7T5|L7M7T5_9ACAR Putative smooth muscle myosin heavy chain 11 isoform sm1-like strongylocentrotus purpuratus OS=Rhipicephalus pulchellus PE=2 SV=1|e=1.3219E-110|from=1|to=714|frame=-3|Fragment_1 - [Locus_12240_Transcript_1/	L7M7T5	Rhipicephalus pulchellus PE	24	23	16	22
transcript|"tr|B7Q5K4|B7Q5K4_IXOSC Radixin, moesin, putative OS=Ixodes scapularis GN=IscW_ISCW021858 PE=4 SV=1"|e=0|from=959|to=2362|frame=-1|Fragment_1 - [Locus_71_Transcript_1/8_Confidence_0.667_Length_2401|representative]	B7Q5K4	Ixodes scapularis GN	22	21	13	19
transcript|tr|L7M2G5|L7M2G5_9ACAR Putative mrna capping enzyme guanylyltransferase alpha subunit OS=Rhipicephalus pulchellus PE=2 SV=1|e=6.416E-178|from=2|to=970|frame=2|Fragment_1 - [Locus_11829_Transcript_1/1_Confidence_1.000_Length_1005|representative]	L7M2G5	Rhipicephalus pulchellus PE	10	17	10	16
transcript|tr|L7M7R4|L7M7R4_9ACAR Putative glycerol metabolic process OS=Rhipicephalus pulchellus PE=2 SV=1|e=1.8041E-150|from=101|to=946|frame=2|Fragment_1 - [Locus_6407_Transcript_2/4_Confidence_0.364_Length_947|representative]	L7M7R4	Rhipicephalus pulchellus PE	25	19	9	17
representative transcript|tr|G3MPK4|G3MPK4_9ACAR Putative uncharacterized protein OS=Amblyomma maculatum PE=2 SV=1|e=7.06365E-82|from=5|to=520|frame=2|Fragment_1 - [Locus_12034_Transcript_1/1_Confidence_1.000_Length_527|UNIGENE]	G3MPK4	Amblyomma maculatum PE	30	30	12	33
representative transcript|tr|L7M7W2|L7M7W2_9ACAR Putative fructose-biphosphate aldolase OS=Rhipicephalus pulchellus PE=2 SV=1|e=0|from=205|to=1296|frame=1|Fragment_1 - [Locus_304_Transcript_1/2_Confidence_0.750_Length_2451|UNIGENE]	L7M7W2	Rhipicephalus pulchellus PE	0	12	9	14
representative transcript|tr|L7MGS3|L7MGS3_9ACAR Putative atp-dependent rna helicase (Fragment) OS=Rhipicephalus pulchellus PE=2 SV=1|e=0|from=435|to=2951|frame=-2|Fragment_3 - [Locus_3179_Transcript_1/1_Confidence_1.000_Length_3087|UNIGENE]	L7MGS3	Rhipicephalus pulchellus PE	8	15	10	18
transcript|tr|L7MB04|L7MB04_9ACAR Putative thiol-disulfide isomerase and thioredoxin OS=Rhipicephalus pulchellus PE=2 SV=1|e=0|from=2|to=1213|frame=2|Fragment_2 - [Locus_613_Transcript_1/1_Confidence_1.000_Length_3435|representative]	L7MB04	Rhipicephalus pulchellus PE	0	15	11	15
representative transcript|tr|L7M4B2|L7M4B2_9ACAR Putative spliceosome-associated coiled-coil protein OS=Rhipicephalus pulchellus PE=2 SV=1|e=3.7784E-112|from=18|to=806|frame=3|Fragment_2 - [Locus_11591_Transcript_1/1_Confidence_1.000_Length_859|UNIGENE]	L7M4B2	Rhipicephalus pulchellus PE	14	14	21	22
transcript|tr|L7M1I9|L7M1I9_9ACAR Putative atp-dependent rna helicase ddx54 OS=Rhipicephalus pulchellus PE=2 SV=1|e=7.94753E-94|from=1|to=522|frame=1|Fragment_1 - [Locus_12837_Transcript_1/1_Confidence_1.000_Length_522|representative]	L7M1I9	Rhipicephalus pulchellus PE	14	8	13	24
representative transcript|tr|L7M2N4|L7M2N4_9ACAR Putative lysyl-trna synthetase class ii OS=Rhipicephalus pulchellus PE=2 SV=1|e=0|from=44|to=1744|frame=2|Fragment_2 - [Locus_4183_Transcript_1/1_Confidence_1.000_Length_2188|UNIGENE]	L7M2N4	Rhipicephalus pulchellus PE	0	0	14	22
representative transcript|"tr|B7PC82|B7PC82_IXOSC Thimet oligopeptidase, putative OS=Ixodes scapularis GN=IscW_ISCW017437 PE=3 SV=1"|e=1.7852E-165|from=355|to=1641|frame=1|Fragment_1 - [Locus_1035_Transcript_1/3_Confidence_0.714_Length_1643|UNIGENE]	B7PC82	Ixodes scapularis GN	30	37	25	53
representative transcript|tr|B7Q0E7|B7Q0E7_IXOSC DNA-directed RNA polymerase (Fragment) OS=Ixodes scapularis GN=IscW_ISCW009615 PE=3 SV=1|e=5.7782E-166|from=2|to=1021|frame=2|Fragment_1 - [Locus_11582_Transcript_1/1_Confidence_1.000_Length_1022|UNIGENE]	B7Q0E7	Ixodes scapularis GN	15	16	10	17
representative transcript|tr|L7MJB0|L7MJB0_9ACAR Putative kif1-binding protein (Fragment) OS=Rhipicephalus pulchellus PE=2 SV=1|e=4.37851E-57|from=2|to=352|frame=-3|Fragment_1 - [Locus_17473_Transcript_1/1_Confidence_1.000_Length_354|UNIGENE]	L7MJB0	Rhipicephalus pulchellus PE	12	0	9	17
representative transcript|tr|L7M4S2|L7M4S2_9ACAR Putative akap7 2'5' rna ligase-like domain protein OS=Rhipicephalus pulchellus PE=2 SV=1|e=0|from=183|to=1328|frame=-3|Fragment_2 - [Locus_1236_Transcript_1/1_Confidence_1.000_Length_1387|UNIGENE]	L7M4S2	Rhipicephalus pulchellus PE	7	24	12	23
representative transcript|tr|Q45VP9|Q45VP9_DERVA Vitellogenin receptor OS=Dermacentor variabilis GN=VgR PE=2 SV=3|e=0|from=1|to=2421|frame=1|Fragment_3 - [Locus_5261_Transcript_1/1_Confidence_1.000_Length_2584|UNIGENE]	Q45VP9	Dermacentor variabilis GN	4	15	7	22
representative transcript|tr|L7M8M6|L7M8M6_9ACAR Putative gpi-anchor transamidase OS=Rhipicephalus pulchellus PE=2 SV=1|e=0|from=167|to=1240|frame=2|Fragment_1 - [Locus_1479_Transcript_1/1_Confidence_1.000_Length_1398|UNIGENE]	L7M8M6	Rhipicephalus pulchellus PE	13	14	7	20
transcript|tr|L7MKD7|L7MKD7_9ACAR Uncharacterized protein (Fragment) OS=Rhipicephalus pulchellus PE=2 SV=1|e=0|from=5201|to=6490|frame=-3|Fragment_1 - [Locus_3518_Transcript_1/2_Confidence_0.750_Length_6768|representative]	L7MKD7	Rhipicephalus pulchellus PE	10	13	8	15
representative transcript|"tr|B7P5B1|B7P5B1_IXOSC MUC5AC protein, putative OS=Ixodes scapularis GN=IscW_ISCW015780 PE=4 SV=1"|e=6.77132E-39|from=7|to=444|frame=1|Fragment_1 - [Locus_4300_Transcript_1/1_Confidence_1.000_Length_505|UNIGENE]	B7P5B1	Ixodes scapularis GN	8	20	3	23
representative transcript|tr|L7MAV5|L7MAV5_9ACAR Putative tick transposon (Fragment) OS=Rhipicephalus pulchellus PE=2 SV=1|e=5.55138E-87|from=582|to=1613|frame=-1|Fragment_1 - [Locus_3220_Transcript_1/1_Confidence_1.000_Length_1613|UNIGENE]	L7MAV5	Rhipicephalus pulchellus PE	36	31	9	34
representative transcript|tr|L7LXI3|L7LXI3_9ACAR Putative 5'-amp-activated protein kinase gamma subunit OS=Rhipicephalus pulchellus PE=2 SV=1|e=0|from=246|to=1295|frame=-2|Fragment_1 - [Locus_12566_Transcript_1/1_Confidence_1.000_Length_1479|UNIGENE]	L7LXI3	Rhipicephalus pulchellus PE	15	23	0	17
representative transcript|tr|L7LWW6|L7LWW6_9ACAR Putative tick transposon OS=Rhipicephalus pulchellus PE=2 SV=1|e=0|from=2166|to=4157|frame=-3|Fragment_4 - [Locus_10812_Transcript_1/1_Confidence_1.000_Length_4252|UNIGENE]	L7LWW6	Rhipicephalus pulchellus PE	13	15	0	18
representative transcript|tr|A9P774|A9P774_BOOMI Phosphoenolpyruvate carboxykinase OS=Boophilus microplus GN=bmPEPCK PE=2 SV=1|e=0|from=228|to=2117|frame=3|Fragment_2 - [Locus_1542_Transcript_1/1_Confidence_1.000_Length_2460|UNIGENE]	A9P774	Boophilus microplus GN	0	16	0	20
representative transcript|tr|G3MGS0|G3MGS0_9ACAR Putative uncharacterized protein (Fragment) OS=Amblyomma maculatum PE=2 SV=1|e=0|from=44|to=2413|frame=-2|Fragment_5 - [Locus_1107_Transcript_1/1_Confidence_1.000_Length_2516|UNIGENE]	G3MGS0	Amblyomma maculatum PE	14	14	0	34
representative transcript|tr|L7M9V5|L7M9V5_9ACAR Putative signal recognition particle receptor alpha subunit OS=Rhipicephalus pulchellus PE=2 SV=1|e=0|from=841|to=2796|frame=-2|Fragment_6 - [Locus_2985_Transcript_5/8_Confidence_0.667_Length_2854|UNIGENE]	L7M9V5	Rhipicephalus pulchellus PE	19	13	0	21
representative transcript|tr|G3MGZ3|G3MGZ3_9ACAR Putative uncharacterized protein (Fragment) OS=Amblyomma maculatum PE=2 SV=1|e=5.98139E-91|from=1|to=489|frame=-3|Fragment_1 - [Locus_12098_Transcript_1/1_Confidence_1.000_Length_665|UNIGENE]	G3MGZ3	Amblyomma maculatum PE	14	10	0	20
LIM domain-containing protein, putative OS=Ixodes scapularis GN=IscW_ISCW016762 PE=4 SV=1"|e=6.01472E-20|from=401|to=730|frame=2|Fragment_1 - [Locus_601_Transcript_1/10_Confidence_0.115_Length_737|.|"tr|B7PDH9|B7PDH9_IXOSC]	B7PDH9	Ixodes scapularis GN	5	0	0	23
representative transcript|tr|L7LX95|L7LX95_9ACAR Uncharacterized protein OS=Rhipicephalus pulchellus PE=2 SV=1|e=4.8131E-114|from=94|to=2115|frame=-2|Fragment_1 - [Locus_1088_Transcript_4/9_Confidence_0.615_Length_2353|UNIGENE]	L7LX95	Rhipicephalus pulchellus PE	38	26	21	17
transcript|tr|G3MQ04|G3MQ04_9ACAR Putative uncharacterized protein OS=Amblyomma maculatum PE=2 SV=1|e=1.8258E-136|from=129|to=1073|frame=-1|Fragment_1 - [Locus_1241_Transcript_1/1_Confidence_1.000_Length_1373|representative]	G3MQ04	Amblyomma maculatum PE	20	29	22	21
transcript|tr|L7M9D5|L7M9D5_9ACAR Putative dna repair protein OS=Rhipicephalus pulchellus PE=2 SV=1|e=8.3778E-85|from=2|to=511|frame=2|Fragment_1 - [Locus_12287_Transcript_1/1_Confidence_1.000_Length_511|representative]	L7M9D5	Rhipicephalus pulchellus PE	42	34	19	23
representative transcript|tr|L7MLR0|L7MLR0_9ACAR Putative annexin (Fragment) OS=Rhipicephalus pulchellus PE=2 SV=1|e=0|from=34|to=1476|frame=1|Fragment_4 - [Locus_578_Transcript_1/2_Confidence_0.667_Length_3216|UNIGENE]	L7MLR0	Rhipicephalus pulchellus PE	20	20	22	20
transcript|tr|L7M2K6|L7M2K6_9ACAR Putative cytochrome p450 family 3 subfamily protein a polypeptide 5 OS=Rhipicephalus pulchellus PE=2 SV=1|e=9.50751E-73|from=3|to=617|frame=3|Fragment_1 - [Locus_4544_Transcript_1/1_Confidence_1.000_Length_1002|representa	L7M2K6	Rhipicephalus pulchellus PE	32	27	22	21
transcript|tr|L7MF97|L7MF97_9ACAR Putative myosin class i heavy chain (Fragment) OS=Rhipicephalus pulchellus PE=2 SV=1|e=0|from=212|to=2149|frame=2|Fragment_1 - [Locus_6234_Transcript_1/1_Confidence_1.000_Length_2149|representative]	L7MF97	Rhipicephalus pulchellus PE	17	16	19	19
representative transcript|"tr|B7Q3I4|B7Q3I4_IXOSC ABC transporter, putative OS=Ixodes scapularis GN=IscW_ISCW009589 PE=3 SV=1"|e=0|from=127|to=2022|frame=1|Fragment_4 - [Locus_2526_Transcript_1/1_Confidence_1.000_Length_2092|UNIGENE]	B7Q3I4	Ixodes scapularis GN	16	17	19	14
representative transcript|tr|L7MJA7|L7MJA7_9ACAR Putative translation initiation factor if-2 (Fragment) OS=Rhipicephalus pulchellus PE=2 SV=1|e=0|from=1688|to=4456|frame=2|Fragment_9 - [Locus_886_Transcript_1/3_Confidence_0.667_Length_5789|UNIGENE]	L7MJA7	Rhipicephalus pulchellus PE	35	34	24	21
transcript|tr|F1L3U5|F1L3U5_ASCSU Actin-2 OS=Ascaris suum PE=2 SV=1|e=0|from=17|to=1144|frame=2|Fragment_1 - [Locus_281_Transcript_1/3_Confidence_0.667_Length_1666|representative]	F1L3U5	Ascaris suum PE	46	39	33	24
transcript|tr|L7MHS5|L7MHS5_9ACAR Putative dystrophin (Fragment) OS=Rhipicephalus pulchellus PE=2 SV=1|e=0|from=2|to=2476|frame=-2|Fragment_1 - [Locus_2980_Transcript_1/2_Confidence_0.750_Length_2591|representative]	L7MHS5	Rhipicephalus pulchellus PE	23	27	24	24
transcript|tr|L7M6Y6|L7M6Y6_9ACAR Putative ubiquitin-protein ligase OS=Rhipicephalus pulchellus PE=2 SV=1|e=6.9807E-132|from=2|to=1006|frame=2|Fragment_1 - [Locus_10581_Transcript_1/1_Confidence_1.000_Length_1007|representative]	L7M6Y6	Rhipicephalus pulchellus PE	30	52	21	33
transcript|tr|L7MDI8|L7MDI8_9ACAR Putative tick transposon (Fragment) OS=Rhipicephalus pulchellus PE=2 SV=1|e=8.57047E-13|from=113|to=385|frame=-3|Fragment_1 - [Locus_17360_Transcript_1/1_Confidence_1.000_Length_402|representative]	L7MDI8	Rhipicephalus pulchellus PE	14	24	24	17
representative transcript|tr|L7LRB7|L7LRB7_9ACAR Putative tnf receptor-associated factor OS=Rhipicephalus pulchellus PE=2 SV=1|e=0|from=73|to=1350|frame=-2|Fragment_1 - [Locus_11821_Transcript_1/2_Confidence_0.750_Length_1351|UNIGENE]	L7LRB7	Rhipicephalus pulchellus PE	24	31	26	34
representative transcript|tr|L7LVE0|L7LVE0_9ACAR Putative peroxisomal long-chain acyl-coa transporter abc superfamily OS=Rhipicephalus pulchellus PE=2 SV=1|e=0|from=181|to=1959|frame=-1|Fragment_2 - [Locus_1258_Transcript_1/4_Confidence_0.700_Length_1959|	L7LVE0	Rhipicephalus pulchellus PE	19	25	24	22
representative transcript|tr|G3MHQ2|G3MHQ2_9ACAR Putative uncharacterized protein (Fragment) OS=Amblyomma maculatum PE=2 SV=1|e=1.4569E-122|from=5|to=706|frame=2|Fragment_1 - [Locus_465_Transcript_1/1_Confidence_1.000_Length_743|UNIGENE]	G3MHQ2	Amblyomma maculatum PE	0	16	17	16
representative transcript|tr|L7MA73|L7MA73_9ACAR Uncharacterized protein OS=Rhipicephalus pulchellus PE=2 SV=1|e=0|from=1|to=1644|frame=1|Fragment_3 - [Locus_6692_Transcript_1/2_Confidence_0.750_Length_1836|UNIGENE]	L7MA73	Rhipicephalus pulchellus PE	6	15	17	19
representative transcript|tr|L7M2B3|L7M2B3_9ACAR Putative chorion peroxidase-like protein OS=Rhipicephalus pulchellus PE=2 SV=1|e=0|from=240|to=2483|frame=-2|Fragment_1 - [Locus_2160_Transcript_1/2_Confidence_0.667_Length_2736|UNIGENE]	L7M2B3	Rhipicephalus pulchellus PE	23	16	17	19
representative transcript|"tr|B7PQF4|B7PQF4_IXOSC Sulfotransferase, putative OS=Ixodes scapularis GN=IscW_ISCW005531 PE=4 SV=1"|e=6.62513E-49|from=60|to=653|frame=3|Fragment_1 - [Locus_5879_Transcript_1/1_Confidence_1.000_Length_772|UNIGENE]	B7PQF4	Ixodes scapularis GN	5	18	26	23
representative transcript|tr|L7M108|L7M108_9ACAR Putative serine/threonine-protein kinase rio3 OS=Rhipicephalus pulchellus PE=2 SV=1|e=0|from=103|to=1770|frame=-3|Fragment_4 - [Locus_2653_Transcript_1/2_Confidence_0.750_Length_1907|UNIGENE]	L7M108	Rhipicephalus pulchellus PE	10	0	15	16
transcript|tr|L7M537|L7M537_9ACAR Putative mitogen inducible protein product OS=Rhipicephalus pulchellus PE=2 SV=1|e=0|from=89|to=2134|frame=-2|Fragment_1 - [Locus_6002_Transcript_1/1_Confidence_1.000_Length_2477|representative]	L7M537	Rhipicephalus pulchellus PE	17	29	15	17
representative transcript|tr|L7M7V4|L7M7V4_9ACAR Putative myosin OS=Rhipicephalus pulchellus PE=2 SV=1|e=0|from=594|to=1817|frame=-3|Fragment_1 - [Locus_5941_Transcript_1/1_Confidence_1.000_Length_1819|UNIGENE]	L7M7V4	Rhipicephalus pulchellus PE	16	22	16	16
transcript|"tr|B7QH79|B7QH79_IXOSC Secreted protein, putative OS=Ixodes scapularis GN=IscW_ISCW023166 PE=4 SV=1"|e=2.40537E-37|from=373|to=942|frame=-1|Fragment_1 - [Locus_849_Transcript_2/2_Confidence_0.800_Length_1308|representative]	B7QH79	Ixodes scapularis GN	8	14	13	14
transcript|tr|L7MAW1|L7MAW1_9ACAR Putative tick transposon (Fragment) OS=Rhipicephalus pulchellus PE=2 SV=1|e=2.31268E-15|from=56|to=502|frame=-1|Fragment_2 - [Locus_3098_Transcript_1/1_Confidence_1.000_Length_502|representative]	L7MAW1	Rhipicephalus pulchellus PE	19	13	15	22
representative transcript|tr|L7M0R4|L7M0R4_9ACAR Putative rna methylase involved in rrna processing OS=Rhipicephalus pulchellus PE=2 SV=1|e=0|from=178|to=1665|frame=-3|Fragment_4 - [Locus_3389_Transcript_1/1_Confidence_1.000_Length_1880|UNIGENE]	L7M0R4	Rhipicephalus pulchellus PE	27	22	15	16
representative transcript|tr|L7M285|L7M285_9ACAR Putative cytoplasmic exosomal rna helicase ski2 dead-box superfamily OS=Rhipicephalus pulchellus PE=2 SV=1|e=0|from=393|to=1508|frame=-3|Fragment_2 - [Locus_11086_Transcript_1/1_Confidence_1.000_Length_1510	L7M285	Rhipicephalus pulchellus PE	7	25	12	14
transcript|tr|L7M1H5|L7M1H5_9ACAR Uncharacterized protein OS=Rhipicephalus pulchellus PE=2 SV=1|e=2.62485E-22|from=1|to=144|frame=-2|Fragment_1 - [Locus_15928_Transcript_1/1_Confidence_1.000_Length_343|representative]	L7M1H5	Rhipicephalus pulchellus PE	15	22	20	16
transcript|tr|L7MCR9|L7MCR9_9ACAR Uncharacterized protein (Fragment) OS=Rhipicephalus pulchellus PE=2 SV=1|e=1.6254E-152|from=3|to=797|frame=3|Fragment_1 - [Locus_1812_Transcript_3/4_Confidence_0.250_Length_1021|representative]	L7MCR9	Rhipicephalus pulchellus PE	14	24	19	22
representative transcript|tr|L7M087|L7M087_9ACAR Uncharacterized protein OS=Rhipicephalus pulchellus PE=2 SV=1|e=3.63621E-16|from=1|to=198|frame=-1|Fragment_1 - [Locus_8541_Transcript_1/1_Confidence_1.000_Length_444|UNIGENE]	L7M087	Rhipicephalus pulchellus PE	9	21	22	23
representative transcript|tr|L7MB76|L7MB76_9ACAR Putative tick adams OS=Rhipicephalus pulchellus PE=2 SV=1|e=0|from=197|to=3553|frame=2|Fragment_1 - [Locus_4215_Transcript_1/2_Confidence_0.833_Length_4314|UNIGENE]	L7MB76	Rhipicephalus pulchellus PE	16	21	16	17
transcript|tr|L7MAG1|L7MAG1_9ACAR Uncharacterized protein OS=Rhipicephalus pulchellus PE=2 SV=1|e=0|from=2|to=1330|frame=2|Fragment_2 - [Locus_5895_Transcript_1/2_Confidence_0.750_Length_2643|representative]	L7MAG1	Rhipicephalus pulchellus PE	25	22	17	32
representative transcript|tr|L7LYS7|L7LYS7_9ACAR Putative chromatin remodeling complex swi/snf component swi2 OS=Rhipicephalus pulchellus PE=2 SV=1|e=0|from=219|to=2846|frame=3|Fragment_5 - [Locus_4799_Transcript_1/3_Confidence_0.714_Length_2847|UNIGENE]	L7LYS7	Rhipicephalus pulchellus PE	22	16	21	34
representative transcript|tr|L7MDM1|L7MDM1_9ACAR Uncharacterized protein (Fragment) OS=Rhipicephalus pulchellus PE=2 SV=1|e=1.78033E-12|from=275|to=586|frame=-1|Fragment_2 - [Locus_15812_Transcript_1/1_Confidence_1.000_Length_664|UNIGENE]	L7MDM1	Rhipicephalus pulchellus PE	0	33	18	30
transcript|tr|L7MDW7|L7MDW7_9ACAR Putative serine/threonine-protein kinase haspin (Fragment) OS=Rhipicephalus pulchellus PE=2 SV=1|e=0|from=3|to=1406|frame=-1|Fragment_4 - [Locus_1072_Transcript_1/1_Confidence_1.000_Length_1637|representative]	L7MDW7	Rhipicephalus pulchellus PE	31	34	18	23
representative transcript|tr|L7MMT2|L7MMT2_9ACAR Putative tick transposon (Fragment) OS=Rhipicephalus pulchellus PE=2 SV=1|e=2.1276E-116|from=718|to=2022|frame=-2|Fragment_1 - [Locus_184_Transcript_1/1_Confidence_1.000_Length_2182|UNIGENE]	L7MMT2	Rhipicephalus pulchellus PE	22	27	14	22
representative transcript|tr|L7LRQ3|L7LRQ3_9ACAR Putative rna polymerase i large subunit OS=Rhipicephalus pulchellus PE=2 SV=1|e=6.89339E-55|from=3|to=314|frame=-1|Fragment_1 - [Locus_20633_Transcript_1/1_Confidence_1.000_Length_314|UNIGENE]	L7LRQ3	Rhipicephalus pulchellus PE	17	22	12	20
transcript|tr|L7MA76|L7MA76_9ACAR Putative tick transposon (Fragment) OS=Rhipicephalus pulchellus PE=2 SV=1|e=8.37067E-24|from=2|to=349|frame=2|Fragment_1 - [Locus_10385_Transcript_1/1_Confidence_1.000_Length_351|representative]	L7MA76	Rhipicephalus pulchellus PE	25	22	15	22
transcript|tr|L7MF45|L7MF45_9ACAR Putative c2h2-type zn-finger protein (Fragment) OS=Rhipicephalus pulchellus PE=2 SV=1|e=0|from=58|to=1185|frame=1|Fragment_1 - [Locus_3273_Transcript_1/1_Confidence_1.000_Length_1190|representative]	L7MF45	Rhipicephalus pulchellus PE	19	15	13	20
representative transcript|tr|G3MI35|G3MI35_9ACAR Putative uncharacterized protein (Fragment) OS=Amblyomma maculatum PE=2 SV=1|e=7.29606E-92|from=3|to=503|frame=3|Fragment_1 - [Locus_1992_Transcript_1/2_Confidence_0.667_Length_603|UNIGENE]	G3MI35	Amblyomma maculatum PE	13	10	18	22
transcript|tr|L7M907|L7M907_9ACAR Putative myosin class v heavy chain OS=Rhipicephalus pulchellus PE=2 SV=1|e=3.4544E-120|from=1|to=678|frame=-2|Fragment_1 - [Locus_9210_Transcript_1/1_Confidence_1.000_Length_679|representative]	L7M907	Rhipicephalus pulchellus PE	40	38	10	21
transcript|tr|L7MDM1|L7MDM1_9ACAR Uncharacterized protein (Fragment) OS=Rhipicephalus pulchellus PE=2 SV=1|e=2.81054E-11|from=29|to=289|frame=-1|Fragment_1 - [Locus_21953_Transcript_1/1_Confidence_1.000_Length_295|representative]	L7MDM1	Rhipicephalus pulchellus PE	11	42	15	29
Putative granulin (Fragment) OS=Rhipicephalus pulchellus PE=2 SV=1|e=5.58526E-22|from=3|to=350|frame=3|Fragment_1 - [Locus_11675_Transcript_1/1_Confidence_1.000_Length_797|.|tr|L7MJV7|L7MJV7_9ACAR]	L7MJV7	Rhipicephalus pulchellus PE	44	52	18	31
representative transcript|tr|B7Q412|B7Q412_IXOSC Putative uncharacterized protein OS=Ixodes scapularis GN=IscW_ISCW011070 PE=4 SV=1|e=8.4096E-99|from=2|to=1636|frame=2|Fragment_3 - [Locus_8721_Transcript_1/2_Confidence_0.750_Length_1637|UNIGENE]	B7Q412	Ixodes scapularis GN	27	30	12	17
transcript|tr|G3MTB2|G3MTB2_9ACAR Putative uncharacterized protein OS=Amblyomma maculatum PE=2 SV=1|e=0|from=2|to=1336|frame=2|Fragment_1 - [Locus_19334_Transcript_1/1_Confidence_1.000_Length_1879|representative]	G3MTB2	Amblyomma maculatum PE	24	24	13	19
representative transcript|tr|L7M8E5|L7M8E5_9ACAR Putative 28s ribosomal protein OS=Rhipicephalus pulchellus PE=2 SV=1|e=0|from=57|to=1277|frame=-1|Fragment_1 - [Locus_11226_Transcript_1/1_Confidence_1.000_Length_1310|UNIGENE]	L7M8E5	Rhipicephalus pulchellus PE	24	30	13	18
transcript|tr|L7M277|L7M277_9ACAR Uncharacterized protein OS=Rhipicephalus pulchellus PE=2 SV=1|e=0|from=608|to=2842|frame=2|Fragment_1 - [Locus_2783_Transcript_2/2_Confidence_0.750_Length_2844|representative]	L7M277	Rhipicephalus pulchellus PE	19	31	14	22
transcript|tr|G0WV55|G0WV55_DERVA Alpha-catenin OS=Dermacentor variabilis PE=2 SV=1|e=0|from=986|to=2575|frame=-3|Fragment_1 - [Locus_2599_Transcript_1/1_Confidence_1.000_Length_2577|representative]	G0WV55	Dermacentor variabilis PE	14	18	19	17
representative transcript|tr|G3MMA7|G3MMA7_9ACAR Putative uncharacterized protein OS=Amblyomma maculatum PE=2 SV=1|e=0|from=46|to=1176|frame=-1|Fragment_1 - [Locus_4886_Transcript_1/2_Confidence_0.750_Length_1176|UNIGENE]	G3MMA7	Amblyomma maculatum PE	11	15	13	17
representative transcript|tr|G3MP79|G3MP79_9ACAR Putative uncharacterized protein OS=Amblyomma maculatum PE=2 SV=1|e=0|from=1|to=1974|frame=1|Fragment_1 - [Locus_5308_Transcript_1/1_Confidence_1.000_Length_2019|UNIGENE]	G3MP79	Amblyomma maculatum PE	27	18	13	17
transcript|tr|L7M0L3|L7M0L3_9ACAR Putative 26s proteasome regulatory complex subunit rpn3/psmd3 OS=Rhipicephalus pulchellus PE=2 SV=1|e=0|from=80|to=1447|frame=2|Fragment_2 - [Locus_869_Transcript_1/1_Confidence_1.000_Length_1604|representative]	L7M0L3	Rhipicephalus pulchellus PE	11	17	13	16
representative transcript|tr|L7M219|L7M219_9ACAR Uncharacterized protein OS=Rhipicephalus pulchellus PE=2 SV=1|e=1.1223E-107|from=5|to=601|frame=2|Fragment_1 - [Locus_3014_Transcript_1/1_Confidence_1.000_Length_664|UNIGENE]	L7M219	Rhipicephalus pulchellus PE	11	22	17	17
transcript|tr|L7M842|L7M842_9ACAR Putative salivary ecto-5'-nucleotidase/apyrase OS=Rhipicephalus pulchellus PE=2 SV=1|e=0|from=2105|to=3853|frame=-1|Fragment_2 - [Locus_10795_Transcript_1/1_Confidence_1.000_Length_3973|representative]	L7M842	Rhipicephalus pulchellus PE	0	17	14	15
representative transcript|tr|L7LXT0|L7LXT0_9ACAR Putative n-myristoyl transferase OS=Rhipicephalus pulchellus PE=2 SV=1|e=0|from=203|to=1630|frame=2|Fragment_2 - [Locus_5916_Transcript_1/2_Confidence_0.750_Length_2360|UNIGENE]	L7LXT0	Rhipicephalus pulchellus PE	14	11	11	18
representative transcript|tr|L7MB07|L7MB07_9ACAR Putative cytochrome c oxidase assembly protein OS=Rhipicephalus pulchellus PE=2 SV=1|e=9.36008E-63|from=71|to=520|frame=-1|Fragment_1 - [Locus_21122_Transcript_1/1_Confidence_1.000_Length_520|UNIGENE]	L7MB07	Rhipicephalus pulchellus PE	5	14	13	16
representative transcript|tr|L7LXL6|L7LXL6_9ACAR Putative a-kinase anchor protein 9 OS=Rhipicephalus pulchellus PE=2 SV=1|e=6.77298E-65|from=2|to=520|frame=-3|Fragment_1 - [Locus_9136_Transcript_1/1_Confidence_1.000_Length_564|UNIGENE]	L7LXL6	Rhipicephalus pulchellus PE	27	35	10	15
representative transcript|tr|L7MGQ3|L7MGQ3_9ACAR Putative maltase glucoamylase (Fragment) OS=Rhipicephalus pulchellus PE=2 SV=1|e=0|from=1|to=2622|frame=1|Fragment_2 - [Locus_1126_Transcript_1/2_Confidence_0.667_Length_2903|UNIGENE]	L7MGQ3	Rhipicephalus pulchellus PE	14	21	11	14
representative transcript|tr|L7LZ33|L7LZ33_9ACAR Putative vesicle coat complex copi beta subunit OS=Rhipicephalus pulchellus PE=2 SV=1|e=0|from=59|to=1150|frame=2|Fragment_1 - [Locus_3622_Transcript_1/2_Confidence_0.667_Length_1151|UNIGENE]	L7LZ33	Rhipicephalus pulchellus PE	18	25	15	31
transcript|tr|L7MKF1|L7MKF1_9ACAR Putative vacuolar assembly/sorting protein vps16 (Fragment) OS=Rhipicephalus pulchellus PE=2 SV=1|e=0|from=76|to=2292|frame=-3|Fragment_2 - [Locus_1327_Transcript_1/2_Confidence_0.750_Length_2294|representative]	L7MKF1	Rhipicephalus pulchellus PE	8	14	11	16
transcript|tr|L7M330|L7M330_9ACAR Putative heat shock-related protein OS=Rhipicephalus pulchellus PE=2 SV=1|e=4.61937E-92|from=5|to=544|frame=-3|Fragment_1 - [Locus_7288_Transcript_2/2_Confidence_0.667_Length_633|representative]	L7M330	Rhipicephalus pulchellus PE	22	22	11	23
representative transcript|tr|Q9NB96|Q9NB96_BOOMI P450 CYP319A1 OS=Boophilus microplus GN=CYP319A1 PE=2 SV=1|e=0|from=1|to=1545|frame=-1|Fragment_1 - [Locus_2426_Transcript_1/1_Confidence_1.000_Length_1584|UNIGENE]	Q9NB96	Boophilus microplus GN	16	21	10	28
representative transcript|"tr|B7QA86|B7QA86_IXOSC Cytochrome P450, putative (Fragment) OS=Ixodes scapularis GN=IscW_ISCW022077 PE=3 SV=1"|e=3.7569E-161|from=37|to=1446|frame=-2|Fragment_1 - [Locus_3771_Transcript_3/7_Confidence_0.632_Length_1756|UNIGENE]	B7QA86	Ixodes scapularis GN	14	18	9	16
representative transcript|tr|L7M1D8|L7M1D8_9ACAR Putative mitochondrial/chloroplast ribosomal protein l24 OS=Rhipicephalus pulchellus PE=2 SV=1|e=2.2235E-113|from=3|to=611|frame=3|Fragment_1 - [Locus_10759_Transcript_1/2_Confidence_0.667_Length_649|UNIGEN	L7M1D8	Rhipicephalus pulchellus PE	17	16	11	18
representative transcript|tr|L7LVN8|L7LVN8_9ACAR Putative apoptosis inhibitor 5/fibroblast growth factor 2-interacting factor 2 OS=Rhipicephalus pulchellus PE=2 SV=1|e=9.3636E-99|from=3|to=563|frame=3|Fragment_1 - [Locus_7438_Transcript_1/1_Confidence_1.0	L7LVN8	Rhipicephalus pulchellus PE	17	12	8	16
representative transcript|tr|L7M8K0|L7M8K0_9ACAR Putative dehydrogenase OS=Rhipicephalus pulchellus PE=2 SV=1|e=9.6637E-180|from=183|to=1157|frame=3|Fragment_2 - [Locus_1573_Transcript_3/4_Confidence_0.667_Length_1309|UNIGENE]	L7M8K0	Rhipicephalus pulchellus PE	0	8	8	18
Putative uncharacterized protein OS=Ixodes scapularis GN=IscW_ISCW011070 PE=4 SV=1|e=5.13858E-16|from=7|to=282|frame=1|Fragment_1 - [Locus_7411_Transcript_2/2_Confidence_0.750_Length_611|.|tr|B7Q412|B7Q412_IXOSC]	B7Q412	Ixodes scapularis GN	10	14	11	33
representative transcript|tr|L7MDP4|L7MDP4_9ACAR Putative nad/fad-utilizing protein possibly involved in translation (Fragment) OS=Rhipicephalus pulchellus PE=2 SV=1|e=0|from=2|to=1291|frame=2|Fragment_2 - [Locus_15024_Transcript_1/1_Confidence_1.000_Leng	L7MDP4	Rhipicephalus pulchellus PE	2	4	15	23
transcript|tr|L7M7I3|L7M7I3_9ACAR Putative kinase-like protein OS=Rhipicephalus pulchellus PE=2 SV=1|e=0|from=2|to=1951|frame=2|Fragment_5 - [Locus_10748_Transcript_1/1_Confidence_1.000_Length_1951|representative]	L7M7I3	Rhipicephalus pulchellus PE	25	30	8	31
transcript|tr|G3MMJ2|G3MMJ2_9ACAR Putative uncharacterized protein OS=Amblyomma maculatum PE=2 SV=1|e=5.04492E-71|from=47|to=565|frame=2|Fragment_1 - [Locus_2937_Transcript_1/1_Confidence_1.000_Length_1859|representative]	G3MMJ2	Amblyomma maculatum PE	23	23	9	18
representative transcript|"tr|B7PA01|B7PA01_IXOSC ATP-dependent RNA helicase, putative OS=Ixodes scapularis GN=IscW_ISCW002701 PE=4 SV=1"|e=0|from=1419|to=2750|frame=-3|Fragment_1 - [Locus_634_Transcript_1/1_Confidence_1.000_Length_2929|UNIGENE]	B7PA01	Ixodes scapularis GN	0	19	9	18
representative transcript|tr|L7MKP8|L7MKP8_9ACAR Putative acyl-coenzyme a thioesterase 9 mitochondrial (Fragment) OS=Rhipicephalus pulchellus PE=2 SV=1|e=0|from=28|to=1488|frame=1|Fragment_1 - [Locus_7449_Transcript_1/2_Confidence_0.750_Length_1491|UNIGEN	L7MKP8	Rhipicephalus pulchellus PE	15	21	10	16
representative transcript|tr|L7MD05|L7MD05_9ACAR Uncharacterized protein (Fragment) OS=Rhipicephalus pulchellus PE=2 SV=1|e=0|from=2|to=1633|frame=2|Fragment_1 - [Locus_9574_Transcript_1/1_Confidence_1.000_Length_1698|UNIGENE]	L7MD05	Rhipicephalus pulchellus PE	0	12	8	16
representative transcript|tr|Q8SXH3|Q8SXH3_DROME RE50350p OS=Drosophila melanogaster GN=eIF4AIII PE=2 SV=1|e=0|from=98|to=1270|frame=2|Fragment_1 - [Locus_3767_Transcript_1/1_Confidence_1.000_Length_1363|UNIGENE]	Q8SXH3	Drosophila melanogaster GN	8	14	8	20
representative transcript|tr|L7M4G3|L7M4G3_9ACAR Uncharacterized protein OS=Rhipicephalus pulchellus PE=2 SV=1|e=6.6387E-162|from=59|to=973|frame=2|Fragment_1 - [Locus_6538_Transcript_1/1_Confidence_1.000_Length_1026|UNIGENE]	L7M4G3	Rhipicephalus pulchellus PE	24	21	14	23
transcript|tr|L7M4H6|L7M4H6_9ACAR Putative sorting nexin OS=Rhipicephalus pulchellus PE=2 SV=1|e=0|from=222|to=1892|frame=3|Fragment_4 - [Locus_7062_Transcript_1/3_Confidence_0.667_Length_2759|representative]	L7M4H6	Rhipicephalus pulchellus PE	6	13	7	26
representative transcript|tr|L7LXA4|L7LXA4_9ACAR Putative staufen rna binding protein log 2 OS=Rhipicephalus pulchellus PE=2 SV=1|e=0|from=226|to=2118|frame=1|Fragment_5 - [Locus_2674_Transcript_1/5_Confidence_0.692_Length_2120|UNIGENE]	L7LXA4	Rhipicephalus pulchellus PE	31	12	8	23
representative transcript|"tr|B7PYZ6|B7PYZ6_IXOSC Eukaryotic translation initiation factor 3 subunit, putative OS=Ixodes scapularis GN=IscW_ISCW009510 PE=4 SV=1"|e=0|from=209|to=1684|frame=2|Fragment_2 - [Locus_1832_Transcript_1/1_Confidence_1.000_Length_	B7PYZ6	Ixodes scapularis GN	10	10	7	16
transcript|tr|L7MEM0|L7MEM0_9ACAR Putative cold shock domain protein (Fragment) OS=Rhipicephalus pulchellus PE=2 SV=1|e=0|from=1|to=1797|frame=1|Fragment_4 - [Locus_1014_Transcript_1/8_Confidence_0.682_Length_4096|representative]	L7MEM0	Rhipicephalus pulchellus PE	20	11	12	26
transcript|tr|L7MEK8|L7MEK8_9ACAR Putative mrna splicing factor atp-dependent rna helicase (Fragment) OS=Rhipicephalus pulchellus PE=2 SV=1|e=7.29516E-80|from=2|to=556|frame=2|Fragment_3 - [Locus_14350_Transcript_1/1_Confidence_1.000_Length_558|representa	L7MEK8	Rhipicephalus pulchellus PE	17	29	6	14
representative transcript|tr|G3MH46|G3MH46_9ACAR Putative uncharacterized protein (Fragment) OS=Amblyomma maculatum PE=2 SV=1|e=0|from=16|to=1098|frame=1|Fragment_1 - [Locus_2275_Transcript_1/1_Confidence_1.000_Length_3684|UNIGENE]	G3MH46	Amblyomma maculatum PE	16	26	7	24
transcript|tr|L7M528|L7M528_9ACAR Putative paramyosin OS=Rhipicephalus pulchellus PE=2 SV=1|e=0|from=1|to=1989|frame=1|Fragment_1 - [Locus_1519_Transcript_1/3_Confidence_0.714_Length_3034|representative]	L7M528	Rhipicephalus pulchellus PE	12	20	7	15
representative transcript|tr|L7ME88|L7ME88_9ACAR Putative nuclear exosomal rna helicase mtr4 dead-box superfamily (Fragment) OS=Rhipicephalus pulchellus PE=2 SV=1|e=3.1648E-95|from=2|to=601|frame=2|Fragment_2 - [Locus_6611_Transcript_1/1_Confidence_1.000_	L7ME88	Rhipicephalus pulchellus PE	17	21	7	19
representative transcript|tr|B7PJJ6|B7PJJ6_IXOSC Putative uncharacterized protein OS=Ixodes scapularis GN=IscW_ISCW005185 PE=4 SV=1|e=1.381E-13|from=132|to=302|frame=3|Fragment_1 - [Locus_5621_Transcript_2/2_Confidence_0.500_Length_407|UNIGENE]	B7PJJ6	Ixodes scapularis GN	12	12	9	23
representative transcript|tr|L7M583|L7M583_9ACAR Putative heat shock protein OS=Rhipicephalus pulchellus PE=2 SV=1|e=4.36624E-49|from=2|to=280|frame=-1|Fragment_1 - [Locus_15967_Transcript_1/1_Confidence_1.000_Length_280|UNIGENE]	L7M583	Rhipicephalus pulchellus PE	0	8	11	16
representative transcript|"tr|B7QIP4|B7QIP4_IXOSC 4SNc-Tudor domain protein, putative OS=Ixodes scapularis GN=IscW_ISCW014289 PE=4 SV=1"|e=0|from=1088|to=3721|frame=-1|Fragment_7 - [Locus_1689_Transcript_1/1_Confidence_1.000_Length_4018|UNIGENE]	B7QIP4	Ixodes scapularis GN	0	1	11	33
representative transcript|tr|L7M8G2|L7M8G2_9ACAR Putative kazal type serine protease inhibitor OS=Rhipicephalus pulchellus PE=2 SV=1|e=7.66E-136|from=2|to=679|frame=-3|Fragment_1 - [Locus_2309_Transcript_1/2_Confidence_0.800_Length_681|UNIGENE]	L7M8G2	Rhipicephalus pulchellus PE	19	14	6	15
representative transcript|tr|L7MMF8|L7MMF8_9ACAR Putative heat shock protein 70 (Fragment) OS=Rhipicephalus pulchellus PE=2 SV=1|e=1.9378E-82|from=2|to=538|frame=2|Fragment_3 - [Locus_4259_Transcript_1/1_Confidence_1.000_Length_747|UNIGENE]	L7MMF8	Rhipicephalus pulchellus PE	23	34	5	28
representative transcript|tr|G3MIV5|G3MIV5_9ACAR Putative uncharacterized protein (Fragment) OS=Amblyomma maculatum PE=2 SV=1|e=4.63571E-30|from=2|to=355|frame=-2|Fragment_2 - [Locus_9716_Transcript_2/2_Confidence_0.875_Length_365|UNIGENE]	G3MIV5	Amblyomma maculatum PE	8	6	6	16
transcript|tr|L7LSU2|L7LSU2_9ACAR Putative tick transposon OS=Rhipicephalus pulchellus PE=2 SV=1|e=5.79214E-32|from=2|to=652|frame=2|Fragment_2 - [Locus_10875_Transcript_1/1_Confidence_1.000_Length_660|representative]	L7LSU2	Rhipicephalus pulchellus PE	13	9	6	16
Putative uncharacterized protein (Fragment) OS=Amblyomma maculatum PE=2 SV=1|e=9.30693E-87|from=686|to=841|frame=2|Fragment_1 - [Locus_8963_Transcript_1/1_Confidence_1.000_Length_841|.|tr|G3MHH9|G3MHH9_9ACAR]	G3MHH9	Amblyomma maculatum PE	23	39	9	21
transcript|"tr|B7P7X8|B7P7X8_IXOSC Peroxidase, putative (Fragment) OS=Ixodes scapularis GN=IscW_ISCW017070 PE=4 SV=1"|e=0|from=4645|to=7110|frame=-2|Fragment_4 - [Locus_971_Transcript_12/21_Confidence_0.641_Length_7111|representative]	B7P7X8	Ixodes scapularis GN	21	20	4	17
representative transcript|tr|L7M117|L7M117_9ACAR Uncharacterized protein OS=Rhipicephalus pulchellus PE=2 SV=1|e=2.2738E-20|from=3|to=212|frame=3|Fragment_2 - [Locus_4010_Transcript_1/2_Confidence_0.667_Length_1432|UNIGENE]	L7M117	Rhipicephalus pulchellus PE	2	10	4	17
representative transcript|tr|L7MEK8|L7MEK8_9ACAR Putative mrna splicing factor atp-dependent rna helicase (Fragment) OS=Rhipicephalus pulchellus PE=2 SV=1|e=6.55601E-61|from=3|to=350|frame=-3|Fragment_1 - [Locus_22098_Transcript_1/1_Confidence_1.000_Lengt	L7MEK8	Rhipicephalus pulchellus PE	9	0	4	17
representative transcript|tr|L7M3P6|L7M3P6_9ACAR Putative molybdopterin converting factor subunit 2 OS=Rhipicephalus pulchellus PE=2 SV=1|e=4.38649E-59|from=890|to=1327|frame=-1|Fragment_1 - [Locus_8884_Transcript_1/1_Confidence_1.000_Length_1468|UNIGENE]	L7M3P6	Rhipicephalus pulchellus PE	6	11	8	21
transcript|tr|L7LXL1|L7LXL1_9ACAR Putative translational activator gcn1 translational activator gcn1 OS=Rhipicephalus pulchellus PE=2 SV=1|e=5.8026E-101|from=3|to=560|frame=3|Fragment_1 - [Locus_9481_Transcript_1/1_Confidence_1.000_Length_562|representati	L7LXL1	Rhipicephalus pulchellus PE	4	21	3	20
representative transcript|tr|L7LS00|L7LS00_9ACAR Putative conserved secreted protein OS=Rhipicephalus pulchellus PE=2 SV=1|e=6.0788E-101|from=49|to=675|frame=-1|Fragment_1 - [Locus_13792_Transcript_1/1_Confidence_1.000_Length_675|UNIGENE]	L7LS00	Rhipicephalus pulchellus PE	7	23	2	23
transcript|tr|G3MPP4|G3MPP4_9ACAR Putative uncharacterized protein OS=Amblyomma maculatum PE=2 SV=1|e=0|from=1|to=1242|frame=1|Fragment_2 - [Locus_1891_Transcript_3/3_Confidence_0.600_Length_3696|representative]	G3MPP4	Amblyomma maculatum PE	21	18	4	21
representative transcript|tr|L7LWE0|L7LWE0_9ACAR Putative vacuolar protein sorting 13 OS=Rhipicephalus pulchellus PE=2 SV=1|e=6.71158E-73|from=1|to=432|frame=-1|Fragment_1 - [Locus_8078_Transcript_1/1_Confidence_1.000_Length_432|UNIGENE]	L7LWE0	Rhipicephalus pulchellus PE	18	27	0	14
transcript|tr|L7M8D8|L7M8D8_9ACAR Putative succinate dehydrogenase fe-s protein subunit OS=Rhipicephalus pulchellus PE=2 SV=1|e=9.48E-147|from=69|to=806|frame=3|Fragment_1 - [Locus_2986_Transcript_2/3_Confidence_0.333_Length_964|representative]	L7M8D8	Rhipicephalus pulchellus PE	32	23	0	17
representative transcript|tr|L7MI62|L7MI62_9ACAR Putative carboxyl transferase domain protein (Fragment) OS=Rhipicephalus pulchellus PE=2 SV=1|e=0|from=3|to=1073|frame=3|Fragment_1 - [Locus_7525_Transcript_1/1_Confidence_1.000_Length_1073|UNIGENE]	L7MI62	Rhipicephalus pulchellus PE	12	16	0	15
transcript|tr|L7M5Q5|L7M5Q5_9ACAR Putative scavenger receptor class a-like c-type lectin OS=Rhipicephalus pulchellus PE=2 SV=1|e=1.6428E-119|from=3|to=659|frame=3|Fragment_1 - [Locus_3999_Transcript_1/1_Confidence_1.000_Length_660|representative]	L7M5Q5	Rhipicephalus pulchellus PE	10	20	0	25
transcript|tr|L7LZ25|L7LZ25_9ACAR Putative vesicle coat complex copii subunit sfb3 OS=Rhipicephalus pulchellus PE=2 SV=1|e=0|from=165|to=3698|frame=3|Fragment_8 - [Locus_3639_Transcript_1/2_Confidence_0.750_Length_5140|representative]	L7LZ25	Rhipicephalus pulchellus PE	17	22	0	16
representative transcript|tr|G3MQ37|G3MQ37_9ACAR Putative uncharacterized protein OS=Amblyomma maculatum PE=2 SV=1|e=3.0733E-107|from=907|to=1497|frame=-2|Fragment_1 - [Locus_3056_Transcript_1/1_Confidence_1.000_Length_1723|UNIGENE]	G3MQ37	Amblyomma maculatum PE	12	15	0	16
transcript|"tr|B7P5B1|B7P5B1_IXOSC MUC5AC protein, putative OS=Ixodes scapularis GN=IscW_ISCW015780 PE=4 SV=1"|e=2.129E-100|from=2|to=760|frame=2|Fragment_1 - [Locus_16175_Transcript_1/1_Confidence_1.000_Length_762|representative]	B7P5B1	Ixodes scapularis GN	16	15	0	20
transcript|tr|L7LYJ0|L7LYJ0_9ACAR Putative peptidyl-prolyl cis-trans isomerase fkbp6 OS=Rhipicephalus pulchellus PE=2 SV=1|e=6.72912E-61|from=3|to=410|frame=-2|Fragment_1 - [Locus_16419_Transcript_1/1_Confidence_1.000_Length_411|representative]	L7LYJ0	Rhipicephalus pulchellus PE	25	12	0	26
representative transcript|tr|L7MAW1|L7MAW1_9ACAR Putative tick transposon (Fragment) OS=Rhipicephalus pulchellus PE=2 SV=1|e=2.69799E-13|from=212|to=382|frame=-3|Fragment_3 - [Locus_4542_Transcript_1/1_Confidence_1.000_Length_384|UNIGENE]	L7MAW1	Rhipicephalus pulchellus PE	11	6	0	24
transcript|tr|L7M6R4|L7M6R4_9ACAR Putative mediator of rna polymerase ii transcription subunit 24-like protein OS=Rhipicephalus pulchellus PE=2 SV=1|e=4.23794E-85|from=1|to=474|frame=1|Fragment_1 - [Locus_22747_Transcript_1/1_Confidence_1.000_Length_475|r	L7M6R4	Rhipicephalus pulchellus PE	3	6	0	17
transcript|tr|L7M0C8|L7M0C8_9ACAR Putative glycosyl hydrolase family 47 OS=Rhipicephalus pulchellus PE=2 SV=1|e=0|from=181|to=1806|frame=1|Fragment_3 - [Locus_11521_Transcript_1/1_Confidence_1.000_Length_1881|representative]	L7M0C8	Rhipicephalus pulchellus PE	9	9	0	22
representative transcript|tr|G3MNR3|G3MNR3_9ACAR Putative uncharacterized protein OS=Amblyomma maculatum PE=2 SV=1|e=0|from=137|to=1369|frame=2|Fragment_1 - [Locus_3681_Transcript_1/2_Confidence_0.667_Length_1542|UNIGENE]	G3MNR3	Amblyomma maculatum PE	19	0	0	16
representative transcript|tr|L7MAY8|L7MAY8_9ACAR Putative pyruvate dehydrogenase e1 alpha subunit OS=Rhipicephalus pulchellus PE=2 SV=1|e=0|from=297|to=1484|frame=-3|Fragment_1 - [Locus_2111_Transcript_1/4_Confidence_0.625_Length_1627|UNIGENE]	L7MAY8	Rhipicephalus pulchellus PE	12	0	0	15
transcript|tr|A3RI53|A3RI53_BOOMI Glucose-6-phosphate 1-dehydrogenase OS=Boophilus microplus GN=G6PDH PE=2 SV=2|e=0|from=205|to=1725|frame=1|Fragment_1 - [Locus_796_Transcript_1/5_Confidence_0.667_Length_1852|representative]	A3RI53	Boophilus microplus GN	0	0	0	15
transcript|tr|L7MM50|L7MM50_9ACAR Putative zinc carboxypeptidase (Fragment) OS=Rhipicephalus pulchellus PE=2 SV=1|e=0|from=19|to=2970|frame=1|Fragment_1 - [Locus_420_Transcript_1/1_Confidence_1.000_Length_2971|representative]	L7MM50	Rhipicephalus pulchellus PE	34	45	27	19
Putative uncharacterized protein OS=Ixodes scapularis GN=IscW_ISCW009032 PE=4 SV=1|e=6.4692E-126|from=12219|to=13058|frame=-1|Fragment_1 - [Locus_100_Transcript_20/21_Confidence_0.667_Length_13058|.|tr|B7Q381|B7Q381_IXOSC]	B7Q381	Ixodes scapularis GN	29	38	23	16
transcript|"tr|B7PN37|B7PN37_IXOSC Cytochrome P450, putative (Fragment) OS=Ixodes scapularis GN=IscW_ISCW005544 PE=3 SV=1"|e=6.58182E-90|from=36|to=1004|frame=-3|Fragment_2 - [Locus_12220_Transcript_1/1_Confidence_1.000_Length_1006|representative]	B7PN37	Ixodes scapularis GN	40	52	26	32
transcript|tr|L7M947|L7M947_9ACAR Putative myosin class v heavy chain OS=Rhipicephalus pulchellus PE=2 SV=1|e=0|from=2|to=937|frame=-1|Fragment_1 - [Locus_10163_Transcript_1/1_Confidence_1.000_Length_937|representative]	L7M947	Rhipicephalus pulchellus PE	22	17	20	16
transcript|tr|L7M2E1|L7M2E1_9ACAR Putative chromatin remodeling protein harp/smarcal1 dead-box superfamily OS=Rhipicephalus pulchellus PE=2 SV=1|e=4.40392E-46|from=2|to=370|frame=-2|Fragment_1 - [Locus_17216_Transcript_1/1_Confidence_1.000_Length_446|repr	L7M2E1	Rhipicephalus pulchellus PE	20	14	15	16
representative transcript|tr|L7MA51|L7MA51_9ACAR Uncharacterized protein (Fragment) OS=Rhipicephalus pulchellus PE=2 SV=1|e=1.31681E-79|from=492|to=1451|frame=-3|Fragment_1 - [Locus_3527_Transcript_9/12_Confidence_0.281_Length_1852|UNIGENE]	L7MA51	Rhipicephalus pulchellus PE	10	25	23	29
representative transcript|tr|L7M6W4|L7M6W4_9ACAR Putative 60 kDa heat shock protein OS=Rhipicephalus pulchellus PE=2 SV=1|e=0|from=766|to=2415|frame=-2|Fragment_1 - [Locus_314_Transcript_1/1_Confidence_1.000_Length_2416|UNIGENE]	L7M6W4	Rhipicephalus pulchellus PE	13	26	19	14
representative transcript|tr|G3MLX1|G3MLX1_9ACAR Putative uncharacterized protein OS=Amblyomma maculatum PE=2 SV=1|e=0|from=222|to=1286|frame=-2|Fragment_2 - [Locus_366_Transcript_1/7_Confidence_0.529_Length_1395|UNIGENE]	G3MLX1	Amblyomma maculatum PE	15	28	25	22
representative transcript|tr|G3MQ20|G3MQ20_9ACAR Putative uncharacterized protein OS=Amblyomma maculatum PE=2 SV=1|e=0|from=17|to=1231|frame=2|Fragment_1 - [Locus_1032_Transcript_2/4_Confidence_0.667_Length_1865|UNIGENE]	G3MQ20	Amblyomma maculatum PE	25	14	19	13
representative transcript|tr|G3MRM3|G3MRM3_9ACAR ATP synthase gamma chain OS=Amblyomma maculatum PE=2 SV=1|e=1.2563E-153|from=71|to=949|frame=2|Fragment_1 - [Locus_3272_Transcript_1/2_Confidence_0.750_Length_1110|UNIGENE]	G3MRM3	Amblyomma maculatum PE	16	16	15	18
transcript|tr|G3MKA4|G3MKA4_9ACAR Putative uncharacterized protein OS=Amblyomma maculatum PE=2 SV=1|e=4.326E-135|from=2|to=799|frame=-3|Fragment_1 - [Locus_11973_Transcript_1/3_Confidence_0.714_Length_882|representative]	G3MKA4	Amblyomma maculatum PE	24	30	19	19
transcript|tr|L7MKP4|L7MKP4_9ACAR Putative intracellular membrane-bound ca2+-independent phospholipase a2 (Fragment) OS=Rhipicephalus pulchellus PE=2 SV=1|e=0|from=609|to=2636|frame=-3|Fragment_2 - [Locus_2283_Transcript_3/5_Confidence_0.667_Length_2782|r	L7MKP4	Rhipicephalus pulchellus PE	26	21	19	38
representative transcript|tr|L7MCP3|L7MCP3_9ACAR Putative abc transporter c family protein (Fragment) OS=Rhipicephalus pulchellus PE=2 SV=1|e=7.4449E-159|from=3|to=1676|frame=-3|Fragment_4 - [Locus_2497_Transcript_2/4_Confidence_0.625_Length_1678|UNIGENE]	L7MCP3	Rhipicephalus pulchellus PE	16	19	21	18
representative transcript|tr|G3MRB1|G3MRB1_9ACAR Putative uncharacterized protein OS=Amblyomma maculatum PE=2 SV=1|e=0|from=31|to=1887|frame=1|Fragment_1 - [Locus_14391_Transcript_1/1_Confidence_1.000_Length_2431|UNIGENE]	G3MRB1	Amblyomma maculatum PE	16	23	18	21
representative transcript|tr|L7MGQ7|L7MGQ7_9ACAR Putative ribose 5-phosphate isomerase (Fragment) OS=Rhipicephalus pulchellus PE=2 SV=1|e=2.7384E-153|from=14|to=871|frame=2|Fragment_1 - [Locus_1582_Transcript_1/1_Confidence_1.000_Length_1086|UNIGENE]	L7MGQ7	Rhipicephalus pulchellus PE	16	24	23	74
transcript|tr|L7M8Y8|L7M8Y8_9ACAR Putative e3 ubiquitin-protein ligase ubr4 OS=Rhipicephalus pulchellus PE=2 SV=1|e=1.99439E-74|from=1|to=378|frame=1|Fragment_1 - [Locus_16343_Transcript_1/1_Confidence_1.000_Length_379|representative]	L7M8Y8	Rhipicephalus pulchellus PE	24	10	16	17
transcript|tr|L7LWV3|L7LWV3_9ACAR Putative atp-dependent rna helicase OS=Rhipicephalus pulchellus PE=2 SV=1|e=0|from=8|to=1471|frame=-3|Fragment_2 - [Locus_12540_Transcript_1/1_Confidence_1.000_Length_1473|representative]	L7LWV3	Rhipicephalus pulchellus PE	20	0	15	21
representative transcript|"tr|B7Q9G1|B7Q9G1_IXOSC Acyl-CoA reductase, putative (Fragment) OS=Ixodes scapularis GN=IscW_ISCW021430 PE=4 SV=1"|e=7.7679E-130|from=143|to=1513|frame=2|Fragment_4 - [Locus_11046_Transcript_1/2_Confidence_0.667_Length_1781|UNIGE	B7Q9G1	Ixodes scapularis GN	8	39	13	16
representative transcript|tr|L7M2H8|L7M2H8_9ACAR Putative calcium-transporting atpase sarcoplasmic/endoplasmic reticulum type calcium pump isoform 1 OS=Rhipicephalus pulchellus PE=2 SV=1|e=4.34036E-33|from=3|to=200|frame=3|Fragment_1 - [Locus_601_Transcri	L7M2H8	Rhipicephalus pulchellus PE	25	32	16	20
representative transcript|tr|L7MEC2|L7MEC2_9ACAR Uncharacterized protein (Fragment) OS=Rhipicephalus pulchellus PE=2 SV=1|e=1.72318E-21|from=2|to=193|frame=-3|Fragment_1 - [Locus_566_Transcript_4/16_Confidence_1.000_Length_195|UNIGENE]	L7MEC2	Rhipicephalus pulchellus PE	17	30	13	17
transcript|tr|G3MPH0|G3MPH0_9ACAR Putative uncharacterized protein OS=Amblyomma maculatum PE=2 SV=1|e=1.59202E-92|from=35|to=634|frame=2|Fragment_3 - [Locus_14490_Transcript_1/1_Confidence_1.000_Length_750|representative]	G3MPH0	Amblyomma maculatum PE	15	26	16	17
representative transcript|tr|L7M761|L7M761_9ACAR Putative hydroxysteroid 17-beta dehydrogenase 4 OS=Rhipicephalus pulchellus PE=2 SV=1|e=0|from=1|to=2484|frame=-3|Fragment_5 - [Locus_1704_Transcript_1/2_Confidence_0.750_Length_2486|UNIGENE]	L7M761	Rhipicephalus pulchellus PE	20	11	18	16
transcript|tr|L7M7M9|L7M7M9_9ACAR Putative tousled-like protein kinase OS=Rhipicephalus pulchellus PE=2 SV=1|e=0|from=387|to=2228|frame=-2|Fragment_2 - [Locus_991_Transcript_1/9_Confidence_0.571_Length_2229|representative]	L7M7M9	Rhipicephalus pulchellus PE	32	41	15	13
representative transcript|tr|L7M632|L7M632_9ACAR Uncharacterized protein OS=Rhipicephalus pulchellus PE=2 SV=1|e=4.9008E-162|from=2|to=868|frame=2|Fragment_1 - [Locus_7704_Transcript_1/1_Confidence_1.000_Length_1516|UNIGENE]	L7M632	Rhipicephalus pulchellus PE	26	39	17	14
transcript|tr|L7M0S9|L7M0S9_9ACAR Putative e3 ubiquitin-protein ligase makorin-1 OS=Rhipicephalus pulchellus PE=2 SV=1|e=0|from=197|to=1489|frame=2|Fragment_1 - [Locus_13695_Transcript_1/2_Confidence_0.750_Length_1559|representative]	L7M0S9	Rhipicephalus pulchellus PE	12	35	18	35
representative transcript|tr|L7MAV9|L7MAV9_9ACAR Putative n-acetylglucosaminyltransferase i OS=Rhipicephalus pulchellus PE=2 SV=1|e=0|from=913|to=2184|frame=-1|Fragment_3 - [Locus_4335_Transcript_1/2_Confidence_0.750_Length_2385|UNIGENE]	L7MAV9	Rhipicephalus pulchellus PE	9	19	18	13
transcript|tr|G3MNV4|G3MNV4_9ACAR Putative uncharacterized protein OS=Amblyomma maculatum PE=2 SV=1|e=3.83317E-43|from=50|to=466|frame=2|Fragment_1 - [Locus_23345_Transcript_1/1_Confidence_1.000_Length_467|representative]	G3MNV4	Amblyomma maculatum PE	8	23	16	29
representative transcript|tr|L7MA09|L7MA09_9ACAR Uncharacterized protein OS=Rhipicephalus pulchellus PE=2 SV=1|e=0|from=1|to=1173|frame=1|Fragment_2 - [Locus_2022_Transcript_1/2_Confidence_0.750_Length_1267|UNIGENE]	L7MA09	Rhipicephalus pulchellus PE	16	12	12	14
representative transcript|tr|C9W1P0|C9W1P0_RHISA Ribosomal protein L21 OS=Rhipicephalus sanguineus PE=2 SV=1|e=1.2207E-89|from=43|to=525|frame=-2|Fragment_1 - [Locus_988_Transcript_1/1_Confidence_1.000_Length_874|UNIGENE]	C9W1P0	Rhipicephalus sanguineus PE	9	15	11	16
representative transcript|"tr|B7QDY6|B7QDY6_IXOSC ATP-dependent RNA helicase, putative OS=Ixodes scapularis GN=IscW_ISCW022725 PE=3 SV=1"|e=1.6657E-180|from=144|to=2039|frame=3|Fragment_3 - [Locus_10139_Transcript_1/1_Confidence_1.000_Length_2274|UNIGENE]	B7QDY6	Ixodes scapularis GN	21	21	11	14
representative transcript|tr|G3MM27|G3MM27_9ACAR Putative uncharacterized protein OS=Amblyomma maculatum PE=2 SV=1|e=2.9276E-161|from=202|to=1047|frame=-2|Fragment_1 - [Locus_2600_Transcript_1/4_Confidence_0.667_Length_1147|UNIGENE]	G3MM27	Amblyomma maculatum PE	26	34	18	18
representative transcript|tr|L7LZ38|L7LZ38_9ACAR Putative histone acetyltransferase saga/ada catalytic subunit pcaf/gcn5 OS=Rhipicephalus pulchellus PE=2 SV=1|e=1.0215E-176|from=3|to=905|frame=3|Fragment_1 - [Locus_15531_Transcript_1/1_Confidence_1.000_Le	L7LZ38	Rhipicephalus pulchellus PE	33	29	14	28
transcript|tr|L7MEI8|L7MEI8_9ACAR Putative cytosol (Fragment) OS=Rhipicephalus pulchellus PE=2 SV=1|e=0|from=9|to=1034|frame=3|Fragment_1 - [Locus_6108_Transcript_1/1_Confidence_1.000_Length_1173|representative]	L7MEI8	Rhipicephalus pulchellus PE	20	26	13	20
transcript|tr|L7MMB8|L7MMB8_9ACAR Uncharacterized protein (Fragment) OS=Rhipicephalus pulchellus PE=2 SV=1|e=2.90003E-38|from=16|to=315|frame=-2|Fragment_2 - [Locus_10716_Transcript_1/1_Confidence_1.000_Length_694|representative]	L7MMB8	Rhipicephalus pulchellus PE	14	21	16	28
transcript|tr|L7M1Z0|L7M1Z0_9ACAR Putative ecdysone-induced protein 75b OS=Rhipicephalus pulchellus PE=2 SV=1|e=0|from=56|to=1645|frame=2|Fragment_1 - [Locus_3329_Transcript_1/1_Confidence_1.000_Length_1646|representative]	L7M1Z0	Rhipicephalus pulchellus PE	12	10	11	13
Kunitz-type serine protease inhibitor 6 (Fragment) OS=Boophilus microplus PE=1 SV=2|e=5.48397E-69|from=292|to=1053|frame=-2|Fragment_2 - [Locus_7_Transcript_3/8_Confidence_0.417_Length_1342|.|sp|P83606|BMTI6_BOOMI]	P83606	Boophilus microplus PE	21	22	19	22
representative transcript|tr|L7MF07|L7MF07_9ACAR Putative glutaryl-coa dehydrogenase (Fragment) OS=Rhipicephalus pulchellus PE=2 SV=1|e=0|from=152|to=1186|frame=2|Fragment_2 - [Locus_7265_Transcript_1/2_Confidence_0.750_Length_1188|UNIGENE]	L7MF07	Rhipicephalus pulchellus PE	0	20	16	20
representative transcript|tr|L7M739|L7M739_9ACAR Putative ribosome bioproteinsis protein OS=Rhipicephalus pulchellus PE=2 SV=1|e=3.90473E-40|from=3|to=455|frame=3|Fragment_1 - [Locus_15645_Transcript_1/1_Confidence_1.000_Length_466|UNIGENE]	L7M739	Rhipicephalus pulchellus PE	22	42	12	30
transcript|tr|L7MIE2|L7MIE2_9ACAR Putative nidogen (Fragment) OS=Rhipicephalus pulchellus PE=2 SV=1|e=5.8995E-99|from=1|to=507|frame=-2|Fragment_1 - [Locus_11435_Transcript_1/1_Confidence_1.000_Length_508|representative]	L7MIE2	Rhipicephalus pulchellus PE	31	34	10	44
transcript|tr|G3MKV9|G3MKV9_9ACAR Putative uncharacterized protein OS=Amblyomma maculatum PE=2 SV=1|e=0|from=160|to=1815|frame=1|Fragment_1 - [Locus_2420_Transcript_1/3_Confidence_0.667_Length_2133|representative]	G3MKV9	Amblyomma maculatum PE	12	22	12	13
representative transcript|tr|L7M526|L7M526_9ACAR Putative acyl-coa synthetase family member 3 mitochondrial OS=Rhipicephalus pulchellus PE=2 SV=1|e=0|from=2|to=1369|frame=2|Fragment_2 - [Locus_6536_Transcript_1/1_Confidence_1.000_Length_1489|UNIGENE]	L7M526	Rhipicephalus pulchellus PE	9	16	12	24
transcript|tr|G3MTB8|G3MTB8_9ACAR Putative uncharacterized protein OS=Amblyomma maculatum PE=2 SV=1|e=1.5855E-142|from=630|to=1460|frame=-2|Fragment_2 - [Locus_3463_Transcript_1/2_Confidence_0.750_Length_1611|representative]	G3MTB8	Amblyomma maculatum PE	12	14	16	15
representative transcript|tr|L7MJX9|L7MJX9_9ACAR Putative nad+ adp-ribosyltransferase-3-like protein strongylocentrotus purpuratus (Fragment) OS=Rhipicephalus pulchellus PE=2 SV=1|e=4.37217E-63|from=4|to=372|frame=-1|Fragment_1 - [Locus_11759_Transcript_1	L7MJX9	Rhipicephalus pulchellus PE	17	12	13	18
representative transcript|tr|L7M5M0|L7M5M0_9ACAR Uncharacterized protein OS=Rhipicephalus pulchellus PE=2 SV=1|e=4.71062E-84|from=3|to=518|frame=-1|Fragment_1 - [Locus_6868_Transcript_1/1_Confidence_1.000_Length_638|UNIGENE]	L7M5M0	Rhipicephalus pulchellus PE	13	12	13	26
transcript|"tr|B7P1Z7|B7P1Z7_IXOSC Chloride channel, putative (Fragment) OS=Ixodes scapularis GN=IscW_ISCW016088 PE=4 SV=1"|e=0|from=3|to=1664|frame=3|Fragment_5 - [Locus_3487_Transcript_1/6_Confidence_0.533_Length_2112|representative]	B7P1Z7	Ixodes scapularis GN	11	19	11	15
transcript|tr|L7M659|L7M659_9ACAR Putative vacuolar assembly/sorting protein OS=Rhipicephalus pulchellus PE=2 SV=1|e=0|from=100|to=2691|frame=-1|Fragment_2 - [Locus_3777_Transcript_1/2_Confidence_0.750_Length_3150|representative]	L7M659	Rhipicephalus pulchellus PE	9	2	10	21
transcript|tr|L7M9B2|L7M9B2_9ACAR Putative structural maintenance OS=Rhipicephalus pulchellus PE=2 SV=1|e=2.88E-178|from=2|to=952|frame=-1|Fragment_1 - [Locus_5589_Transcript_1/1_Confidence_1.000_Length_1003|representative]	L7M9B2	Rhipicephalus pulchellus PE	23	22	12	22
representative transcript|tr|L7MIL8|L7MIL8_9ACAR Putative vacuolar sorting protein vps45/stt10 sec1 family (Fragment) OS=Rhipicephalus pulchellus PE=2 SV=1|e=0|from=2|to=1198|frame=2|Fragment_1 - [Locus_4438_Transcript_1/1_Confidence_1.000_Length_1478|UNI	L7MIL8	Rhipicephalus pulchellus PE	12	19	11	17
transcript|tr|L7MIJ9|L7MIJ9_9ACAR Putative nuclear pore complex rnpl4 component sc npl4 (Fragment) OS=Rhipicephalus pulchellus PE=2 SV=1|e=0|from=538|to=2349|frame=-3|Fragment_3 - [Locus_1823_Transcript_1/1_Confidence_1.000_Length_2507|representative]	L7MIJ9	Rhipicephalus pulchellus PE	29	26	13	24
representative transcript|tr|L7M330|L7M330_9ACAR Putative heat shock-related protein OS=Rhipicephalus pulchellus PE=2 SV=1|e=8.55278E-79|from=120|to=578|frame=3|Fragment_1 - [Locus_1537_Transcript_1/1_Confidence_1.000_Length_580|UNIGENE]	L7M330	Rhipicephalus pulchellus PE	19	20	11	22
transcript|tr|L7LVR6|L7LVR6_9ACAR Putative tick transposon OS=Rhipicephalus pulchellus PE=2 SV=1|e=0|from=109|to=1761|frame=-3|Fragment_1 - [Locus_9942_Transcript_1/1_Confidence_1.000_Length_1763|representative]	L7LVR6	Rhipicephalus pulchellus PE	24	16	10	14
representative transcript|tr|Q4PMB2|Q4PMB2_IXOSC ADP/ATP translocase OS=Ixodes scapularis PE=2 SV=1|e=1.2885E-123|from=18|to=728|frame=3|Fragment_1 - [Locus_3526_Transcript_1/1_Confidence_1.000_Length_729|UNIGENE]	Q4PMB2	Ixodes scapularis PE	24	25	17	20
representative transcript|tr|L7M3G2|L7M3G2_9ACAR Putative dna replication licensing factor mcm5 component OS=Rhipicephalus pulchellus PE=2 SV=1|e=4.26058E-85|from=2|to=499|frame=2|Fragment_1 - [Locus_20717_Transcript_1/1_Confidence_1.000_Length_637|UNIGEN	L7M3G2	Rhipicephalus pulchellus PE	10	13	19	35
transcript|"tr|B7QA86|B7QA86_IXOSC Cytochrome P450, putative (Fragment) OS=Ixodes scapularis GN=IscW_ISCW022077 PE=3 SV=1"|e=1.2545E-161|from=270|to=1679|frame=3|Fragment_1 - [Locus_9469_Transcript_2/4_Confidence_0.667_Length_2156|representative]	B7QA86	Ixodes scapularis GN	11	0	9	15
transcript|tr|L7MHZ5|L7MHZ5_9ACAR Putative ubiquitin-specific protease ubp14 (Fragment) OS=Rhipicephalus pulchellus PE=2 SV=1|e=0|from=2|to=1444|frame=2|Fragment_1 - [Locus_5570_Transcript_1/1_Confidence_1.000_Length_1444|representative]	L7MHZ5	Rhipicephalus pulchellus PE	15	20	8	16
representative transcript|"tr|B7Q8E4|B7Q8E4_IXOSC Splicing factor 3A, putative OS=Ixodes scapularis GN=IscW_ISCW010835 PE=4 SV=1"|e=0|from=119|to=1603|frame=-3|Fragment_5 - [Locus_6742_Transcript_1/1_Confidence_1.000_Length_1674|UNIGENE]	B7Q8E4	Ixodes scapularis GN	22	23	7	18
representative transcript|tr|L7M7K4|L7M7K4_9ACAR Putative adhesion regulating molecule OS=Rhipicephalus pulchellus PE=2 SV=1|e=2.21265E-87|from=99|to=710|frame=3|Fragment_1 - [Locus_2441_Transcript_1/2_Confidence_0.750_Length_795|UNIGENE]	L7M7K4	Rhipicephalus pulchellus PE	14	21	9	18
representative transcript|tr|L7MAE1|L7MAE1_9ACAR Putative polymerase rna iii dna directed polypeptide c OS=Rhipicephalus pulchellus PE=2 SV=1|e=7.9268E-103|from=3|to=638|frame=3|Fragment_1 - [Locus_9033_Transcript_1/1_Confidence_1.000_Length_648|UNIGENE]	L7MAE1	Rhipicephalus pulchellus PE	20	26	18	26
transcript|tr|Q4PLX7|Q4PLX7_IXOSC Thioredoxin OS=Ixodes scapularis PE=2 SV=1|e=1.11991E-49|from=9|to=359|frame=3|Fragment_1 - [Locus_4225_Transcript_1/1_Confidence_1.000_Length_447|representative]	Q4PLX7	Ixodes scapularis PE	14	20	13	22
representative transcript|tr|L7MED8|L7MED8_9ACAR Putative acetyltransferase (Fragment) OS=Rhipicephalus pulchellus PE=2 SV=1|e=1.9075E-125|from=3|to=716|frame=3|Fragment_2 - [Locus_1970_Transcript_1/2_Confidence_0.750_Length_2171|UNIGENE]	L7MED8	Rhipicephalus pulchellus PE	12	14	10	28
representative transcript|"tr|B7Q0Z5|B7Q0Z5_IXOSC Membrane-associated protein Hem, putative OS=Ixodes scapularis GN=IscW_ISCW009279 PE=4 SV=1"|e=0|from=71|to=1465|frame=-2|Fragment_1 - [Locus_5960_Transcript_1/1_Confidence_1.000_Length_1478|UNIGENE]	B7Q0Z5	Ixodes scapularis GN	17	15	11	19
representative transcript|tr|L7LY96|L7LY96_9ACAR Putative beta-amyloid binding protein OS=Rhipicephalus pulchellus PE=2 SV=1|e=2.71585E-86|from=3|to=461|frame=3|Fragment_1 - [Locus_11035_Transcript_1/1_Confidence_1.000_Length_461|UNIGENE]	L7LY96	Rhipicephalus pulchellus PE	9	15	11	21
transcript|"tr|B7QHN4|B7QHN4_IXOSC Retinal-binding protein, putative OS=Ixodes scapularis GN=IscW_ISCW023769 PE=4 SV=1"|e=1.8178E-78|from=326|to=1144|frame=2|Fragment_2 - [Locus_865_Transcript_1/4_Confidence_0.500_Length_1147|representative]	B7QHN4	Ixodes scapularis GN	8	9	11	24
transcript|tr|L7M5C8|L7M5C8_9ACAR Uncharacterized protein OS=Rhipicephalus pulchellus PE=2 SV=1|e=1.0678E-132|from=2|to=1000|frame=2|Fragment_2 - [Locus_10210_Transcript_1/1_Confidence_1.000_Length_1002|representative]	L7M5C8	Rhipicephalus pulchellus PE	6	20	6	13
representative transcript|tr|L7M2G8|L7M2G8_9ACAR Putative mitochondrial glycerol-3-phosphate acyltransferase gpat OS=Rhipicephalus pulchellus PE=2 SV=1|e=0|from=643|to=3225|frame=-2|Fragment_6 - [Locus_5900_Transcript_1/1_Confidence_1.000_Length_3382|UNIG	L7M2G8	Rhipicephalus pulchellus PE	13	19	8	15
transcript|tr|L7MHL4|L7MHL4_9ACAR Putative microtubule associated complex (Fragment) OS=Rhipicephalus pulchellus PE=2 SV=1|e=0|from=31|to=2226|frame=1|Fragment_2 - [Locus_2360_Transcript_1/5_Confidence_0.692_Length_2331|representative]	L7MHL4	Rhipicephalus pulchellus PE	8	17	9	12
representative transcript|tr|B7QCH5|B7QCH5_IXOSC Coatomer subunit gamma (Fragment) OS=Ixodes scapularis GN=IscW_ISCW022475 PE=3 SV=1|e=1.96376E-53|from=2|to=424|frame=-3|Fragment_2 - [Locus_4776_Transcript_1/1_Confidence_1.000_Length_426|UNIGENE]	B7QCH5	Ixodes scapularis GN	10	15	8	20
representative transcript|tr|G3MQD5|G3MQD5_9ACAR Putative uncharacterized protein OS=Amblyomma maculatum PE=2 SV=1|e=2.88453E-60|from=181|to=1092|frame=-3|Fragment_2 - [Locus_6555_Transcript_1/1_Confidence_1.000_Length_1139|UNIGENE]	G3MQD5	Amblyomma maculatum PE	0	0	7	13
transcript|tr|L7M158|L7M158_9ACAR Putative hydroxysteroid 17-beta dehydrogenase 11 OS=Rhipicephalus pulchellus PE=2 SV=1|e=1.324E-167|from=161|to=1090|frame=2|Fragment_1 - [Locus_203_Transcript_10/16_Confidence_0.600_Length_3962|representative]	L7M158	Rhipicephalus pulchellus PE	9	19	7	23
transcript|tr|L7LX97|L7LX97_9ACAR Putative oxoprolinase OS=Rhipicephalus pulchellus PE=2 SV=1|e=2.45897E-60|from=1|to=357|frame=1|Fragment_1 - [Locus_26954_Transcript_1/1_Confidence_1.000_Length_357|representative]	L7LX97	Rhipicephalus pulchellus PE	28	22	6	17
representative transcript|tr|L7MAP5|L7MAP5_9ACAR Putative rna-binding protein 5 (Fragment) OS=Rhipicephalus pulchellus PE=2 SV=1|e=4.89476E-82|from=1|to=579|frame=1|Fragment_2 - [Locus_11889_Transcript_1/1_Confidence_1.000_Length_581|UNIGENE]	L7MAP5	Rhipicephalus pulchellus PE	0	18	12	18
transcript|tr|L7MFL3|L7MFL3_9ACAR Putative calponin logy ch domain-containing protein (Fragment) OS=Rhipicephalus pulchellus PE=2 SV=1|e=5.2755E-154|from=208|to=1293|frame=1|Fragment_3 - [Locus_12632_Transcript_1/1_Confidence_1.000_Length_1295|representat	L7MFL3	Rhipicephalus pulchellus PE	1	12	10	13
transcript|tr|L7M0C2|L7M0C2_9ACAR Putative neuronal pas domain-containing protein 2 OS=Rhipicephalus pulchellus PE=2 SV=1|e=0|from=298|to=1710|frame=1|Fragment_1 - [Locus_5220_Transcript_1/2_Confidence_0.750_Length_3929|representative]	L7M0C2	Rhipicephalus pulchellus PE	20	15	11	19
transcript|tr|G3MSE0|G3MSE0_9ACAR Putative uncharacterized protein OS=Amblyomma maculatum PE=2 SV=1|e=0|from=628|to=1893|frame=-1|Fragment_2 - [Locus_4716_Transcript_1/2_Confidence_0.750_Length_2250|representative]	G3MSE0	Amblyomma maculatum PE	9	9	5	18
representative transcript|tr|L7LZ97|L7LZ97_9ACAR Putative kat8 regulatory nsl complex subunit 1 OS=Rhipicephalus pulchellus PE=2 SV=1|e=3.3214E-120|from=2|to=784|frame=2|Fragment_2 - [Locus_11368_Transcript_1/1_Confidence_1.000_Length_784|UNIGENE]	L7LZ97	Rhipicephalus pulchellus PE	5	0	7	18
representative transcript|tr|L7MF97|L7MF97_9ACAR Putative myosin class i heavy chain (Fragment) OS=Rhipicephalus pulchellus PE=2 SV=1|e=3.039E-154|from=1|to=852|frame=-1|Fragment_2 - [Locus_7225_Transcript_1/1_Confidence_1.000_Length_852|UNIGENE]	L7MF97	Rhipicephalus pulchellus PE	21	27	4	23
representative transcript|"tr|B7PIA5|B7PIA5_IXOSC ABC transporter, putative OS=Ixodes scapularis GN=IscW_ISCW004600 PE=3 SV=1"|e=0|from=367|to=2031|frame=1|Fragment_3 - [Locus_5539_Transcript_1/4_Confidence_0.700_Length_2292|UNIGENE]	B7PIA5	Ixodes scapularis GN	10	21	6	14
Dystrophin, putative OS=Ixodes scapularis GN=IscW_ISCW001113 PE=4 SV=1"|e=6.57717E-13|from=312|to=1547|frame=3|Fragment_4 - [Locus_14764_Transcript_1/2_Confidence_0.750_Length_1547|.|"tr|B7P346|B7P346_IXOSC]	B7P346	Ixodes scapularis GN	11	15	4	19
representative transcript|tr|G3MR93|G3MR93_9ACAR Putative uncharacterized protein OS=Amblyomma maculatum PE=2 SV=1|e=0|from=185|to=1231|frame=2|Fragment_1 - [Locus_155_Transcript_3/3_Confidence_0.600_Length_2085|UNIGENE]	G3MR93	Amblyomma maculatum PE	14	15	4	13
transcript|"tr|B7QGL0|B7QGL0_IXOSC Arp2/3, putative OS=Ixodes scapularis GN=IscW_ISCW023170 PE=4 SV=1"|e=1.1237E-146|from=531|to=1349|frame=-1|Fragment_1 - [Locus_6739_Transcript_1/1_Confidence_1.000_Length_1349|representative]	B7QGL0	Ixodes scapularis GN	14	13	6	20
transcript|tr|L7M965|L7M965_9ACAR Putative rho-associated coiled-coil OS=Rhipicephalus pulchellus PE=2 SV=1|e=6.86765E-57|from=1|to=435|frame=1|Fragment_1 - [Locus_21928_Transcript_1/1_Confidence_1.000_Length_435|representative]	L7M965	Rhipicephalus pulchellus PE	8	7	8	24
transcript|tr|L7M6C4|L7M6C4_9ACAR Putative gamma-tubulin complex dgrip91/spc98 component OS=Rhipicephalus pulchellus PE=2 SV=1|e=1.1067E-143|from=1|to=861|frame=1|Fragment_1 - [Locus_6280_Transcript_1/2_Confidence_0.750_Length_864|representative]	L7M6C4	Rhipicephalus pulchellus PE	15	19	4	16
representative transcript|tr|L7LZA4|L7LZA4_9ACAR Putative transcriptional co-repressor sin3a protein OS=Rhipicephalus pulchellus PE=2 SV=1|e=7.25218E-98|from=1|to=537|frame=-2|Fragment_1 - [Locus_16547_Transcript_1/1_Confidence_1.000_Length_538|UNIGENE]	L7LZA4	Rhipicephalus pulchellus PE	12	10	3	15
Putative heparan sulfate proteoglycan 2 (Fragment) OS=Rhipicephalus pulchellus PE=2 SV=1|e=9.02148E-23|from=4|to=342|frame=1|Fragment_1 - [Locus_20504_Transcript_1/1_Confidence_1.000_Length_343|.|tr|L7MJ61|L7MJ61_9ACAR]	L7MJ61	Rhipicephalus pulchellus PE	12	5	4	15
representative transcript|tr|L7LRY7|L7LRY7_9ACAR Putative tick salivary serpin OS=Rhipicephalus pulchellus PE=2 SV=1|e=0|from=168|to=1376|frame=3|Fragment_2 - [Locus_1336_Transcript_1/6_Confidence_0.667_Length_1879|UNIGENE]	L7LRY7	Rhipicephalus pulchellus PE	2	19	2	19
representative transcript|tr|L7M9S7|L7M9S7_9ACAR Putative molecular chaperone sec63 endoplasmic reticulum translocon component OS=Rhipicephalus pulchellus PE=2 SV=1|e=4.4784E-175|from=3|to=1247|frame=3|Fragment_4 - [Locus_4346_Transcript_1/1_Confidence_1.	L7M9S7	Rhipicephalus pulchellus PE	14	25	0	23
transcript|tr|L7LYR0|L7LYR0_9ACAR Putative alanyl-trna synthetase translation OS=Rhipicephalus pulchellus PE=2 SV=1|e=0|from=1148|to=3040|frame=2|Fragment_3 - [Locus_5207_Transcript_1/1_Confidence_1.000_Length_3340|representative]	L7LYR0	Rhipicephalus pulchellus PE	24	20	0	14
representative transcript|tr|L7M6T2|L7M6T2_9ACAR Putative replication factor a 1 rfa1 replication factor a 1 rfa1 OS=Rhipicephalus pulchellus PE=2 SV=1|e=7.11629E-24|from=35|to=472|frame=2|Fragment_1 - [Locus_17481_Transcript_1/1_Confidence_1.000_Length_4	L7M6T2	Rhipicephalus pulchellus PE	26	28	0	30
representative transcript|tr|G3MPT7|G3MPT7_9ACAR Putative uncharacterized protein OS=Amblyomma maculatum PE=2 SV=1|e=2.01252E-98|from=417|to=1097|frame=-2|Fragment_1 - [Locus_972_Transcript_1/1_Confidence_1.000_Length_1395|UNIGENE]	G3MPT7	Amblyomma maculatum PE	0	25	0	16
representative transcript|tr|L7M1D2|L7M1D2_9ACAR Putative eukaryotic translation initiation factor 3 theta subunit protein OS=Rhipicephalus pulchellus PE=2 SV=1|e=2.36014E-83|from=1|to=474|frame=-3|Fragment_1 - [Locus_15639_Transcript_1/1_Confidence_1.000	L7M1D2	Rhipicephalus pulchellus PE	30	18	0	16
representative transcript|tr|G3MNP6|G3MNP6_9ACAR Putative uncharacterized protein OS=Amblyomma maculatum PE=2 SV=1|e=6.6342E-166|from=100|to=927|frame=-2|Fragment_1 - [Locus_8743_Transcript_1/2_Confidence_0.750_Length_928|UNIGENE]	G3MNP6	Amblyomma maculatum PE	26	23	0	23
representative transcript|tr|G3MPV1|G3MPV1_9ACAR Putative uncharacterized protein OS=Amblyomma maculatum PE=2 SV=1|e=0|from=249|to=2075|frame=3|Fragment_1 - [Locus_1205_Transcript_2/8_Confidence_0.619_Length_3384|UNIGENE]	G3MPV1	Amblyomma maculatum PE	21	30	0	23
representative transcript|"tr|B7PGP4|B7PGP4_IXOSC Serpin 2, putative OS=Ixodes scapularis GN=IscW_ISCW004156 PE=3 SV=1"|e=3.6636E-115|from=722|to=1888|frame=-1|Fragment_3 - [Locus_806_Transcript_11/13_Confidence_0.514_Length_2020|UNIGENE]	B7PGP4	Ixodes scapularis GN	17	20	0	26
transcript|"tr|B7PNV1|B7PNV1_IXOSC Protocadherin-21, putative (Fragment) OS=Ixodes scapularis GN=IscW_ISCW018781 PE=4 SV=1"|e=0|from=2779|to=4920|frame=1|Fragment_2 - [Locus_6004_Transcript_1/1_Confidence_1.000_Length_5581|representative]	B7PNV1	Ixodes scapularis GN	0	14	0	14
transcript|tr|L7M0X0|L7M0X0_9ACAR Uncharacterized protein OS=Rhipicephalus pulchellus PE=2 SV=1|e=5.8817E-137|from=2|to=799|frame=-2|Fragment_2 - [Locus_7972_Transcript_1/1_Confidence_1.000_Length_866|representative]	L7M0X0	Rhipicephalus pulchellus PE	10	14	0	12
representative transcript|tr|L7M9X6|L7M9X6_9ACAR Putative polypeptide n-acetylgalactosaminyltransferase OS=Rhipicephalus pulchellus PE=2 SV=1|e=0|from=40|to=1974|frame=1|Fragment_4 - [Locus_4382_Transcript_1/1_Confidence_1.000_Length_2281|UNIGENE]	L7M9X6	Rhipicephalus pulchellus PE	13	11	0	14
transcript|tr|L7M0K2|L7M0K2_9ACAR Putative 28s ribosomal protein s24 OS=Rhipicephalus pulchellus PE=2 SV=1|e=2.35189E-92|from=7|to=522|frame=1|Fragment_1 - [Locus_6711_Transcript_1/1_Confidence_1.000_Length_2378|representative]	L7M0K2	Rhipicephalus pulchellus PE	19	22	0	40
representative transcript|tr|G3MJZ2|G3MJZ2_9ACAR Putative uncharacterized protein OS=Amblyomma maculatum PE=2 SV=1|e=0|from=94|to=1347|frame=1|Fragment_1 - [Locus_5489_Transcript_1/1_Confidence_1.000_Length_2240|UNIGENE]	G3MJZ2	Amblyomma maculatum PE	7	12	0	18
representative transcript|tr|L7LZV9|L7LZV9_9ACAR Putative phosphatidic acid-preferring phospholipase a1 OS=Rhipicephalus pulchellus PE=2 SV=1|e=6.27765E-94|from=2|to=622|frame=2|Fragment_2 - [Locus_12132_Transcript_1/1_Confidence_1.000_Length_623|UNIGENE]	L7LZV9	Rhipicephalus pulchellus PE	0	5	0	13
transcript|tr|G3MSN1|G3MSN1_9ACAR Putative uncharacterized protein OS=Amblyomma maculatum PE=2 SV=1|e=7.2599E-169|from=288|to=1253|frame=-2|Fragment_1 - [Locus_10483_Transcript_1/1_Confidence_1.000_Length_1254|representative]	G3MSN1	Amblyomma maculatum PE	24	29	19	19
representative transcript|tr|L7M1J4|L7M1J4_9ACAR Putative armadillo OS=Rhipicephalus pulchellus PE=2 SV=1|e=0|from=105|to=2522|frame=3|Fragment_1 - [Locus_530_Transcript_1/1_Confidence_1.000_Length_3427|UNIGENE]	L7M1J4	Rhipicephalus pulchellus PE	26	29	18	19
transcript|tr|L7LYB7|L7LYB7_9ACAR Putative conserved secreted protein OS=Rhipicephalus pulchellus PE=2 SV=1|e=0|from=10|to=1698|frame=1|Fragment_2 - [Locus_3928_Transcript_1/2_Confidence_0.667_Length_1699|representative]	L7LYB7	Rhipicephalus pulchellus PE	20	18	21	24
representative transcript|tr|G3MTE8|G3MTE8_9ACAR 60S ribosomal protein L6 OS=Amblyomma maculatum PE=2 SV=1|e=3.5951E-124|from=103|to=852|frame=1|Fragment_2 - [Locus_80_Transcript_1/3_Confidence_0.714_Length_913|UNIGENE]	G3MTE8	Amblyomma maculatum PE	2	11	20	18
transcript|tr|L7M2N3|L7M2N3_9ACAR Putative rna helicase brr2 dead-box superfamily OS=Rhipicephalus pulchellus PE=2 SV=1|e=4.88001E-68|from=3|to=383|frame=-3|Fragment_1 - [Locus_24737_Transcript_1/1_Confidence_1.000_Length_385|representative]	L7M2N3	Rhipicephalus pulchellus PE	20	33	16	13
representative transcript|tr|L7MCT7|L7MCT7_9ACAR Putative programmed cell death 6-interacting protein (Fragment) OS=Rhipicephalus pulchellus PE=2 SV=1|e=0|from=478|to=2886|frame=-1|Fragment_4 - [Locus_1210_Transcript_1/6_Confidence_0.667_Length_3132|UNIGE	L7MCT7	Rhipicephalus pulchellus PE	31	24	18	17
transcript|tr|L7MDM0|L7MDM0_9ACAR Putative reticulon (Fragment) OS=Rhipicephalus pulchellus PE=2 SV=1|e=4.98804E-96|from=196|to=900|frame=1|Fragment_2 - [Locus_1629_Transcript_7/8_Confidence_0.261_Length_1289|representative]	L7MDM0	Rhipicephalus pulchellus PE	24	31	20	26
representative transcript|tr|L7MFY7|L7MFY7_9ACAR Putative isoform cra b (Fragment) OS=Rhipicephalus pulchellus PE=2 SV=1|e=0|from=58|to=1281|frame=-1|Fragment_2 - [Locus_2844_Transcript_1/1_Confidence_1.000_Length_1281|UNIGENE]	L7MFY7	Rhipicephalus pulchellus PE	11	29	21	19
transcript|tr|L7MLR0|L7MLR0_9ACAR Putative annexin (Fragment) OS=Rhipicephalus pulchellus PE=2 SV=1|e=0|from=1339|to=2781|frame=-3|Fragment_4 - [Locus_2034_Transcript_1/1_Confidence_1.000_Length_2783|representative]	L7MLR0	Rhipicephalus pulchellus PE	20	21	19	17
transcript|tr|L7MI37|L7MI37_9ACAR Putative transglutaminase/protease-like logues (Fragment) OS=Rhipicephalus pulchellus PE=2 SV=1|e=0|from=1|to=2313|frame=1|Fragment_3 - [Locus_13331_Transcript_1/1_Confidence_1.000_Length_2534|representative]	L7MI37	Rhipicephalus pulchellus PE	0	17	16	13
transcript|tr|L7M038|L7M038_9ACAR Putative 3-hydroxy-3-methylglutaryl-coa hmg-coa reductase OS=Rhipicephalus pulchellus PE=2 SV=1|e=6.1645E-171|from=54|to=1046|frame=3|Fragment_2 - [Locus_1139_Transcript_1/3_Confidence_0.714_Length_1048|representative]	L7M038	Rhipicephalus pulchellus PE	11	24	18	19
representative transcript|tr|L7M002|L7M002_9ACAR Putative prolyl 4-hydroxylase subunit alpha-1 OS=Rhipicephalus pulchellus PE=2 SV=1|e=0|from=1276|to=2922|frame=1|Fragment_1 - [Locus_2077_Transcript_2/6_Confidence_0.571_Length_3044|UNIGENE]	L7M002	Rhipicephalus pulchellus PE	24	26	14	12
transcript|tr|L7LUK5|L7LUK5_9ACAR Putative tick transposon OS=Rhipicephalus pulchellus PE=2 SV=1|e=4.2796E-107|from=8|to=1954|frame=2|Fragment_8 - [Locus_22680_Transcript_1/1_Confidence_1.000_Length_2316|representative]	L7LUK5	Rhipicephalus pulchellus PE	11	30	17	15
representative transcript|tr|L7M8N7|L7M8N7_9ACAR Putative dsrna-activated protein kinase inhibitor p58 OS=Rhipicephalus pulchellus PE=2 SV=1|e=0|from=648|to=2003|frame=-3|Fragment_1 - [Locus_3425_Transcript_2/4_Confidence_0.667_Length_2239|UNIGENE]	L7M8N7	Rhipicephalus pulchellus PE	19	26	17	18
transcript|tr|L7M6C8|L7M6C8_9ACAR Putative serine/threonine protein kinase OS=Rhipicephalus pulchellus PE=2 SV=1|e=0|from=3|to=1310|frame=3|Fragment_1 - [Locus_17041_Transcript_1/1_Confidence_1.000_Length_1310|representative]	L7M6C8	Rhipicephalus pulchellus PE	24	24	17	19
representative transcript|tr|G3MF23|G3MF23_9ACAR Putative uncharacterized protein OS=Amblyomma maculatum PE=2 SV=1|e=0|from=142|to=1638|frame=1|Fragment_1 - [Locus_459_Transcript_1/1_Confidence_1.000_Length_2108|UNIGENE]	G3MF23	Amblyomma maculatum PE	11	11	13	18
representative transcript|tr|G3MR33|G3MR33_9ACAR Putative uncharacterized protein OS=Amblyomma maculatum PE=2 SV=1|e=0|from=41|to=2032|frame=-1|Fragment_3 - [Locus_12297_Transcript_1/1_Confidence_1.000_Length_2086|UNIGENE]	G3MR33	Amblyomma maculatum PE	18	52	18	25
representative transcript|tr|L7LX55|L7LX55_9ACAR Putative elongation factor g OS=Rhipicephalus pulchellus PE=2 SV=1|e=4.28517E-84|from=3|to=455|frame=-1|Fragment_1 - [Locus_14282_Transcript_1/1_Confidence_1.000_Length_455|UNIGENE]	L7LX55	Rhipicephalus pulchellus PE	20	31	14	17
representative transcript|tr|L7M8S1|L7M8S1_9ACAR Uncharacterized protein OS=Rhipicephalus pulchellus PE=2 SV=1|e=0|from=171|to=1400|frame=-3|Fragment_3 - [Locus_3246_Transcript_1/1_Confidence_1.000_Length_1567|UNIGENE]	L7M8S1	Rhipicephalus pulchellus PE	15	28	17	17
transcript|tr|B4XC05|B4XC05_HAELO Aspartic protease OS=Haemaphysalis longicornis GN=AP PE=2 SV=1|e=4.54654E-62|from=75|to=716|frame=3|Fragment_1 - [Locus_30_Transcript_1/1_Confidence_1.000_Length_1563|representative]	B4XC05	Haemaphysalis longicornis GN	36	30	23	29
representative transcript|tr|L7M6I3|L7M6I3_9ACAR Putative prolyl endopeptidase prolyl oligopeptidase prolyl endopeptidase prolyl oligopeptidase OS=Rhipicephalus pulchellus PE=2 SV=1|e=0|from=171|to=2288|frame=3|Fragment_1 - [Locus_1504_Transcript_1/1_Conf	L7M6I3	Rhipicephalus pulchellus PE	12	18	16	12
transcript|sp|Q4PM31|RS3A_IXOSC 40S ribosomal protein S3a OS=Ixodes scapularis PE=2 SV=1|e=9.6619E-118|from=35|to=784|frame=-1|Fragment_2 - [Locus_1454_Transcript_1/1_Confidence_1.000_Length_823|representative]	Q4PM31	Ixodes scapularis PE	12	23	15	12
transcript|tr|G3MPQ5|G3MPQ5_9ACAR Isocitrate dehydrogenase [NADP] OS=Amblyomma maculatum PE=2 SV=1|e=0|from=3|to=1028|frame=3|Fragment_1 - [Locus_3349_Transcript_3/3_Confidence_0.600_Length_1906|representative]	G3MPQ5	Amblyomma maculatum PE	21	19	17	14
transcript|"tr|B7Q6V9|B7Q6V9_IXOSC AP-2 complex subunit beta-1, putative OS=Ixodes scapularis GN=IscW_ISCW011108 PE=4 SV=1"|e=0|from=3|to=1067|frame=3|Fragment_1 - [Locus_8086_Transcript_1/1_Confidence_1.000_Length_1069|representative]	B7Q6V9	Ixodes scapularis GN	25	25	18	23
representative transcript|tr|L7M774|L7M774_9ACAR Uncharacterized protein OS=Rhipicephalus pulchellus PE=2 SV=1|e=0|from=1|to=1197|frame=1|Fragment_1 - [Locus_17064_Transcript_1/1_Confidence_1.000_Length_1198|UNIGENE]	L7M774	Rhipicephalus pulchellus PE	9	23	18	17
representative transcript|tr|L7MCC0|L7MCC0_9ACAR Putative heat shock protein (Fragment) OS=Rhipicephalus pulchellus PE=2 SV=1|e=0|from=37|to=1044|frame=1|Fragment_1 - [Locus_2127_Transcript_1/1_Confidence_1.000_Length_1293|UNIGENE]	L7MCC0	Rhipicephalus pulchellus PE	15	15	14	13
transcript|tr|L7M3M7|L7M3M7_9ACAR Putative glycyl-trna synthetase OS=Rhipicephalus pulchellus PE=2 SV=1|e=2.3064E-180|from=3|to=956|frame=-1|Fragment_1 - [Locus_4177_Transcript_1/1_Confidence_1.000_Length_983|representative]	L7M3M7	Rhipicephalus pulchellus PE	22	24	13	14
transcript|tr|L7MJ73|L7MJ73_9ACAR Uncharacterized protein (Fragment) OS=Rhipicephalus pulchellus PE=2 SV=1|e=2.14796E-45|from=1|to=441|frame=1|Fragment_1 - [Locus_12894_Transcript_1/1_Confidence_1.000_Length_442|representative]	L7MJ73	Rhipicephalus pulchellus PE	13	38	17	22
transcript|tr|L7LW60|L7LW60_9ACAR Putative s-adenosylcysteine hydrolase OS=Rhipicephalus pulchellus PE=2 SV=1|e=0|from=1|to=1176|frame=1|Fragment_1 - [Locus_4994_Transcript_1/3_Confidence_0.667_Length_4035|representative]	L7LW60	Rhipicephalus pulchellus PE	21	28	22	32
transcript|tr|L7LXL0|L7LXL0_9ACAR Uncharacterized protein OS=Rhipicephalus pulchellus PE=2 SV=1|e=0|from=429|to=2180|frame=3|Fragment_1 - [Locus_1046_Transcript_1/1_Confidence_1.000_Length_2824|representative]	L7LXL0	Rhipicephalus pulchellus PE	9	24	15	14
transcript|tr|L7MDQ8|L7MDQ8_9ACAR Putative f0f1-type atp synthase beta subunit (Fragment) OS=Rhipicephalus pulchellus PE=2 SV=1|e=0|from=3|to=1568|frame=3|Fragment_3 - [Locus_1489_Transcript_1/3_Confidence_0.714_Length_1570|representative]	L7MDQ8	Rhipicephalus pulchellus PE	23	34	16	16
representative transcript|tr|L7LZH0|L7LZH0_9ACAR Putative valyl-trna synthetase translation OS=Rhipicephalus pulchellus PE=2 SV=1|e=9.619E-84|from=1|to=519|frame=1|Fragment_2 - [Locus_21115_Transcript_1/1_Confidence_1.000_Length_521|UNIGENE]	L7LZH0	Rhipicephalus pulchellus PE	9	13	13	17
transcript|tr|G3MNC2|G3MNC2_9ACAR Putative uncharacterized protein OS=Amblyomma maculatum PE=2 SV=1|e=3.0302E-163|from=186|to=1667|frame=3|Fragment_3 - [Locus_5116_Transcript_2/3_Confidence_0.600_Length_1727|representative]	G3MNC2	Amblyomma maculatum PE	30	32	16	20
representative transcript|tr|L7M353|L7M353_9ACAR Uncharacterized protein OS=Rhipicephalus pulchellus PE=2 SV=1|e=0|from=230|to=1480|frame=2|Fragment_1 - [Locus_11325_Transcript_1/1_Confidence_1.000_Length_1481|UNIGENE]	L7M353	Rhipicephalus pulchellus PE	9	26	14	16
representative transcript|tr|L7M6L8|L7M6L8_9ACAR Putative 28s ribosomal protein OS=Rhipicephalus pulchellus PE=2 SV=1|e=0|from=32|to=1315|frame=2|Fragment_3 - [Locus_20101_Transcript_1/1_Confidence_1.000_Length_1359|UNIGENE]	L7M6L8	Rhipicephalus pulchellus PE	15	16	11	12
representative transcript|tr|L7M9Y2|L7M9Y2_9ACAR Uncharacterized protein OS=Rhipicephalus pulchellus PE=2 SV=1|e=0|from=104|to=2023|frame=2|Fragment_1 - [Locus_9618_Transcript_2/3_Confidence_0.714_Length_2103|UNIGENE]	L7M9Y2	Rhipicephalus pulchellus PE	30	14	14	15
representative transcript|tr|G3MK49|G3MK49_9ACAR Putative uncharacterized protein OS=Amblyomma maculatum PE=2 SV=1|e=8.7523E-143|from=8|to=943|frame=2|Fragment_1 - [Locus_280_Transcript_1/1_Confidence_1.000_Length_1003|UNIGENE]	G3MK49	Amblyomma maculatum PE	18	14	16	17
representative transcript|tr|L7M699|L7M699_9ACAR Uncharacterized protein OS=Rhipicephalus pulchellus PE=2 SV=1|e=1.14599E-75|from=649|to=1080|frame=1|Fragment_1 - [Locus_6771_Transcript_1/1_Confidence_1.000_Length_1179|UNIGENE]	L7M699	Rhipicephalus pulchellus PE	6	13	16	14
transcript|tr|A5LHW0|A5LHW0_HAELO Protein disulfide isomerase-1 OS=Haemaphysalis longicornis GN=HlPDI-1 PE=2 SV=1|e=0|from=155|to=1342|frame=2|Fragment_3 - [Locus_340_Transcript_1/3_Confidence_0.667_Length_1343|representative]	A5LHW0	Haemaphysalis longicornis GN	4	15	11	14
representative transcript|tr|L7LYY5|L7LYY5_9ACAR Putative rna helicase nonsense mrna reducing factor pnorf1 OS=Rhipicephalus pulchellus PE=2 SV=1|e=2.6201E-174|from=2|to=1027|frame=2|Fragment_1 - [Locus_8413_Transcript_1/1_Confidence_1.000_Length_1031|UNI	L7LYY5	Rhipicephalus pulchellus PE	15	9	14	22
representative transcript|tr|E0YCE7|E0YCE7_BOOMI Acetylcholinesterase 2 OS=Boophilus microplus GN=AchE2 PE=2 SV=1|e=0|from=737|to=2425|frame=-1|Fragment_1 - [Locus_1702_Transcript_2/5_Confidence_0.636_Length_2500|UNIGENE]	E0YCE7	Boophilus microplus GN	0	12	11	20
representative transcript|tr|B7QE60|B7QE60_IXOSC Putative uncharacterized protein OS=Ixodes scapularis GN=IscW_ISCW022683 PE=4 SV=1|e=0|from=190|to=2073|frame=1|Fragment_1 - [Locus_6500_Transcript_1/1_Confidence_1.000_Length_2221|UNIGENE]	B7QE60	Ixodes scapularis GN	25	29	14	24
representative transcript|tr|L7M328|L7M328_9ACAR Putative chromobox protein log 1 OS=Rhipicephalus pulchellus PE=2 SV=1|e=5.4853E-103|from=469|to=1002|frame=-1|Fragment_1 - [Locus_3128_Transcript_3/4_Confidence_0.500_Length_1284|UNIGENE]	L7M328	Rhipicephalus pulchellus PE	17	23	17	28
representative transcript|tr|L7MAZ4|L7MAZ4_9ACAR Putative enoyl-coa hydratase OS=Rhipicephalus pulchellus PE=2 SV=1|e=0|from=102|to=1274|frame=3|Fragment_1 - [Locus_1064_Transcript_1/7_Confidence_0.647_Length_3335|UNIGENE]	L7MAZ4	Rhipicephalus pulchellus PE	0	22	12	14
representative transcript|tr|L7M9D8|L7M9D8_9ACAR Putative rna polymerase ii transcription elongation factor dsif/supt5h/spt5 OS=Rhipicephalus pulchellus PE=2 SV=1|e=5.865E-106|from=1|to=645|frame=1|Fragment_2 - [Locus_8722_Transcript_1/1_Confidence_1.000_	L7M9D8	Rhipicephalus pulchellus PE	21	24	13	16
transcript|tr|L7M9K9|L7M9K9_9ACAR Putative aconitase/aconitase aconitase superfamily OS=Rhipicephalus pulchellus PE=2 SV=1|e=0|from=222|to=2888|frame=3|Fragment_3 - [Locus_3221_Transcript_1/2_Confidence_0.667_Length_2930|representative]	L7M9K9	Rhipicephalus pulchellus PE	20	25	10	26
representative transcript|tr|E7D1B2|E7D1B2_LATHE Putative 14-3-3 protein isoform 2 (Fragment) OS=Latrodectus hesperus PE=2 SV=1|e=9.9827E-124|from=216|to=911|frame=3|Fragment_1 - [Locus_72_Transcript_2/3_Confidence_0.800_Length_4388|UNIGENE]	E7D1B2	Latrodectus hesperus PE	6	16	11	15
representative transcript|tr|A9P773|A9P773_BOOMI Glycogen synthase kinase OS=Boophilus microplus GN=GSK-3 PE=2 SV=1|e=0|from=173|to=1402|frame=2|Fragment_1 - [Locus_1360_Transcript_1/3_Confidence_0.667_Length_2312|UNIGENE]	A9P773	Boophilus microplus GN	0	16	13	22
transcript|tr|L7M687|L7M687_9ACAR Putative lon protease log 2 peroxisomal-like protein OS=Rhipicephalus pulchellus PE=2 SV=1|e=8.04881E-59|from=2|to=346|frame=-2|Fragment_1 - [Locus_26545_Transcript_1/1_Confidence_1.000_Length_347|representative]	L7M687	Rhipicephalus pulchellus PE	18	20	11	28
transcript|tr|G3MMW0|G3MMW0_9ACAR Putative uncharacterized protein OS=Amblyomma maculatum PE=2 SV=1|e=2.56988E-62|from=1|to=387|frame=1|Fragment_1 - [Locus_1704_Transcript_1/1_Confidence_1.000_Length_444|representative]	G3MMW0	Amblyomma maculatum PE	22	15	15	27
transcript|tr|L7MBL7|L7MBL7_9ACAR Putative pleckstrin logy domain-containing family f member 2 (Fragment) OS=Rhipicephalus pulchellus PE=2 SV=1|e=6.59044E-84|from=1|to=435|frame=1|Fragment_1 - [Locus_6238_Transcript_1/1_Confidence_1.000_Length_436|represe	L7MBL7	Rhipicephalus pulchellus PE	13	12	13	15
representative transcript|tr|L7LWJ4|L7LWJ4_9ACAR Putative 39s ribosomal protein l39 OS=Rhipicephalus pulchellus PE=2 SV=1|e=0|from=1|to=1038|frame=-3|Fragment_1 - [Locus_8113_Transcript_1/1_Confidence_1.000_Length_1076|UNIGENE]	L7LWJ4	Rhipicephalus pulchellus PE	18	0	9	14
transcript|tr|L7MKN7|L7MKN7_9ACAR Putative tick transposon (Fragment) OS=Rhipicephalus pulchellus PE=2 SV=1|e=7.56404E-81|from=3|to=455|frame=3|Fragment_1 - [Locus_21266_Transcript_1/1_Confidence_1.000_Length_455|representative]	L7MKN7	Rhipicephalus pulchellus PE	0	0	12	15
transcript|tr|L7MJQ0|L7MJQ0_9ACAR Putative glycine/serine hydroxymethyltransferase (Fragment) OS=Rhipicephalus pulchellus PE=2 SV=1|e=0|from=5|to=1639|frame=2|Fragment_3 - [Locus_3672_Transcript_4/4_Confidence_0.625_Length_1733|representative]	L7MJQ0	Rhipicephalus pulchellus PE	38	40	12	26
representative transcript|tr|L7M505|L7M505_9ACAR Putative ubiquitin carboxyl-terminal hydrolase 20 OS=Rhipicephalus pulchellus PE=2 SV=1|e=0|from=137|to=2641|frame=2|Fragment_3 - [Locus_3579_Transcript_2/2_Confidence_0.750_Length_2754|UNIGENE]	L7M505	Rhipicephalus pulchellus PE	0	19	11	18
transcript|tr|L7M7G5|L7M7G5_9ACAR Putative sof1-like rrna processing protein OS=Rhipicephalus pulchellus PE=2 SV=1|e=0|from=124|to=1440|frame=1|Fragment_1 - [Locus_1561_Transcript_1/1_Confidence_1.000_Length_1460|representative]	L7M7G5	Rhipicephalus pulchellus PE	19	16	9	13
representative transcript|tr|L7MK01|L7MK01_9ACAR Uncharacterized protein (Fragment) OS=Rhipicephalus pulchellus PE=2 SV=1|e=0|from=3|to=2384|frame=3|Fragment_5 - [Locus_7705_Transcript_1/2_Confidence_0.667_Length_2384|UNIGENE]	L7MK01	Rhipicephalus pulchellus PE	25	22	14	32
representative transcript|tr|G3MM94|G3MM94_9ACAR Putative uncharacterized protein OS=Amblyomma maculatum PE=2 SV=1|e=0|from=160|to=1467|frame=1|Fragment_1 - [Locus_346_Transcript_1/4_Confidence_0.556_Length_1601|UNIGENE]	G3MM94	Amblyomma maculatum PE	9	12	10	15
representative transcript|tr|L7M8C4|L7M8C4_9ACAR Uncharacterized protein OS=Rhipicephalus pulchellus PE=2 SV=1|e=0|from=553|to=1791|frame=-1|Fragment_2 - [Locus_83_Transcript_1/1_Confidence_1.000_Length_1848|UNIGENE]	L7M8C4	Rhipicephalus pulchellus PE	12	12	9	12
transcript|tr|G3ML07|G3ML07_9ACAR Putative uncharacterized protein OS=Amblyomma maculatum PE=2 SV=1|e=0|from=204|to=1391|frame=3|Fragment_2 - [Locus_1125_Transcript_7/12_Confidence_0.559_Length_4108|representative]	G3ML07	Amblyomma maculatum PE	13	16	11	14
representative transcript|tr|L7MHH0|L7MHH0_9ACAR Putative euchromatic histone methyltransferase 1 (Fragment) OS=Rhipicephalus pulchellus PE=2 SV=1|e=4.84283E-32|from=6|to=251|frame=3|Fragment_1 - [Locus_21936_Transcript_1/1_Confidence_1.000_Length_255|UNI	L7MHH0	Rhipicephalus pulchellus PE	15	20	14	22
transcript|tr|L7MEL3|L7MEL3_9ACAR Uncharacterized protein (Fragment) OS=Rhipicephalus pulchellus PE=2 SV=1|e=0|from=77|to=1408|frame=2|Fragment_1 - [Locus_2481_Transcript_1/1_Confidence_1.000_Length_1577|representative]	L7MEL3	Rhipicephalus pulchellus PE	16	12	9	17
transcript|tr|G3MP62|G3MP62_9ACAR Putative uncharacterized protein OS=Amblyomma maculatum PE=2 SV=1|e=2.0641E-130|from=27|to=944|frame=3|Fragment_1 - [Locus_14929_Transcript_1/1_Confidence_1.000_Length_944|representative]	G3MP62	Amblyomma maculatum PE	18	15	11	24
representative transcript|tr|L7M196|L7M196_9ACAR Putative hydroxysteroid 17-beta dehydrogenase 11 OS=Rhipicephalus pulchellus PE=2 SV=1|e=7.0202E-164|from=486|to=1394|frame=3|Fragment_2 - [Locus_415_Transcript_1/9_Confidence_0.593_Length_6864|UNIGENE]	L7M196	Rhipicephalus pulchellus PE	21	15	16	29
transcript|tr|L7M6W4|L7M6W4_9ACAR Putative 60 kDa heat shock protein OS=Rhipicephalus pulchellus PE=2 SV=1|e=2.4867E-153|from=635|to=1549|frame=-2|Fragment_2 - [Locus_1414_Transcript_1/1_Confidence_1.000_Length_1550|representative]	L7M6W4	Rhipicephalus pulchellus PE	11	12	11	18
representative transcript|tr|L7M910|L7M910_9ACAR Putative hypoxia-inducible factor 1 alpha subunit inhibitor OS=Rhipicephalus pulchellus PE=2 SV=1|e=0|from=71|to=1057|frame=2|Fragment_1 - [Locus_3082_Transcript_1/2_Confidence_0.667_Length_1271|UNIGENE]	L7M910	Rhipicephalus pulchellus PE	0	6	8	19
representative transcript|tr|L7M528|L7M528_9ACAR Putative paramyosin OS=Rhipicephalus pulchellus PE=2 SV=1|e=0|from=1|to=1878|frame=1|Fragment_5 - [Locus_7275_Transcript_1/3_Confidence_0.714_Length_2945|UNIGENE]	L7M528	Rhipicephalus pulchellus PE	7	4	12	15
representative transcript|tr|L7M834|L7M834_9ACAR Putative phenylalanyl-trna synthetase beta subunit OS=Rhipicephalus pulchellus PE=2 SV=1|e=1.79725E-50|from=4|to=345|frame=1|Fragment_2 - [Locus_19130_Transcript_1/1_Confidence_1.000_Length_347|UNIGENE]	L7M834	Rhipicephalus pulchellus PE	16	2	10	15
representative transcript|tr|L7MLM2|L7MLM2_9ACAR Putative frayed (Fragment) OS=Rhipicephalus pulchellus PE=2 SV=1|e=0|from=499|to=2154|frame=-1|Fragment_1 - [Locus_1137_Transcript_1/3_Confidence_0.667_Length_2154|UNIGENE]	L7MLM2	Rhipicephalus pulchellus PE	0	0	10	14
transcript|tr|L7M6F9|L7M6F9_9ACAR Uncharacterized protein OS=Rhipicephalus pulchellus PE=2 SV=1|e=6.91249E-94|from=1|to=486|frame=1|Fragment_1 - [Locus_16511_Transcript_1/1_Confidence_1.000_Length_487|representative]	L7M6F9	Rhipicephalus pulchellus PE	32	23	9	13
transcript|"tr|B7PPR2|B7PPR2_IXOSC Cytochrome P450, putative OS=Ixodes scapularis GN=IscW_ISCW006560 PE=3 SV=1"|e=0|from=633|to=2231|frame=-1|Fragment_2 - [Locus_201_Transcript_12/14_Confidence_0.452_Length_2534|representative]	B7PPR2	Ixodes scapularis GN	11	21	9	11
representative transcript|tr|L7MK99|L7MK99_9ACAR Putative tick transposon (Fragment) OS=Rhipicephalus pulchellus PE=2 SV=1|e=3.70802E-32|from=9|to=254|frame=3|Fragment_1 - [Locus_24391_Transcript_1/1_Confidence_1.000_Length_256|UNIGENE]	L7MK99	Rhipicephalus pulchellus PE	21	23	8	19
transcript|tr|L7MH41|L7MH41_9ACAR Putative kinesin-73 (Fragment) OS=Rhipicephalus pulchellus PE=2 SV=1|e=8.49643E-53|from=1|to=306|frame=1|Fragment_1 - [Locus_8265_Transcript_1/1_Confidence_1.000_Length_307|representative]	L7MH41	Rhipicephalus pulchellus PE	16	19	9	13
transcript|tr|G3MR33|G3MR33_9ACAR Putative uncharacterized protein OS=Amblyomma maculatum PE=2 SV=1|e=2.711E-121|from=40|to=735|frame=-3|Fragment_1 - [Locus_10953_Transcript_1/1_Confidence_1.000_Length_737|representative]	G3MR33	Amblyomma maculatum PE	20	32	13	25
representative transcript|tr|G3MFA2|G3MFA2_9ACAR Putative uncharacterized protein (Fragment) OS=Amblyomma maculatum PE=2 SV=1|e=1.4608E-119|from=132|to=1043|frame=-2|Fragment_1 - [Locus_6218_Transcript_1/1_Confidence_1.000_Length_1626|UNIGENE]	G3MFA2	Amblyomma maculatum PE	12	23	11	18
representative transcript|"tr|B7QHE0|B7QHE0_IXOSC Laminin beta 1 chain, putative OS=Ixodes scapularis GN=IscW_ISCW014125 PE=4 SV=1"|e=8.4791E-27|from=3|to=413|frame=3|Fragment_1 - [Locus_17100_Transcript_1/1_Confidence_1.000_Length_413|UNIGENE]	B7QHE0	Ixodes scapularis GN	0	13	7	12
transcript|tr|L7LWW0|L7LWW0_9ACAR Putative calcyclin binding protein OS=Rhipicephalus pulchellus PE=2 SV=1|e=1.0372E-109|from=3|to=632|frame=-3|Fragment_1 - [Locus_9206_Transcript_1/2_Confidence_0.750_Length_721|representative]	L7LWW0	Rhipicephalus pulchellus PE	0	13	10	16
representative transcript|tr|L7M729|L7M729_9ACAR Uncharacterized protein OS=Rhipicephalus pulchellus PE=2 SV=1|e=0|from=1090|to=2700|frame=-2|Fragment_1 - [Locus_4113_Transcript_1/1_Confidence_1.000_Length_2824|UNIGENE]	L7M729	Rhipicephalus pulchellus PE	25	25	10	24
representative transcript|tr|G3MJC1|G3MJC1_9ACAR Putative uncharacterized protein (Fragment) OS=Amblyomma maculatum PE=2 SV=1|e=0|from=1|to=2250|frame=1|Fragment_2 - [Locus_1285_Transcript_1/2_Confidence_0.833_Length_3957|UNIGENE]	G3MJC1	Amblyomma maculatum PE	28	13	11	21
representative transcript|tr|L7LVE7|L7LVE7_9ACAR Putative translation elongation factor ef-1 alpha/tu OS=Rhipicephalus pulchellus PE=2 SV=1|e=0|from=271|to=1890|frame=-2|Fragment_2 - [Locus_3842_Transcript_1/2_Confidence_0.750_Length_2347|UNIGENE]	L7LVE7	Rhipicephalus pulchellus PE	0	7	11	17
transcript|tr|L7M7B2|L7M7B2_9ACAR Putative metalloexopeptidase OS=Rhipicephalus pulchellus PE=2 SV=1|e=5.151E-105|from=2|to=1399|frame=2|Fragment_1 - [Locus_363_Transcript_5/6_Confidence_0.400_Length_1439|representative]	L7M7B2	Rhipicephalus pulchellus PE	14	7	8	14
representative transcript|tr|L7LVW4|L7LVW4_9ACAR Putative f-box only protein 6 OS=Rhipicephalus pulchellus PE=2 SV=1|e=3.9727E-162|from=127|to=993|frame=1|Fragment_1 - [Locus_8309_Transcript_1/1_Confidence_1.000_Length_1038|UNIGENE]	L7LVW4	Rhipicephalus pulchellus PE	15	11	8	16
representative transcript|tr|G3MH00|G3MH00_9ACAR Putative uncharacterized protein (Fragment) OS=Amblyomma maculatum PE=2 SV=1|e=6.3468E-109|from=49|to=693|frame=-3|Fragment_1 - [Locus_658_Transcript_5/7_Confidence_0.294_Length_695|UNIGENE]	G3MH00	Amblyomma maculatum PE	0	6	7	16
transcript|tr|L7MAH3|L7MAH3_9ACAR Putative septin 7 OS=Rhipicephalus pulchellus PE=2 SV=1|e=0|from=47|to=1315|frame=2|Fragment_4 - [Locus_839_Transcript_1/1_Confidence_1.000_Length_2036|representative]	L7MAH3	Rhipicephalus pulchellus PE	4	3	7	21
transcript|tr|L7M1I8|L7M1I8_9ACAR Putative pyridine nucleotide-disulfide oxidoreductase OS=Rhipicephalus pulchellus PE=2 SV=1|e=5.88311E-38|from=269|to=511|frame=2|Fragment_1 - [Locus_12396_Transcript_1/1_Confidence_1.000_Length_511|representative]	L7M1I8	Rhipicephalus pulchellus PE	15	16	7	13
transcript|tr|L7M514|L7M514_9ACAR Putative atp-dependent rna helicase ddx23 OS=Rhipicephalus pulchellus PE=2 SV=1|e=2.2611E-148|from=3|to=797|frame=-3|Fragment_1 - [Locus_4030_Transcript_2/2_Confidence_0.500_Length_799|representative]	L7M514	Rhipicephalus pulchellus PE	33	19	10	21
transcript|tr|L7MCM4|L7MCM4_9ACAR Putative tick transposon (Fragment) OS=Rhipicephalus pulchellus PE=2 SV=1|e=1.674E-115|from=21|to=716|frame=-1|Fragment_1 - [Locus_14665_Transcript_1/1_Confidence_1.000_Length_869|representative]	L7MCM4	Rhipicephalus pulchellus PE	12	10	8	14
transcript|"tr|B7Q1E7|B7Q1E7_IXOSC 60S ribosomal protein L24, putative OS=Ixodes scapularis GN=IscW_ISCW020506 PE=4 SV=1"|e=6.67299E-48|from=191|to=508|frame=-3|Fragment_1 - [Locus_1475_Transcript_1/1_Confidence_1.000_Length_528|representative]	B7Q1E7	Ixodes scapularis GN	19	10	10	18
representative transcript|tr|L7M5C5|L7M5C5_9ACAR Putative snrna-activating protein complex subunit 3 OS=Rhipicephalus pulchellus PE=2 SV=1|e=1.6781E-179|from=66|to=1226|frame=-2|Fragment_1 - [Locus_3397_Transcript_1/1_Confidence_1.000_Length_1326|UNIGENE]	L7M5C5	Rhipicephalus pulchellus PE	9	0	7	15
transcript|tr|L7M2C2|L7M2C2_9ACAR Putative muscle myosin heavy chain OS=Rhipicephalus pulchellus PE=2 SV=1|e=7.9105E-152|from=1|to=1188|frame=-2|Fragment_3 - [Locus_13983_Transcript_1/1_Confidence_1.000_Length_1234|representative]	L7M2C2	Rhipicephalus pulchellus PE	4	0	6	12
transcript|tr|L7MMB3|L7MMB3_9ACAR Putative tick transposon (Fragment) OS=Rhipicephalus pulchellus PE=2 SV=1|e=8.68959E-34|from=1|to=264|frame=-3|Fragment_1 - [Locus_6038_Transcript_1/1_Confidence_1.000_Length_266|representative]	L7MMB3	Rhipicephalus pulchellus PE	23	19	7	12
representative transcript|tr|L7LPK1|L7LPK1_9ACAR Putative mrna splicing factor atp-dependent rna helicase OS=Rhipicephalus pulchellus PE=2 SV=1|e=4.59616E-43|from=1|to=318|frame=1|Fragment_2 - [Locus_15844_Transcript_1/1_Confidence_1.000_Length_318|UNIGEN	L7LPK1	Rhipicephalus pulchellus PE	9	21	5	15
representative transcript|tr|L7MJG5|L7MJG5_9ACAR Putative proteasomal atpase-associated factor 1 (Fragment) OS=Rhipicephalus pulchellus PE=2 SV=1|e=0|from=115|to=1311|frame=1|Fragment_1 - [Locus_6422_Transcript_1/3_Confidence_0.667_Length_1728|UNIGENE]	L7MJG5	Rhipicephalus pulchellus PE	0	15	7	15
representative transcript|tr|L7M695|L7M695_9ACAR Putative ribonuclease p/mrp protein subunit pop5 OS=Rhipicephalus pulchellus PE=2 SV=1|e=3.1122E-81|from=168|to=638|frame=3|Fragment_1 - [Locus_1895_Transcript_1/1_Confidence_1.000_Length_675|UNIGENE]	L7M695	Rhipicephalus pulchellus PE	10	11	5	17
representative transcript|tr|L7M9M2|L7M9M2_9ACAR Putative glutaminyl-trna synthetase OS=Rhipicephalus pulchellus PE=2 SV=1|e=4.55072E-54|from=13|to=348|frame=1|Fragment_1 - [Locus_19939_Transcript_1/1_Confidence_1.000_Length_350|UNIGENE]	L7M9M2	Rhipicephalus pulchellus PE	11	9	13	14
representative transcript|tr|G3MNI6|G3MNI6_9ACAR Putative uncharacterized protein OS=Amblyomma maculatum PE=2 SV=1|e=0|from=153|to=1373|frame=3|Fragment_1 - [Locus_6520_Transcript_1/1_Confidence_1.000_Length_1415|UNIGENE]	G3MNI6	Amblyomma maculatum PE	12	6	6	18
representative transcript|tr|G3MMG7|G3MMG7_9ACAR Putative uncharacterized protein OS=Amblyomma maculatum PE=2 SV=1|e=1.3222E-112|from=115|to=867|frame=1|Fragment_1 - [Locus_5044_Transcript_1/2_Confidence_0.667_Length_1054|UNIGENE]	G3MMG7	Amblyomma maculatum PE	9	0	5	15
representative transcript|tr|L7MMC5|L7MMC5_9ACAR Putative tick transposon (Fragment) OS=Rhipicephalus pulchellus PE=2 SV=1|e=3.97667E-26|from=97|to=279|frame=-1|Fragment_1 - [Locus_24822_Transcript_1/1_Confidence_1.000_Length_279|UNIGENE]	L7MMC5	Rhipicephalus pulchellus PE	12	15	5	26
transcript|tr|E2J6R1|E2J6R1_9ACAR 40S ribosomal protein S2/30S ribosomal protein S5 OS=Hyalomma marginatum rufipes PE=2 SV=1|e=2.25933E-78|from=3|to=422|frame=3|Fragment_1 - [Locus_1625_Transcript_1/1_Confidence_1.000_Length_422|representative]	E2J6R1	Hyalomma marginatum rufipes PE	0	9	4	15
representative transcript|tr|L7MKI9|L7MKI9_9ACAR Putative 3-methylcrotonyl-coa carboxylase non-biotin (Fragment) OS=Rhipicephalus pulchellus PE=2 SV=1|e=0|from=3|to=1694|frame=3|Fragment_1 - [Locus_6277_Transcript_1/6_Confidence_0.600_Length_1860|UNIGENE]	L7MKI9	Rhipicephalus pulchellus PE	17	8	5	14
representative transcript|tr|G3MHC5|G3MHC5_9ACAR Putative uncharacterized protein (Fragment) OS=Amblyomma maculatum PE=2 SV=1|e=0|from=54|to=1199|frame=3|Fragment_1 - [Locus_28_Transcript_3/3_Confidence_0.667_Length_3279|UNIGENE]	G3MHC5	Amblyomma maculatum PE	16	7	5	22
representative transcript|tr|L7MI03|L7MI03_9ACAR Putative arginine/serine rich splicing factor (Fragment) OS=Rhipicephalus pulchellus PE=2 SV=1|e=0|from=69|to=1463|frame=3|Fragment_5 - [Locus_2086_Transcript_1/2_Confidence_0.750_Length_1590|UNIGENE]	L7MI03	Rhipicephalus pulchellus PE	0	5	6	23
transcript|tr|L7MCV3|L7MCV3_9ACAR Uncharacterized protein (Fragment) OS=Rhipicephalus pulchellus PE=2 SV=1|e=4.21114E-70|from=3|to=572|frame=-2|Fragment_1 - [Locus_12875_Transcript_1/1_Confidence_1.000_Length_576|representative]	L7MCV3	Rhipicephalus pulchellus PE	16	17	3	20
transcript|tr|G3MQ31|G3MQ31_9ACAR Putative uncharacterized protein OS=Amblyomma maculatum PE=2 SV=1|e=5.4666E-145|from=54|to=827|frame=3|Fragment_1 - [Locus_11806_Transcript_1/1_Confidence_1.000_Length_827|representative]	G3MQ31	Amblyomma maculatum PE	8	7	3	15
representative transcript|tr|L7M8G9|L7M8G9_9ACAR Putative mitochondrial/chloroplast ribosomal protein l3 OS=Rhipicephalus pulchellus PE=2 SV=1|e=8.4953E-125|from=17|to=706|frame=2|Fragment_1 - [Locus_8973_Transcript_1/1_Confidence_1.000_Length_708|UNIGENE	L7M8G9	Rhipicephalus pulchellus PE	7	11	5	20
representative transcript|tr|G3MNH1|G3MNH1_9ACAR Putative uncharacterized protein OS=Amblyomma maculatum PE=2 SV=1|e=0|from=273|to=1688|frame=-2|Fragment_2 - [Locus_2841_Transcript_1/3_Confidence_0.667_Length_1851|UNIGENE]	G3MNH1	Amblyomma maculatum PE	9	9	2	12
representative transcript|tr|G3MR25|G3MR25_9ACAR Putative uncharacterized protein OS=Amblyomma maculatum PE=2 SV=1|e=6.73615E-50|from=1|to=279|frame=-3|Fragment_1 - [Locus_10146_Transcript_1/1_Confidence_1.000_Length_281|UNIGENE]	G3MR25	Amblyomma maculatum PE	11	11	2	18
transcript|"tr|B7PIP9|B7PIP9_IXOSC Ankyrin 2,3/unc44, putative OS=Ixodes scapularis GN=IscW_ISCW018406 PE=4 SV=1"|e=7.16205E-11|from=11|to=352|frame=2|Fragment_1 - [Locus_7861_Transcript_1/1_Confidence_1.000_Length_382|representative]	B7PIP9	Ixodes scapularis GN	23	24	1	19
representative transcript|tr|L7MMB8|L7MMB8_9ACAR Uncharacterized protein (Fragment) OS=Rhipicephalus pulchellus PE=2 SV=1|e=4.17067E-31|from=7|to=249|frame=1|Fragment_1 - [Locus_13845_Transcript_1/1_Confidence_1.000_Length_296|UNIGENE]	L7MMB8	Rhipicephalus pulchellus PE	8	9	1	25
representative transcript|tr|L7M8W3|L7M8W3_9ACAR Putative molecular chaperone dnaj superfamily OS=Rhipicephalus pulchellus PE=2 SV=1|e=0|from=74|to=1297|frame=2|Fragment_2 - [Locus_2645_Transcript_1/1_Confidence_1.000_Length_2730|UNIGENE]	L7M8W3	Rhipicephalus pulchellus PE	6	28	0	19
transcript|"tr|B7QN06|B7QN06_IXOSC Cullin, putative (Fragment) OS=Ixodes scapularis GN=IscW_ISCW023865 PE=3 SV=1"|e=2.3604E-160|from=2|to=907|frame=2|Fragment_2 - [Locus_4275_Transcript_1/1_Confidence_1.000_Length_908|representative]	B7QN06	Ixodes scapularis GN	0	19	0	15
transcript|tr|L7MCZ6|L7MCZ6_9ACAR Putative scinderin like a (Fragment) OS=Rhipicephalus pulchellus PE=2 SV=1|e=0|from=1245|to=3323|frame=-1|Fragment_1 - [Locus_2336_Transcript_3/7_Confidence_0.611_Length_3323|representative]	L7MCZ6	Rhipicephalus pulchellus PE	19	26	0	15
transcript|tr|B7QEJ6|B7QEJ6_IXOSC Putative uncharacterized protein OS=Ixodes scapularis GN=IscW_ISCW012164 PE=4 SV=1|e=0|from=138|to=1550|frame=3|Fragment_1 - [Locus_3669_Transcript_1/1_Confidence_1.000_Length_1619|representative]	B7QEJ6	Ixodes scapularis GN	12	16	0	12
transcript|"tr|B7PYH7|B7PYH7_IXOSC Casein kinase, putative OS=Ixodes scapularis GN=IscW_ISCW009144 PE=4 SV=1"|e=0|from=323|to=1636|frame=2|Fragment_3 - [Locus_10846_Transcript_2/2_Confidence_0.750_Length_1637|representative]	B7PYH7	Ixodes scapularis GN	14	16	0	15
representative transcript|tr|L7MBB1|L7MBB1_9ACAR Uncharacterized protein (Fragment) OS=Rhipicephalus pulchellus PE=2 SV=1|e=4.66855E-51|from=2|to=355|frame=-1|Fragment_2 - [Locus_21095_Transcript_1/1_Confidence_1.000_Length_355|UNIGENE]	L7MBB1	Rhipicephalus pulchellus PE	19	17	0	28
representative transcript|"tr|B7P9N8|B7P9N8_IXOSC Acetyl-coenzyme A synthetase, cytoplasmic, putative (Fragment) OS=Ixodes scapularis GN=IscW_ISCW016681 PE=4 SV=1"|e=0|from=1705|to=3423|frame=-3|Fragment_1 - [Locus_78_Transcript_10/11_Confidence_0.581_Len	B7P9N8	Ixodes scapularis GN	16	15	0	15
transcript|tr|L7M8K5|L7M8K5_9ACAR Uncharacterized protein OS=Rhipicephalus pulchellus PE=2 SV=1|e=5.3925E-169|from=238|to=1377|frame=-1|Fragment_1 - [Locus_5603_Transcript_1/2_Confidence_0.750_Length_1512|representative]	L7M8K5	Rhipicephalus pulchellus PE	0	17	0	22
transcript|"tr|B7P593|B7P593_IXOSC RNA recognition rrm/rnp domain, putative OS=Ixodes scapularis GN=IscW_ISCW015614 PE=4 SV=1"|e=4.51414E-38|from=62|to=313|frame=2|Fragment_2 - [Locus_12532_Transcript_1/1_Confidence_1.000_Length_336|representative]	B7P593	Ixodes scapularis GN	16	16	0	15
representative transcript|tr|G3MNQ8|G3MNQ8_9ACAR Aspartate aminotransferase OS=Amblyomma maculatum PE=2 SV=1|e=0|from=110|to=1330|frame=2|Fragment_1 - [Locus_4889_Transcript_1/1_Confidence_1.000_Length_1840|UNIGENE]	G3MNQ8	Amblyomma maculatum PE	10	15	0	26
transcript|tr|L7MKH5|L7MKH5_9ACAR Uncharacterized protein (Fragment) OS=Rhipicephalus pulchellus PE=2 SV=1|e=0|from=2|to=1231|frame=-3|Fragment_2 - [Locus_3155_Transcript_1/2_Confidence_0.500_Length_1233|representative]	L7MKH5	Rhipicephalus pulchellus PE	16	12	0	18
representative transcript|sp|P83606|BMTI6_BOOMI Kunitz-type serine protease inhibitor 6 (Fragment) OS=Boophilus microplus PE=1 SV=2|e=5.5149E-145|from=1162|to=1926|frame=-2|Fragment_1 - [Locus_7_Transcript_2/8_Confidence_0.500_Length_1927|UNIGENE]	P83606	Boophilus microplus PE	16	20	0	14
representative transcript|tr|L7M282|L7M282_9ACAR Putative soluble epoxide hydrolase OS=Rhipicephalus pulchellus PE=2 SV=1|e=2.6776E-88|from=381|to=1403|frame=3|Fragment_1 - [Locus_2949_Transcript_1/5_Confidence_0.667_Length_1488|UNIGENE]	L7M282	Rhipicephalus pulchellus PE	3	9	0	16
representative transcript|tr|L7M096|L7M096_9ACAR Putative toll-like receptor 5 OS=Rhipicephalus pulchellus PE=2 SV=1|e=9.0616E-168|from=109|to=1053|frame=1|Fragment_1 - [Locus_4796_Transcript_4/4_Confidence_0.444_Length_1116|UNIGENE]	L7M096	Rhipicephalus pulchellus PE	11	10	0	18
representative transcript|"tr|B7PZ95|B7PZ95_IXOSC DNA primase 58 KD subunit, putative OS=Ixodes scapularis GN=IscW_ISCW020012 PE=4 SV=1"|e=1.3219E-110|from=1|to=756|frame=-3|Fragment_1 - [Locus_8848_Transcript_1/1_Confidence_1.000_Length_758|UNIGENE]	B7PZ95	Ixodes scapularis GN	12	7	0	17
representative transcript|tr|L7M614|L7M614_9ACAR Putative dna polymerase v dna polymerase v OS=Rhipicephalus pulchellus PE=2 SV=1|e=1.3515E-117|from=4|to=717|frame=-1|Fragment_1 - [Locus_9744_Transcript_1/1_Confidence_1.000_Length_717|UNIGENE]	L7M614	Rhipicephalus pulchellus PE	0	20	0	20
representative transcript|tr|F0JA22|F0JA22_AMBVA Hypoxanthine-guanine phosphoribosyltransferase OS=Amblyomma variegatum PE=2 SV=1|e=2.4219E-118|from=102|to=758|frame=3|Fragment_1 - [Locus_11489_Transcript_1/1_Confidence_1.000_Length_1176|UNIGENE]	F0JA22	Amblyomma variegatum PE	0	7	0	14
representative transcript|tr|G3MQU6|G3MQU6_9ACAR Putative uncharacterized protein OS=Amblyomma maculatum PE=2 SV=1|e=8.36146E-54|from=3|to=380|frame=3|Fragment_1 - [Locus_5502_Transcript_1/2_Confidence_0.667_Length_472|UNIGENE]	G3MQU6	Amblyomma maculatum PE	9	6	0	16
representative transcript|tr|L7LXV1|L7LXV1_9ACAR Putative dnaj molecular chaperone logy domain protein OS=Rhipicephalus pulchellus PE=2 SV=1|e=1.6907E-107|from=5|to=601|frame=-1|Fragment_1 - [Locus_6374_Transcript_3/3_Confidence_0.600_Length_727|UNIGENE]	L7LXV1	Rhipicephalus pulchellus PE	9	5	0	18
transcript|tr|L7MAD0|L7MAD0_9ACAR Putative tick transposon (Fragment) OS=Rhipicephalus pulchellus PE=2 SV=1|e=6.92867E-83|from=91|to=1122|frame=-3|Fragment_2 - [Locus_18384_Transcript_1/1_Confidence_1.000_Length_1124|representative]	L7MAD0	Rhipicephalus pulchellus PE	0	3	0	16
transcript|"tr|B7PBG4|B7PBG4_IXOSC RPE-spondin, putative OS=Ixodes scapularis GN=IscW_ISCW003427 PE=4 SV=1"|e=1.40246E-86|from=2|to=562|frame=-3|Fragment_1 - [Locus_15347_Transcript_1/1_Confidence_1.000_Length_564|representative]	B7PBG4	Ixodes scapularis GN	16	0	0	17
transcript|tr|L7LYF6|L7LYF6_9ACAR Uncharacterized protein OS=Rhipicephalus pulchellus PE=2 SV=1|e=1.4081E-172|from=98|to=1015|frame=2|Fragment_1 - [Locus_6134_Transcript_1/1_Confidence_1.000_Length_1016|representative]	L7LYF6	Rhipicephalus pulchellus PE	9	0	0	13
transcript|tr|L7MME6|L7MME6_9ACAR Uncharacterized protein (Fragment) OS=Rhipicephalus pulchellus PE=2 SV=1|e=0|from=80|to=1483|frame=2|Fragment_2 - [Locus_5996_Transcript_1/4_Confidence_0.556_Length_1574|representative]	L7MME6	Rhipicephalus pulchellus PE	8	0	0	11
representative transcript|tr|L7M5U9|L7M5U9_9ACAR Putative dihydrolipoamide transacylase alpha-keto acid dehydrogenase e2 subunit OS=Rhipicephalus pulchellus PE=2 SV=1|e=4.16073E-65|from=1497|to=1868|frame=-1|Fragment_1 - [Locus_4041_Transcript_1/1_Confide	L7M5U9	Rhipicephalus pulchellus PE	8	0	0	64
representative transcript|tr|H6BG92|H6BG92_BOOMI Inorganic pyrophosphatase OS=Boophilus microplus PE=2 SV=1|e=0|from=209|to=1231|frame=2|Fragment_1 - [Locus_2800_Transcript_1/1_Confidence_1.000_Length_1306|UNIGENE]	H6BG92	Boophilus microplus PE	0	0	0	17
representative transcript|tr|L7M207|L7M207_9ACAR Putative zinc finger fyve domain protein OS=Rhipicephalus pulchellus PE=2 SV=1|e=0|from=60|to=1484|frame=3|Fragment_1 - [Locus_9690_Transcript_1/1_Confidence_1.000_Length_1484|UNIGENE]	L7M207	Rhipicephalus pulchellus PE	0	0	0	14
representative transcript|tr|L7M6Z3|L7M6Z3_9ACAR Putative negative regulator of transcription OS=Rhipicephalus pulchellus PE=2 SV=1|e=5.6381E-134|from=2|to=775|frame=2|Fragment_2 - [Locus_15121_Transcript_1/1_Confidence_1.000_Length_823|UNIGENE]	L7M6Z3	Rhipicephalus pulchellus PE	8	0	27	19
representative transcript|tr|G3MLU6|G3MLU6_9ACAR Putative uncharacterized protein OS=Amblyomma maculatum PE=2 SV=1|e=0|from=14|to=1696|frame=2|Fragment_4 - [Locus_9400_Transcript_1/1_Confidence_1.000_Length_1833|UNIGENE]	G3MLU6	Amblyomma maculatum PE	17	26	19	13
[truncated: 4,856 more rows]

## Sheet: Column description (2)
Column description
[truncated: 5 more rows]

## Sheet: Identified proteins
Tick, Babesia and Bovine proteins identified after search against Uniprot DB Ixodidae-Bos taurus-Babesia. FDR < 5%, ≥ 2 peptides per protein
[truncated: 11,579 more rows]

[truncated: 1 more sheets: Column description (3)]
